# Supplementary material for: ALA‐A2 Is a Novel Anticancer Peptide Inspired by Alpha‐Lactalbumin: A Discovery from a Computational Peptide Library, In Silico Anticancer Peptide Screening and In Vitro Experimental Validation
Source: PubMed Central journal article supplement (PMC10000267; doi:10.1002/gch2.202200213), 2023-01-12
Supplement: GCH2-7-2200213-s001.pdf [file GCH2-7-2200213-s001.pdf]

## Supporting Information

for *Global Challenges*, DOI: 10.1002/gch2.202200213

ALA-A2 Is a Novel Anticancer Peptide Inspired by Alpha-Lactalbumin: A Discovery from a Computational Peptide Library, In Silico Anticancer Peptide Screening and In Vitro Experimental Validation

*Tassanee Lerksuthirat, Pasinee On-yam, Sermsiri Chitphuk, Wasana Stitchantrakul, David S. Newburg, Ardythe L. Morrow, Suradej Hongeng, Wararat Chiangjong,\* and Somchai Chutipongtanate\**

## Supporting Information

**ALA-A2 is a novel anticancer peptide inspired by alpha-lactalbumin:**

**A discovery from a computational peptide library, *in silico* anticancer peptide screening and *in vitro* experimental validation**

*Tassanee Lerksuthirat,<sup>#</sup> Pasinee On-yam,<sup>#</sup> Sermsiri Chitphuk, Wasana Stitchantrakul, David S. Newburg, Ardythe L. Morrow, Suradej Hongeng, Wararat Chiangjong\* and Somchai Chutipongtanate\**

This PDF file contains three supplementary tables as follows;.

**Table S1.** ACP prediction and screening of 2688 generated alpha-lactalbumin peptides. (*pages 2-44*)

**Table S2.** Processed and raw SWATH-intensity proteomic data sets of ALA-A2 treated (ACP) vs. untreated (Ctrl) A549 cells. (*pages 45-47*)

**Table S3.** Reactome pathway enrichment analysis of the significantly differentially expressed proteins of ALA-A2 treated A549 cells. (*pages 48-56*)

**Table S1:** Physicochemical properties and ACP probabilities by three machine learning models of 2688 all possible peptides generated in silico from alpha lactalbumin.

| No. | peptide sequence | peptide length | Hydrophobicity | Steric hindrance | Sidebulk | Hydropathicity | Amphipathicity | Hydrophilicity | Net Hydrogen | Charge | pl    | Molecular weight | ACPred-FL | Anticp2 | mACPred |
|-----|------------------|----------------|----------------|------------------|----------|----------------|----------------|----------------|--------------|--------|-------|------------------|-----------|---------|---------|
| 1   | MRFFV            | 5              | 0.05           | 0.71             | 0.71     | 1.44           | 0.49           | -0.96          | 0.8          | 1      | 10.11 | 698.94           | no data   | 0.68    | 0.98    |
| 2   | RFFVP            | 5              | -0.01          | 0.63             | 0.63     | 0.74           | 0.49           | -0.7           | 0.8          | 1      | 10.11 | 664.86           | no data   | 0.74    | 0.93    |
| 3   | FFVPL            | 5              | 0.44           | 0.6              | 0.6      | 2.4            | 0              | -1.66          | 0            | 0      | 5.88  | 621.84           | no data   | 0.77    | 0.95    |
| 4   | FVPLF            | 5              | 0.44           | 0.6              | 0.6      | 2.4            | 0              | -1.66          | 0            | 0      | 5.88  | 621.84           | no data   | 0.82    | 0.98    |
| 5   | VPLFL            | 5              | 0.43           | 0.56             | 0.56     | 2.6            | 0              | -1.52          | 0            | 0      | 5.88  | 587.83           | no data   | 0.79    | 0.95    |
| 6   | PLFLV            | 5              | 0.43           | 0.56             | 0.56     | 2.6            | 0              | -1.52          | 0            | 0      | 5.88  | 587.83           | no data   | 0.73    | 0.94    |
| 7   | FLVVG            | 5              | 0.47           | 0.63             | 0.63     | 2.84           | 0              | -1.52          | 0            | 0      | 5.88  | 547.77           | no data   | 0.71    | 0.98    |
| 8   | FLVGI            | 5              | 0.51           | 0.66             | 0.66     | 2.98           | 0              | -1.52          | 0            | 0      | 5.88  | 547.77           | no data   | 0.67    | 0.95    |
| 9   | LVGIL            | 5              | 0.5            | 0.63             | 0.63     | 3.18           | 0              | -1.38          | 0            | 0      | 5.88  | 513.76           | no data   | 0.55    | 0.98    |
| 10  | VGILF            | 5              | 0.51           | 0.66             | 0.66     | 2.98           | 0              | -1.52          | 0            | 0      | 5.88  | 547.77           | no data   | 0.65    | 0.98    |
| 11  | GILFP            | 5              | 0.39           | 0.59             | 0.59     | 1.82           | 0              | -1.22          | 0            | 0      | 5.88  | 545.75           | no data   | 0.64    | 0.98    |
| 12  | ILFPA            | 5              | 0.41           | 0.56             | 0.56     | 2.26           | 0              | -1.32          | 0            | 0      | 5.88  | 559.77           | no data   | 0.73    | 0.97    |
| 13  | LFPAI            | 5              | 0.41           | 0.56             | 0.56     | 2.26           | 0              | -1.32          | 0            | 0      | 5.88  | 559.77           | no data   | 0.58    | 0.93    |
| 14  | FPAIL            | 5              | 0.41           | 0.56             | 0.56     | 2.26           | 0              | -1.32          | 0            | 0      | 5.88  | 559.77           | no data   | 0.64    | 0.96    |
| 15  | PAILA            | 5              | 0.34           | 0.53             | 0.53     | 2.06           | 0              | -0.92          | 0            | 0      | 5.88  | 483.67           | no data   | 0.77    | 0.97    |
| 16  | AILAK            | 5              | 0.13           | 0.59             | 0.59     | 1.6            | 0.73           | -0.32          | 0.4          | 1      | 9.11  | 514.73           | no data   | 0.82    | 0.98    |
| 17  | ILAKQ            | 5              | -0.06          | 0.62             | 0.62     | 0.54           | 0.98           | -0.18          | 0.8          | 1      | 9.11  | 571.79           | no data   | 0.89    | 0.97    |
| 18  | LAKQF            | 5              | -0.08          | 0.62             | 0.62     | 0.2            | 0.98           | -0.32          | 0.8          | 1      | 9.11  | 605.8            | no data   | 0.91    | 0.97    |
| 19  | AKQFT            | 5              | -0.22          | 0.62             | 0.62     | -0.7           | 0.98           | -0.04          | 1            | 1      | 9.11  | 593.74           | no data   | 0.72    | 0.96    |
| 20  | KQFTK            | 5              | -0.49          | 0.65             | 0.65     | -1.84          | 1.72           | 0.66           | 1.4          | 2      | 10.02 | 650.84           | no data   | 0.51    | 0.98    |
| 21  | QFTKC            | 5              | -0.26          | 0.64             | 0.64     | -0.56          | 0.98           | -0.14          | 1            | 1      | 8.57  | 625.8            | no data   | 0.40    | 0.92    |
| 22  | FTKCE            | 5              | -0.25          | 0.64             | 0.64     | -0.56          | 0.99           | 0.42           | 0.8          | 0      | 6.32  | 626.78           | no data   | 0.40    | 0.94    |
| 23  | TKCEL            | 5              | -0.27          | 0.61             | 0.61     | -0.36          | 0.99           | 0.56           | 0.8          | 0      | 6.32  | 592.77           | no data   | 0.41    | 0.71    |
| 24  | KCELS            | 5              | -0.28          | 0.61             | 0.61     | -0.38          | 0.99           | 0.7            | 0.8          | 0      | 6.32  | 578.74           | no data   | 0.30    | 0.69    |
| 25  | CELSQ            | 5              | -0.2           | 0.61             | 0.61     | -0.3           | 0.5            | 0.14           | 0.8          | -1     | 4     | 578.7            | no data   | 0.43    | 0.57    |
| 26  | ELSQL            | 5              | -0.1           | 0.59             | 0.59     | -0.04          | 0.5            | -0.02          | 0.8          | -1     | 4     | 588.73           | no data   | 0.30    | 0.67    |
| 27  | LSQLL            | 5              | 0.13           | 0.56             | 0.56     | 1.42           | 0.25           | -0.98          | 0.6          | 0      | 5.88  | 572.78           | no data   | 0.37    | 0.98    |
| 28  | SQLLK            | 5              | -0.2           | 0.59             | 0.59     | -0.12          | 0.98           | -0.02          | 1            | 1      | 9.11  | 587.79           | no data   | 0.28    | 0.98    |
| 29  | QLLKD            | 5              | -0.29          | 0.64             | 0.64     | -0.66          | 0.98           | 0.52           | 1            | 0      | 6.19  | 615.8            | no data   | 0.26    | 0.81    |
| 30  | LLKDI            | 5              | -0.01          | 0.64             | 0.64     | 0.94           | 0.73           | 0.12           | 0.6          | 0      | 6.19  | 600.83           | no data   | 0.40    | 0.91    |
| 31  | LKID             | 5              | -0.26          | 0.69             | 0.69     | -0.52          | 0.73           | 1.08           | 0.8          | -1     | 4.21  | 602.75           | no data   | 0.43    | 0.80    |
| 32  | KIDIG            | 5              | -0.33          | 0.72             | 0.72     | -1.36          | 0.73           | 1.44           | 0.8          | -1     | 4.21  | 546.64           | no data   | 0.47    | 0.29    |
| 33  | DIDGY            | 5              | -0.11          | 0.72             | 0.72     | -0.84          | 0              | 0.38           | 0.6          | -2     | 3.57  | 581.64           | no data   | 0.55    | 0.43    |
| 34  | IDGYG            | 5              | 0.07           | 0.7              | 0.7      | -0.22          | 0              | -0.22          | 0.4          | -1     | 3.8   | 523.61           | no data   | 0.59    | 0.63    |
| 35  | DGYGG            | 5              | -0.04          | 0.7              | 0.7      | -1.2           | 0              | 0.14           | 0.4          | -1     | 3.8   | 467.5            | no data   | 0.55    | 0.85    |
| 36  | GYGGI            | 5              | 0.25           | 0.69             | 0.69     | 0.4            | 0              | -0.82          | 0.2          | 0      | 5.88  | 465.58           | no data   | 0.55    | 0.98    |
| 37  | YGGIA            | 5              | 0.26           | 0.66             | 0.66     | 0.84           | 0              | -0.92          | 0.2          | 0      | 5.88  | 479.6            | no data   | 0.60    | 0.94    |
| 38  | GGIAL            | 5              | 0.37           | 0.62             | 0.62     | 1.86           | 0              | -0.82          | 0            | 0      | 5.88  | 429.59           | no data   | 0.75    | 0.98    |
| 39  | GIALP            | 5              | 0.32           | 0.56             | 0.56     | 1.62           | 0              | -0.82          | 0            | 0      | 5.88  | 469.65           | no data   | 0.78    | 0.98    |
| 40  | IALPE            | 5              | 0.16           | 0.56             | 0.56     | 1              | 0.25           | -0.22          | 0.2          | -1     | 4     | 541.71           | no data   | 0.78    | 0.90    |
| 41  | ALPEL            | 5              | 0.12           | 0.52             | 0.52     | 0.86           | 0.25           | -0.22          | 0.2          | -1     | 4     | 541.71           | no data   | 0.73    | 0.89    |
| 42  | LPELI            | 5              | 0.22           | 0.56             | 0.56     | 1.4            | 0.25           | -0.48          | 0.2          | -1     | 4     | 583.8            | no data   | 0.61    | 0.63    |
| 43  | PELIC            | 5              | 0.12           | 0.58             | 0.58     | 1.14           | 0.25           | -0.32          | 0.2          | -1     | 4     | 573.77           | no data   | 0.51    | 0.80    |
| 44  | ELICT            | 5              | 0.1            | 0.61             | 0.61     | 1.32           | 0.25           | -0.4           | 0.4          | -1     | 4     | 577.76           | no data   | 0.48    | 0.84    |
| 45  | LICTM            | 5              | 0.28           | 0.63             | 0.63     | 2.4            | 0              | -1.26          | 0.2          | 0      | 5.85  | 579.84           | no data   | 0.60    | 0.98    |
| 46  | ICTMF            | 5              | 0.29           | 0.67             | 0.67     | 2.2            | 0              | -1.4           | 0.2          | 0      | 5.85  | 613.85           | no data   | 0.60    | 0.97    |
| 47  | CTMFH            | 5              | 0.07           | 0.53             | 0.53     | 0.66           | 0.29           | -1.14          | 0.4          | 0.5    | 7.06  | 637.83           | no data   | 0.66    | 0.93    |
| 48  | TMFHT            | 5              | 0.02           | 0.51             | 0.51     | 0.02           | 0.29           | -1.02          | 0.6          | 0.5    | 7.1   | 635.8            | no data   | 0.70    | 0.91    |
| 49  | MFHTS            | 5              | 0.01           | 0.51             | 0.51     | 0              | 0.29           | -0.88          | 0.6          | 0.5    | 7.1   | 621.77           | no data   | 0.56    | 0.64    |
| 50  | FHTSG            | 5              | -0.01          | 0.49             | 0.49     | -0.46          | 0.29           | -0.62          | 0.6          | 0.5    | 7.1   | 547.63           | no data   | 0.37    | 0.98    |
| 51  | HTSGY            | 5              | -0.13          | 0.49             | 0.49     | -1.28          | 0.29           | -0.58          | 0.8          | 0.5    | 7.09  | 563.63           | no data   | 0.28    | 0.87    |
| 52  | TSGYD            | 5              | -0.2           | 0.64             | 0.64     | -1.34          | 0              | 0.12           | 0.8          | -1     | 3.8   | 541.57           | no data   | 0.22    | 0.28    |
| 53  | SGYDT            | 5              | -0.2           | 0.64             | 0.64     | -1.34          | 0              | 0.12           | 0.8          | -1     | 3.8   | 541.57           | no data   | 0.27    | 0.19    |
| 54  | GYDTQ            | 5              | -0.28          | 0.67             | 0.67     | -1.88          | 0.25           | 0.1            | 1            | -1     | 3.8   | 582.63           | no data   | 0.59    | 0.26    |
| 55  | YDTQA            | 5              | -0.26          | 0.64             | 0.64     | -1.44          | 0.25           | 0              | 1            | -1     | 3.8   | 596.65           | no data   | 0.52    | 0.64    |
| 56  | DTQAI            | 5              | -0.12          | 0.64             | 0.64     | -0.28          | 0.25           | 0.1            | 0.8          | -1     | 3.8   | 546.64           | no data   | 0.37    | 0.76    |
| 57  | TQAIV            | 5              | 0.13           | 0.63             | 0.63     | 1.26           | 0.25           | -0.8           | 0.6          | 0      | 5.88  | 530.69           | no data   | 0.48    | 0.90    |
| 58  | QAIVE            | 5              | 0.04           | 0.66             | 0.66     | 0.7            | 0.5            | -0.12          | 0.6          | -1     | 4     | 558.7            | no data   | 0.54    | 0.22    |
| 59  | AIVEN            | 5              | 0.05           | 0.67             | 0.67     | 0.7            | 0.25           | -0.12          | 0.6          | -1     | 4     | 544.67           | no data   | 0.59    | 0.56    |
| 60  | IVENN            | 5              | -0.13          | 0.72             | 0.72     | -0.36          | 0.25           | 0.02           | 1            | -1     | 4     | 587.7            | no data   | 0.71    | 0.72    |
| 61  | VENNE            | 5              | -0.4           | 0.72             | 0.72     | -1.96          | 0.51           | 0.98           | 1.2          | -2     | 3.8   | 603.65           | no data   | 0.43    | 0.61    |
| 62  | ENNES            | 5              | -0.56          | 0.68             | 0.68     | -2.96          | 0.51           | 1.34           | 1.4          | -2     | 3.8   | 591.59           | no data   | 0.35    | 0.52    |

|     |       |   |       |      |      |       |      |       |     |     |       |        |         |      |      |
|-----|-------|---|-------|------|------|-------|------|-------|-----|-----|-------|--------|---------|------|------|
| 63  | NNEST | 5 | -0.47 | 0.65 | 0.65 | -2.4  | 0.25 | 0.66  | 1.4 | -1  | 4     | 563.58 | no data | 0.29 | 0.42 |
| 64  | NESTE | 5 | -0.46 | 0.64 | 0.64 | -2.4  | 0.51 | 1.22  | 1.2 | -2  | 3.8   | 578.59 | no data | 0.30 | 0.42 |
| 65  | ESTEY | 5 | -0.33 | 0.62 | 0.62 | -1.96 | 0.51 | 0.72  | 1   | -2  | 3.8   | 627.66 | no data | 0.43 | 0.41 |
| 66  | STEYG | 5 | -0.18 | 0.62 | 0.62 | -1.34 | 0.25 | 0.12  | 0.8 | -1  | 4     | 555.6  | no data | 0.45 | 0.29 |
| 67  | TEYGL | 5 | -0.02 | 0.62 | 0.62 | -0.42 | 0.25 | -0.3  | 0.6 | -1  | 4     | 581.69 | no data | 0.46 | 0.29 |
| 68  | EYGLF | 5 | 0.14  | 0.66 | 0.66 | 0.28  | 0.25 | -0.72 | 0.4 | -1  | 4     | 627.76 | no data | 0.68 | 0.57 |
| 69  | YGLFQ | 5 | 0.13  | 0.66 | 0.66 | 0.28  | 0.25 | -1.28 | 0.6 | 0   | 5.88  | 626.78 | no data | 0.65 | 0.71 |
| 70  | GLFQI | 5 | 0.27  | 0.66 | 0.66 | 1.44  | 0.25 | -1.18 | 0.4 | 0   | 5.88  | 576.77 | no data | 0.65 | 0.96 |
| 71  | LFQIS | 5 | 0.18  | 0.63 | 0.63 | 1.36  | 0.25 | -1.12 | 0.6 | 0   | 5.88  | 606.79 | no data | 0.68 | 0.97 |
| 72  | FQISN | 5 | -0.05 | 0.67 | 0.67 | -0.1  | 0.25 | -0.72 | 1   | 0   | 5.88  | 607.73 | no data | 0.53 | 0.54 |
| 73  | QISNK | 5 | -0.39 | 0.67 | 0.67 | -1.44 | 0.98 | 0.38  | 1.4 | 1   | 9.11  | 588.73 | no data | 0.59 | 0.24 |
| 74  | ISNKL | 5 | -0.15 | 0.64 | 0.64 | 0.02  | 0.73 | -0.02 | 1   | 1   | 9.11  | 573.76 | no data | 0.78 | 0.87 |
| 75  | SNKLW | 5 | -0.22 | 0.6  | 0.6  | -1.06 | 0.73 | -0.34 | 1.2 | 1   | 9.11  | 646.81 | no data | 0.76 | 0.95 |
| 76  | NKLWC | 5 | -0.16 | 0.62 | 0.62 | -0.4  | 0.73 | -0.6  | 1   | 1   | 8.57  | 662.87 | no data | 0.79 | 0.96 |
| 77  | KLWCK | 5 | -0.25 | 0.6  | 0.6  | -0.48 | 1.47 | -0.04 | 1   | 2   | 9.36  | 676.94 | no data | 0.71 | 0.98 |
| 78  | LWCKS | 5 | -0.08 | 0.57 | 0.57 | 0.14  | 0.73 | -0.58 | 0.8 | 1   | 8.57  | 635.84 | no data | 0.53 | 0.90 |
| 79  | WCKSS | 5 | -0.24 | 0.57 | 0.57 | -0.78 | 0.73 | -0.16 | 1   | 1   | 8.57  | 609.75 | no data | 0.43 | 0.90 |
| 80  | CKSSQ | 5 | -0.45 | 0.61 | 0.61 | -1.3  | 0.98 | 0.56  | 1.2 | 1   | 8.57  | 551.67 | no data | 0.42 | 0.92 |
| 81  | KSSQV | 5 | -0.35 | 0.62 | 0.62 | -0.96 | 0.98 | 0.46  | 1.2 | 1   | 9.11  | 547.67 | no data | 0.74 | 0.30 |
| 82  | SSQVP | 5 | -0.15 | 0.56 | 0.56 | -0.5  | 0.25 | -0.14 | 0.8 | 0   | 5.88  | 516.61 | no data | 0.68 | 0.62 |
| 83  | SQVPQ | 5 | -0.23 | 0.59 | 0.59 | -1.04 | 0.5  | -0.16 | 1   | 0   | 5.88  | 557.67 | no data | 0.60 | 0.69 |
| 84  | QVPQS | 5 | -0.23 | 0.59 | 0.59 | -1.04 | 0.5  | -0.16 | 1   | 0   | 5.88  | 557.67 | no data | 0.51 | 0.47 |
| 85  | VPQSR | 5 | -0.45 | 0.59 | 0.59 | -1.24 | 0.74 | 0.4   | 1.4 | 1   | 10.11 | 585.72 | no data | 0.39 | 0.34 |
| 86  | PQSRN | 5 | -0.68 | 0.6  | 0.6  | -2.78 | 0.74 | 0.74  | 1.8 | 1   | 10.11 | 600.69 | no data | 0.35 | 0.64 |
| 87  | QSRNI | 5 | -0.52 | 0.67 | 0.67 | -1.56 | 0.74 | 0.38  | 1.8 | 1   | 10.11 | 616.74 | no data | 0.43 | 0.23 |
| 88  | SRNIC | 5 | -0.38 | 0.66 | 0.66 | -0.36 | 0.49 | 0.14  | 1.4 | 1   | 8.6   | 591.74 | no data | 0.50 | 0.98 |
| 89  | RNICD | 5 | -0.47 | 0.7  | 0.7  | -0.9  | 0.49 | 0.68  | 1.4 | 0   | 6.16  | 619.75 | no data | 0.57 | 0.93 |
| 90  | NICDI | 5 | 0.03  | 0.71 | 0.71 | 0.9   | 0    | -0.28 | 0.6 | -1  | 3.8   | 576.73 | no data | 0.52 | 0.87 |
| 91  | ICDIS | 5 | 0.1   | 0.66 | 0.66 | 1.44  | 0    | -0.26 | 0.4 | -1  | 3.8   | 549.7  | no data | 0.59 | 0.92 |
| 92  | CDISC | 5 | -0.03 | 0.65 | 0.65 | 1.04  | 0    | -0.1  | 0.4 | -1  | 3.8   | 539.67 | no data | 0.56 | 0.97 |
| 93  | DISCD | 5 | -0.19 | 0.67 | 0.67 | -0.16 | 0    | 0.7   | 0.6 | -2  | 3.57  | 551.62 | no data | 0.56 | 0.67 |
| 94  | ISCDK | 5 | -0.26 | 0.66 | 0.66 | -0.24 | 0.73 | 0.7   | 0.8 | 0   | 6.16  | 564.71 | no data | 0.44 | 0.94 |
| 95  | SCDKF | 5 | -0.29 | 0.66 | 0.66 | -0.58 | 0.73 | 0.56  | 0.8 | 0   | 6.16  | 598.72 | no data | 0.51 | 0.93 |
| 96  | CDKFL | 5 | -0.13 | 0.66 | 0.66 | 0.34  | 0.73 | 0.14  | 0.6 | 0   | 6.16  | 624.81 | no data | 0.72 | 0.98 |
| 97  | DKFLD | 5 | -0.28 | 0.69 | 0.69 | -0.86 | 0.73 | 0.94  | 0.8 | -1  | 4.21  | 636.76 | no data | 0.46 | 0.94 |
| 98  | KFLDD | 5 | -0.28 | 0.69 | 0.69 | -0.86 | 0.73 | 0.94  | 0.8 | -1  | 4.21  | 636.76 | no data | 0.53 | 0.88 |
| 99  | FLDDD | 5 | -0.2  | 0.7  | 0.7  | -0.78 | 0    | 0.94  | 0.6 | -3  | 3.43  | 623.67 | no data | 0.49 | 0.90 |
| 100 | LDDDI | 5 | -0.18 | 0.7  | 0.7  | -0.44 | 0    | 1.08  | 0.6 | -3  | 3.43  | 589.66 | no data | 0.30 | 0.66 |
| 101 | DDDI  | 5 | -0.32 | 0.7  | 0.7  | -1.34 | 0    | 1.36  | 0.8 | -3  | 3.43  | 577.6  | no data | 0.54 | 0.81 |
| 102 | DDITD | 5 | -0.32 | 0.7  | 0.7  | -1.34 | 0    | 1.36  | 0.8 | -3  | 3.43  | 577.6  | no data | 0.46 | 0.84 |
| 103 | DITDD | 5 | -0.32 | 0.7  | 0.7  | -1.34 | 0    | 1.36  | 0.8 | -3  | 3.43  | 577.6  | no data | 0.46 | 0.76 |
| 104 | ITDDI | 5 | -0.03 | 0.69 | 0.69 | 0.26  | 0    | 0.4   | 0.6 | -2  | 3.57  | 575.68 | no data | 0.46 | 0.76 |
| 105 | TDDIM | 5 | -0.13 | 0.71 | 0.71 | -0.26 | 0    | 0.5   | 0.6 | -2  | 3.57  | 593.71 | no data | 0.38 | 0.17 |
| 106 | DDIMC | 5 | -0.08 | 0.72 | 0.72 | 0.38  | 0    | 0.38  | 0.4 | -2  | 3.57  | 595.74 | no data | 0.52 | 0.65 |
| 107 | DIMCA | 5 | 0.11  | 0.68 | 0.68 | 1.44  | 0    | -0.32 | 0.2 | -1  | 3.8   | 551.73 | no data | 0.57 | 0.64 |
| 108 | IMCAK | 5 | 0.04  | 0.66 | 0.66 | 1.36  | 0.73 | -0.32 | 0.4 | 1   | 8.57  | 564.82 | no data | 0.81 | 0.98 |
| 109 | MCAKK | 5 | -0.33 | 0.66 | 0.66 | -0.32 | 1.47 | 0.64  | 0.8 | 2   | 9.36  | 579.83 | no data | 0.93 | 0.98 |
| 110 | CAKKI | 5 | -0.24 | 0.64 | 0.64 | 0.2   | 1.47 | 0.54  | 0.8 | 2   | 9.36  | 561.8  | no data | 0.96 | 0.98 |
| 111 | AKKIL | 5 | -0.14 | 0.62 | 0.62 | 0.46  | 1.47 | 0.38  | 0.8 | 2   | 10.02 | 571.83 | no data | 0.94 | 0.98 |
| 112 | KKILD | 5 | -0.33 | 0.67 | 0.67 | -0.6  | 1.47 | 1.08  | 1   | 1   | 8.94  | 615.84 | no data | 0.68 | 0.91 |
| 113 | KILDI | 5 | 0.03  | 0.67 | 0.67 | 1.08  | 0.73 | 0.12  | 0.6 | 0   | 6.19  | 600.83 | no data | 0.59 | 0.84 |
| 114 | ILDIK | 5 | 0.03  | 0.67 | 0.67 | 1.08  | 0.73 | 0.12  | 0.6 | 0   | 6.19  | 600.83 | no data | 0.51 | 0.80 |
| 115 | LDIKG | 5 | -0.08 | 0.67 | 0.67 | 0.1   | 0.73 | 0.48  | 0.6 | 0   | 6.19  | 544.72 | no data | 0.36 | 0.70 |
| 116 | DIKGI | 5 | -0.04 | 0.7  | 0.7  | 0.24  | 0.73 | 0.48  | 0.6 | 0   | 6.19  | 544.72 | no data | 0.39 | 0.75 |
| 117 | IKGID | 5 | -0.04 | 0.7  | 0.7  | 0.24  | 0.73 | 0.48  | 0.6 | 0   | 6.19  | 544.72 | no data | 0.37 | 0.75 |
| 118 | KGIDY | 5 | -0.18 | 0.7  | 0.7  | -0.92 | 0.73 | 0.38  | 0.8 | 0   | 6.18  | 594.73 | no data | 0.31 | 0.35 |
| 119 | GIDYW | 5 | 0.11  | 0.67 | 0.67 | -0.32 | 0    | -0.9  | 0.6 | -1  | 3.8   | 652.77 | no data | 0.71 | 0.69 |
| 120 | IDYWL | 5 | 0.19  | 0.64 | 0.64 | 0.52  | 0    | -1.26 | 0.6 | -1  | 3.8   | 708.88 | no data | 0.49 | 0.92 |
| 121 | DYWLA | 5 | 0.09  | 0.6  | 0.6  | -0.02 | 0    | -1    | 0.6 | -1  | 3.8   | 666.79 | no data | 0.72 | 0.98 |
| 122 | YWLAH | 5 | 0.15  | 0.45 | 0.45 | 0.04  | 0.29 | -1.7  | 0.6 | 0.5 | 7.09  | 688.85 | no data | 0.72 | 0.98 |
| 123 | WLAHK | 5 | -0.07 | 0.45 | 0.45 | -0.48 | 1.02 | -0.64 | 0.8 | 1.5 | 9.11  | 653.85 | no data | 0.60 | 0.98 |
| 124 | LAHKA | 5 | -0.09 | 0.45 | 0.45 | 0.06  | 1.02 | -0.06 | 0.6 | 1.5 | 9.11  | 538.71 | no data | 0.87 | 0.98 |
| 125 | AHKAL | 5 | -0.09 | 0.45 | 0.45 | 0.06  | 1.02 | -0.06 | 0.6 | 1.5 | 9.11  | 538.71 | no data | 0.94 | 0.97 |
| 126 | HKALC | 5 | -0.14 | 0.47 | 0.47 | 0.2   | 1.02 | -0.16 | 0.6 | 1.5 | 8.57  | 570.77 | no data | 0.82 | 0.97 |

|     |        |   |       |      |      |       |      |       |      |      |       |        |         |      |      |
|-----|--------|---|-------|------|------|-------|------|-------|------|------|-------|--------|---------|------|------|
| 127 | KALCT  | 5 | -0.09 | 0.58 | 0.58 | 0.7   | 0.73 | -0.14 | 0.6  | 1    | 8.57  | 534.73 | no data | 0.83 | 0.97 |
| 128 | ALCTE  | 5 | 0     | 0.58 | 0.58 | 0.78  | 0.25 | -0.14 | 0.4  | -1   | 4     | 535.67 | no data | 0.57 | 0.99 |
| 129 | LCTEK  | 5 | -0.27 | 0.61 | 0.61 | -0.36 | 0.99 | 0.56  | 0.8  | 0    | 6.32  | 592.77 | no data | 0.21 | 0.77 |
| 130 | CTEKL  | 5 | -0.27 | 0.61 | 0.61 | -0.36 | 0.99 | 0.56  | 0.8  | 0    | 6.32  | 592.77 | no data | 0.60 | 0.79 |
| 131 | TEKLE  | 5 | -0.4  | 0.62 | 0.62 | -1.56 | 1.24 | 1.36  | 1    | -1   | 4.54  | 618.75 | no data | 0.55 | 0.37 |
| 132 | EKLEQ  | 5 | -0.5  | 0.65 | 0.65 | -2.12 | 1.49 | 1.48  | 1.2  | -1   | 4.54  | 645.78 | no data | 0.52 | 0.34 |
| 133 | KLEQW  | 5 | -0.3  | 0.61 | 0.61 | -1.6  | 1.24 | 0.2   | 1.2  | 0    | 6.35  | 702.88 | no data | 0.60 | 0.68 |
| 134 | LEQWL  | 5 | 0.02  | 0.58 | 0.58 | -0.06 | 0.5  | -0.76 | 0.8  | -1   | 4     | 687.87 | no data | 0.13 | 0.94 |
| 135 | EQWLC  | 5 | -0.07 | 0.6  | 0.6  | -0.32 | 0.5  | -0.6  | 0.8  | -1   | 4     | 677.84 | no data | 0.12 | 0.95 |
| 136 | QWLCE  | 5 | -0.07 | 0.6  | 0.6  | -0.32 | 0.5  | -0.6  | 0.8  | -1   | 4     | 677.84 | no data | 0.14 | 0.98 |
| 137 | WLCEK  | 5 | -0.16 | 0.6  | 0.6  | -0.4  | 0.99 | -0.04 | 0.8  | 0    | 6.32  | 677.88 | no data | 0.10 | 0.81 |
| 138 | LCEKL  | 5 | -0.12 | 0.61 | 0.61 | 0.54  | 0.99 | 0.28  | 0.6  | 0    | 6.32  | 604.83 | no data | 0.45 | 0.95 |
| 139 | MRFFVP | 6 | 0.03  | 0.65 | 0.65 | 0.93  | 0.41 | -0.8  | 0.67 | 1    | 10.11 | 796.07 | no data | 0.68 | 0.96 |
| 140 | FFVPL  | 6 | 0.08  | 0.61 | 0.61 | 1.25  | 0.41 | -0.88 | 0.67 | 1    | 10.11 | 778.04 | no data | 0.76 | 0.91 |
| 141 | FFVPLF | 6 | 0.47  | 0.61 | 0.61 | 2.47  | 0    | -1.8  | 0    | 0    | 5.88  | 769.03 | no data | 0.83 | 0.98 |
| 142 | FVPLFL | 6 | 0.46  | 0.59 | 0.59 | 2.63  | 0    | -1.68 | 0    | 0    | 5.88  | 735.02 | no data | 0.78 | 0.98 |
| 143 | VPLFLV | 6 | 0.45  | 0.59 | 0.59 | 2.87  | 0    | -1.52 | 0    | 0    | 5.88  | 686.98 | no data | 0.70 | 0.91 |
| 144 | PLFLVG | 6 | 0.38  | 0.58 | 0.58 | 2.1   | 0    | -1.27 | 0    | 0    | 5.88  | 644.9  | no data | 0.72 | 0.98 |
| 145 | LFLVGI | 6 | 0.52  | 0.64 | 0.64 | 3.12  | 0    | -1.57 | 0    | 0    | 5.88  | 660.95 | no data | 0.67 | 0.86 |
| 146 | FLVGIL | 6 | 0.52  | 0.64 | 0.64 | 3.12  | 0    | -1.57 | 0    | 0    | 5.88  | 660.95 | no data | 0.67 | 0.98 |
| 147 | LVGILF | 6 | 0.52  | 0.64 | 0.64 | 3.12  | 0    | -1.57 | 0    | 0    | 5.88  | 660.95 | no data | 0.51 | 0.87 |
| 148 | VGILFP | 6 | 0.42  | 0.61 | 0.61 | 2.22  | 0    | -1.27 | 0    | 0    | 5.88  | 644.9  | no data | 0.62 | 0.98 |
| 149 | GILFPA | 6 | 0.37  | 0.58 | 0.58 | 1.82  | 0    | -1.1  | 0    | 0    | 5.88  | 616.84 | no data | 0.69 | 0.98 |
| 150 | ILFPAI | 6 | 0.46  | 0.58 | 0.58 | 2.63  | 0    | -1.4  | 0    | 0    | 5.88  | 672.95 | no data | 0.62 | 0.98 |
| 151 | LFPAIL | 6 | 0.43  | 0.56 | 0.56 | 2.52  | 0    | -1.4  | 0    | 0    | 5.88  | 672.95 | no data | 0.62 | 0.91 |
| 152 | FPAILA | 6 | 0.38  | 0.56 | 0.56 | 2.18  | 0    | -1.18 | 0    | 0    | 5.88  | 630.86 | no data | 0.73 | 0.97 |
| 153 | PAILAK | 6 | 0.1   | 0.55 | 0.55 | 1.07  | 0.61 | -0.27 | 0.33 | 1    | 9.11  | 611.86 | no data | 0.80 | 0.98 |
| 154 | AILAKQ | 6 | -0.01 | 0.61 | 0.61 | 0.75  | 0.82 | -0.23 | 0.67 | 1    | 9.11  | 642.88 | no data | 0.71 | 0.98 |
| 155 | ILAKQF | 6 | 0.05  | 0.64 | 0.64 | 0.92  | 0.82 | -0.57 | 0.67 | 1    | 9.11  | 718.98 | no data | 0.85 | 0.98 |
| 156 | LAKQFT | 6 | -0.1  | 0.61 | 0.61 | 0.05  | 0.82 | -0.33 | 0.83 | 1    | 9.11  | 706.92 | no data | 0.87 | 0.96 |
| 157 | AKQFTK | 6 | -0.37 | 0.63 | 0.63 | -1.23 | 1.43 | 0.47  | 1.17 | 2    | 10.02 | 721.93 | no data | 0.72 | 0.95 |
| 158 | KQFTKC | 6 | -0.4  | 0.65 | 0.65 | -1.12 | 1.43 | 0.38  | 1.17 | 2    | 9.36  | 753.99 | no data | 0.40 | 0.96 |
| 159 | QFTKCE | 6 | -0.32 | 0.65 | 0.65 | -1.05 | 1.03 | 0.38  | 1    | 0    | 6.32  | 754.93 | no data | 0.40 | 0.43 |
| 160 | FTKCEL | 6 | -0.12 | 0.62 | 0.62 | 0.17  | 0.82 | 0.05  | 0.67 | 0    | 6.32  | 739.96 | no data | 0.37 | 0.79 |
| 161 | TKCELS | 6 | -0.26 | 0.6  | 0.6  | -0.43 | 0.82 | 0.52  | 0.83 | 0    | 6.32  | 679.86 | no data | 0.37 | 0.45 |
| 162 | KCELSQ | 6 | -0.35 | 0.62 | 0.62 | -0.9  | 1.03 | 0.62  | 1    | 0    | 6.32  | 706.89 | no data | 0.37 | 0.44 |
| 163 | CELSQL | 6 | -0.08 | 0.6  | 0.6  | 0.38  | 0.42 | -0.18 | 0.67 | -1   | 4     | 691.88 | no data | 0.25 | 0.56 |
| 164 | ELSQLL | 6 | 0     | 0.58 | 0.58 | 0.6   | 0.42 | -0.32 | 0.67 | -1   | 4     | 701.91 | no data | 0.29 | 0.96 |
| 165 | LSQLLK | 6 | -0.08 | 0.58 | 0.58 | 0.53  | 0.82 | -0.32 | 0.83 | 1    | 9.11  | 700.97 | no data | 0.26 | 0.97 |
| 166 | SQLLKD | 6 | -0.28 | 0.62 | 0.62 | -0.68 | 0.82 | 0.48  | 1    | 0    | 6.19  | 702.89 | no data | 0.26 | 0.80 |
| 167 | QLLKDI | 6 | -0.12 | 0.65 | 0.65 | 0.2   | 0.82 | 0.13  | 0.83 | 0    | 6.19  | 728.98 | no data | 0.28 | 0.75 |
| 168 | LLKDI  | 6 | -0.12 | 0.66 | 0.66 | 0.2   | 0.61 | 0.6   | 0.67 | -1   | 4.21  | 715.93 | no data | 0.45 | 0.94 |
| 169 | LKDIDG | 6 | -0.19 | 0.68 | 0.68 | -0.5  | 0.61 | 0.9   | 0.67 | -1   | 4.21  | 659.82 | no data | 0.44 | 0.18 |
| 170 | KDIDGY | 6 | -0.27 | 0.71 | 0.71 | -1.35 | 0.61 | 0.82  | 0.83 | -1   | 4.21  | 709.83 | no data | 0.44 | 0.05 |
| 171 | DIDGYG | 6 | -0.06 | 0.71 | 0.71 | -0.77 | 0    | 0.32  | 0.5  | -2   | 3.57  | 638.71 | no data | 0.55 | 0.31 |
| 172 | IDGYGG | 6 | 0.09  | 0.7  | 0.7  | -0.25 | 0    | -0.18 | 0.33 | -1   | 3.8   | 580.68 | no data | 0.59 | 0.80 |
| 173 | DGYGGI | 6 | 0.09  | 0.7  | 0.7  | -0.25 | 0    | -0.18 | 0.33 | -1   | 3.8   | 580.68 | no data | 0.55 | 0.79 |
| 174 | GYGGIA | 6 | 0.25  | 0.66 | 0.66 | 0.63  | 0    | -0.77 | 0.17 | 0    | 5.88  | 536.67 | no data | 0.62 | 0.98 |
| 175 | YGGIAL | 6 | 0.31  | 0.63 | 0.63 | 1.33  | 0    | -1.07 | 0.17 | 0    | 5.88  | 592.78 | no data | 0.74 | 0.96 |
| 176 | GGIALP | 6 | 0.29  | 0.58 | 0.58 | 1.28  | 0    | -0.68 | 0    | 0    | 5.88  | 526.72 | no data | 0.75 | 0.98 |
| 177 | GIALPE | 6 | 0.16  | 0.58 | 0.58 | 0.77  | 0.21 | -0.18 | 0.17 | -1   | 4     | 598.78 | no data | 0.77 | 0.81 |
| 178 | IALPEL | 6 | 0.23  | 0.55 | 0.55 | 1.47  | 0.21 | -0.48 | 0.17 | -1   | 4     | 654.89 | no data | 0.69 | 0.74 |
| 179 | ALPELI | 6 | 0.23  | 0.55 | 0.55 | 1.47  | 0.21 | -0.48 | 0.17 | -1   | 4     | 654.89 | no data | 0.71 | 0.71 |
| 180 | LPELIC | 6 | 0.19  | 0.57 | 0.57 | 1.58  | 0.21 | -0.57 | 0.17 | -1   | 4     | 686.95 | no data | 0.59 | 0.80 |
| 181 | PELICT | 6 | 0.07  | 0.57 | 0.57 | 0.83  | 0.21 | -0.33 | 0.33 | -1   | 4     | 674.89 | no data | 0.51 | 0.72 |
| 182 | ELICTM | 6 | 0.13  | 0.64 | 0.64 | 1.42  | 0.21 | -0.55 | 0.33 | -1   | 4     | 708.97 | no data | 0.52 | 0.79 |
| 183 | LICTMF | 6 | 0.33  | 0.64 | 0.64 | 2.47  | 0    | -1.47 | 0.17 | 0    | 5.85  | 727.03 | no data | 0.58 | 0.97 |
| 184 | ICTMFH | 6 | 0.18  | 0.56 | 0.56 | 1.3   | 0.24 | -1.25 | 0.33 | 0.5  | 7.06  | 751.01 | no data | 0.64 | 0.96 |
| 185 | CTMFHT | 6 | 0.02  | 0.53 | 0.53 | 0.43  | 0.24 | -1.02 | 0.5  | 0.5  | 7.06  | 738.95 | no data | 0.66 | 0.87 |
| 186 | TMFHTS | 6 | -0.03 | 0.51 | 0.51 | -0.12 | 0.24 | -0.8  | 0.67 | 0.5  | 7.1   | 722.89 | no data | 0.59 | 0.89 |
| 187 | MFHTSG | 6 | 0.03  | 0.54 | 0.54 | -0.07 | 0.24 | -0.73 | 0.5  | 0.5  | 7.1   | 678.84 | no data | 0.37 | 0.38 |
| 188 | FHTSGY | 6 | -0.01 | 0.52 | 0.52 | -0.6  | 0.24 | -0.9  | 0.67 | 0.5  | 7.09  | 710.82 | no data | 0.34 | 0.86 |
| 189 | HTSGYD | 6 | -0.23 | 0.53 | 0.53 | -1.65 | 0.24 | 0.02  | 0.83 | -0.5 | 5.09  | 678.73 | no data | 0.27 | 0.20 |
| 190 | TSGYDT | 6 | -0.19 | 0.62 | 0.62 | -1.23 | 0    | 0.03  | 0.83 | -1   | 3.8   | 642.69 | no data | 0.21 | 0.26 |

|     |        |   |       |      |      |       |      |       |      |    |       |        |         |      |      |
|-----|--------|---|-------|------|------|-------|------|-------|------|----|-------|--------|---------|------|------|
| 191 | SGYDTQ | 6 | -0.28 | 0.65 | 0.65 | -1.7  | 0.21 | 0.13  | 1    | -1 | 3.8   | 669.72 | no data | 0.31 | 0.16 |
| 192 | GYDTQA | 6 | -0.19 | 0.65 | 0.65 | -1.27 | 0.21 | 0     | 0.83 | -1 | 3.8   | 653.72 | no data | 0.54 | 0.24 |
| 193 | YDTQAI | 6 | -0.1  | 0.65 | 0.65 | -0.45 | 0.21 | -0.3  | 0.83 | -1 | 3.8   | 709.83 | no data | 0.36 | 0.43 |
| 194 | DTQAIV | 6 | -0.01 | 0.65 | 0.65 | 0.47  | 0.21 | -0.17 | 0.67 | -1 | 3.8   | 645.79 | no data | 0.45 | 0.47 |
| 195 | TQAIVE | 6 | 0.01  | 0.64 | 0.64 | 0.47  | 0.42 | -0.17 | 0.67 | -1 | 4     | 659.82 | no data | 0.56 | 0.44 |
| 196 | QAIVEN | 6 | -0.07 | 0.67 | 0.67 | 0     | 0.42 | -0.07 | 0.83 | -1 | 4     | 672.82 | no data | 0.55 | 0.30 |
| 197 | AIVENN | 6 | -0.06 | 0.69 | 0.69 | 0     | 0.21 | -0.07 | 0.83 | -1 | 4     | 658.79 | no data | 0.56 | 0.55 |
| 198 | IVENNE | 6 | -0.21 | 0.71 | 0.71 | -0.88 | 0.42 | 0.52  | 1    | -2 | 3.8   | 716.83 | no data | 0.53 | 0.38 |
| 199 | VENNES | 6 | -0.37 | 0.68 | 0.68 | -1.77 | 0.42 | 0.87  | 1.17 | -2 | 3.8   | 690.74 | no data | 0.42 | 0.26 |
| 200 | ENNEST | 6 | -0.49 | 0.66 | 0.66 | -2.58 | 0.42 | 1.05  | 1.33 | -2 | 3.8   | 692.71 | no data | 0.31 | 0.39 |
| 201 | NNESTE | 6 | -0.49 | 0.66 | 0.66 | -2.58 | 0.42 | 1.05  | 1.33 | -2 | 3.8   | 692.71 | no data | 0.27 | 0.33 |
| 202 | NESTEY | 6 | -0.38 | 0.65 | 0.65 | -2.22 | 0.42 | 0.63  | 1.17 | -2 | 3.8   | 741.78 | no data | 0.30 | 0.37 |
| 203 | ESTEYG | 6 | -0.25 | 0.63 | 0.63 | -1.7  | 0.42 | 0.6   | 0.83 | -2 | 3.8   | 684.73 | no data | 0.44 | 0.11 |
| 204 | STEYGL | 6 | -0.06 | 0.61 | 0.61 | -0.48 | 0.21 | -0.2  | 0.67 | -1 | 4     | 668.78 | no data | 0.41 | 0.26 |
| 205 | TEYGLF | 6 | 0.09  | 0.64 | 0.64 | 0.12  | 0.21 | -0.67 | 0.5  | -1 | 4     | 728.88 | no data | 0.60 | 0.25 |
| 206 | EYGLFQ | 6 | 0     | 0.66 | 0.66 | -0.35 | 0.42 | -0.57 | 0.67 | -1 | 4     | 755.91 | no data | 0.63 | 0.42 |
| 207 | YGLFQI | 6 | 0.23  | 0.67 | 0.67 | 0.98  | 0.21 | -1.37 | 0.5  | 0  | 5.88  | 739.96 | no data | 0.67 | 0.65 |
| 208 | GLFQIS | 6 | 0.18  | 0.64 | 0.64 | 1.07  | 0.21 | -0.93 | 0.5  | 0  | 5.88  | 663.86 | no data | 0.67 | 0.95 |
| 209 | LFQISN | 6 | 0.05  | 0.65 | 0.65 | 0.55  | 0.21 | -0.9  | 0.83 | 0  | 5.88  | 720.91 | no data | 0.64 | 0.57 |
| 210 | FQISNK | 6 | -0.23 | 0.67 | 0.67 | -0.73 | 0.82 | -0.1  | 1.17 | 1  | 9.11  | 735.92 | no data | 0.52 | 0.37 |
| 211 | QISNKL | 6 | -0.24 | 0.65 | 0.65 | -0.57 | 0.82 | 0.02  | 1.17 | 1  | 9.11  | 701.91 | no data | 0.73 | 0.61 |
| 212 | ISNKLW | 6 | -0.06 | 0.62 | 0.62 | -0.13 | 0.61 | -0.58 | 1    | 1  | 9.11  | 759.99 | no data | 0.72 | 0.82 |
| 213 | SNKLWC | 6 | -0.18 | 0.6  | 0.6  | -0.47 | 0.61 | -0.45 | 1    | 1  | 8.57  | 749.96 | no data | 0.70 | 0.96 |
| 214 | NKLWCK | 6 | -0.32 | 0.63 | 0.63 | -0.98 | 1.22 | 0     | 1.17 | 2  | 9.36  | 791.06 | no data | 0.61 | 0.95 |
| 215 | KLWCKS | 6 | -0.25 | 0.59 | 0.59 | -0.53 | 1.22 | 0.02  | 1    | 2  | 9.36  | 764.03 | no data | 0.65 | 0.98 |
| 216 | LWCKSS | 6 | -0.11 | 0.57 | 0.57 | -0.02 | 0.61 | -0.43 | 0.83 | 1  | 8.57  | 722.93 | no data | 0.45 | 0.89 |
| 217 | WCKSSQ | 6 | -0.32 | 0.59 | 0.59 | -1.23 | 0.82 | -0.1  | 1.17 | 1  | 8.57  | 737.9  | no data | 0.44 | 0.92 |
| 218 | CKSSQV | 6 | -0.29 | 0.62 | 0.62 | -0.38 | 0.82 | 0.22  | 1    | 1  | 8.57  | 650.82 | no data | 0.44 | 0.50 |
| 219 | KSSQVP | 6 | -0.31 | 0.58 | 0.58 | -1.07 | 0.82 | 0.38  | 1    | 1  | 9.11  | 644.8  | no data | 0.69 | 0.22 |
| 220 | SSQVPQ | 6 | -0.24 | 0.58 | 0.58 | -1    | 0.42 | -0.08 | 1    | 0  | 5.88  | 644.76 | no data | 0.55 | 0.59 |
| 221 | SQVPQS | 6 | -0.24 | 0.58 | 0.58 | -1    | 0.42 | -0.08 | 1    | 0  | 5.88  | 644.76 | no data | 0.54 | 0.51 |
| 222 | QVPQSR | 6 | -0.49 | 0.61 | 0.61 | -1.62 | 0.83 | 0.37  | 1.5  | 1  | 10.11 | 713.87 | no data | 0.44 | 0.11 |
| 223 | VPQSRN | 6 | -0.48 | 0.62 | 0.62 | -1.62 | 0.62 | 0.37  | 1.5  | 1  | 10.11 | 699.84 | no data | 0.41 | 0.24 |
| 224 | PQSRNI | 6 | -0.45 | 0.62 | 0.62 | -1.57 | 0.62 | 0.32  | 1.5  | 1  | 10.11 | 713.87 | no data | 0.32 | 0.29 |
| 225 | QSRNIC | 6 | -0.43 | 0.66 | 0.66 | -0.88 | 0.62 | 0.15  | 1.5  | 1  | 8.6   | 719.89 | no data | 0.45 | 0.82 |
| 226 | SRNICD | 6 | -0.44 | 0.67 | 0.67 | -0.88 | 0.41 | 0.62  | 1.33 | 0  | 6.16  | 706.84 | no data | 0.53 | 0.78 |
| 227 | RNICDI | 6 | -0.27 | 0.7  | 0.7  | 0     | 0.41 | 0.27  | 1.17 | 0  | 6.16  | 732.93 | no data | 0.55 | 0.83 |
| 228 | NICDIS | 6 | -0.02 | 0.68 | 0.68 | 0.62  | 0    | -0.18 | 0.67 | -1 | 3.8   | 663.82 | no data | 0.53 | 0.90 |
| 229 | ICDISC | 6 | 0.09  | 0.66 | 0.66 | 1.62  | 0    | -0.38 | 0.33 | -1 | 3.8   | 652.85 | no data | 0.59 | 0.98 |
| 230 | CDISCD | 6 | -0.15 | 0.67 | 0.67 | 0.28  | 0    | 0.42  | 0.5  | -2 | 3.57  | 654.77 | no data | 0.56 | 0.67 |
| 231 | DISCDK | 6 | -0.34 | 0.67 | 0.67 | -0.78 | 0.61 | 1.08  | 0.83 | -1 | 4.21  | 679.81 | no data | 0.43 | 0.54 |
| 232 | ISCDKF | 6 | -0.12 | 0.67 | 0.67 | 0.27  | 0.61 | 0.17  | 0.67 | 0  | 6.16  | 711.9  | no data | 0.49 | 0.86 |
| 233 | SCDKFL | 6 | -0.15 | 0.64 | 0.64 | 0.15  | 0.61 | 0.17  | 0.67 | 0  | 6.16  | 711.9  | no data | 0.69 | 0.96 |
| 234 | CDKFLD | 6 | -0.23 | 0.67 | 0.67 | -0.3  | 0.61 | 0.62  | 0.67 | -1 | 4.21  | 739.91 | no data | 0.48 | 0.89 |
| 235 | DKFLDD | 6 | -0.35 | 0.7  | 0.7  | -1.3  | 0.61 | 1.28  | 0.83 | -2 | 3.94  | 751.86 | no data | 0.43 | 0.83 |
| 236 | KFLDDD | 6 | -0.35 | 0.7  | 0.7  | -1.3  | 0.61 | 1.28  | 0.83 | -2 | 3.94  | 751.86 | no data | 0.53 | 0.72 |
| 237 | FLDDDI | 6 | -0.05 | 0.7  | 0.7  | 0.1   | 0    | 0.48  | 0.5  | -3 | 3.43  | 736.85 | no data | 0.50 | 0.77 |
| 238 | LDDDDI | 6 | -0.18 | 0.67 | 0.67 | -0.48 | 0    | 0.83  | 0.67 | -3 | 3.43  | 690.78 | no data | 0.32 | 0.09 |
| 239 | DDDDIT | 6 | -0.39 | 0.71 | 0.71 | -1.7  | 0    | 1.63  | 0.83 | -4 | 3.33  | 692.7  | no data | 0.46 | 0.71 |
| 240 | DDITDD | 6 | -0.39 | 0.71 | 0.71 | -1.7  | 0    | 1.63  | 0.83 | -4 | 3.33  | 692.7  | no data | 0.46 | 0.81 |
| 241 | DITDDI | 6 | -0.15 | 0.7  | 0.7  | -0.37 | 0    | 0.83  | 0.67 | -3 | 3.43  | 690.78 | no data | 0.46 | 0.42 |
| 242 | ITDDIM | 6 | 0.02  | 0.71 | 0.71 | 0.53  | 0    | 0.12  | 0.5  | -2 | 3.57  | 706.89 | no data | 0.42 | 0.23 |
| 243 | TDDIMC | 6 | -0.1  | 0.69 | 0.69 | 0.2   | 0    | 0.25  | 0.5  | -2 | 3.57  | 696.86 | no data | 0.45 | 0.15 |
| 244 | DDIMCA | 6 | -0.03 | 0.69 | 0.69 | 0.62  | 0    | 0.23  | 0.33 | -2 | 3.57  | 666.83 | no data | 0.56 | 0.27 |
| 245 | DIMCAK | 6 | -0.09 | 0.68 | 0.68 | 0.55  | 0.61 | 0.23  | 0.5  | 0  | 6.16  | 679.92 | no data | 0.77 | 0.82 |
| 246 | IMCAKK | 6 | -0.15 | 0.66 | 0.66 | 0.48  | 1.22 | 0.23  | 0.67 | 2  | 9.36  | 693.01 | no data | 0.90 | 0.98 |
| 247 | MCAKKI | 6 | -0.15 | 0.66 | 0.66 | 0.48  | 1.22 | 0.23  | 0.67 | 2  | 9.36  | 693.01 | no data | 0.95 | 0.98 |
| 248 | CAKKIL | 6 | -0.11 | 0.62 | 0.62 | 0.8   | 1.22 | 0.15  | 0.67 | 2  | 9.36  | 674.98 | no data | 0.92 | 0.98 |
| 249 | AKKILD | 6 | -0.24 | 0.65 | 0.65 | -0.2  | 1.22 | 0.82  | 0.83 | 1  | 8.94  | 686.93 | no data | 0.78 | 0.95 |
| 250 | KKILDI | 6 | -0.16 | 0.67 | 0.67 | 0.25  | 1.22 | 0.6   | 0.83 | 1  | 8.94  | 729.02 | no data | 0.69 | 0.86 |
| 251 | KILDIK | 6 | -0.16 | 0.67 | 0.67 | 0.25  | 1.22 | 0.6   | 0.83 | 1  | 8.94  | 729.02 | no data | 0.65 | 0.84 |
| 252 | ILDIKG | 6 | 0.05  | 0.67 | 0.67 | 0.83  | 0.61 | 0.1   | 0.5  | 0  | 6.19  | 657.9  | no data | 0.38 | 0.71 |
| 253 | LDIKGI | 6 | 0.05  | 0.67 | 0.67 | 0.83  | 0.61 | 0.1   | 0.5  | 0  | 6.19  | 657.9  | no data | 0.34 | 0.56 |
| 254 | DIKIGD | 6 | -0.15 | 0.71 | 0.71 | -0.38 | 0.61 | 0.9   | 0.67 | -1 | 4.21  | 659.82 | no data | 0.40 | 0.58 |

|     |          |   |       |      |      |       |      |       |      |      |       |        |         |      |      |
|-----|----------|---|-------|------|------|-------|------|-------|------|------|-------|--------|---------|------|------|
| 255 | IKGIDY   | 6 | -0.03 | 0.7  | 0.7  | -0.02 | 0.61 | 0.02  | 0.67 | 0    | 6.18  | 707.91 | no data | 0.37 | 0.50 |
| 256 | KGIDYW   | 6 | -0.09 | 0.67 | 0.67 | -0.92 | 0.61 | -0.25 | 0.83 | 0    | 6.18  | 780.96 | no data | 0.50 | 0.33 |
| 257 | GIDYWL   | 6 | 0.18  | 0.65 | 0.65 | 0.37  | 0    | -1.05 | 0.5  | -1   | 3.8   | 765.95 | no data | 0.51 | 0.66 |
| 258 | IDYWLA   | 6 | 0.2   | 0.62 | 0.62 | 0.73  | 0    | -1.13 | 0.5  | -1   | 3.8   | 779.97 | no data | 0.71 | 0.90 |
| 259 | DYWLAH   | 6 | 0.01  | 0.5  | 0.5  | -0.55 | 0.24 | -0.92 | 0.67 | -0.5 | 5.09  | 803.95 | no data | 0.73 | 0.98 |
| 260 | YWLAHK   | 6 | -0.06 | 0.49 | 0.49 | -0.62 | 0.85 | -0.92 | 0.83 | 1.5  | 8.94  | 817.04 | no data | 0.73 | 0.98 |
| 261 | WLAHKA   | 6 | -0.02 | 0.46 | 0.46 | -0.1  | 0.85 | -0.62 | 0.67 | 1.5  | 9.11  | 724.94 | no data | 0.75 | 0.98 |
| 262 | LAHKAL   | 6 | 0.01  | 0.46 | 0.46 | 0.68  | 0.85 | -0.35 | 0.5  | 1.5  | 9.11  | 651.89 | no data | 0.91 | 0.96 |
| 263 | AHKALC   | 6 | -0.07 | 0.48 | 0.48 | 0.47  | 0.85 | -0.22 | 0.5  | 1.5  | 8.57  | 641.86 | no data | 0.77 | 0.96 |
| 264 | HKALCT   | 6 | -0.14 | 0.48 | 0.48 | 0.05  | 0.85 | -0.2  | 0.67 | 1.5  | 8.57  | 671.89 | no data | 0.77 | 0.91 |
| 265 | KALCTE   | 6 | -0.18 | 0.59 | 0.59 | 0     | 0.82 | 0.38  | 0.67 | 0    | 6.32  | 663.86 | no data | 0.75 | 0.97 |
| 266 | ALCTEK   | 6 | -0.18 | 0.59 | 0.59 | 0     | 0.82 | 0.38  | 0.67 | 0    | 6.32  | 663.86 | no data | 0.44 | 0.92 |
| 267 | LCTEKL   | 6 | -0.13 | 0.6  | 0.6  | 0.33  | 0.82 | 0.17  | 0.67 | 0    | 6.32  | 705.95 | no data | 0.37 | 0.76 |
| 268 | CTEKLE   | 6 | -0.33 | 0.62 | 0.62 | -0.88 | 1.03 | 0.97  | 0.83 | -1   | 4.54  | 721.9  | no data | 0.48 | 0.24 |
| 269 | TEKLEQ   | 6 | -0.45 | 0.63 | 0.63 | -1.88 | 1.24 | 1.17  | 1.17 | -1   | 4.54  | 746.9  | no data | 0.41 | 0.29 |
| 270 | EKLEQW   | 6 | -0.35 | 0.63 | 0.63 | -1.92 | 1.24 | 0.67  | 1.17 | -1   | 4.54  | 832.01 | no data | 0.44 | 0.26 |
| 271 | KLEQWL   | 6 | -0.16 | 0.6  | 0.6  | -0.7  | 1.03 | -0.13 | 1    | 0    | 6.35  | 816.06 | no data | 0.32 | 0.88 |
| 272 | LEQWLC   | 6 | 0.03  | 0.59 | 0.59 | 0.37  | 0.42 | -0.8  | 0.67 | -1   | 4     | 791.02 | no data | 0.10 | 0.88 |
| 273 | EQWLCE   | 6 | -0.17 | 0.62 | 0.62 | -0.85 | 0.63 | 0     | 0.83 | -2   | 3.8   | 806.97 | no data | 0.10 | 0.81 |
| 274 | QWLCEK   | 6 | -0.24 | 0.62 | 0.62 | -0.92 | 1.03 | 0     | 1    | 0    | 6.32  | 806.03 | no data | 0.10 | 0.61 |
| 275 | WLCEKL   | 6 | -0.04 | 0.59 | 0.59 | 0.3   | 0.82 | -0.33 | 0.67 | 0    | 6.32  | 791.06 | no data | 0.22 | 0.98 |
| 276 | MRFFVPL  | 7 | 0.1   | 0.64 | 0.64 | 1.34  | 0.35 | -0.94 | 0.57 | 1    | 10.11 | 909.25 | 0.99    | 0.70 | 0.93 |
| 277 | RFFVPLF  | 7 | 0.15  | 0.62 | 0.62 | 1.47  | 0.35 | -1.11 | 0.57 | 1    | 10.11 | 925.23 | 0.99    | 0.82 | 0.94 |
| 278 | FFVPLFL  | 7 | 0.48  | 0.6  | 0.6  | 2.66  | 0    | -1.8  | 0    | 0    | 5.88  | 882.21 | 0.86    | 0.76 | 0.98 |
| 279 | FVPLFLV  | 7 | 0.47  | 0.6  | 0.6  | 2.86  | 0    | -1.66 | 0    | 0    | 5.88  | 834.17 | 0.86    | 0.73 | 0.98 |
| 280 | VPLFLVG  | 7 | 0.41  | 0.6  | 0.6  | 2.4   | 0    | -1.3  | 0    | 0    | 5.88  | 744.05 | 0.99    | 0.67 | 0.98 |
| 281 | PLFLVGI  | 7 | 0.43  | 0.6  | 0.6  | 2.44  | 0    | -1.34 | 0    | 0    | 5.88  | 758.08 | 0.99    | 0.70 | 0.93 |
| 282 | LFVLGIL  | 7 | 0.52  | 0.62 | 0.62 | 3.21  | 0    | -1.6  | 0    | 0    | 5.88  | 774.13 | 0.97    | 0.64 | 0.98 |
| 283 | FLVGILF  | 7 | 0.53  | 0.65 | 0.65 | 3.07  | 0    | -1.7  | 0    | 0    | 5.88  | 808.14 | 0.86    | 0.64 | 0.98 |
| 284 | LVGILFP  | 7 | 0.43  | 0.6  | 0.6  | 2.44  | 0    | -1.34 | 0    | 0    | 5.88  | 758.08 | 0.99    | 0.49 | 0.90 |
| 285 | VGILFPA  | 7 | 0.39  | 0.6  | 0.6  | 2.16  | 0    | -1.16 | 0    | 0    | 5.88  | 715.99 | 0.99    | 0.66 | 0.98 |
| 286 | GILFPAI  | 7 | 0.42  | 0.6  | 0.6  | 2.2   | 0    | -1.2  | 0    | 0    | 5.88  | 730.02 | 0.98    | 0.57 | 0.98 |
| 287 | ILFPAIL  | 7 | 0.47  | 0.58 | 0.58 | 2.8   | 0    | -1.46 | 0    | 0    | 5.88  | 786.13 | 0.99    | 0.62 | 0.96 |
| 288 | LFPAILA  | 7 | 0.4   | 0.55 | 0.55 | 2.41  | 0    | -1.27 | 0    | 0    | 5.88  | 744.04 | 0.99    | 0.72 | 0.89 |
| 289 | FPAILAK  | 7 | 0.17  | 0.57 | 0.57 | 1.31  | 0.52 | -0.59 | 0.29 | 1    | 9.11  | 759.05 | 0.86    | 0.79 | 0.98 |
| 290 | PAILAKQ  | 7 | -0.01 | 0.57 | 0.57 | 0.41  | 0.7  | -0.2  | 0.57 | 1    | 9.11  | 740.01 | 0.99    | 0.74 | 0.98 |
| 291 | AILAKQF  | 7 | 0.08  | 0.62 | 0.62 | 1.04  | 0.7  | -0.56 | 0.57 | 1    | 9.11  | 790.07 | 0.61    | 0.69 | 0.98 |
| 292 | ILAKQFT  | 7 | 0.02  | 0.62 | 0.62 | 0.69  | 0.7  | -0.54 | 0.71 | 1    | 9.11  | 820.1  | 0.99    | 0.84 | 0.91 |
| 293 | LAKQFTK  | 7 | -0.24 | 0.62 | 0.62 | -0.51 | 1.23 | 0.14  | 1    | 2    | 10.02 | 835.11 | 0.99    | 0.85 | 0.93 |
| 294 | AKQFTKC  | 7 | -0.31 | 0.63 | 0.63 | -0.7  | 1.23 | 0.26  | 1    | 2    | 9.36  | 825.08 | 0.61    | 0.66 | 0.97 |
| 295 | KQFTKCE  | 7 | -0.43 | 0.65 | 0.65 | -1.46 | 1.41 | 0.76  | 1.14 | 1    | 8.54  | 883.12 | 0.99    | 0.40 | 0.69 |
| 296 | QFTKCEL  | 7 | -0.2  | 0.63 | 0.63 | -0.36 | 0.88 | 0.07  | 0.86 | 0    | 6.32  | 868.11 | 0.94    | 0.39 | 0.29 |
| 297 | FTKCELS  | 7 | -0.14 | 0.61 | 0.61 | 0.03  | 0.71 | 0.09  | 0.71 | 0    | 6.32  | 827.05 | 0.61    | 0.36 | 0.57 |
| 298 | TKCELSQ  | 7 | -0.33 | 0.61 | 0.61 | -0.87 | 0.88 | 0.47  | 1    | 0    | 6.32  | 808.01 | 0.99    | 0.43 | 0.53 |
| 299 | KCELSQL  | 7 | -0.22 | 0.61 | 0.61 | -0.23 | 0.88 | 0.27  | 0.86 | 0    | 6.32  | 820.07 | 0.99    | 0.23 | 0.48 |
| 300 | CELSQLL  | 7 | 0.01  | 0.59 | 0.59 | 0.87  | 0.36 | -0.41 | 0.57 | -1   | 4     | 805.06 | 0.61    | 0.30 | 0.97 |
| 301 | ELSQLLK  | 7 | -0.15 | 0.59 | 0.59 | -0.04 | 0.88 | 0.16  | 0.86 | 0    | 6.35  | 830.1  | 0.61    | 0.26 | 0.70 |
| 302 | LSQLLKD  | 7 | -0.17 | 0.61 | 0.61 | -0.04 | 0.7  | 0.16  | 0.86 | 0    | 6.19  | 816.07 | 0.99    | 0.27 | 0.77 |
| 303 | SQLLKDI  | 7 | -0.14 | 0.63 | 0.63 | 0.06  | 0.7  | 0.16  | 0.86 | 0    | 6.19  | 816.07 | 0.99    | 0.29 | 0.60 |
| 304 | QLLKDID  | 7 | -0.21 | 0.66 | 0.66 | -0.33 | 0.7  | 0.54  | 0.86 | -1   | 4.21  | 844.08 | 0.94    | 0.33 | 0.59 |
| 305 | LLKIDID  | 7 | -0.08 | 0.66 | 0.66 | 0.11  | 0.52 | 0.51  | 0.57 | -1   | 4.21  | 773    | 0.99    | 0.48 | 0.38 |
| 306 | LKIDIDGY | 7 | -0.16 | 0.69 | 0.69 | -0.61 | 0.52 | 0.44  | 0.71 | -1   | 4.21  | 823.01 | 0.99    | 0.41 | 0.07 |
| 307 | KDIDGYG  | 7 | -0.21 | 0.71 | 0.71 | -1.21 | 0.52 | 0.7   | 0.71 | -1   | 4.21  | 766.9  | 0.99    | 0.44 | 0.04 |
| 308 | DIDGYGG  | 7 | -0.03 | 0.71 | 0.71 | -0.71 | 0    | 0.27  | 0.43 | -2   | 3.57  | 695.78 | 0.61    | 0.54 | 0.48 |
| 309 | IDGYGGI  | 7 | 0.18  | 0.7  | 0.7  | 0.43  | 0    | -0.41 | 0.29 | -1   | 3.8   | 693.86 | 0.99    | 0.55 | 0.68 |
| 310 | DGYGGIA  | 7 | 0.11  | 0.67 | 0.67 | 0.04  | 0    | -0.23 | 0.29 | -1   | 3.8   | 651.77 | 0.61    | 0.59 | 0.60 |
| 311 | YGGGIAL  | 7 | 0.29  | 0.64 | 0.64 | 1.09  | 0    | -0.91 | 0.14 | 0    | 5.88  | 649.85 | 0.98    | 0.72 | 0.97 |
| 312 | YGGIALP  | 7 | 0.25  | 0.6  | 0.6  | 0.91  | 0    | -0.91 | 0.14 | 0    | 5.88  | 689.91 | 0.99    | 0.72 | 0.94 |
| 313 | GGIALPE  | 7 | 0.16  | 0.59 | 0.59 | 0.6   | 0.18 | -0.16 | 0.14 | -1   | 4     | 655.85 | 0.98    | 0.73 | 0.93 |
| 314 | GIALPEL  | 7 | 0.22  | 0.57 | 0.57 | 1.2   | 0.18 | -0.41 | 0.14 | -1   | 4     | 711.96 | 0.98    | 0.69 | 0.77 |
| 315 | IALPELI  | 7 | 0.3   | 0.57 | 0.57 | 1.9   | 0.18 | -0.67 | 0.14 | -1   | 4     | 768.07 | 0.99    | 0.67 | 0.78 |
| 316 | ALPELIC  | 7 | 0.2   | 0.56 | 0.56 | 1.61  | 0.18 | -0.56 | 0.14 | -1   | 4     | 758.04 | 0.61    | 0.69 | 0.81 |
| 317 | LPELICT  | 7 | 0.14  | 0.56 | 0.56 | 1.26  | 0.18 | -0.54 | 0.29 | -1   | 4     | 788.07 | 0.99    | 0.57 | 0.53 |
| 318 | PELICTM  | 7 | 0.1   | 0.6  | 0.6  | 0.99  | 0.18 | -0.47 | 0.29 | -1   | 4     | 806.1  | 0.94    | 0.53 | 0.58 |

|     |          |   |       |      |      |       |      |       |      |      |       |        |      |      |      |
|-----|----------|---|-------|------|------|-------|------|-------|------|------|-------|--------|------|------|------|
| 319 | ELICTMF  | 7 | 0.2   | 0.65 | 0.65 | 1.61  | 0.18 | -0.83 | 0.29 | -1   | 4     | 856.16 | 0.61 | 0.50 | 0.26 |
| 320 | LICTMFH  | 7 | 0.23  | 0.55 | 0.55 | 1.66  | 0.21 | -1.33 | 0.29 | 0.5  | 7.06  | 864.19 | 0.99 | 0.62 | 0.95 |
| 321 | ICTMFHT  | 7 | 0.13  | 0.55 | 0.55 | 1.01  | 0.21 | -1.13 | 0.43 | 0.5  | 7.06  | 852.13 | 0.99 | 0.64 | 0.97 |
| 322 | CTMFHTS  | 7 | -0.02 | 0.53 | 0.53 | 0.26  | 0.21 | -0.83 | 0.57 | 0.5  | 7.06  | 826.04 | 0.61 | 0.58 | 0.94 |
| 323 | TMFHTSG  | 7 | 0     | 0.54 | 0.54 | -0.16 | 0.21 | -0.69 | 0.57 | 0.5  | 7.1   | 779.96 | 0.99 | 0.40 | 0.77 |
| 324 | MFHTSGY  | 7 | 0.03  | 0.56 | 0.56 | -0.24 | 0.21 | -0.96 | 0.57 | 0.5  | 7.09  | 842.03 | 0.99 | 0.34 | 0.20 |
| 325 | FHTSGYD  | 7 | -0.11 | 0.56 | 0.56 | -1.01 | 0.21 | -0.34 | 0.71 | -0.5 | 5.09  | 825.92 | 0.61 | 0.33 | 0.24 |
| 326 | HTSGYDT  | 7 | -0.22 | 0.53 | 0.53 | -1.51 | 0.21 | -0.04 | 0.86 | -0.5 | 5.09  | 779.85 | 0.99 | 0.26 | 0.21 |
| 327 | TSGYDTQ  | 7 | -0.26 | 0.63 | 0.63 | -1.56 | 0.18 | 0.06  | 1    | -1   | 3.8   | 770.84 | 0.99 | 0.24 | 0.18 |
| 328 | SGYDTQA  | 7 | -0.2  | 0.63 | 0.63 | -1.2  | 0.18 | 0.04  | 0.86 | -1   | 3.8   | 740.81 | 0.99 | 0.28 | 0.14 |
| 329 | GYDTQAI  | 7 | -0.06 | 0.65 | 0.65 | -0.44 | 0.18 | -0.26 | 0.71 | -1   | 3.8   | 766.9  | 0.98 | 0.35 | 0.12 |
| 330 | YDTQAIV  | 7 | -0.01 | 0.66 | 0.66 | 0.21  | 0.18 | -0.47 | 0.71 | -1   | 3.8   | 808.98 | 0.99 | 0.44 | 0.22 |
| 331 | DTQAIVE  | 7 | -0.1  | 0.65 | 0.65 | -0.1  | 0.36 | 0.29  | 0.71 | -2   | 3.67  | 774.92 | 0.61 | 0.52 | 0.15 |
| 332 | TQAIVEN  | 7 | -0.09 | 0.65 | 0.65 | -0.1  | 0.36 | -0.11 | 0.86 | -1   | 4     | 773.94 | 0.99 | 0.57 | 0.43 |
| 333 | QAIVENN  | 7 | -0.15 | 0.69 | 0.69 | -0.5  | 0.36 | -0.03 | 1    | -1   | 4     | 786.94 | 0.99 | 0.52 | 0.32 |
| 334 | AIVENNE  | 7 | -0.14 | 0.69 | 0.69 | -0.5  | 0.36 | 0.37  | 0.86 | -2   | 3.8   | 787.92 | 0.61 | 0.44 | 0.29 |
| 335 | IVENNES  | 7 | -0.22 | 0.69 | 0.69 | -0.87 | 0.36 | 0.49  | 1    | -2   | 3.8   | 803.92 | 0.94 | 0.52 | 0.13 |
| 336 | VENNEST  | 7 | -0.35 | 0.66 | 0.66 | -1.61 | 0.36 | 0.69  | 1.14 | -2   | 3.8   | 791.86 | 0.99 | 0.39 | 0.14 |
| 337 | ENNESTE  | 7 | -0.51 | 0.66 | 0.66 | -2.71 | 0.54 | 1.33  | 1.29 | -3   | 3.68  | 821.84 | 0.61 | 0.30 | 0.36 |
| 338 | NNESTEY  | 7 | -0.42 | 0.66 | 0.66 | -2.4  | 0.36 | 0.57  | 1.29 | -2   | 3.8   | 855.9  | 0.94 | 0.28 | 0.29 |
| 339 | NESTEYG  | 7 | -0.31 | 0.65 | 0.65 | -1.96 | 0.36 | 0.54  | 1    | -2   | 3.8   | 798.85 | 0.99 | 0.32 | 0.07 |
| 340 | ESTEYGL  | 7 | -0.14 | 0.62 | 0.62 | -0.91 | 0.36 | 0.26  | 0.71 | -2   | 3.8   | 797.91 | 0.61 | 0.42 | 0.17 |
| 341 | STEYGLF  | 7 | 0.04  | 0.62 | 0.62 | -0.01 | 0.18 | -0.53 | 0.57 | -1   | 4     | 815.97 | 0.99 | 0.54 | 0.23 |
| 342 | TEYGLFQ  | 7 | -0.02 | 0.64 | 0.64 | -0.4  | 0.36 | -0.54 | 0.71 | -1   | 4     | 857.03 | 0.99 | 0.55 | 0.25 |
| 343 | EYGLFQI  | 7 | 0.11  | 0.67 | 0.67 | 0.34  | 0.36 | -0.74 | 0.57 | -1   | 4     | 869.09 | 0.61 | 0.65 | 0.29 |
| 344 | YGLFQIS  | 7 | 0.16  | 0.65 | 0.65 | 0.73  | 0.18 | -1.13 | 0.57 | 0    | 5.88  | 827.05 | 0.99 | 0.66 | 0.78 |
| 345 | GLFQISN  | 7 | 0.06  | 0.65 | 0.65 | 0.41  | 0.18 | -0.77 | 0.71 | 0    | 5.88  | 777.98 | 0.98 | 0.62 | 0.79 |
| 346 | LFQISNK  | 7 | -0.12 | 0.65 | 0.65 | -0.09 | 0.7  | -0.34 | 1    | 1    | 9.11  | 849.1  | 0.94 | 0.63 | 0.70 |
| 347 | FQISNKL  | 7 | -0.12 | 0.65 | 0.65 | -0.09 | 0.7  | -0.34 | 1    | 1    | 9.11  | 849.1  | 0.61 | 0.67 | 0.87 |
| 348 | QISNKLW  | 7 | -0.15 | 0.63 | 0.63 | -0.61 | 0.7  | -0.47 | 1.14 | 1    | 9.11  | 888.14 | 0.99 | 0.72 | 0.85 |
| 349 | ISNKLWC  | 7 | -0.05 | 0.62 | 0.62 | 0.24  | 0.52 | -0.64 | 0.86 | 1    | 8.57  | 863.14 | 0.99 | 0.72 | 0.95 |
| 350 | SNKLWCK  | 7 | -0.31 | 0.61 | 0.61 | -0.96 | 1.05 | 0.04  | 1.14 | 2    | 9.36  | 878.15 | 0.99 | 0.59 | 0.94 |
| 351 | NKLWCKS  | 7 | -0.31 | 0.61 | 0.61 | -0.96 | 1.05 | 0.04  | 1.14 | 2    | 9.36  | 878.15 | 0.99 | 0.61 | 0.91 |
| 352 | KLWCKSS  | 7 | -0.25 | 0.58 | 0.58 | -0.57 | 1.05 | 0.06  | 1    | 2    | 9.36  | 851.12 | 0.99 | 0.62 | 0.97 |
| 353 | LWCKSSQ  | 7 | -0.2  | 0.58 | 0.58 | -0.51 | 0.7  | -0.34 | 1    | 1    | 8.57  | 851.08 | 0.99 | 0.49 | 0.91 |
| 354 | WCKSSQV  | 7 | -0.19 | 0.61 | 0.61 | -0.46 | 0.7  | -0.3  | 1    | 1    | 8.57  | 837.05 | 0.99 | 0.49 | 0.85 |
| 355 | CKSSQVP  | 7 | -0.26 | 0.59 | 0.59 | -0.56 | 0.7  | 0.19  | 0.86 | 1    | 8.57  | 747.95 | 0.61 | 0.48 | 0.54 |
| 356 | KSSQVPQ  | 7 | -0.36 | 0.59 | 0.59 | -1.41 | 0.88 | 0.36  | 1.14 | 1    | 9.11  | 772.95 | 0.99 | 0.60 | 0.16 |
| 357 | SSQVPQS  | 7 | -0.24 | 0.57 | 0.57 | -0.97 | 0.36 | -0.03 | 1    | 0    | 5.88  | 731.85 | 0.99 | 0.53 | 0.45 |
| 358 | SQVPQSR  | 7 | -0.46 | 0.59 | 0.59 | -1.5  | 0.71 | 0.36  | 1.43 | 1    | 10.11 | 800.96 | 0.99 | 0.46 | 0.07 |
| 359 | QVPQSRN  | 7 | -0.51 | 0.63 | 0.63 | -1.89 | 0.71 | 0.34  | 1.57 | 1    | 10.11 | 827.99 | 0.99 | 0.44 | 0.13 |
| 360 | VPQSRNI  | 7 | -0.31 | 0.63 | 0.63 | -0.74 | 0.53 | 0.06  | 1.29 | 1    | 10.11 | 813.02 | 0.99 | 0.38 | 0.16 |
| 361 | PQSRNIC  | 7 | -0.38 | 0.62 | 0.62 | -0.99 | 0.53 | 0.13  | 1.29 | 1    | 8.6   | 817.02 | 0.94 | 0.34 | 0.81 |
| 362 | QSRNICD  | 7 | -0.47 | 0.68 | 0.68 | -1.26 | 0.53 | 0.56  | 1.43 | 0    | 6.16  | 834.99 | 0.99 | 0.48 | 0.24 |
| 363 | SRNICDI  | 7 | -0.27 | 0.68 | 0.68 | -0.11 | 0.35 | 0.27  | 1.14 | 0    | 6.16  | 820.02 | 0.99 | 0.52 | 0.73 |
| 364 | RNICDIS  | 7 | -0.27 | 0.68 | 0.68 | -0.11 | 0.35 | 0.27  | 1.14 | 0    | 6.16  | 820.02 | 0.99 | 0.56 | 0.87 |
| 365 | NICDISC  | 7 | -0.01 | 0.67 | 0.67 | 0.89  | 0    | -0.3  | 0.57 | -1   | 3.8   | 766.97 | 0.99 | 0.54 | 0.97 |
| 366 | ICDISCD  | 7 | -0.02 | 0.67 | 0.67 | 0.89  | 0    | 0.1   | 0.43 | -2   | 3.57  | 767.95 | 0.99 | 0.59 | 0.86 |
| 367 | CDISCDK  | 7 | -0.28 | 0.67 | 0.67 | -0.31 | 0.52 | 0.79  | 0.71 | -1   | 4.21  | 782.96 | 0.61 | 0.43 | 0.67 |
| 368 | DISCDKF  | 7 | -0.2  | 0.68 | 0.68 | -0.27 | 0.52 | 0.57  | 0.71 | -1   | 4.21  | 827    | 0.61 | 0.49 | 0.46 |
| 369 | ISCDKFL  | 7 | -0.02 | 0.65 | 0.65 | 0.77  | 0.52 | -0.11 | 0.57 | 0    | 6.16  | 825.08 | 0.99 | 0.67 | 0.87 |
| 370 | SCDKFLD  | 7 | -0.23 | 0.65 | 0.65 | -0.37 | 0.52 | 0.57  | 0.71 | -1   | 4.21  | 827    | 0.99 | 0.47 | 0.88 |
| 371 | CDKFLDD  | 7 | -0.3  | 0.69 | 0.69 | -0.76 | 0.52 | 0.96  | 0.71 | -2   | 3.94  | 855.01 | 0.61 | 0.44 | 0.63 |
| 372 | DKFLDDD  | 7 | -0.41 | 0.71 | 0.71 | -1.61 | 0.52 | 1.53  | 0.86 | -3   | 3.77  | 866.96 | 0.61 | 0.43 | 0.75 |
| 373 | KFLDDDI  | 7 | -0.2  | 0.7  | 0.7  | -0.47 | 0.52 | 0.84  | 0.71 | -2   | 3.94  | 865.04 | 0.99 | 0.53 | 0.46 |
| 374 | FLDDDDIT | 7 | -0.07 | 0.68 | 0.68 | -0.01 | 0    | 0.36  | 0.57 | -3   | 3.43  | 837.97 | 0.61 | 0.51 | 0.06 |
| 375 | LDDDDITD | 7 | -0.26 | 0.69 | 0.69 | -0.91 | 0    | 1.14  | 0.71 | -4   | 3.33  | 805.88 | 0.99 | 0.28 | 0.16 |
| 376 | DDDDITDD | 7 | -0.44 | 0.72 | 0.72 | -1.96 | 0    | 1.83  | 0.86 | -5   | 3.25  | 807.8  | 0.61 | 0.46 | 0.77 |
| 377 | DDITDDI  | 7 | -0.23 | 0.71 | 0.71 | -0.81 | 0    | 1.14  | 0.71 | -4   | 3.33  | 805.88 | 0.61 | 0.46 | 0.40 |
| 378 | DITDDIM  | 7 | -0.09 | 0.71 | 0.71 | -0.04 | 0    | 0.53  | 0.57 | -3   | 3.43  | 821.99 | 0.61 | 0.42 | 0.13 |
| 379 | ITDDIMC  | 7 | 0.02  | 0.69 | 0.69 | 0.81  | 0    | -0.04 | 0.43 | -2   | 3.57  | 810.04 | 0.99 | 0.48 | 0.19 |
| 380 | DDIMCAK  | 7 | -0.05 | 0.67 | 0.67 | 0.43  | 0    | 0.14  | 0.43 | -2   | 3.57  | 767.95 | 0.99 | 0.49 | 0.07 |
| 381 | DDIMCAK  | 7 | -0.18 | 0.69 | 0.69 | -0.03 | 0.52 | 0.63  | 0.57 | -1   | 4.21  | 795.02 | 0.61 | 0.75 | 0.17 |
| 382 | DIMCAKK  | 7 | -0.23 | 0.68 | 0.68 | -0.09 | 1.05 | 0.63  | 0.71 | 1    | 8.54  | 808.11 | 0.61 | 0.86 | 0.96 |



|     |           |   |       |      |      |       |      |       |      |      |       |         |      |      |      |
|-----|-----------|---|-------|------|------|-------|------|-------|------|------|-------|---------|------|------|------|
| 383 | IMCAKKI   | 7 | -0.03 | 0.67 | 0.67 | 1.06  | 1.05 | -0.06 | 0.57 | 2    | 9.36  | 806.19  | 0.99 | 0.89 | 0.98 |
| 384 | MCAKKIL   | 7 | -0.06 | 0.64 | 0.64 | 0.96  | 1.05 | -0.06 | 0.57 | 2    | 9.36  | 806.19  | 0.99 | 0.91 | 0.98 |
| 385 | CAKKILD   | 7 | -0.2  | 0.64 | 0.64 | 0.19  | 1.05 | 0.56  | 0.71 | 1    | 8.54  | 790.08  | 0.83 | 0.78 | 0.97 |
| 386 | AKKILDI   | 7 | -0.1  | 0.65 | 0.65 | 0.47  | 1.05 | 0.44  | 0.71 | 1    | 8.94  | 800.11  | 0.61 | 0.77 | 0.86 |
| 387 | KKILDIK   | 7 | -0.29 | 0.68 | 0.68 | -0.34 | 1.57 | 0.94  | 1    | 2    | 9.72  | 857.21  | 0.99 | 0.68 | 0.88 |
| 388 | KILDIKG   | 7 | -0.11 | 0.68 | 0.68 | 0.16  | 1.05 | 0.51  | 0.71 | 1    | 8.94  | 786.09  | 0.99 | 0.49 | 0.80 |
| 389 | ILDIKGI   | 7 | 0.15  | 0.68 | 0.68 | 1.36  | 0.52 | -0.17 | 0.43 | 0    | 6.19  | 771.08  | 0.99 | 0.33 | 0.65 |
| 390 | LDIKGID   | 7 | -0.06 | 0.69 | 0.69 | 0.21  | 0.52 | 0.51  | 0.57 | -1   | 4.21  | 773     | 0.99 | 0.29 | 0.45 |
| 391 | DIKGIDY   | 7 | -0.13 | 0.71 | 0.71 | -0.51 | 0.52 | 0.44  | 0.71 | -1   | 4.21  | 823.01  | 0.61 | 0.38 | 0.25 |
| 392 | IKGIDYW   | 7 | 0.03  | 0.67 | 0.67 | -0.14 | 0.52 | -0.47 | 0.71 | 0    | 6.18  | 894.14  | 0.99 | 0.53 | 0.47 |
| 393 | KGIDYWL   | 7 | 0     | 0.65 | 0.65 | -0.24 | 0.52 | -0.47 | 0.71 | 0    | 6.18  | 894.14  | 0.99 | 0.42 | 0.47 |
| 394 | GIDYWLA   | 7 | 0.19  | 0.63 | 0.63 | 0.19  | 0    | -0.97 | 0.43 | -1   | 3.8   | 837.04  | 0.98 | 0.71 | 0.75 |
| 395 | IDYWLAH   | 7 | 0.11  | 0.53 | 0.53 | 0.17  | 0.21 | -1.04 | 0.57 | -0.5 | 5.09  | 917.13  | 0.99 | 0.72 | 0.84 |
| 396 | DYWLAHK   | 7 | -0.15 | 0.53 | 0.53 | -1.03 | 0.73 | -0.36 | 0.86 | 0.5  | 7.09  | 932.14  | 0.61 | 0.74 | 0.98 |
| 397 | YWLAHKA   | 7 | -0.01 | 0.49 | 0.49 | -0.27 | 0.73 | -0.86 | 0.71 | 1.5  | 8.94  | 888.13  | 0.99 | 0.86 | 0.98 |
| 398 | WLAHKAL   | 7 | 0.06  | 0.47 | 0.47 | 0.46  | 0.73 | -0.79 | 0.57 | 1.5  | 9.11  | 838.12  | 0.99 | 0.83 | 0.98 |
| 399 | LAHKALC   | 7 | 0.01  | 0.49 | 0.49 | 0.94  | 0.73 | -0.44 | 0.43 | 1.5  | 8.57  | 755.04  | 0.99 | 0.85 | 0.92 |
| 400 | AHKALCT   | 7 | -0.09 | 0.49 | 0.49 | 0.3   | 0.73 | -0.24 | 0.57 | 1.5  | 8.57  | 742.98  | 0.61 | 0.75 | 0.93 |
| 401 | HKALCTE   | 7 | -0.21 | 0.51 | 0.51 | -0.46 | 0.91 | 0.26  | 0.71 | 0.5  | 7.06  | 801.02  | 0.99 | 0.72 | 0.94 |
| 402 | KALCTEK   | 7 | -0.31 | 0.61 | 0.61 | -0.56 | 1.23 | 0.76  | 0.86 | 1    | 8.54  | 792.05  | 0.99 | 0.69 | 0.82 |
| 403 | ALCTEKL   | 7 | -0.08 | 0.58 | 0.58 | 0.54  | 0.71 | 0.07  | 0.57 | 0    | 6.32  | 777.04  | 0.61 | 0.50 | 0.93 |
| 404 | LCTEKLE   | 7 | -0.2  | 0.61 | 0.61 | -0.21 | 0.89 | 0.57  | 0.71 | -1   | 4.54  | 835.08  | 0.99 | 0.35 | 0.52 |
| 405 | CTEKLEQ   | 7 | -0.38 | 0.63 | 0.63 | -1.26 | 1.07 | 0.86  | 1    | -1   | 4.54  | 850.05  | 0.86 | 0.40 | 0.25 |
| 406 | TEKLEQW   | 7 | -0.33 | 0.61 | 0.61 | -1.74 | 1.07 | 0.51  | 1.14 | -1   | 4.54  | 933.13  | 0.99 | 0.36 | 0.30 |
| 407 | EKLEQWL   | 7 | -0.23 | 0.61 | 0.61 | -1.1  | 1.07 | 0.31  | 1    | -1   | 4.54  | 945.19  | 0.61 | 0.25 | 0.39 |
| 408 | KLEQWLC   | 7 | -0.13 | 0.6  | 0.6  | -0.24 | 0.88 | -0.26 | 0.86 | 0    | 6.32  | 919.21  | 0.99 | 0.20 | 0.96 |
| 409 | LEQWLCE   | 7 | -0.07 | 0.6  | 0.6  | -0.19 | 0.54 | -0.26 | 0.71 | -2   | 3.8   | 920.15  | 0.99 | 0.10 | 0.81 |
| 410 | EQWLCEK   | 7 | -0.3  | 0.62 | 0.62 | -1.29 | 1.07 | 0.43  | 1    | -1   | 4.54  | 935.16  | 0.61 | 0.08 | 0.19 |
| 411 | QWLCEKL   | 7 | -0.13 | 0.6  | 0.6  | -0.24 | 0.88 | -0.26 | 0.86 | 0    | 6.32  | 919.21  | 0.99 | 0.16 | 0.96 |
| 412 | MRFFVPLF  | 8 | 0.17  | 0.64 | 0.64 | 1.52  | 0.31 | -1.14 | 0.5  | 1    | 10.11 | 1056.44 | 0.99 | 0.79 | 0.97 |
| 413 | RFFVPLFL  | 8 | 0.2   | 0.61 | 0.61 | 1.76  | 0.31 | -1.2  | 0.5  | 1    | 10.11 | 1038.41 | 0.99 | 0.76 | 0.94 |
| 414 | FFVPLFLV  | 8 | 0.49  | 0.61 | 0.61 | 2.85  | 0    | -1.76 | 0    | 0    | 5.88  | 981.36  | 0.86 | 0.75 | 0.95 |
| 415 | FVPLFLVG  | 8 | 0.43  | 0.61 | 0.61 | 2.45  | 0    | -1.45 | 0    | 0    | 5.88  | 891.24  | 0.86 | 0.72 | 0.98 |
| 416 | VPLFLVGI  | 8 | 0.45  | 0.61 | 0.61 | 2.66  | 0    | -1.36 | 0    | 0    | 5.88  | 857.23  | 0.99 | 0.67 | 0.87 |
| 417 | PLFLVGIL  | 8 | 0.45  | 0.59 | 0.59 | 2.61  | 0    | -1.4  | 0    | 0    | 5.88  | 871.26  | 0.99 | 0.72 | 0.98 |
| 418 | LFLVGILF  | 8 | 0.53  | 0.63 | 0.63 | 3.16  | 0    | -1.71 | 0    | 0    | 5.88  | 921.32  | 0.97 | 0.64 | 0.80 |
| 419 | FLVGILFP  | 8 | 0.46  | 0.61 | 0.61 | 2.49  | 0    | -1.49 | 0    | 0    | 5.88  | 905.27  | 0.86 | 0.64 | 0.98 |
| 420 | LVGILFPA  | 8 | 0.41  | 0.59 | 0.59 | 2.36  | 0    | -1.24 | 0    | 0    | 5.88  | 829.17  | 0.99 | 0.55 | 0.80 |
| 421 | VGILFPAI  | 8 | 0.44  | 0.61 | 0.61 | 2.45  | 0    | -1.24 | 0    | 0    | 5.88  | 829.17  | 0.99 | 0.53 | 0.98 |
| 422 | GILFPAIL  | 8 | 0.43  | 0.59 | 0.59 | 2.4   | 0    | -1.28 | 0    | 0    | 5.88  | 843.2   | 0.98 | 0.57 | 0.98 |
| 423 | ILFPAILA  | 8 | 0.44  | 0.57 | 0.57 | 2.68  | 0    | -1.34 | 0    | 0    | 5.88  | 857.22  | 0.99 | 0.72 | 0.96 |
| 424 | LFPAILAK  | 8 | 0.22  | 0.57 | 0.57 | 1.63  | 0.46 | -0.74 | 0.25 | 1    | 9.11  | 872.23  | 0.99 | 0.81 | 0.98 |
| 425 | FPAILAKQ  | 8 | 0.06  | 0.59 | 0.59 | 0.71  | 0.61 | -0.49 | 0.5  | 1    | 9.11  | 887.2   | 0.86 | 0.72 | 0.98 |
| 426 | PAILAKQF  | 8 | 0.06  | 0.59 | 0.59 | 0.71  | 0.61 | -0.49 | 0.5  | 1    | 9.11  | 887.2   | 0.99 | 0.71 | 0.98 |
| 427 | AILAKQFT  | 8 | 0.05  | 0.61 | 0.61 | 0.82  | 0.61 | -0.54 | 0.62 | 1    | 9.11  | 891.19  | 0.61 | 0.68 | 0.95 |
| 428 | ILAKQFTK  | 8 | -0.12 | 0.63 | 0.63 | 0.11  | 1.07 | -0.1  | 0.88 | 2    | 10.02 | 948.29  | 0.99 | 0.83 | 0.89 |
| 429 | LAKQFTKC  | 8 | -0.21 | 0.62 | 0.62 | -0.14 | 1.07 | 0     | 0.88 | 2    | 9.36  | 938.26  | 0.99 | 0.80 | 0.93 |
| 430 | AKQFTKCE  | 8 | -0.35 | 0.64 | 0.64 | -1.05 | 1.23 | 0.6   | 1    | 1    | 8.54  | 954.21  | 0.61 | 0.66 | 0.69 |
| 431 | KQFTKCEL  | 8 | -0.31 | 0.64 | 0.64 | -0.8  | 1.23 | 0.44  | 1    | 1    | 8.54  | 996.3   | 0.99 | 0.41 | 0.39 |
| 432 | QFTKCELS  | 8 | -0.21 | 0.62 | 0.62 | -0.41 | 0.77 | 0.1   | 0.88 | 0    | 6.32  | 955.2   | 0.94 | 0.36 | 0.18 |
| 433 | FTKCELSQ  | 8 | -0.21 | 0.62 | 0.62 | -0.41 | 0.77 | 0.1   | 0.88 | 0    | 6.32  | 955.2   | 0.61 | 0.39 | 0.54 |
| 434 | TKCELSQL  | 8 | -0.22 | 0.6  | 0.6  | -0.29 | 0.77 | 0.19  | 0.88 | 0    | 6.32  | 921.19  | 0.99 | 0.30 | 0.33 |
| 435 | KCELSQLL  | 8 | -0.13 | 0.6  | 0.6  | 0.27  | 0.77 | 0.01  | 0.75 | 0    | 6.32  | 933.25  | 0.99 | 0.27 | 0.89 |
| 436 | CELSQLLK  | 8 | -0.13 | 0.6  | 0.6  | 0.27  | 0.77 | 0.01  | 0.75 | 0    | 6.32  | 933.25  | 0.61 | 0.24 | 0.66 |
| 437 | ELSQLLKD  | 8 | -0.23 | 0.61 | 0.61 | -0.48 | 0.77 | 0.51  | 0.88 | -1   | 4.38  | 945.2   | 0.61 | 0.22 | 0.56 |
| 438 | LSQLLKDI  | 8 | -0.06 | 0.62 | 0.62 | 0.52  | 0.61 | -0.09 | 0.75 | 0    | 6.19  | 929.25  | 0.99 | 0.27 | 0.69 |
| 439 | SQLLKDID  | 8 | -0.21 | 0.65 | 0.65 | -0.39 | 0.61 | 0.51  | 0.88 | -1   | 4.21  | 931.17  | 0.99 | 0.29 | 0.48 |
| 440 | QLLKDIDG  | 8 | -0.16 | 0.66 | 0.66 | -0.34 | 0.61 | 0.47  | 0.75 | -1   | 4.21  | 901.15  | 0.94 | 0.31 | 0.15 |
| 441 | LLKIDIDGY | 8 | -0.07 | 0.67 | 0.67 | -0.06 | 0.46 | 0.16  | 0.62 | -1   | 4.21  | 936.19  | 0.99 | 0.43 | 0.14 |
| 442 | LKDIDGYG  | 8 | -0.12 | 0.69 | 0.69 | -0.59 | 0.46 | 0.39  | 0.62 | -1   | 4.21  | 880.08  | 0.99 | 0.41 | 0.04 |
| 443 | KDIDGYGG  | 8 | -0.16 | 0.7  | 0.7  | -1.11 | 0.46 | 0.61  | 0.62 | -1   | 4.21  | 823.97  | 0.99 | 0.42 | 0.06 |
| 444 | DIDGYGGI  | 8 | 0.07  | 0.71 | 0.71 | -0.06 | 0    | 0.01  | 0.38 | -2   | 3.57  | 808.96  | 0.61 | 0.49 | 0.24 |
| 445 | IDGYGGIA  | 8 | 0.19  | 0.68 | 0.68 | 0.6   | 0    | -0.42 | 0.25 | -1   | 3.8   | 764.95  | 0.99 | 0.58 | 0.54 |
| 446 | DGYGGIAL  | 8 | 0.16  | 0.66 | 0.66 | 0.51  | 0    | -0.42 | 0.25 | -1   | 3.8   | 764.95  | 0.61 | 0.68 | 0.53 |

|     |          |   |       |      |      |       |      |       |      |       |       |         |      |      |      |
|-----|----------|---|-------|------|------|-------|------|-------|------|-------|-------|---------|------|------|------|
| 447 | GYGGIALP | 8 | 0.24  | 0.61 | 0.61 | 0.75  | 0    | -0.8  | 0.12 | 0     | 5.88  | 746.98  | 0.98 | 0.70 | 0.95 |
| 448 | YGGIALPE | 8 | 0.14  | 0.61 | 0.61 | 0.36  | 0.16 | -0.42 | 0.25 | -1    | 4     | 819.04  | 0.99 | 0.71 | 0.59 |
| 449 | GGIALPEL | 8 | 0.21  | 0.59 | 0.59 | 1     | 0.16 | -0.36 | 0.12 | -1    | 4     | 769.03  | 0.98 | 0.66 | 0.91 |
| 450 | GIALPELI | 8 | 0.28  | 0.59 | 0.59 | 1.61  | 0.16 | -0.59 | 0.12 | -1    | 4     | 825.14  | 0.98 | 0.68 | 0.84 |
| 451 | IALPELIC | 8 | 0.27  | 0.58 | 0.58 | 1.98  | 0.16 | -0.71 | 0.12 | -1    | 4     | 871.22  | 0.99 | 0.66 | 0.86 |
| 452 | ALPELICT | 8 | 0.15  | 0.56 | 0.56 | 1.32  | 0.16 | -0.54 | 0.25 | -1    | 4     | 859.16  | 0.61 | 0.65 | 0.55 |
| 453 | LPELICTM | 8 | 0.15  | 0.59 | 0.59 | 1.34  | 0.16 | -0.64 | 0.25 | -1    | 4     | 919.28  | 0.99 | 0.60 | 0.59 |
| 454 | PELICTMF | 8 | 0.16  | 0.61 | 0.61 | 1.21  | 0.16 | -0.72 | 0.25 | -1    | 4     | 953.29  | 0.94 | 0.50 | 0.14 |
| 455 | ELICTMFH | 8 | 0.12  | 0.57 | 0.57 | 1.01  | 0.34 | -0.79 | 0.38 | -0.5  | 5.25  | 993.32  | 0.61 | 0.55 | 0.17 |
| 456 | LICTMFHT | 8 | 0.18  | 0.55 | 0.55 | 1.36  | 0.18 | -1.21 | 0.38 | 0.5   | 7.06  | 965.31  | 0.99 | 0.63 | 0.95 |
| 457 | ICTMFHTS | 8 | 0.08  | 0.55 | 0.55 | 0.79  | 0.18 | -0.95 | 0.5  | 0.5   | 7.06  | 939.22  | 0.99 | 0.58 | 0.98 |
| 458 | CTMFHTSG | 8 | 0.01  | 0.55 | 0.55 | 0.17  | 0.18 | -0.73 | 0.5  | 0.5   | 7.06  | 883.11  | 0.61 | 0.39 | 0.94 |
| 459 | TMFHTSGY | 8 | 0     | 0.56 | 0.56 | -0.3  | 0.18 | -0.89 | 0.62 | 0.5   | 7.09  | 943.15  | 0.99 | 0.36 | 0.33 |
| 460 | MFHTSGYD | 8 | -0.06 | 0.58 | 0.58 | -0.65 | 0.18 | -0.46 | 0.62 | -0.5  | 5.09  | 957.13  | 0.99 | 0.32 | 0.08 |
| 461 | FHTSGYDT | 8 | -0.12 | 0.55 | 0.55 | -0.98 | 0.18 | -0.35 | 0.75 | -0.5  | 5.09  | 927.04  | 0.61 | 0.31 | 0.13 |
| 462 | HTSGYDTQ | 8 | -0.28 | 0.55 | 0.55 | -1.76 | 0.34 | -0.01 | 1    | -0.5  | 5.09  | 908     | 0.99 | 0.26 | 0.18 |
| 463 | TSGYDTQA | 8 | -0.2  | 0.62 | 0.62 | -1.14 | 0.16 | -0.01 | 0.88 | -1.14 | 3.8   | 841.93  | 0.99 | 0.23 | 0.16 |
| 464 | SGYDTQAI | 8 | -0.09 | 0.64 | 0.64 | -0.49 | 0.16 | -0.19 | 0.75 | -1    | 3.8   | 853.99  | 0.99 | 0.21 | 0.11 |
| 465 | GYDTQAIV | 8 | 0.01  | 0.66 | 0.66 | 0.14  | 0.16 | -0.41 | 0.62 | -1    | 3.8   | 866.05  | 0.98 | 0.41 | 0.12 |
| 466 | YDTQAIVE | 8 | -0.08 | 0.66 | 0.66 | -0.25 | 0.32 | -0.04 | 0.75 | -2    | 3.67  | 938.11  | 0.99 | 0.51 | 0.08 |
| 467 | DTQAIVEN | 8 | -0.17 | 0.67 | 0.67 | -0.53 | 0.32 | 0.28  | 0.88 | -2    | 3.67  | 889.04  | 0.61 | 0.53 | 0.30 |
| 468 | TQAIVENN | 8 | -0.16 | 0.67 | 0.67 | -0.53 | 0.32 | -0.08 | 1    | -1    | 4     | 888.06  | 0.99 | 0.54 | 0.36 |
| 469 | QAIVENNE | 8 | -0.21 | 0.68 | 0.68 | -0.88 | 0.47 | 0.35  | 1    | -2    | 3.8   | 916.07  | 0.99 | 0.41 | 0.16 |
| 470 | AIVENNES | 8 | -0.16 | 0.67 | 0.67 | -0.54 | 0.32 | 0.36  | 0.88 | -2    | 3.8   | 875.01  | 0.61 | 0.43 | 0.11 |
| 471 | IVENNEST | 8 | -0.21 | 0.67 | 0.67 | -0.85 | 0.32 | 0.38  | 1    | -2    | 3.8   | 905.04  | 0.94 | 0.48 | 0.09 |
| 472 | VENNESTE | 8 | -0.38 | 0.66 | 0.66 | -1.85 | 0.48 | 0.97  | 1.12 | -3    | 3.68  | 920.99  | 0.99 | 1.37 | 0.14 |
| 473 | ENNESTEY | 8 | -0.45 | 0.67 | 0.67 | -2.54 | 0.48 | 0.88  | 1.25 | -3    | 3.68  | 985.03  | 0.61 | 0.30 | 0.30 |
| 474 | NNESTEYG | 8 | -0.35 | 0.67 | 0.67 | -2.15 | 0.32 | 0.5   | 1.12 | -2    | 3.8   | 912.97  | 0.94 | 0.30 | 0.06 |
| 475 | NESTEYGL | 8 | -0.2  | 0.64 | 0.64 | -1.24 | 0.32 | 0.25  | 0.88 | -2    | 3.8   | 912.03  | 0.99 | 0.30 | 0.12 |
| 476 | ESTEYGLF | 8 | -0.05 | 0.63 | 0.63 | -0.45 | 0.32 | -0.09 | 0.62 | -2    | 3.8   | 945.1   | 0.61 | 0.54 | 0.18 |
| 477 | STEYGLFQ | 8 | -0.05 | 0.63 | 0.63 | -0.45 | 0.32 | -0.44 | 0.75 | -1    | 4     | 944.12  | 0.99 | 0.50 | 0.26 |
| 478 | TEYGLFQI | 8 | 0.07  | 0.65 | 0.65 | 0.21  | 0.32 | -0.7  | 0.62 | -1    | 4     | 970.21  | 0.99 | 0.58 | 0.23 |
| 479 | EYGLFQIS | 8 | 0.06  | 0.65 | 0.65 | 0.2   | 0.32 | -0.61 | 0.62 | -1    | 4     | 956.18  | 0.61 | 0.64 | 0.50 |
| 480 | YGLFQISN | 8 | 0.06  | 0.66 | 0.66 | 0.2   | 0.16 | -0.96 | 0.75 | 0     | 5.88  | 941.17  | 0.99 | 0.61 | 0.44 |
| 481 | GLFQISNK | 8 | -0.08 | 0.66 | 0.66 | -0.13 | 0.61 | -0.3  | 0.88 | 1     | 9.11  | 906.17  | 0.98 | 0.61 | 0.79 |
| 482 | LFQISNKL | 8 | -0.04 | 0.64 | 0.64 | 0.4   | 0.61 | -0.52 | 0.88 | 1     | 9.11  | 962.28  | 0.94 | 0.73 | 0.97 |
| 483 | FQISNKLW | 8 | -0.06 | 0.64 | 0.64 | -0.19 | 0.61 | -0.72 | 1    | 1     | 9.11  | 1035.33 | 0.61 | 0.65 | 0.97 |
| 484 | QISNKLWC | 8 | -0.13 | 0.62 | 0.62 | -0.22 | 0.61 | -0.54 | 1    | 1     | 8.57  | 991.29  | 0.99 | 0.72 | 0.93 |
| 485 | ISNKLWCK | 8 | -0.18 | 0.62 | 0.62 | -0.27 | 0.92 | -0.19 | 1    | 2     | 9.36  | 991.33  | 0.99 | 0.62 | 0.97 |
| 486 | SNKLWCKS | 8 | -0.3  | 0.6  | 0.6  | -0.94 | 0.92 | 0.07  | 1.12 | 2     | 9.36  | 965.24  | 0.99 | 0.59 | 0.86 |
| 487 | NKLWCKSS | 8 | -0.3  | 0.6  | 0.6  | -0.94 | 0.92 | 0.07  | 1.12 | 2     | 9.36  | 965.24  | 0.99 | 0.59 | 0.93 |
| 488 | KLWCKSSQ | 8 | -0.31 | 0.59 | 0.59 | -0.94 | 1.07 | 0.07  | 1.12 | 2     | 9.36  | 979.27  | 0.99 | 0.61 | 0.99 |
| 489 | LWCKSSQV | 8 | -0.1  | 0.6  | 0.6  | 0.08  | 0.61 | -0.49 | 0.88 | 1     | 8.57  | 950.23  | 0.99 | 0.52 | 0.86 |
| 490 | WCKSSQVP | 8 | -0.18 | 0.58 | 0.58 | -0.6  | 0.61 | -0.26 | 0.88 | 1     | 8.57  | 934.18  | 0.99 | 0.51 | 0.87 |
| 491 | CKSSQVPQ | 8 | -0.31 | 0.6  | 0.6  | -0.93 | 0.77 | 0.19  | 1    | 1     | 8.57  | 876.1   | 0.61 | 0.45 | 0.31 |
| 492 | KSSQVPQS | 8 | -0.35 | 0.59 | 0.59 | -1.34 | 0.77 | 0.35  | 1.12 | 1     | 9.11  | 860.04  | 0.99 | 0.57 | 0.07 |
| 493 | SSQVPQSR | 8 | -0.43 | 0.59 | 0.59 | -1.41 | 0.62 | 0.35  | 1.38 | 1     | 10.11 | 888.05  | 0.99 | 1.46 | 0.08 |
| 494 | SQVPQSRN | 8 | -0.48 | 0.61 | 0.61 | -1.75 | 0.62 | 0.34  | 1.5  | 1     | 10.11 | 915.08  | 0.99 | 0.44 | 0.14 |
| 495 | VQPQSRNI | 8 | -0.35 | 0.64 | 0.64 | -1.09 | 0.62 | 0.08  | 1.38 | 1     | 10.11 | 941.17  | 0.99 | 0.41 | 0.11 |
| 496 | VPQSRNIC | 8 | -0.26 | 0.63 | 0.63 | -0.34 | 0.46 | -0.07 | 1.12 | 1     | 8.6   | 916.17  | 0.99 | 0.40 | 0.79 |
| 497 | PQSRNICD | 8 | -0.42 | 0.64 | 0.64 | -1.3  | 0.46 | 0.49  | 1.25 | 0     | 6.16  | 932.12  | 0.94 | 0.38 | 0.25 |
| 498 | QSRNICDI | 8 | -0.32 | 0.68 | 0.68 | -0.54 | 0.46 | 0.26  | 1.25 | 0     | 6.16  | 948.17  | 0.99 | 0.47 | 0.27 |
| 499 | SRNICDIS | 8 | -0.27 | 0.66 | 0.66 | -0.2  | 0.31 | 0.28  | 1.12 | 0     | 6.16  | 907.11  | 0.99 | 0.53 | 0.68 |
| 500 | RNICDISC | 8 | -0.23 | 0.67 | 0.67 | 0.21  | 0.31 | 0.11  | 1    | 0     | 6.13  | 923.17  | 0.99 | 0.55 | 0.98 |
| 501 | NICDISCD | 8 | -0.1  | 0.68 | 0.68 | 0.34  | 0    | 0.11  | 0.62 | -2    | 3.57  | 882.07  | 0.99 | 0.54 | 0.86 |
| 502 | ICDISCDK | 8 | -0.16 | 0.67 | 0.67 | 0.29  | 0.46 | 0.46  | 0.62 | -1    | 4.21  | 896.14  | 0.99 | 0.46 | 0.87 |
| 503 | CDISCDKF | 8 | -0.17 | 0.67 | 0.67 | 0.08  | 0.46 | 0.38  | 0.62 | -1    | 4.21  | 930.15  | 0.61 | 0.49 | 0.59 |
| 504 | DISCDKFL | 8 | -0.11 | 0.66 | 0.66 | 0.24  | 0.46 | 0.28  | 0.62 | -1    | 4.21  | 940.18  | 0.61 | 0.66 | 0.52 |
| 505 | ISCDKFLD | 8 | -0.11 | 0.66 | 0.66 | 0.24  | 0.46 | 0.28  | 0.62 | -1    | 4.21  | 940.18  | 0.99 | 0.43 | 0.59 |
| 506 | SCDKFLDD | 8 | -0.29 | 0.67 | 0.67 | -0.76 | 0.46 | 0.88  | 0.75 | -2    | 3.94  | 942.1   | 0.99 | 0.42 | 0.66 |
| 507 | CDKFLDDD | 8 | -0.35 | 0.7  | 0.7  | -1.1  | 0.46 | 1.21  | 0.75 | -3    | 3.77  | 970.11  | 0.61 | 0.43 | 0.43 |
| 508 | DKFLDDDI | 8 | -0.26 | 0.71 | 0.71 | -0.85 | 0.46 | 1.11  | 0.75 | -3    | 3.77  | 980.14  | 0.61 | 0.43 | 0.40 |
| 509 | KFLDDDIT | 8 | -0.2  | 0.68 | 0.68 | -0.5  | 0.46 | 0.69  | 0.75 | -2    | 3.94  | 966.16  | 0.99 | 0.52 | 0.10 |
| 510 | FLDDDITD | 8 | -0.15 | 0.69 | 0.69 | -0.45 | 0    | 0.69  | 0.62 | -4    | 3.33  | 953.07  | 0.61 | 0.46 | 0.09 |

|     |            |   |       |      |      |       |      |       |      |      |       |         |        |      |      |
|-----|------------|---|-------|------|------|-------|------|-------|------|------|-------|---------|--------|------|------|
| 511 | LDDITDD    | 8 | -0.31 | 0.69 | 0.69 | -1.24 | 0    | 1.38  | 0.75 | -5   | 3.25  | 920.98  | 0.99   | 0.28 | 0.21 |
| 512 | DDITDDI    | 8 | -0.29 | 0.72 | 0.72 | -1.15 | 0    | 1.38  | 0.75 | -5   | 3.25  | 920.98  | 0.61   | 0.46 | 0.30 |
| 513 | DDITDDIM   | 8 | -0.17 | 0.72 | 0.72 | -0.47 | 0    | 0.84  | 0.62 | -4   | 3.33  | 937.09  | 0.61   | 0.42 | 0.14 |
| 514 | DITDDIMC   | 8 | -0.07 | 0.7  | 0.7  | 0.27  | 0    | 0.34  | 0.5  | -3   | 3.43  | 925.14  | 0.61   | 0.48 | 0.09 |
| 515 | ITDDIMCA   | 8 | 0.05  | 0.67 | 0.67 | 0.94  | 0    | -0.1  | 0.38 | -2   | 3.57  | 881.13  | 0.99   | 0.51 | 0.12 |
| 516 | TDDIMCAK   | 8 | -0.18 | 0.67 | 0.67 | -0.11 | 0.46 | 0.5   | 0.62 | -1   | 4.21  | 896.14  | 0.99   | 0.72 | 0.06 |
| 517 | DDIMCAKK   | 8 | -0.3  | 0.69 | 0.69 | -0.51 | 0.92 | 0.93  | 0.75 | 0    | 6.28  | 923.21  | 0.61   | 0.83 | 0.80 |
| 518 | DIMCAKKI   | 8 | -0.11 | 0.68 | 0.68 | 0.49  | 0.92 | 0.33  | 0.62 | 1    | 8.54  | 921.29  | 0.61   | 0.87 | 0.78 |
| 519 | IMCAKKIL   | 8 | 0.04  | 0.65 | 0.65 | 1.4   | 0.92 | -0.27 | 0.5  | 2    | 9.36  | 919.37  | 0.99   | 0.87 | 0.98 |
| 520 | MCAKKILD   | 8 | -0.14 | 0.66 | 0.66 | 0.4   | 0.92 | 0.33  | 0.62 | 1    | 8.54  | 921.29  | 0.99   | 0.77 | 0.93 |
| 521 | CAKKILDI   | 8 | -0.08 | 0.65 | 0.65 | 0.72  | 0.92 | 0.26  | 0.62 | 1    | 8.54  | 903.26  | 0.83   | 0.78 | 0.91 |
| 522 | AKKILDIK   | 8 | -0.22 | 0.66 | 0.66 | -0.08 | 1.38 | 0.76  | 0.88 | 2    | 9.72  | 928.3   | 0.61   | 0.76 | 0.88 |
| 523 | KKILDIKG   | 8 | -0.23 | 0.68 | 0.68 | -0.35 | 1.38 | 0.83  | 0.88 | 2    | 9.72  | 914.28  | 0.99   | 0.62 | 0.75 |
| 524 | KILDIKGI   | 8 | -0.01 | 0.68 | 0.68 | 0.7   | 0.92 | 0.22  | 0.62 | 1    | 8.94  | 899.27  | 0.99   | 0.46 | 0.66 |
| 525 | ILDIKID    | 8 | 0.04  | 0.69 | 0.69 | 0.75  | 0.46 | 0.22  | 0.5  | -1   | 4.21  | 886.18  | 0.99   | 0.30 | 0.60 |
| 526 | LDIKGIDY   | 8 | -0.05 | 0.69 | 0.69 | 0.02  | 0.46 | 0.16  | 0.62 | -1   | 4.21  | 936.19  | 0.99   | 0.30 | 0.26 |
| 527 | DIKGIDYW   | 8 | -0.07 | 0.69 | 0.69 | -0.56 | 0.46 | -0.04 | 0.75 | -1   | 4.21  | 1009.24 | 0.61   | 0.54 | 0.09 |
| 528 | IKGIDYWL   | 8 | 0.09  | 0.66 | 0.66 | 0.35  | 0.46 | -0.64 | 0.62 | 0    | 6.18  | 1007.32 | 0.99   | 0.48 | 0.49 |
| 529 | KGIDYWLA   | 8 | 0.03  | 0.63 | 0.63 | 0.01  | 0.46 | -0.47 | 0.62 | 0    | 6.18  | 965.23  | 0.99   | 0.56 | 0.74 |
| 530 | GIDYWLAH   | 8 | 0.12  | 0.55 | 0.55 | 0.1   | 0.18 | -0.91 | 0.5  | -0.5 | 5.09  | 974.2   | 0.98   | 0.74 | 0.76 |
| 531 | IDYWLAHK   | 8 | -0.04 | 0.55 | 0.55 | -0.34 | 0.64 | -0.54 | 0.75 | 0.5  | 7.09  | 1045.32 | 0.99   | 0.74 | 0.89 |
| 532 | DYWLAHKA   | 8 | -0.1  | 0.53 | 0.53 | -0.68 | 0.64 | -0.38 | 0.75 | 0.5  | 7.09  | 1003.23 | 0.86   | 0.81 | 0.98 |
| 533 | YWLAHKAL   | 8 | 0.06  | 0.5  | 0.5  | 0.24  | 0.64 | -0.97 | 0.62 | 1.5  | 8.94  | 1001.31 | 0.99   | 0.84 | 0.98 |
| 534 | WLAHKALC   | 8 | 0.06  | 0.49 | 0.49 | 0.71  | 0.64 | -0.81 | 0.5  | 1.5  | 8.57  | 941.27  | 0.99   | 0.73 | 0.98 |
| 535 | LAHKALCT   | 8 | -0.01 | 0.49 | 0.49 | 0.74  | 0.64 | -0.44 | 0.5  | 1.5  | 8.57  | 856.16  | 0.99   | 0.80 | 0.88 |
| 536 | AHKALCTE   | 8 | -0.15 | 0.51 | 0.51 | -0.18 | 0.8  | 0.16  | 0.62 | 0.5  | 7.06  | 872.11  | 0.61   | 0.64 | 0.95 |
| 537 | HKALCTEK   | 8 | -0.32 | 0.53 | 0.53 | -0.89 | 1.26 | 0.6   | 0.88 | 1.5  | 8.54  | 929.21  | 0.99   | 0.57 | 0.75 |
| 538 | KALCTEKL   | 8 | -0.21 | 0.6  | 0.6  | -0.01 | 1.08 | 0.44  | 0.75 | 1    | 8.54  | 905.23  | 0.99   | 0.61 | 0.84 |
| 539 | ALCTEKLE   | 8 | -0.15 | 0.6  | 0.6  | 0.04  | 0.78 | 0.44  | 0.62 | -1   | 4.54  | 906.17  | 0.61   | 0.41 | 0.54 |
| 540 | LCTEKLEQ   | 8 | -0.26 | 0.62 | 0.62 | -0.62 | 0.93 | 0.53  | 0.88 | -1   | 4.54  | 963.23  | 0.99   | 0.27 | 0.22 |
| 541 | CTEKLEQW   | 8 | -0.28 | 0.61 | 0.61 | -1.21 | 0.93 | 0.33  | 1    | -1   | 4.54  | 1036.28 | 0.61   | 0.31 | 0.21 |
| 542 | TEKLEQWL   | 8 | -0.22 | 0.6  | 0.6  | -1.05 | 0.93 | 0.23  | 1    | -1   | 4.54  | 1046.31 | 0.99   | 0.20 | 0.43 |
| 543 | EKLEQWLC   | 8 | -0.19 | 0.61 | 0.61 | -0.65 | 0.93 | 0.15  | 0.88 | -1   | 4.54  | 1048.34 | 0.61   | 0.16 | 0.36 |
| 544 | KLEQWLCE   | 8 | -0.19 | 0.61 | 0.61 | -0.65 | 0.93 | 0.15  | 0.88 | -1   | 4.54  | 1048.34 | 0.99   | 0.18 | 0.35 |
| 545 | LEQWLCEK   | 8 | -0.2  | 0.61 | 0.61 | -0.65 | 0.93 | 0.15  | 0.88 | -1   | 4.54  | 1048.34 | 0.99   | 0.10 | 0.30 |
| 546 | EQWLCEKL   | 8 | -0.19 | 0.61 | 0.61 | -0.65 | 0.93 | 0.15  | 0.88 | -1   | 4.54  | 1048.34 | 0.61   | 0.14 | 0.75 |
| 547 | MRFFVPLFL  | 9 | 0.21  | 0.63 | 0.63 | 1.78  | 0.27 | -1.21 | 0.44 | 1    | 10.11 | 1169.62 | 0.97   | 0.75 | 0.98 |
| 548 | RFVPLFLV   | 9 | 0.24  | 0.62 | 0.62 | 2.03  | 0.27 | -1.23 | 0.44 | 1    | 10.11 | 1137.56 | 0.99   | 0.75 | 0.93 |
| 549 | FFVPLFLVG  | 9 | 0.45  | 0.62 | 0.62 | 2.49  | 0    | -1.57 | 0    | 0    | 5.88  | 1038.43 | 0.86   | 0.73 | 0.98 |
| 550 | FVPLFLVGI  | 9 | 0.46  | 0.62 | 0.62 | 2.68  | 0    | -1.49 | 0    | 0    | 5.88  | 1004.42 | 0.86   | 0.70 | 0.97 |
| 551 | VPLFLVGIL  | 9 | 0.46  | 0.6  | 0.6  | 2.79  | 0    | -1.41 | 0    | 0    | 5.88  | 970.41  | 0.99   | 0.69 | 0.98 |
| 552 | PLFLVGILF  | 9 | 0.46  | 0.6  | 0.6  | 2.63  | 0    | -1.52 | 0    | 0    | 5.88  | 1018.45 | 0.99   | 0.71 | 0.96 |
| 553 | LFLVGILFPA | 9 | 0.46  | 0.6  | 0.6  | 2.63  | 0    | -1.52 | 0    | 0    | 5.88  | 1018.45 | 0.97   | 0.63 | 0.89 |
| 554 | FLVGILFPA  | 9 | 0.43  | 0.6  | 0.6  | 2.41  | 0    | -1.38 | 0    | 0    | 5.88  | 976.36  | 0.86   | 0.69 | 0.98 |
| 555 | LVGILFPAI  | 9 | 0.45  | 0.6  | 0.6  | 2.6   | 0    | -1.3  | 0    | 0    | 5.88  | 942.35  | 0.99   | 0.45 | 0.89 |
| 556 | VGILFPAIL  | 9 | 0.45  | 0.6  | 0.6  | 2.6   | 0    | -1.3  | 0    | 0    | 5.88  | 942.35  | 0.99   | 0.54 | 0.97 |
| 557 | GILFPAILA  | 9 | 0.41  | 0.58 | 0.58 | 2.33  | 0    | -1.19 | 0    | 0    | 5.88  | 914.29  | 0.98   | 0.67 | 0.98 |
| 558 | ILFPAILAK  | 9 | 0.27  | 0.58 | 0.58 | 1.94  | 0.41 | -0.86 | 0.22 | 1    | 9.11  | 985.41  | 0.99   | 0.80 | 0.98 |
| 559 | LFPAILAKQ  | 9 | 0.12  | 0.58 | 0.58 | 1.06  | 0.55 | -0.63 | 0.44 | 1    | 9.11  | 1000.38 | 0.99   | 0.72 | 0.97 |
| 560 | FPAILAKQF  | 9 | 0.12  | 0.6  | 0.6  | 0.94  | 0.55 | -0.71 | 0.44 | 1    | 9.11  | 1034.39 | 0.61   | 0.70 | 0.98 |
| 561 | PAILAKQFT  | 9 | 0.04  | 0.58 | 0.58 | 0.56  | 0.55 | -0.48 | 0.56 | 1    | 9.11  | 988.32  | 0.99   | 0.68 | 0.95 |
| 562 | AILAKQFTK  | 9 | -0.08 | 0.62 | 0.62 | 0.3   | 0.95 | -0.14 | 0.78 | 2    | 10.02 | 1019.38 | 0.61   | 0.68 | 0.97 |
| 563 | ILAKQFTKC  | 9 | -0.1  | 0.63 | 0.63 | 0.38  | 0.95 | -0.2  | 0.78 | 2    | 9.36  | 1051.44 | 0.99   | 0.79 | 0.97 |
| 564 | LAKQFTKCE  | 9 | -0.25 | 0.62 | 0.62 | -0.51 | 1.1  | 0.33  | 0.89 | 1    | 8.54  | 1067.39 | 0.99   | 0.75 | 0.82 |
| 565 | AKQFTKCEL  | 9 | -0.25 | 0.62 | 0.62 | -0.51 | 1.1  | 0.33  | 0.89 | 1    | 8.54  | 1067.39 | 0.61   | 0.61 | 0.56 |
| 566 | KQFTKCELS  | 9 | -0.31 | 0.63 | 0.63 | -0.8  | 1.1  | 0.42  | 1    | 1    | 8.54  | 1083.39 | 99.22% | 0.39 | 0.39 |
| 567 | QFTKCELSQ  | 9 | -0.26 | 0.63 | 0.63 | -0.76 | 0.83 | 0.11  | 1    | 0    | 6.32  | 1083.35 | 0.94   | 0.40 | 0.16 |
| 568 | FTKCELSQL  | 9 | -0.13 | 0.61 | 0.61 | 0.06  | 0.69 | -0.11 | 0.78 | 0    | 6.32  | 1068.38 | 0.61   | 0.29 | 0.50 |
| 569 | TKCELSQLL  | 9 | -0.14 | 0.59 | 0.59 | 0.17  | 0.69 | -0.03 | 0.78 | 0    | 6.32  | 1034.37 | 0.99   | 0.36 | 0.74 |
| 570 | KCELSQLLK  | 9 | -0.24 | 0.61 | 0.61 | -0.19 | 1.1  | 0.34  | 0.89 | 1    | 8.54  | 1061.44 | 0.99   | 0.28 | 0.82 |
| 571 | CELSQLLKD  | 9 | -0.2  | 0.62 | 0.62 | -0.14 | 0.69 | 0.34  | 0.78 | -1   | 4.38  | 1048.35 | 0.61   | 0.25 | 0.39 |
| 572 | ELSQLLKDI  | 9 | -0.12 | 0.62 | 0.62 | 0.08  | 0.69 | 0.26  | 0.78 | -1   | 4.38  | 1058.38 | 0.61   | 0.28 | 0.29 |
| 573 | LSQLLKDID  | 9 | -0.13 | 0.63 | 0.63 | 0.08  | 0.55 | 0.26  | 0.78 | -1   | 4.21  | 1044.35 | 0.99   | 0.32 | 0.62 |
| 574 | SQLLKDIDG  | 9 | -0.17 | 0.65 | 0.65 | -0.39 | 0.55 | 0.46  | 0.78 | -1   | 4.21  | 988.24  | 0.99   | 0.31 | 0.11 |

|     |           |   |       |      |      |       |      |       |      |      |       |         |      |      |      |
|-----|-----------|---|-------|------|------|-------|------|-------|------|------|-------|---------|------|------|------|
| 575 | QLLKIDIDY | 9 | -0.14 | 0.67 | 0.67 | -0.44 | 0.55 | 0.17  | 0.78 | -1   | 4.21  | 1064.34 | 0.94 | 0.29 | 0.06 |
| 576 | LLKIDIDYG | 9 | -0.05 | 0.67 | 0.67 | -0.1  | 0.41 | 0.14  | 0.56 | -1   | 4.21  | 993.26  | 0.99 | 0.44 | 0.13 |
| 577 | LKDIDGYGG | 9 | -0.09 | 0.69 | 0.69 | -0.57 | 0.41 | 0.34  | 0.56 | -1   | 4.21  | 937.15  | 0.99 | 0.41 | 0.04 |
| 578 | KDIDGYGGI | 9 | -0.06 | 0.7  | 0.7  | -0.49 | 0.41 | 0.34  | 0.56 | -1   | 4.21  | 937.15  | 0.99 | 0.39 | 0.06 |
| 579 | DIDGYGGIA | 9 | 0.09  | 0.69 | 0.69 | 0.14  | 0    | -0.04 | 0.33 | -2   | 3.57  | 880.05  | 0.61 | 0.55 | 0.15 |
| 580 | IDGYGGIAL | 9 | 0.22  | 0.66 | 0.66 | 0.96  | 0    | -0.58 | 0.22 | -1   | 3.8   | 878.13  | 0.99 | 0.67 | 0.63 |
| 581 | DGYGGIALP | 9 | 0.14  | 0.62 | 0.62 | 0.28  | 0    | -0.38 | 0.22 | -1   | 3.8   | 862.08  | 0.86 | 0.70 | 0.58 |
| 582 | YGGGIALPE | 9 | 0.15  | 0.61 | 0.61 | 0.28  | 0.14 | -0.38 | 0.22 | -1   | 4     | 876.11  | 0.98 | 0.71 | 0.83 |
| 583 | YGGIALPEL | 9 | 0.19  | 0.6  | 0.6  | 0.74  | 0.14 | -0.58 | 0.22 | -1   | 4     | 932.22  | 0.99 | 0.68 | 0.59 |
| 584 | GGIALPELI | 9 | 0.27  | 0.6  | 0.6  | 1.39  | 0.14 | -0.52 | 0.11 | -1   | 4     | 882.21  | 0.98 | 0.68 | 0.94 |
| 585 | GIALPELIC | 9 | 0.25  | 0.59 | 0.59 | 1.71  | 0.14 | -0.63 | 0.11 | -1   | 4     | 928.29  | 0.98 | 0.70 | 0.85 |
| 586 | IALPELICT | 9 | 0.22  | 0.57 | 0.57 | 1.68  | 0.14 | -0.68 | 0.22 | -1   | 4     | 972.34  | 0.99 | 0.66 | 0.54 |
| 587 | ALPELICTM | 9 | 0.16  | 0.58 | 0.58 | 1.39  | 0.14 | -0.62 | 0.22 | -1   | 4     | 990.37  | 0.61 | 0.68 | 0.55 |
| 588 | LPELICTMF | 9 | 0.2   | 0.6  | 0.6  | 1.5   | 0.14 | -0.84 | 0.22 | -1   | 4     | 1066.47 | 0.99 | 0.61 | 0.16 |
| 589 | PELICTMFH | 9 | 0.1   | 0.54 | 0.54 | 0.72  | 0.3  | -0.7  | 0.33 | -0.5 | 5.25  | 1090.45 | 0.94 | 0.56 | 0.11 |
| 590 | ELICTMFHT | 9 | 0.09  | 0.56 | 0.56 | 0.82  | 0.3  | -0.74 | 0.44 | -0.5 | 5.25  | 1094.44 | 0.61 | 0.57 | 0.19 |
| 591 | LICTMFHTS | 9 | 0.13  | 0.55 | 0.55 | 1.12  | 0.16 | -1.04 | 0.44 | 0.5  | 7.06  | 1052.4  | 0.99 | 0.57 | 0.94 |
| 592 | ICTMFHTSG | 9 | 0.09  | 0.56 | 0.56 | 0.66  | 0.16 | -0.84 | 0.44 | 0.5  | 7.06  | 996.29  | 0.99 | 0.41 | 0.98 |
| 593 | CTMFHTSGY | 9 | 0.01  | 0.56 | 0.56 | 0.01  | 0.16 | -0.9  | 0.56 | 0.5  | 7.06  | 1046.3  | 0.86 | 0.37 | 0.85 |
| 594 | TMFHTSGYD | 9 | -0.08 | 0.58 | 0.58 | -0.66 | 0.16 | -0.46 | 0.67 | -0.5 | 5.09  | 1058.25 | 0.99 | 0.35 | 0.11 |
| 595 | MFHTSGYDT | 9 | -0.08 | 0.58 | 0.58 | -0.66 | 0.16 | -0.46 | 0.67 | -0.5 | 5.09  | 1058.25 | 0.99 | 0.31 | 0.07 |
| 596 | FHTSGYDTQ | 9 | -0.18 | 0.57 | 0.57 | -1.26 | 0.3  | -0.29 | 0.89 | -0.5 | 5.09  | 1055.19 | 0.61 | 0.31 | 0.12 |
| 597 | HTSGYDTQA | 9 | -0.22 | 0.55 | 0.55 | -1.37 | 0.3  | -0.07 | 0.89 | -0.5 | 5.09  | 979.09  | 0.99 | 0.26 | 0.17 |
| 598 | TSGYDTQAI | 9 | -0.1  | 0.63 | 0.63 | -0.51 | 0.14 | -0.21 | 0.78 | -1   | 3.8   | 955.11  | 0.99 | 0.19 | 0.12 |
| 599 | SGYDTQAIV | 9 | -0.02 | 0.64 | 0.64 | 0.03  | 0.14 | -0.33 | 0.67 | -1   | 3.8   | 953.14  | 0.99 | 0.28 | 0.13 |
| 600 | GYDTQAIVE | 9 | -0.06 | 0.66 | 0.66 | -0.27 | 0.28 | -0.03 | 0.67 | -2   | 3.67  | 995.18  | 0.98 | 0.46 | 0.14 |
| 601 | YDTQAIVEN | 9 | -0.15 | 0.67 | 0.67 | -0.61 | 0.28 | -0.01 | 0.89 | -2   | 3.67  | 1052.23 | 0.99 | 0.53 | 0.14 |
| 602 | DTQAIVENN | 9 | -0.22 | 0.68 | 0.68 | -0.86 | 0.28 | 0.27  | 1    | -2   | 3.67  | 1003.16 | 0.86 | 0.51 | 0.29 |
| 603 | TQAIVENNE | 9 | -0.21 | 0.67 | 0.67 | -0.86 | 0.42 | 0.27  | 1    | -2   | 3.8   | 1017.19 | 0.99 | 0.42 | 0.21 |
| 604 | QAIVENNES | 9 | -0.22 | 0.67 | 0.67 | -0.87 | 0.42 | 0.34  | 1    | -2   | 3.8   | 1003.16 | 0.99 | 0.40 | 0.11 |
| 605 | AIVENNEST | 9 | -0.16 | 0.65 | 0.65 | -0.56 | 0.28 | 0.28  | 0.89 | -2   | 3.8   | 976.13  | 0.61 | 0.42 | 0.11 |
| 606 | IVENNESTE | 9 | -0.26 | 0.67 | 0.67 | -1.14 | 0.42 | 0.67  | 1    | -3   | 3.68  | 1034.17 | 0.94 | 0.44 | 0.06 |
| 607 | VENNESTEY | 9 | -0.34 | 0.67 | 0.67 | -1.79 | 0.42 | 0.61  | 1.11 | -3   | 3.68  | 1084.18 | 0.99 | 0.38 | 0.09 |
| 608 | ENNESTEYG | 9 | -0.38 | 0.67 | 0.67 | -2.3  | 0.42 | 0.78  | 1.11 | -3   | 3.68  | 1042.1  | 0.61 | 0.33 | 0.09 |
| 609 | NNESTEYGL | 9 | -0.25 | 0.65 | 0.65 | -1.49 | 0.28 | 0.24  | 1    | -2   | 3.8   | 1026.15 | 0.94 | 0.28 | 0.09 |
| 610 | NESTEYGLF | 9 | -0.11 | 0.64 | 0.64 | -0.79 | 0.28 | -0.06 | 0.78 | -2   | 3.8   | 1059.22 | 0.99 | 0.47 | 0.14 |
| 611 | ESTEYGLFQ | 9 | -0.12 | 0.63 | 0.63 | -0.79 | 0.42 | -0.06 | 0.78 | -2   | 3.8   | 1073.25 | 0.61 | 0.49 | 0.18 |
| 612 | STEYGLFQI | 9 | 0.03  | 0.64 | 0.64 | 0.1   | 0.28 | -0.59 | 0.67 | -1   | 4     | 1057.3  | 0.99 | 0.53 | 0.23 |
| 613 | TEYGLFQIS | 9 | 0.03  | 0.64 | 0.64 | 0.1   | 0.28 | -0.59 | 0.67 | -1   | 4     | 1057.3  | 0.99 | 0.58 | 0.23 |
| 614 | EYGLFQISN | 9 | -0.02 | 0.66 | 0.66 | -0.21 | 0.28 | -0.52 | 0.78 | -1   | 4     | 1070.3  | 0.61 | 0.58 | 0.30 |
| 615 | YGLFQISNK | 9 | -0.07 | 0.66 | 0.66 | -0.26 | 0.55 | -0.52 | 0.89 | 1    | 8.94  | 1069.36 | 0.99 | 0.59 | 0.49 |
| 616 | GLFQISNKL | 9 | -0.01 | 0.64 | 0.64 | 0.31  | 0.55 | -0.47 | 0.78 | 1    | 9.11  | 1019.35 | 0.98 | 0.70 | 0.94 |
| 617 | LFQISNKLW | 9 | 0.01  | 0.62 | 0.62 | 0.26  | 0.55 | -0.84 | 0.89 | 1    | 9.11  | 1148.51 | 0.94 | 0.70 | 0.95 |
| 618 | FQISNKLWC | 9 | -0.05 | 0.63 | 0.63 | 0.11  | 0.55 | -0.76 | 0.89 | 1    | 8.57  | 1138.48 | 0.61 | 0.64 | 0.98 |
| 619 | QISNKLWCK | 9 | -0.24 | 0.63 | 0.63 | -0.63 | 0.95 | -0.14 | 1.11 | 2    | 9.36  | 1119.48 | 0.99 | 0.60 | 0.91 |
| 620 | ISNKLWCKS | 9 | -0.19 | 0.61 | 0.61 | -0.33 | 0.82 | -0.13 | 1    | 2    | 9.36  | 1078.42 | 0.99 | 0.63 | 0.85 |
| 621 | SNKLWCKSS | 9 | -0.3  | 0.6  | 0.6  | -0.92 | 0.82 | 0.1   | 1.11 | 2    | 9.36  | 1052.33 | 0.99 | 0.58 | 0.82 |
| 622 | NKLWCKSSQ | 9 | -0.35 | 0.61 | 0.61 | -1.22 | 0.95 | 0.09  | 1.22 | 2    | 9.36  | 1093.39 | 0.99 | 0.58 | 0.88 |
| 623 | KLWCKSSQV | 9 | -0.21 | 0.61 | 0.61 | -0.37 | 0.95 | -0.1  | 1    | 2    | 9.36  | 1078.42 | 0.99 | 0.61 | 0.97 |
| 624 | LWCKSSQVP | 9 | -0.1  | 0.57 | 0.57 | -0.11 | 0.55 | -0.43 | 0.78 | 1    | 8.57  | 1047.36 | 0.99 | 0.53 | 0.88 |
| 625 | WCKSSQVPQ | 9 | -0.24 | 0.59 | 0.59 | -0.92 | 0.69 | -0.21 | 1    | 1    | 8.57  | 1062.33 | 0.99 | 0.48 | 0.77 |
| 626 | CKSSQVPQS | 9 | -0.31 | 0.59 | 0.59 | -0.91 | 0.69 | 0.2   | 1    | 1    | 8.57  | 963.19  | 0.86 | 0.45 | 0.06 |
| 627 | KSSQVPQSR | 9 | -0.51 | 0.6  | 0.6  | -1.69 | 0.96 | 0.64  | 1.44 | 2    | 11.01 | 1016.24 | 0.99 | 0.50 | 0.06 |
| 628 | SSQVPQSRN | 9 | -0.45 | 0.61 | 0.61 | -1.64 | 0.55 | 0.33  | 1.44 | 1    | 10.11 | 1002.17 | 0.99 | 0.45 | 0.12 |
| 629 | SQVPQSRNI | 9 | -0.34 | 0.62 | 0.62 | -1.06 | 0.55 | 0.1   | 1.33 | 1    | 10.11 | 1028.26 | 0.99 | 0.41 | 0.13 |
| 630 | QVPQSRNIC | 9 | -0.31 | 0.63 | 0.63 | -0.69 | 0.55 | -0.04 | 1.22 | 1    | 8.6   | 1044.32 | 0.99 | 0.43 | 0.57 |
| 631 | VPQSRNICD | 9 | -0.31 | 0.64 | 0.64 | -0.69 | 0.41 | 0.27  | 1.11 | 0    | 6.16  | 1031.27 | 0.99 | 0.44 | 0.15 |
| 632 | PQSRNICDI | 9 | -0.29 | 0.64 | 0.64 | -0.66 | 0.41 | 0.23  | 1.11 | 0    | 6.16  | 1045.3  | 0.94 | 0.39 | 0.20 |
| 633 | QSRNICDIS | 9 | -0.31 | 0.66 | 0.66 | -0.57 | 0.41 | 0.27  | 1.22 | 0    | 6.16  | 1035.26 | 0.99 | 0.49 | 0.15 |
| 634 | SRNICDISC | 9 | -0.23 | 0.66 | 0.66 | 0.1   | 0.27 | 0.13  | 1    | 0    | 6.13  | 1010.26 | 0.99 | 0.52 | 0.97 |
| 635 | RNICDISCD | 9 | -0.28 | 0.68 | 0.68 | -0.2  | 0.27 | 0.43  | 1    | -1   | 4.21  | 1038.27 | 0.99 | 0.55 | 0.80 |
| 636 | NICDISCDK | 9 | -0.21 | 0.68 | 0.68 | -0.13 | 0.41 | 0.43  | 0.78 | -1   | 4.21  | 1010.26 | 0.99 | 0.47 | 0.76 |
| 637 | ICDISCDKF | 9 | -0.07 | 0.67 | 0.67 | 0.57  | 0.41 | 0.13  | 0.56 | -1   | 4.21  | 1043.33 | 0.99 | 0.50 | 0.77 |
| 638 | CDISCDKFL | 9 | -0.09 | 0.66 | 0.66 | 0.49  | 0.41 | 0.13  | 0.56 | -1   | 4.21  | 1043.33 | 0.61 | 0.66 | 0.70 |

|     |            |    |       |      |      |       |      |       |      |     |       |         |      |      |      |
|-----|------------|----|-------|------|------|-------|------|-------|------|-----|-------|---------|------|------|------|
| 639 | DISCDKFLD  | 9  | -0.18 | 0.67 | 0.67 | -0.18 | 0.41 | 0.58  | 0.67 | -2  | 3.94  | 1055.28 | 0.61 | 0.45 | 0.36 |
| 640 | ISCDKFLDD  | 9  | -0.18 | 0.67 | 0.67 | -0.18 | 0.41 | 0.58  | 0.67 | -2  | 3.94  | 1055.28 | 0.99 | 0.39 | 0.32 |
| 641 | SCDKFLDDD  | 9  | -0.34 | 0.68 | 0.68 | -1.07 | 0.41 | 1.11  | 0.78 | -3  | 3.77  | 1057.2  | 0.99 | 0.42 | 0.59 |
| 642 | CDKFLDDDI  | 9  | -0.23 | 0.7  | 0.7  | -0.48 | 0.41 | 0.88  | 0.67 | -3  | 3.77  | 1083.29 | 0.61 | 0.45 | 0.25 |
| 643 | DKFLDDDIT  | 9  | -0.25 | 0.69 | 0.69 | -0.83 | 0.41 | 0.94  | 0.78 | -3  | 3.77  | 1081.26 | 0.61 | 0.44 | 0.09 |
| 644 | KFLDDDITD  | 9  | -0.25 | 0.69 | 0.69 | -0.83 | 0.41 | 0.94  | 0.78 | -3  | 3.77  | 1081.26 | 0.99 | 0.50 | 0.08 |
| 645 | FLDDDITDD  | 9  | -0.21 | 0.7  | 0.7  | -0.79 | 0    | 0.94  | 0.67 | -5  | 3.25  | 1068.17 | 0.61 | 0.46 | 0.14 |
| 646 | LDDDITDDI  | 9  | -0.2  | 0.7  | 0.7  | -0.6  | 0    | 1.02  | 0.67 | -5  | 3.25  | 1034.16 | 0.99 | 0.29 | 0.17 |
| 647 | DDDITDDIM  | 9  | -0.23 | 0.72 | 0.72 | -0.81 | 0    | 1.08  | 0.67 | -5  | 3.25  | 1052.19 | 0.61 | 0.42 | 0.16 |
| 648 | DDITDDIMC  | 9  | -0.14 | 0.71 | 0.71 | -0.14 | 0    | 0.63  | 0.56 | -4  | 3.33  | 1040.24 | 0.61 | 0.48 | 0.08 |
| 649 | DITDDIMCA  | 9  | -0.04 | 0.68 | 0.68 | 0.44  | 0    | 0.24  | 0.44 | -3  | 3.43  | 996.23  | 0.61 | 0.51 | 0.05 |
| 650 | ITDDIMCAK  | 9  | -0.08 | 0.67 | 0.67 | 0.4   | 0.41 | 0.24  | 0.56 | -1  | 4.21  | 1009.32 | 0.99 | 0.68 | 0.08 |
| 651 | TDDIMCAKK  | 9  | -0.28 | 0.67 | 0.67 | -0.53 | 0.82 | 0.78  | 0.78 | 0   | 6.28  | 1024.33 | 0.99 | 0.77 | 0.63 |
| 652 | DDIMCAKKI  | 9  | -0.18 | 0.69 | 0.69 | 0.04  | 0.82 | 0.62  | 0.67 | 0   | 6.28  | 1036.39 | 0.61 | 0.80 | 0.57 |
| 653 | DIMCAKKIL  | 9  | -0.04 | 0.66 | 0.66 | 0.86  | 0.82 | 0.09  | 0.56 | 1   | 8.54  | 1034.47 | 0.61 | 0.88 | 0.96 |
| 654 | IMCAKKILD  | 9  | -0.04 | 0.66 | 0.66 | 0.86  | 0.82 | 0.09  | 0.56 | 1   | 8.54  | 1034.47 | 0.99 | 0.75 | 0.98 |
| 655 | MCAKKILDI  | 9  | -0.04 | 0.66 | 0.66 | 0.86  | 0.82 | 0.09  | 0.56 | 1   | 8.54  | 1034.47 | 0.99 | 0.79 | 0.92 |
| 656 | CAKKILDIK  | 9  | -0.19 | 0.65 | 0.65 | 0.21  | 1.22 | 0.57  | 0.78 | 2   | 9.25  | 1031.45 | 0.83 | 0.79 | 0.97 |
| 657 | AKKILDIKG  | 9  | -0.18 | 0.66 | 0.66 | -0.11 | 1.22 | 0.68  | 0.78 | 2   | 9.72  | 985.37  | 0.61 | 0.65 | 0.82 |
| 658 | KKILDIKGI  | 9  | -0.13 | 0.68 | 0.68 | -0.13 | 1.22 | 0.53  | 0.78 | 2   | 9.72  | 1027.46 | 0.99 | 0.58 | 0.62 |
| 659 | KILDIKID   | 9  | -0.08 | 0.69 | 0.69 | 0.23  | 0.82 | 0.53  | 0.67 | 0   | 6.31  | 1014.37 | 0.99 | 0.44 | 0.45 |
| 660 | ILDIKIDY   | 9  | 0.04  | 0.69 | 0.69 | 0.52  | 0.41 | -0.06 | 0.56 | -1  | 4.21  | 1049.37 | 0.99 | 0.31 | 0.35 |
| 661 | LDIKIDYW   | 9  | 0     | 0.67 | 0.67 | -0.08 | 0.41 | -0.23 | 0.67 | -1  | 4.21  | 1122.42 | 0.99 | 0.46 | 0.15 |
| 662 | DIKIDYWL   | 9  | 0     | 0.67 | 0.67 | -0.08 | 0.41 | -0.23 | 0.67 | -1  | 4.21  | 1122.42 | 0.86 | 0.51 | 0.13 |
| 663 | IKGIDYWLA  | 9  | 0.11  | 0.64 | 0.64 | 0.51  | 0.41 | -0.62 | 0.56 | 0   | 6.18  | 1078.41 | 0.99 | 0.54 | 0.74 |
| 664 | KGIDYWLAH  | 9  | -0.02 | 0.56 | 0.56 | -0.34 | 0.57 | -0.48 | 0.67 | 0.5 | 7.09  | 1102.39 | 0.99 | 0.54 | 0.67 |
| 665 | GIDYWLAHK  | 9  | -0.02 | 0.56 | 0.56 | -0.34 | 0.57 | -0.48 | 0.67 | 0.5 | 7.09  | 1102.39 | 0.98 | 0.74 | 0.86 |
| 666 | IDYWLAHKA  | 9  | -0.01 | 0.55 | 0.55 | -0.1  | 0.57 | -0.53 | 0.67 | 0.5 | 7.09  | 1116.41 | 0.99 | 0.77 | 0.90 |
| 667 | DYWLAHKAL  | 9  | -0.03 | 0.53 | 0.53 | -0.18 | 0.57 | -0.53 | 0.67 | 0.5 | 7.09  | 1116.41 | 0.86 | 0.82 | 0.97 |
| 668 | YWLAHKALC  | 9  | 0.05  | 0.51 | 0.51 | 0.49  | 0.57 | -0.98 | 0.56 | 1.5 | 8.54  | 1104.46 | 0.99 | 0.78 | 0.98 |
| 669 | WLAHKALCT  | 9  | 0.03  | 0.49 | 0.49 | 0.56  | 0.57 | -0.77 | 0.56 | 1.5 | 8.57  | 1042.39 | 0.99 | 0.74 | 0.96 |
| 670 | LAHKALCTE  | 9  | -0.08 | 0.51 | 0.51 | 0.27  | 0.71 | -0.06 | 0.56 | 0.5 | 7.06  | 985.29  | 0.99 | 0.77 | 0.98 |
| 671 | AHKALCTEK  | 9  | -0.26 | 0.53 | 0.53 | -0.59 | 1.12 | 0.48  | 0.78 | 1.5 | 8.54  | 1000.3  | 0.61 | 0.58 | 0.81 |
| 672 | HKALCTEKL  | 9  | -0.23 | 0.53 | 0.53 | -0.37 | 1.12 | 0.33  | 0.78 | 1.5 | 8.54  | 1042.39 | 0.99 | 0.58 | 0.84 |
| 673 | KALCTEKLE  | 9  | -0.25 | 0.61 | 0.61 | -0.4  | 1.1  | 0.72  | 0.78 | 0   | 6.46  | 1034.36 | 0.99 | 0.58 | 0.41 |
| 674 | ALCTEKLEQ  | 9  | -0.21 | 0.61 | 0.61 | -0.36 | 0.83 | 0.41  | 0.78 | -1  | 4.54  | 1034.32 | 0.61 | 0.37 | 0.25 |
| 675 | LCTEKLEQW  | 9  | -0.19 | 0.6  | 0.6  | -0.66 | 0.83 | 0.09  | 0.89 | -1  | 4.54  | 1149.46 | 0.99 | 0.25 | 0.46 |
| 676 | CTEKLEQWL  | 9  | -0.19 | 0.6  | 0.6  | -0.66 | 0.83 | 0.09  | 0.89 | -1  | 4.54  | 1149.46 | 0.61 | 0.22 | 0.63 |
| 677 | TEKLEQWLC  | 9  | -0.19 | 0.6  | 0.6  | -0.66 | 0.83 | 0.09  | 0.89 | -1  | 4.54  | 1149.46 | 0.99 | 0.14 | 0.45 |
| 678 | EKLEQWLCE  | 9  | -0.24 | 0.62 | 0.62 | -0.97 | 0.97 | 0.47  | 0.89 | -2  | 4.26  | 1177.47 | 0.61 | 0.15 | 0.13 |
| 679 | KLEQWLCEK  | 9  | -0.3  | 0.62 | 0.62 | -1.01 | 1.24 | 0.47  | 1    | 0   | 6.46  | 1176.53 | 0.99 | 0.15 | 0.19 |
| 680 | LEQWLCEKL  | 9  | -0.11 | 0.6  | 0.6  | -0.16 | 0.83 | -0.07 | 0.78 | -1  | 4.54  | 1161.52 | 0.99 | 0.15 | 0.67 |
| 681 | MRFFVPLFLV | 10 | 0.24  | 0.64 | 0.64 | 2.02  | 0.25 | -1.24 | 0.4  | 1   | 10.11 | 1268.77 | 0.97 | 0.73 | 0.95 |
| 682 | FFVPLFLVGI | 10 | 0.23  | 0.63 | 0.63 | 1.79  | 0.25 | -1.11 | 0.4  | 1   | 10.11 | 1194.63 | 0.99 | 0.73 | 0.99 |
| 683 | FFVPLFLVGI | 10 | 0.48  | 0.63 | 0.63 | 2.69  | 0    | -1.59 | 0    | 0   | 5.88  | 1151.61 | 0.86 | 0.74 | 0.92 |
| 684 | FVPLFLVGIL | 10 | 0.47  | 0.61 | 0.61 | 2.79  | 0    | -1.52 | 0    | 0   | 5.88  | 1117.6  | 0.86 | 0.74 | 0.98 |
| 685 | VPLFLVGILF | 10 | 0.47  | 0.61 | 0.61 | 2.79  | 0    | -1.52 | 0    | 0   | 5.88  | 1117.6  | 0.97 | 0.69 | 0.87 |
| 686 | PLFLVGILFP | 10 | 0.41  | 0.58 | 0.58 | 2.21  | 0    | -1.37 | 0    | 0   | 5.88  | 1115.58 | 0.99 | 0.71 | 0.98 |
| 687 | LFLVGILFPA | 10 | 0.44  | 0.6  | 0.6  | 2.55  | 0    | -1.42 | 0    | 0   | 5.88  | 1089.54 | 0.99 | 0.71 | 0.83 |
| 688 | FLVGILFPAI | 10 | 0.46  | 0.61 | 0.61 | 2.62  | 0    | -1.42 | 0    | 0   | 5.88  | 1089.54 | 0.86 | 0.66 | 0.98 |
| 689 | LVGILFPAIL | 10 | 0.45  | 0.6  | 0.6  | 2.72  | 0    | -1.35 | 0    | 0   | 5.88  | 1055.53 | 0.99 | 0.47 | 0.76 |
| 690 | VGILFPAILA | 10 | 0.43  | 0.59 | 0.59 | 2.52  | 0    | -1.22 | 0    | 0   | 5.88  | 1013.44 | 0.99 | 0.65 | 0.95 |
| 691 | GILFPAILAK | 10 | 0.26  | 0.59 | 0.59 | 1.71  | 0.37 | -0.77 | 0.2  | 1   | 9.11  | 1042.48 | 0.95 | 0.80 | 0.98 |
| 692 | ILFPAILAKQ | 10 | 0.18  | 0.59 | 0.59 | 1.4   | 0.49 | -0.75 | 0.4  | 1   | 9.11  | 1113.56 | 0.99 | 0.75 | 0.98 |
| 693 | LFPAILAKQF | 10 | 0.16  | 0.59 | 0.59 | 1.23  | 0.49 | -0.82 | 0.4  | 1   | 9.11  | 1147.57 | 0.98 | 0.74 | 0.98 |
| 694 | FPAILAKQFT | 10 | 0.09  | 0.59 | 0.59 | 0.78  | 0.49 | -0.68 | 0.5  | 1   | 9.11  | 1135.51 | 0.80 | 0.73 | 0.97 |
| 695 | PAILAKQFTK | 10 | -0.08 | 0.59 | 0.59 | 0.11  | 0.86 | -0.13 | 0.7  | 2   | 10.02 | 1116.51 | 0.98 | 0.73 | 0.98 |
| 696 | AILAKQFTKC | 10 | -0.07 | 0.62 | 0.62 | 0.52  | 0.86 | -0.23 | 0.7  | 2   | 9.36  | 1122.53 | 0.61 | 0.71 | 0.97 |
| 697 | ILAKQFTKCE | 10 | -0.15 | 0.63 | 0.63 | -0.01 | 0.99 | 0.12  | 0.8  | 1   | 8.54  | 1180.57 | 0.99 | 0.76 | 0.68 |
| 698 | LAKQFTKCEL | 10 | -0.17 | 0.61 | 0.61 | -0.08 | 0.99 | 0.12  | 0.8  | 1   | 8.54  | 1180.57 | 0.99 | 0.67 | 0.88 |
| 699 | AKQFTKCELS | 10 | -0.25 | 0.61 | 0.61 | -0.54 | 0.99 | 0.33  | 0.9  | 1   | 8.54  | 1154.48 | 0.61 | 0.56 | 0.42 |
| 700 | KQFTKCELSQ | 10 | -0.35 | 0.63 | 0.63 | -1.07 | 1.11 | 0.4   | 1.1  | 1   | 8.54  | 1211.54 | 0.99 | 0.42 | 0.29 |
| 701 | QFTKCELSQL | 10 | -0.18 | 0.62 | 0.62 | -0.3  | 0.74 | -0.08 | 0.9  | 0   | 6.32  | 1196.53 | 0.94 | 0.30 | 0.16 |
| 702 | FTKCELSQLL | 10 | -0.06 | 0.6  | 0.6  | 0.43  | 0.62 | -0.28 | 0.7  | 0   | 6.32  | 1181.56 | 0.61 | 0.32 | 0.69 |

|     |             |    |       |      |      |       |      |       |     |      |       |         |      |      |      |
|-----|-------------|----|-------|------|------|-------|------|-------|-----|------|-------|---------|------|------|------|
| 703 | TKCELSQLLK  | 10 | -0.23 | 0.6  | 0.6  | -0.24 | 0.99 | 0.27  | 0.9 | 1    | 8.54  | 1162.56 | 0.99 | 0.34 | 0.82 |
| 704 | KCELSQLLKD  | 10 | -0.29 | 0.62 | 0.62 | -0.52 | 0.99 | 0.61  | 0.9 | 0    | 6.38  | 1176.54 | 0.99 | 0.27 | 0.65 |
| 705 | CELSQLLKDI  | 10 | -0.1  | 0.62 | 0.62 | 0.32  | 0.62 | 0.13  | 0.7 | -1   | 4.38  | 1161.53 | 0.61 | 0.27 | 0.17 |
| 706 | ELSQLLKID   | 10 | -0.18 | 0.64 | 0.64 | -0.28 | 0.62 | 0.53  | 0.8 | -2   | 4.03  | 1173.48 | 0.61 | 0.29 | 0.14 |
| 707 | LSQLLKIDIG  | 10 | -0.1  | 0.64 | 0.64 | 0.03  | 0.49 | 0.23  | 0.7 | -1   | 4.21  | 1101.42 | 0.99 | 0.31 | 0.26 |
| 708 | SQLLKIDIGY  | 10 | -0.15 | 0.66 | 0.66 | -0.48 | 0.49 | 0.18  | 0.8 | -1   | 4.21  | 1151.43 | 0.99 | 0.27 | 0.07 |
| 709 | QLLKIDIGYG  | 10 | -0.11 | 0.67 | 0.67 | -0.44 | 0.49 | 0.15  | 0.7 | -1   | 4.21  | 1121.41 | 0.94 | 0.29 | 0.05 |
| 710 | LLKIDIGYGG  | 10 | -0.02 | 0.67 | 0.67 | -0.13 | 0.37 | 0.13  | 0.5 | -1   | 4.21  | 1050.33 | 0.99 | 0.44 | 0.20 |
| 711 | LKIDIGYGGI  | 10 | -0.01 | 0.69 | 0.69 | -0.06 | 0.37 | 0.13  | 0.5 | -1   | 4.21  | 1050.33 | 0.99 | 0.38 | 0.05 |
| 712 | KDIDYGGGIA  | 10 | -0.03 | 0.69 | 0.69 | -0.26 | 0.37 | 0.26  | 0.5 | -1   | 4.21  | 1008.24 | 0.99 | 0.45 | 0.06 |
| 713 | DIDYGGGIAL  | 10 | 0.13  | 0.67 | 0.67 | 0.51  | 0    | -0.22 | 0.3 | -2   | 3.57  | 993.23  | 0.61 | 0.63 | 0.15 |
| 714 | IDYGGGIALP  | 10 | 0.2   | 0.63 | 0.63 | 0.7   | 0    | -0.52 | 0.2 | -1   | 3.8   | 975.26  | 0.99 | 0.70 | 0.62 |
| 715 | DYGGGIALPE  | 10 | 0.06  | 0.63 | 0.63 | -0.1  | 0.13 | -0.04 | 0.3 | -2   | 3.67  | 991.21  | 0.86 | 0.70 | 0.16 |
| 716 | YGGGIALPEL  | 10 | 0.18  | 0.61 | 0.61 | 0.63  | 0.13 | -0.52 | 0.2 | -1   | 4     | 989.29  | 0.98 | 0.67 | 0.76 |
| 717 | YGGIALPELI  | 10 | 0.24  | 0.61 | 0.61 | 1.12  | 0.13 | -0.7  | 0.2 | -1   | 4     | 1045.4  | 0.99 | 0.69 | 0.63 |
| 718 | GGIALPELIC  | 10 | 0.24  | 0.6  | 0.6  | 1.5   | 0.13 | -0.57 | 0.1 | -1   | 4     | 985.36  | 0.98 | 0.66 | 0.93 |
| 719 | GIALPELICT  | 10 | 0.21  | 0.59 | 0.59 | 1.47  | 0.13 | -0.61 | 0.2 | -1   | 4     | 1029.41 | 0.98 | 0.67 | 0.71 |
| 720 | IALPELICTM  | 10 | 0.22  | 0.6  | 0.6  | 1.7   | 0.13 | -0.74 | 0.2 | -1   | 4     | 1103.55 | 0.99 | 0.67 | 0.67 |
| 721 | ALPELICTMF  | 10 | 0.21  | 0.6  | 0.6  | 1.53  | 0.13 | -0.81 | 0.2 | -1   | 4     | 1137.56 | 0.61 | 0.67 | 0.26 |
| 722 | LPELICTMFH  | 10 | 0.14  | 0.54 | 0.54 | 1.03  | 0.27 | -0.81 | 0.3 | -0.5 | 5.25  | 1203.63 | 0.97 | 0.65 | 0.23 |
| 723 | PELICTMFHT  | 10 | 0.07  | 0.54 | 0.54 | 0.58  | 0.27 | -0.67 | 0.4 | -0.5 | 5.25  | 1191.57 | 0.94 | 0.59 | 0.10 |
| 724 | ELICTMFHTS  | 10 | 0.05  | 0.56 | 0.56 | 0.66  | 0.27 | -0.64 | 0.5 | -0.5 | 5.25  | 1181.53 | 0.61 | 0.55 | 0.16 |
| 725 | LICTMFHTSG  | 10 | 0.13  | 0.56 | 0.56 | 0.97  | 0.14 | -0.94 | 0.4 | 0.5  | 7.06  | 1109.47 | 0.99 | 0.43 | 0.95 |
| 726 | ICTMFHTSGY  | 10 | 0.08  | 0.58 | 0.58 | 0.46  | 0.14 | -0.99 | 0.5 | 0.5  | 7.06  | 1159.48 | 0.99 | 0.39 | 0.91 |
| 727 | CTMFHTSGYD  | 10 | -0.07 | 0.58 | 0.58 | -0.34 | 0.14 | -0.51 | 0.6 | -0.5 | 5.09  | 1161.4  | 0.86 | 0.37 | 0.18 |
| 728 | TMFHTSGYDT  | 10 | -0.09 | 0.57 | 0.57 | -0.66 | 0.14 | -0.45 | 0.7 | -0.5 | 5.09  | 1159.37 | 0.99 | 0.34 | 0.12 |
| 729 | MFHTSGYDTQ  | 10 | -0.14 | 0.59 | 0.59 | -0.94 | 0.27 | -0.39 | 0.8 | -0.5 | 5.09  | 1186.4  | 0.98 | 0.31 | 0.10 |
| 730 | FHTSGYDTQAI | 10 | -0.14 | 0.56 | 0.56 | -0.95 | 0.27 | -0.31 | 0.8 | -0.5 | 5.09  | 1126.28 | 0.80 | 0.32 | 0.15 |
| 731 | HTSGYDTQAI  | 10 | -0.13 | 0.56 | 0.56 | -0.78 | 0.27 | -0.24 | 0.8 | -0.5 | 5.09  | 1092.27 | 0.99 | 0.24 | 0.09 |
| 732 | TSGYDTQAIV  | 10 | -0.03 | 0.63 | 0.63 | -0.04 | 0.12 | -0.34 | 0.7 | -1   | 3.8   | 1054.26 | 0.99 | 0.26 | 0.12 |
| 733 | SGYDTQAIVE  | 10 | -0.08 | 0.65 | 0.65 | -0.32 | 0.25 | 0     | 0.7 | -2   | 3.67  | 1082.27 | 0.99 | 0.32 | 0.10 |
| 734 | GYDTQAIVEN  | 10 | -0.11 | 0.67 | 0.67 | -0.59 | 0.25 | -0.01 | 0.8 | -2   | 3.67  | 1109.3  | 0.98 | 0.48 | 0.05 |
| 735 | YDTQAIVENN  | 10 | -0.19 | 0.68 | 0.68 | -0.9  | 0.25 | 0.01  | 1   | -2   | 3.67  | 1166.35 | 0.99 | 0.50 | 0.19 |
| 736 | DTQAIVENNE  | 10 | -0.26 | 0.68 | 0.68 | -1.12 | 0.38 | 0.54  | 1   | -3   | 3.58  | 1132.29 | 0.86 | 0.39 | 0.13 |
| 737 | TQAIVENNES  | 10 | -0.21 | 0.65 | 0.65 | -0.85 | 0.38 | 0.27  | 1   | -2   | 3.8   | 1104.28 | 0.99 | 0.41 | 0.11 |
| 738 | QAIVENNEST  | 10 | -0.21 | 0.65 | 0.65 | -0.85 | 0.38 | 0.27  | 1   | -2   | 3.8   | 1104.28 | 0.99 | 0.38 | 0.11 |
| 739 | AIVENNESTE  | 10 | -0.21 | 0.65 | 0.65 | -0.85 | 0.38 | 0.55  | 0.9 | -3   | 3.68  | 1105.26 | 0.61 | 0.41 | 0.06 |
| 740 | IVENNESTEY  | 10 | -0.23 | 0.67 | 0.67 | -1.16 | 0.38 | 0.37  | 1   | -3   | 3.68  | 1197.36 | 0.94 | 0.46 | 0.05 |
| 741 | VENNESTEYG  | 10 | -0.29 | 0.67 | 0.67 | -1.65 | 0.38 | 0.55  | 1   | -3   | 3.68  | 1141.25 | 0.99 | 0.41 | 0.05 |
| 742 | ENNESTEYGL  | 10 | -0.29 | 0.65 | 0.65 | -1.69 | 0.38 | 0.52  | 1   | -3   | 3.68  | 1155.28 | 0.61 | 0.29 | 0.11 |
| 743 | NNESTEYGLF  | 10 | -0.16 | 0.66 | 0.66 | -1.06 | 0.25 | -0.03 | 0.9 | -2   | 3.8   | 1173.34 | 0.94 | 0.43 | 0.10 |
| 744 | NESTEYGLFQ  | 10 | -0.17 | 0.65 | 0.65 | -1.06 | 0.38 | -0.03 | 0.9 | -2   | 3.8   | 1187.37 | 0.99 | 0.43 | 0.16 |
| 745 | ESTEYGLFQI  | 10 | -0.03 | 0.64 | 0.64 | -0.26 | 0.38 | -0.23 | 0.7 | -2   | 3.8   | 1186.43 | 0.61 | 0.52 | 0.17 |
| 746 | STEYGLFQIS  | 10 | 0     | 0.63 | 0.63 | 0.01  | 0.25 | -0.5  | 0.7 | -1   | 4     | 1144.39 | 0.99 | 0.52 | 0.38 |
| 747 | TEYGLFQISN  | 10 | -0.03 | 0.65 | 0.65 | -0.26 | 0.25 | -0.51 | 0.8 | -1   | 4     | 1171.42 | 0.99 | 0.52 | 0.13 |
| 748 | EYGLFQISNK  | 10 | -0.13 | 0.66 | 0.66 | -0.58 | 0.62 | -0.17 | 0.9 | 0    | 6.35  | 1198.49 | 0.61 | 0.56 | 0.42 |
| 749 | YGLFQISNKL  | 10 | -0.01 | 0.65 | 0.65 | 0.15  | 0.49 | -0.65 | 0.8 | 1    | 8.94  | 1182.54 | 0.99 | 0.66 | 0.75 |
| 750 | GLFQISNKLW  | 10 | 0.02  | 0.63 | 0.63 | 0.19  | 0.49 | -0.76 | 0.8 | 1    | 9.11  | 1205.58 | 0.98 | 0.64 | 0.99 |
| 751 | LFQISNKLWC  | 10 | 0.01  | 0.62 | 0.62 | 0.48  | 0.49 | -0.86 | 0.8 | 1    | 8.57  | 1251.66 | 0.94 | 0.69 | 0.97 |
| 752 | FQISNKLWCK  | 10 | -0.15 | 0.64 | 0.64 | -0.29 | 0.86 | -0.38 | 1   | 2    | 9.36  | 1266.67 | 0.61 | 0.55 | 0.98 |
| 753 | QISNKLWCKS  | 10 | -0.24 | 0.62 | 0.62 | -0.65 | 0.86 | -0.1  | 1.1 | 2    | 9.36  | 1206.57 | 0.99 | 0.61 | 0.78 |
| 754 | ISNKLWCKSS  | 10 | -0.2  | 0.61 | 0.61 | -0.38 | 0.73 | -0.09 | 1   | 2    | 9.36  | 1165.51 | 0.99 | 0.62 | 0.68 |
| 755 | SNKLWCKSSQ  | 10 | -0.34 | 0.6  | 0.6  | -1.18 | 0.86 | 0.11  | 1.2 | 2    | 9.36  | 1180.48 | 0.99 | 0.56 | 0.73 |
| 756 | NKLWCKSSQP  | 10 | -0.26 | 0.62 | 0.62 | -0.68 | 0.86 | -0.07 | 1.1 | 2    | 9.36  | 1192.54 | 0.99 | 0.57 | 0.59 |
| 757 | KLWCKSSQVP  | 10 | -0.2  | 0.58 | 0.58 | -0.49 | 0.86 | -0.09 | 0.9 | 2    | 9.36  | 1175.55 | 0.99 | 0.58 | 0.98 |
| 758 | LWCKSSQVPQ  | 10 | -0.16 | 0.58 | 0.58 | -0.45 | 0.62 | -0.37 | 0.9 | 1    | 8.57  | 1175.51 | 0.99 | 0.47 | 0.78 |
| 759 | WCKSSQVPQS  | 10 | -0.24 | 0.58 | 0.58 | -0.91 | 0.62 | -0.16 | 1   | 1    | 8.57  | 1149.42 | 0.99 | 0.47 | 0.50 |
| 760 | CKSSQVPQSR  | 10 | -0.45 | 0.6  | 0.6  | -1.27 | 0.86 | 0.48  | 1.3 | 2    | 9.55  | 1119.39 | 0.86 | 0.42 | 0.05 |
| 761 | KSSQVPQSRN  | 10 | -0.52 | 0.61 | 0.61 | -1.87 | 0.86 | 0.6   | 1.5 | 2    | 11.01 | 1130.36 | 0.99 | 0.48 | 0.06 |
| 762 | SSQVPQSRNI  | 10 | -0.34 | 0.61 | 0.61 | -1.03 | 0.49 | 0.12  | 1.3 | 1    | 10.11 | 1115.35 | 0.99 | 0.42 | 0.11 |
| 763 | SQVPQSRNIC  | 10 | -0.31 | 0.62 | 0.62 | -0.7  | 0.49 | -0.01 | 1.2 | 1    | 8.6   | 1131.41 | 0.99 | 0.44 | 0.50 |
| 764 | VQVPQSRNICD | 10 | -0.35 | 0.65 | 0.65 | -0.97 | 0.49 | 0.26  | 1.2 | 0    | 6.16  | 1159.42 | 0.99 | 0.48 | 0.09 |
| 765 | VPQSRNICDI  | 10 | -0.21 | 0.65 | 0.65 | -0.17 | 0.37 | 0.06  | 1   | 0    | 6.16  | 1144.45 | 0.99 | 0.47 | 0.17 |
| 766 | PQSRNICDIS  | 10 | -0.29 | 0.63 | 0.63 | -0.67 | 0.37 | 0.24  | 1.1 | 0    | 6.16  | 1132.39 | 0.94 | 0.44 | 0.11 |

|     |              |    |       |      |      |       |      |       |      |     |       |         |      |      |      |
|-----|--------------|----|-------|------|------|-------|------|-------|------|-----|-------|---------|------|------|------|
| 767 | QSRNICDISC   | 10 | -0.28 | 0.66 | 0.66 | -0.26 | 0.37 | 0.14  | 1.1  | 0   | 6.13  | 1138.41 | 0.99 | 0.49 | 0.95 |
| 768 | SRNICDISCD   | 10 | -0.28 | 0.67 | 0.67 | -0.26 | 0.25 | 0.42  | 1    | -1  | 4.21  | 1125.36 | 0.99 | 0.52 | 0.79 |
| 769 | RNICDISCDK   | 10 | -0.37 | 0.68 | 0.68 | -0.57 | 0.61 | 0.69  | 1.1  | 0   | 6.25  | 1166.46 | 0.99 | 0.48 | 0.72 |
| 770 | NICDISCDKF   | 10 | -0.13 | 0.68 | 0.68 | 0.16  | 0.37 | 0.14  | 0.7  | -1  | 4.21  | 1157.45 | 0.99 | 0.50 | 0.74 |
| 771 | ICDISCDKFL   | 10 | -0.01 | 0.66 | 0.66 | 0.89  | 0.37 | -0.06 | 0.5  | -1  | 4.21  | 1156.51 | 0.99 | 0.66 | 0.79 |
| 772 | CDISCDKFLD   | 10 | -0.16 | 0.67 | 0.67 | 0.09  | 0.37 | 0.42  | 0.6  | -2  | 3.94  | 1158.43 | 0.61 | 0.46 | 0.43 |
| 773 | DISCDKFLDD   | 10 | -0.23 | 0.68 | 0.68 | -0.51 | 0.37 | 0.82  | 0.7  | -3  | 3.77  | 1170.38 | 0.61 | 0.43 | 0.19 |
| 774 | ISCDKFLDDD   | 10 | -0.23 | 0.68 | 0.68 | -0.51 | 0.37 | 0.82  | 0.7  | -3  | 3.77  | 1170.38 | 0.99 | 0.40 | 0.24 |
| 775 | SCDKFLDDDI   | 10 | -0.23 | 0.68 | 0.68 | -0.51 | 0.37 | 0.82  | 0.7  | -3  | 3.77  | 1170.38 | 0.99 | 0.46 | 0.44 |
| 776 | CDKFLDDDDIT  | 10 | -0.23 | 0.68 | 0.68 | -0.5  | 0.37 | 0.75  | 0.7  | -3  | 3.77  | 1184.41 | 0.61 | 0.47 | 0.06 |
| 777 | DKFLDDDDITD  | 10 | -0.3  | 0.69 | 0.69 | -1.1  | 0.37 | 1.15  | 0.8  | -4  | 3.66  | 1196.36 | 0.61 | 0.43 | 0.09 |
| 778 | KFLDDDDITDD  | 10 | -0.3  | 0.69 | 0.69 | -1.1  | 0.37 | 1.15  | 0.8  | -4  | 3.66  | 1196.36 | 0.99 | 0.51 | 0.10 |
| 779 | FLDDDDITDDI  | 10 | -0.12 | 0.7  | 0.7  | -0.26 | 0    | 0.67  | 0.6  | -5  | 3.25  | 1181.35 | 0.61 | 0.48 | 0.10 |
| 780 | LDDDDITDDIM  | 10 | -0.15 | 0.7  | 0.7  | -0.35 | 0    | 0.79  | 0.6  | -5  | 3.25  | 1165.37 | 0.99 | 0.28 | 0.08 |
| 781 | DDDDITDDIMC  | 10 | -0.2  | 0.71 | 0.71 | -0.48 | 0    | 0.87  | 0.6  | -5  | 3.25  | 1155.34 | 0.61 | 0.48 | 0.09 |
| 782 | DDITDDIMCA   | 10 | -0.11 | 0.69 | 0.69 | 0.05  | 0    | 0.52  | 0.5  | -4  | 3.33  | 1111.33 | 0.61 | 0.51 | 0.04 |
| 783 | DITDDIMCAK   | 10 | -0.14 | 0.68 | 0.68 | 0.01  | 0.37 | 0.52  | 0.6  | -2  | 3.94  | 1124.42 | 0.61 | 0.66 | 0.04 |
| 784 | ITDDIMCAKK   | 10 | -0.18 | 0.67 | 0.67 | -0.03 | 0.73 | 0.52  | 0.7  | 0   | 6.28  | 1137.51 | 0.99 | 0.71 | 0.48 |
| 785 | TDIMCAKKI    | 10 | -0.18 | 0.67 | 0.67 | -0.03 | 0.73 | 0.52  | 0.7  | 0   | 6.28  | 1137.51 | 0.99 | 0.74 | 0.40 |
| 786 | DDIMCAKKIL   | 10 | -0.11 | 0.67 | 0.67 | 0.42  | 0.73 | 0.38  | 0.6  | 0   | 6.28  | 1149.57 | 0.61 | 0.83 | 0.93 |
| 787 | DIMCAKKILD   | 10 | -0.11 | 0.67 | 0.67 | 0.42  | 0.73 | 0.38  | 0.6  | 0   | 6.28  | 1149.57 | 0.61 | 0.73 | 0.83 |
| 788 | IMCAKKILDI   | 10 | 0.03  | 0.67 | 0.67 | 1.22  | 0.73 | -0.1  | 0.5  | 1   | 8.54  | 1147.65 | 0.99 | 0.73 | 0.91 |
| 789 | MCAKKILDIK   | 10 | -0.15 | 0.67 | 0.67 | 0.38  | 1.1  | 0.38  | 0.7  | 2   | 9.25  | 1162.66 | 0.99 | 0.74 | 0.93 |
| 790 | CAKKILDIKG   | 10 | -0.16 | 0.66 | 0.66 | 0.15  | 1.1  | 0.51  | 0.7  | 2   | 9.25  | 1088.52 | 0.83 | 0.65 | 0.94 |
| 791 | AKKILDIKGI   | 10 | -0.09 | 0.66 | 0.66 | 0.35  | 1.1  | 0.43  | 0.7  | 2   | 9.72  | 1098.55 | 0.61 | 0.59 | 0.70 |
| 792 | KKILDIKID    | 10 | -0.19 | 0.69 | 0.69 | -0.18 | 1.1  | 0.78  | 0.8  | 1   | 8.83  | 1142.56 | 0.99 | 0.55 | 0.55 |
| 793 | KILDIKIDY    | 10 | -0.07 | 0.69 | 0.69 | 0.08  | 0.73 | 0.25  | 0.7  | 0   | 6.3   | 1177.56 | 0.99 | 0.43 | 0.30 |
| 794 | ILDIKIDYIW   | 10 | 0.07  | 0.67 | 0.67 | 0.38  | 0.37 | -0.39 | 0.6  | -1  | 4.21  | 1235.6  | 0.99 | 0.47 | 0.23 |
| 795 | LDIKIDYWYL   | 10 | 0.05  | 0.65 | 0.65 | 0.31  | 0.37 | -0.39 | 0.6  | -1  | 4.21  | 1235.6  | 0.99 | 0.45 | 0.35 |
| 796 | DIKIDYWLA    | 10 | 0.03  | 0.65 | 0.65 | 0.11  | 0.37 | -0.26 | 0.6  | -1  | 4.21  | 1193.51 | 0.61 | 0.53 | 0.34 |
| 797 | IKIDYWLAH    | 10 | 0.06  | 0.58 | 0.58 | 0.14  | 0.51 | -0.61 | 0.6  | 0.5 | 7.09  | 1215.57 | 0.97 | 0.53 | 0.61 |
| 798 | KGIDYWLAHK   | 10 | -0.13 | 0.57 | 0.57 | -0.7  | 0.88 | -0.13 | 0.8  | 1.5 | 8.84  | 1230.58 | 0.99 | 0.56 | 0.82 |
| 799 | GIDYWLAHKA   | 10 | 0.01  | 0.56 | 0.56 | -0.13 | 0.51 | -0.48 | 0.6  | 0.5 | 7.09  | 1173.48 | 0.98 | 0.76 | 0.90 |
| 800 | IDYWLAHKAL   | 10 | 0.05  | 0.54 | 0.54 | 0.29  | 0.51 | -0.66 | 0.6  | 0.5 | 7.09  | 1229.59 | 0.99 | 0.78 | 0.86 |
| 801 | DYWLAHKALC   | 10 | -0.02 | 0.54 | 0.54 | 0.09  | 0.51 | -0.58 | 0.6  | 0.5 | 7.06  | 1219.56 | 0.86 | 0.74 | 0.97 |
| 802 | YWLAHKALCT   | 10 | 0.03  | 0.51 | 0.51 | 0.37  | 0.51 | -0.92 | 0.6  | 1.5 | 8.54  | 1205.58 | 0.99 | 0.77 | 0.96 |
| 803 | WLAHKALCTE   | 10 | -0.03 | 0.51 | 0.51 | 0.15  | 0.64 | -0.39 | 0.6  | 0.5 | 7.06  | 1171.52 | 0.99 | 0.70 | 0.98 |
| 804 | LAHKALCTEK   | 10 | -0.18 | 0.53 | 0.53 | -0.15 | 1.01 | 0.25  | 0.7  | 1.5 | 8.54  | 1113.48 | 0.99 | 0.71 | 0.84 |
| 805 | AHKALCTEKL   | 10 | -0.18 | 0.53 | 0.53 | -0.15 | 1.01 | 0.25  | 0.7  | 1.5 | 8.54  | 1113.48 | 0.61 | 0.55 | 0.90 |
| 806 | HKALCTEKLE   | 10 | -0.27 | 0.55 | 0.55 | -0.68 | 1.13 | 0.6   | 0.8  | 0.5 | 7.07  | 1171.52 | 0.99 | 0.52 | 0.17 |
| 807 | KALCTEKLEQ   | 10 | -0.3  | 0.61 | 0.61 | -0.71 | 1.11 | 0.67  | 0.9  | 0   | 6.46  | 1162.51 | 0.99 | 0.49 | 0.23 |
| 808 | ALCTEKLEQW   | 10 | -0.15 | 0.59 | 0.59 | -0.41 | 0.75 | 0.03  | 0.8  | -1  | 4.54  | 1220.55 | 0.61 | 0.33 | 0.60 |
| 809 | LCTEKLEQWL   | 10 | -0.12 | 0.6  | 0.6  | -0.21 | 0.75 | -0.1  | 0.8  | -1  | 4.54  | 1262.64 | 0.99 | 0.16 | 0.59 |
| 810 | CTEKLEQWLC   | 10 | -0.17 | 0.61 | 0.61 | -0.34 | 0.75 | -0.02 | 0.8  | -1  | 4.54  | 1252.61 | 0.86 | 0.16 | 0.77 |
| 811 | TEKLEQWLCE   | 10 | -0.24 | 0.61 | 0.61 | -0.94 | 0.87 | 0.38  | 0.9  | -2  | 4.26  | 1278.59 | 0.99 | 0.14 | 0.11 |
| 812 | EKLEQWLCEK   | 10 | -0.33 | 0.63 | 0.63 | -1.26 | 1.24 | 0.72  | 1    | -1  | 4.79  | 1305.66 | 0.61 | 0.15 | 0.08 |
| 813 | KLEQWLCEKL   | 10 | -0.21 | 0.61 | 0.61 | -0.53 | 1.11 | 0.24  | 0.9  | 0   | 6.46  | 1289.71 | 0.99 | 0.22 | 0.79 |
| 814 | MRFFVPLFLVG  | 11 | 0.23  | 0.64 | 0.64 | 1.8   | 0.22 | -1.13 | 0.36 | 1   | 10.11 | 1325.84 | 0.93 | 0.71 | 0.99 |
| 815 | RFFVPLFLVGI  | 11 | 0.28  | 0.63 | 0.63 | 2.04  | 0.22 | -1.17 | 0.36 | 1   | 10.11 | 1307.81 | 0.98 | 0.74 | 0.92 |
| 816 | FFVPLFLVGIL  | 11 | 0.48  | 0.62 | 0.62 | 2.79  | 0    | -1.61 | 0    | 0   | 5.88  | 1264.79 | 0.94 | 0.76 | 0.98 |
| 817 | FVPLFLVGILF  | 11 | 0.48  | 0.62 | 0.62 | 2.79  | 0    | -1.61 | 0    | 0   | 5.88  | 1264.79 | 0.94 | 0.74 | 0.98 |
| 818 | VPLFLVGILFP  | 11 | 0.42  | 0.59 | 0.59 | 2.39  | 0    | -1.38 | 0    | 0   | 5.88  | 1214.73 | 0.99 | 0.69 | 0.93 |
| 819 | PLFLVGILFPA  | 11 | 0.4   | 0.57 | 0.57 | 2.17  | 0    | -1.29 | 0    | 0   | 5.88  | 1186.67 | 0.98 | 0.75 | 0.92 |
| 820 | LFLVGILFPAIL | 11 | 0.47  | 0.6  | 0.6  | 2.73  | 0    | -1.45 | 0    | 0   | 5.88  | 1202.72 | 0.97 | 0.66 | 0.86 |
| 821 | FLVGILFPAIL  | 11 | 0.47  | 0.6  | 0.6  | 2.73  | 0    | -1.45 | 0    | 0   | 5.88  | 1202.72 | 0.94 | 0.65 | 0.96 |
| 822 | LVGILFPAILA  | 11 | 0.44  | 0.59 | 0.59 | 2.64  | 0    | -1.27 | 0    | 0   | 5.88  | 1126.62 | 0.98 | 0.57 | 0.68 |
| 823 | VGILFPAILAK  | 11 | 0.29  | 0.6  | 0.6  | 1.94  | 0.33 | -0.84 | 0.18 | 1   | 9.11  | 1141.63 | 0.98 | 0.76 | 0.98 |
| 824 | GILFPAILAKQ  | 11 | 0.18  | 0.6  | 0.6  | 1.24  | 0.45 | -0.68 | 0.36 | 1   | 9.11  | 1170.63 | 0.95 | 0.73 | 0.98 |
| 825 | ILFPAILAKQF  | 11 | 0.22  | 0.6  | 0.6  | 1.53  | 0.45 | -0.91 | 0.36 | 1   | 9.11  | 1260.75 | 0.98 | 0.75 | 0.98 |
| 826 | LFPAILAKQFT  | 11 | 0.13  | 0.59 | 0.59 | 1.05  | 0.45 | -0.78 | 0.45 | 1   | 9.11  | 1248.69 | 0.98 | 0.73 | 0.91 |
| 827 | FPAILAKQFTK  | 11 | -0.01 | 0.6  | 0.6  | 0.35  | 0.78 | -0.35 | 0.64 | 2   | 10.02 | 1263.7  | 0.80 | 0.74 | 0.98 |
| 828 | PAILAKQFTKC  | 11 | -0.07 | 0.59 | 0.59 | 0.33  | 0.78 | -0.21 | 0.64 | 2   | 9.36  | 1219.66 | 0.93 | 0.73 | 0.95 |
| 829 | AILAKQFTKCE  | 11 | -0.12 | 0.62 | 0.62 | 0.15  | 0.9  | 0.06  | 0.73 | 1   | 8.54  | 1251.66 | 0.61 | 0.69 | 0.93 |
| 830 | ILAKQFTKCEL  | 11 | -0.09 | 0.62 | 0.62 | 0.34  | 0.9  | -0.05 | 0.73 | 1   | 8.54  | 1293.75 | 0.99 | 0.68 | 0.68 |

|     |              |    |       |      |      |       |      |       |      |      |       |         |      |      |      |
|-----|--------------|----|-------|------|------|-------|------|-------|------|------|-------|---------|------|------|------|
| 831 | LAKQFTKCELS  | 11 | -0.18 | 0.61 | 0.61 | -0.15 | 0.9  | 0.14  | 0.82 | 1    | 8.54  | 1267.66 | 0.99 | 0.60 | 0.83 |
| 832 | AKQFTKCELSQ  | 11 | -0.29 | 0.62 | 0.62 | -0.81 | 1.01 | 0.32  | 1    | 1    | 8.54  | 1282.63 | 0.61 | 0.54 | 0.31 |
| 833 | KQFTKCELSQL  | 11 | -0.27 | 0.62 | 0.62 | -0.63 | 1.01 | 0.2   | 1    | 1    | 8.54  | 1324.72 | 0.99 | 0.33 | 0.28 |
| 834 | QFTKCELSQLL  | 11 | -0.12 | 0.61 | 0.61 | 0.07  | 0.68 | -0.24 | 0.82 | 0    | 6.32  | 1309.71 | 0.94 | 0.33 | 0.41 |
| 835 | FTKCELSQLLK  | 11 | -0.16 | 0.61 | 0.61 | 0.04  | 0.9  | 0.02  | 0.82 | 1    | 8.54  | 1309.75 | 0.61 | 0.31 | 0.84 |
| 836 | TKCELSQLLKD  | 11 | -0.28 | 0.61 | 0.61 | -0.54 | 0.9  | 0.52  | 0.91 | 0    | 6.38  | 1277.66 | 0.99 | 0.33 | 0.55 |
| 837 | KCELSQLLKDI  | 11 | -0.19 | 0.63 | 0.63 | -0.06 | 0.9  | 0.39  | 0.82 | 0    | 6.38  | 1289.72 | 0.99 | 0.30 | 0.42 |
| 838 | CELSQLLKDID  | 11 | -0.16 | 0.64 | 0.64 | -0.03 | 0.56 | 0.39  | 0.73 | -2   | 4.03  | 1276.63 | 0.61 | 0.31 | 0.08 |
| 839 | ELSQLLKIDIG  | 11 | -0.15 | 0.64 | 0.64 | -0.29 | 0.56 | 0.48  | 0.73 | -2   | 4.03  | 1230.55 | 0.61 | 0.32 | 0.06 |
| 840 | LSQLLKIDIDGY | 11 | -0.09 | 0.64 | 0.64 | -0.09 | 0.45 | 0     | 0.73 | -1   | 4.21  | 1264.61 | 0.99 | 0.30 | 0.10 |
| 841 | SQLLKIDIDGYG | 11 | -0.12 | 0.66 | 0.66 | -0.47 | 0.45 | 0.16  | 0.73 | -1   | 4.21  | 1208.5  | 0.99 | 0.30 | 0.11 |
| 842 | QLLKIDIDGYGG | 11 | -0.09 | 0.67 | 0.67 | -0.44 | 0.45 | 0.14  | 0.64 | -1   | 4.21  | 1178.48 | 0.94 | 0.32 | 0.05 |
| 843 | LLKIDIDGYGGI | 11 | 0.04  | 0.67 | 0.67 | 0.29  | 0.33 | -0.05 | 0.45 | -1   | 4.21  | 1163.51 | 0.99 | 0.41 | 0.15 |
| 844 | LKDIDGYGGIA  | 11 | 0.02  | 0.67 | 0.67 | 0.11  | 0.33 | 0.07  | 0.45 | -1   | 4.21  | 1121.42 | 0.99 | 0.42 | 0.07 |
| 845 | KDIDGYGGIAL  | 11 | 0.02  | 0.67 | 0.67 | 0.11  | 0.33 | 0.07  | 0.45 | -1   | 4.21  | 1121.42 | 0.99 | 0.54 | 0.09 |
| 846 | DIDGYGGIALP  | 11 | 0.11  | 0.64 | 0.64 | 0.32  | 0    | -0.2  | 0.27 | -2   | 3.57  | 1090.36 | 0.61 | 0.63 | 0.34 |
| 847 | IDGYGGIALPE  | 11 | 0.12  | 0.64 | 0.64 | 0.32  | 0.12 | 0.27  | 0.27 | -2   | 3.67  | 1104.39 | 0.99 | 0.67 | 0.15 |
| 848 | DGYGGIALPEL  | 11 | 0.1   | 0.62 | 0.62 | 0.25  | 0.12 | -0.2  | 0.27 | -2   | 3.67  | 1104.39 | 0.86 | 0.66 | 0.17 |
| 849 | GYGGIALPELI  | 11 | 0.23  | 0.61 | 0.61 | 0.98  | 0.12 | -0.64 | 0.18 | -1   | 4     | 1102.47 | 0.98 | 0.66 | 0.82 |
| 850 | YGGIALPELIC  | 11 | 0.22  | 0.61 | 0.61 | 1.25  | 0.12 | -0.73 | 0.18 | -1   | 4     | 1148.55 | 0.99 | 0.67 | 0.88 |
| 851 | GGIALPELICT  | 11 | 0.21  | 0.59 | 0.59 | 1.3   | 0.12 | -0.55 | 0.18 | -1   | 4     | 1086.48 | 0.98 | 0.64 | 0.87 |
| 852 | GIALPELICTM  | 11 | 0.21  | 0.6  | 0.6  | 1.51  | 0.12 | -0.67 | 0.18 | -1   | 4     | 1160.62 | 0.98 | 0.68 | 0.68 |
| 853 | IALPELICTMF  | 11 | 0.26  | 0.6  | 0.6  | 1.8   | 0.12 | -0.9  | 0.18 | -1   | 4     | 1250.74 | 0.97 | 0.65 | 0.37 |
| 854 | ALPELICTMFH  | 11 | 0.15  | 0.54 | 0.54 | 1.1   | 0.25 | -0.78 | 0.27 | -0.5 | 5.25  | 1274.72 | 0.61 | 0.68 | 0.31 |
| 855 | LPELICTMFHT  | 11 | 0.11  | 0.54 | 0.54 | 0.87  | 0.25 | -0.77 | 0.36 | -0.5 | 5.25  | 1304.75 | 0.99 | 0.63 | 0.09 |
| 856 | PELICTMFHTS  | 11 | 0.04  | 0.54 | 0.54 | 0.45  | 0.25 | -0.58 | 0.45 | -0.5 | 5.25  | 1278.66 | 0.94 | 0.55 | 0.05 |
| 857 | ELICTMFHTSG  | 11 | 0.06  | 0.57 | 0.57 | 0.56  | 0.25 | -0.58 | 0.45 | -0.5 | 5.25  | 1238.6  | 0.61 | 0.41 | 0.15 |
| 858 | LICTMFHTSGY  | 11 | 0.12  | 0.57 | 0.57 | 0.76  | 0.13 | -1.06 | 0.45 | 0.5  | 7.06  | 1272.66 | 0.98 | 0.39 | 0.79 |
| 859 | ICTMFHTSGYD  | 11 | 0.01  | 0.59 | 0.59 | 0.1   | 0.13 | -0.63 | 0.55 | -0.5 | 5.09  | 1274.58 | 0.99 | 0.38 | 0.41 |
| 860 | CTMFHTSGYDT  | 11 | -0.08 | 0.58 | 0.58 | -0.37 | 0.13 | -0.5  | 0.64 | -0.5 | 5.09  | 1262.52 | 0.94 | 0.36 | 0.27 |
| 861 | TMFHTSGYDTQ  | 11 | -0.14 | 0.58 | 0.58 | -0.92 | 0.25 | -0.39 | 0.82 | -0.5 | 5.09  | 1287.52 | 0.98 | 0.35 | 0.11 |
| 862 | MFHTSGYDTQA  | 11 | -0.1  | 0.58 | 0.58 | -0.69 | 0.25 | -0.4  | 0.73 | -0.5 | 5.09  | 1257.49 | 0.98 | 0.32 | 0.08 |
| 863 | FHTSGYDTQAI  | 11 | -0.06 | 0.58 | 0.58 | -0.45 | 0.25 | -0.45 | 0.73 | -0.5 | 5.09  | 1239.46 | 0.80 | 0.28 | 0.09 |
| 864 | HTSGYDTQAIV  | 11 | -0.07 | 0.58 | 0.58 | -0.33 | 0.25 | -0.35 | 0.73 | -0.5 | 5.09  | 1191.42 | 0.99 | 0.29 | 0.09 |
| 865 | TSGYDTQAIVE  | 11 | -0.09 | 0.64 | 0.64 | -0.35 | 0.23 | -0.04 | 0.73 | -2   | 3.67  | 1183.39 | 0.98 | 0.31 | 0.09 |
| 866 | SGYDTQAIVEN  | 11 | -0.13 | 0.66 | 0.66 | -0.61 | 0.23 | 0.02  | 0.82 | -2   | 3.67  | 1196.39 | 0.93 | 0.35 | 0.07 |
| 867 | GYDTQAIVENN  | 11 | -0.16 | 0.68 | 0.68 | -0.85 | 0.23 | 0.01  | 0.91 | -2   | 3.67  | 1223.42 | 0.98 | 0.46 | 0.05 |
| 868 | YDTQAIVENNE  | 11 | -0.23 | 0.68 | 0.68 | -1.14 | 0.34 | 0.28  | 1    | -3   | 3.58  | 1295.48 | 0.99 | 0.38 | 0.08 |
| 869 | DTQAIVENNES  | 11 | -0.26 | 0.66 | 0.66 | -1.09 | 0.34 | 0.52  | 1    | -3   | 3.58  | 1219.38 | 0.61 | 0.38 | 0.07 |
| 870 | TQAIVENNEST  | 11 | -0.21 | 0.64 | 0.64 | -0.84 | 0.34 | 0.21  | 1    | -2   | 3.8   | 1205.4  | 0.99 | 0.39 | 0.21 |
| 871 | QAIVENNESTE  | 11 | -0.25 | 0.66 | 0.66 | -1.09 | 0.46 | 0.52  | 1    | -3   | 3.68  | 1233.41 | 0.99 | 0.39 | 0.06 |
| 872 | AIVENNESTEY  | 11 | -0.19 | 0.66 | 0.66 | -0.89 | 0.35 | 0.29  | 0.91 | -3   | 3.68  | 1268.45 | 0.61 | 0.46 | 0.05 |
| 873 | IVENNESTEYG  | 11 | -0.19 | 0.67 | 0.67 | -1.09 | 0.35 | 0.34  | 0.91 | -3   | 3.68  | 1254.43 | 0.94 | 0.51 | 0.05 |
| 874 | VENNESTEYGL  | 11 | -0.21 | 0.66 | 0.66 | -1.15 | 0.35 | 0.34  | 0.91 | -3   | 3.68  | 1254.43 | 0.99 | 0.39 | 0.09 |
| 875 | ENNESTEYGLF  | 11 | -0.21 | 0.66 | 0.66 | -1.28 | 0.35 | 0.25  | 0.91 | -3   | 3.68  | 1302.47 | 0.61 | 0.46 | 0.12 |
| 876 | NNESTEYGLFQ  | 11 | -0.21 | 0.66 | 0.66 | -1.28 | 0.34 | -0.01 | 1    | -2   | 3.8   | 1301.49 | 0.94 | 0.43 | 0.11 |
| 877 | NESTEYGLFQI  | 11 | -0.09 | 0.65 | 0.65 | -0.55 | 0.34 | -0.19 | 0.82 | -2   | 3.8   | 1300.55 | 0.99 | 0.48 | 0.15 |
| 878 | ESTEYGLFQIS  | 11 | -0.05 | 0.63 | 0.63 | -0.31 | 0.34 | -0.18 | 0.73 | -2   | 3.8   | 1273.52 | 0.61 | 0.53 | 0.17 |
| 879 | STEYGLFQISN  | 11 | -0.05 | 0.64 | 0.64 | -0.31 | 0.23 | -0.44 | 0.82 | -1   | 4     | 1258.51 | 0.99 | 0.49 | 0.11 |
| 880 | TEYGLFQISNK  | 11 | -0.13 | 0.65 | 0.65 | -0.59 | 0.56 | -0.19 | 0.91 | 0    | 6.35  | 1299.61 | 0.99 | 0.54 | 0.15 |
| 881 | EYGLFQISNKL  | 11 | -0.07 | 0.65 | 0.65 | -0.18 | 0.56 | -0.32 | 0.82 | 0    | 6.35  | 1311.67 | 0.61 | 0.65 | 0.48 |
| 882 | YGLFQISNKLW  | 11 | 0.02  | 0.64 | 0.64 | 0.05  | 0.45 | -0.9  | 0.82 | 1    | 8.94  | 1368.77 | 0.99 | 0.63 | 0.90 |
| 883 | GLFQISNKLWC  | 11 | 0.03  | 0.63 | 0.63 | 0.4   | 0.45 | -0.78 | 0.73 | 1    | 8.57  | 1308.73 | 0.98 | 0.64 | 0.97 |
| 884 | LFQISNKLWCK  | 11 | -0.09 | 0.63 | 0.63 | 0.08  | 0.78 | -0.51 | 0.91 | 2    | 9.36  | 1379.85 | 0.94 | 0.60 | 0.99 |
| 885 | FQISNKLWCKS  | 11 | -0.16 | 0.63 | 0.63 | -0.34 | 0.78 | -0.32 | 1    | 2    | 9.36  | 1353.76 | 0.61 | 0.57 | 0.96 |
| 886 | QISNKLWCKSS  | 11 | -0.24 | 0.61 | 0.61 | -0.66 | 0.78 | -0.06 | 1.09 | 2    | 9.36  | 1293.66 | 0.99 | 0.63 | 0.71 |
| 887 | ISNKLWCKSSQ  | 11 | -0.24 | 0.61 | 0.61 | -0.66 | 0.78 | -0.06 | 1.09 | 2    | 9.36  | 1293.66 | 0.99 | 0.63 | 0.49 |
| 888 | SNKLWCKSSQV  | 11 | -0.26 | 0.61 | 0.61 | -0.69 | 0.78 | -0.04 | 1.09 | 2    | 9.36  | 1279.63 | 0.99 | 0.57 | 0.22 |
| 889 | NKLWCKSSQVP  | 11 | -0.24 | 0.6  | 0.6  | -0.76 | 0.78 | -0.06 | 1    | 2    | 9.36  | 1289.67 | 0.99 | 0.56 | 0.96 |
| 890 | KLWCKSSQVPQ  | 11 | -0.24 | 0.59 | 0.59 | -0.76 | 0.89 | -0.06 | 1    | 2    | 9.36  | 1303.7  | 0.99 | 0.55 | 0.98 |
| 891 | LWCKSSQVPQS  | 11 | -0.17 | 0.58 | 0.58 | -0.48 | 0.56 | -0.31 | 0.91 | 1    | 8.57  | 1262.6  | 0.99 | 0.46 | 0.56 |
| 892 | WCKSSQVPQSR  | 11 | -0.38 | 0.59 | 0.59 | -1.24 | 0.78 | 0.13  | 1.27 | 2    | 9.55  | 1305.62 | 0.99 | 0.43 | 0.41 |
| 893 | CKSSQVPQSRN  | 11 | -0.47 | 0.61 | 0.61 | -1.47 | 0.78 | 0.45  | 1.36 | 2    | 9.55  | 1233.51 | 0.86 | 0.41 | 0.05 |
| 894 | KSSQVPQSRNI  | 11 | -0.41 | 0.62 | 0.62 | -1.29 | 0.78 | 0.38  | 1.36 | 2    | 11.01 | 1243.54 | 0.99 | 0.42 | 0.07 |



|     |              |    |       |      |      |       |      |       |      |       |       |         |      |      |      |
|-----|--------------|----|-------|------|------|-------|------|-------|------|-------|-------|---------|------|------|------|
| 895 | SSVQPQSRNIC  | 11 | -0.3  | 0.62 | 0.62 | -0.71 | 0.45 | 0.02  | 1.18 | 1     | 8.6   | 1218.5  | 0.99 | 0.42 | 0.25 |
| 896 | SQVQPQSRNICD | 11 | -0.34 | 0.64 | 0.64 | -0.95 | 0.45 | 0.26  | 1.18 | 0     | 6.16  | 1246.51 | 0.99 | 0.47 | 0.07 |
| 897 | QVPQSRNICDI  | 11 | -0.25 | 0.65 | 0.65 | -0.47 | 0.45 | 0.07  | 1.09 | 0     | 6.16  | 1272.6  | 0.99 | 0.49 | 0.11 |
| 898 | VPQSRNICDIS  | 11 | -0.21 | 0.64 | 0.64 | -0.23 | 0.34 | 0.08  | 1    | 0     | 6.16  | 1231.54 | 0.99 | 0.51 | 0.10 |
| 899 | PQSRNICDISC  | 11 | -0.26 | 0.63 | 0.63 | -0.38 | 0.34 | 0.13  | 1    | 0     | 6.13  | 1235.54 | 0.94 | 0.44 | 0.94 |
| 900 | QSRNICDISCD  | 11 | -0.32 | 0.67 | 0.67 | -0.55 | 0.34 | 0.4   | 1.09 | -1    | 4.21  | 1253.51 | 0.99 | 0.49 | 0.52 |
| 901 | SRNICDISCDK  | 11 | -0.36 | 0.67 | 0.67 | -0.59 | 0.56 | 0.65  | 1.09 | 0     | 6.25  | 1253.55 | 0.99 | 0.47 | 0.50 |
| 902 | RNICDISCDKF  | 11 | -0.28 | 0.68 | 0.68 | -0.26 | 0.56 | 0.4   | 1    | 0     | 6.25  | 1313.65 | 0.99 | 0.50 | 0.84 |
| 903 | NICDISCDKFL  | 11 | -0.07 | 0.67 | 0.67 | 0.49  | 0.33 | -0.04 | 0.64 | -1    | 4.21  | 1270.63 | 0.99 | 0.68 | 0.81 |
| 904 | ICDISCDKFLD  | 11 | -0.08 | 0.67 | 0.67 | 0.49  | 0.33 | 0.22  | 0.55 | -2    | 3.94  | 1271.61 | 0.99 | 0.48 | 0.59 |
| 905 | CDISCDKFLDD  | 11 | -0.21 | 0.67 | 0.67 | -0.24 | 0.33 | 0.65  | 0.64 | -3    | 3.77  | 1273.53 | 0.61 | 0.44 | 0.22 |
| 906 | DISCDKFLDDD  | 11 | -0.28 | 0.69 | 0.69 | -0.78 | 0.33 | 1.02  | 0.73 | -4    | 3.66  | 1285.48 | 0.61 | 0.44 | 0.18 |
| 907 | ISCDKFLDDDI  | 11 | -0.15 | 0.68 | 0.68 | -0.05 | 0.33 | 0.58  | 0.64 | -3    | 3.77  | 1283.56 | 0.99 | 0.44 | 0.20 |
| 908 | SCDKFLDDDDIT | 11 | -0.23 | 0.67 | 0.67 | -0.53 | 0.33 | 0.71  | 0.73 | -3    | 3.77  | 1271.5  | 0.99 | 0.49 | 0.27 |
| 909 | CDKFLDDDDITD | 11 | -0.27 | 0.69 | 0.69 | -0.77 | 0.33 | 0.95  | 0.73 | -4    | 3.66  | 1299.51 | 0.61 | 0.46 | 0.05 |
| 910 | DKFLDDDDITDD | 11 | -0.34 | 0.7  | 0.7  | -1.32 | 0.33 | 1.32  | 0.82 | -5    | 3.57  | 1311.46 | 0.61 | 0.45 | 0.12 |
| 911 | KFLDDDDITDDI | 11 | -0.21 | 0.69 | 0.69 | -0.59 | 0.33 | 0.88  | 0.73 | -4    | 3.66  | 1309.54 | 0.99 | 0.53 | 0.06 |
| 912 | FLDDDDITDDIM | 11 | -0.08 | 0.7  | 0.7  | -0.06 | 0    | 0.49  | 0.55 | -5    | 3.25  | 1312.56 | 0.61 | 0.48 | 0.04 |
| 913 | LDDDDITDDIMC | 11 | -0.14 | 0.7  | 0.7  | -0.09 | 0    | 0.63  | 0.55 | -5    | 3.25  | 1268.52 | 0.99 | 0.31 | 0.05 |
| 914 | DDDDITDDIMCA | 11 | -0.16 | 0.7  | 0.7  | -0.27 | 0    | 0.75  | 0.55 | -5    | 3.25  | 1226.43 | 0.61 | 0.52 | 0.05 |
| 915 | DDITDDIMCAK  | 11 | -0.2  | 0.69 | 0.69 | -0.31 | 0.33 | 0.75  | 0.64 | -3    | 3.77  | 1239.52 | 0.61 | 0.65 | 0.04 |
| 916 | DITDDIMCAKK  | 11 | -0.23 | 0.68 | 0.68 | -0.35 | 0.67 | 0.75  | 0.73 | -1    | 4.43  | 1252.61 | 0.86 | 0.72 | 0.14 |
| 917 | ITDDIMCAKKI  | 11 | -0.1  | 0.68 | 0.68 | 0.38  | 0.67 | 0.31  | 0.64 | 0     | 6.28  | 1250.69 | 0.99 | 0.74 | 0.49 |
| 918 | TDDIMCAKKIL  | 11 | -0.12 | 0.66 | 0.66 | 0.32  | 0.67 | 0.31  | 0.64 | 0     | 6.28  | 1250.69 | 0.99 | 0.82 | 0.79 |
| 919 | DDIMCAKKILD  | 11 | -0.17 | 0.68 | 0.68 | 0.06  | 0.67 | 0.62  | 0.64 | -1    | 4.43  | 1264.67 | 0.61 | 0.73 | 0.38 |
| 920 | DIMCAKKILDI  | 11 | -0.03 | 0.68 | 0.68 | 0.79  | 0.67 | 0.18  | 0.55 | 0     | 6.28  | 1262.75 | 0.61 | 0.74 | 0.68 |
| 921 | IMCAKKILDIK  | 11 | -0.07 | 0.67 | 0.67 | 0.75  | 1    | 0.18  | 0.64 | 2     | 9.25  | 1275.84 | 0.99 | 0.72 | 0.97 |
| 922 | MCAKKILDIKG  | 11 | -0.12 | 0.67 | 0.67 | 0.31  | 1    | 0.35  | 0.64 | 2     | 9.25  | 1219.73 | 0.99 | 0.61 | 0.92 |
| 923 | CAKKILDIKGI  | 11 | -0.08 | 0.66 | 0.66 | 0.55  | 1    | 0.3   | 0.64 | 2     | 9.25  | 1201.7  | 0.83 | 0.55 | 0.89 |
| 924 | AKKILDIKGID  | 11 | -0.15 | 0.67 | 0.67 | 0     | 1    | 0.66  | 0.73 | 1     | 8.83  | 1213.65 | 0.61 | 0.52 | 0.81 |
| 925 | KKILDIKGIDY  | 11 | -0.17 | 0.69 | 0.69 | -0.28 | 1    | 0.5   | 0.82 | 1     | 8.76  | 1305.75 | 0.99 | 0.51 | 0.41 |
| 926 | KILDIKGIDYW  | 11 | -0.03 | 0.67 | 0.67 | -0.01 | 0.67 | -0.08 | 0.73 | 0     | 6.3   | 1363.79 | 0.99 | 0.51 | 0.30 |
| 927 | ILDIKGIDYWL  | 11 | 0.11  | 0.66 | 0.66 | 0.69  | 0.33 | -0.52 | 0.55 | -1    | 4.21  | 1348.78 | 0.99 | 0.47 | 0.33 |
| 928 | LDIKGIDYWLA  | 11 | 0.07  | 0.64 | 0.64 | 0.45  | 0.33 | -0.4  | 0.55 | -1    | 4.21  | 1306.69 | 0.99 | 0.46 | 0.38 |
| 929 | DIKGIDYWLAH  | 11 | -0.01 | 0.59 | 0.59 | -0.19 | 0.47 | -0.28 | 0.64 | -0.5  | 5.22  | 1330.67 | 0.86 | 0.53 | 0.13 |
| 930 | IKGIDYWLAHK  | 11 | -0.05 | 0.59 | 0.59 | -0.23 | 0.8  | -0.28 | 0.73 | 1.5   | 8.84  | 1343.76 | 0.99 | 0.54 | 0.78 |
| 931 | KGIDYWLAHKA  | 11 | -0.09 | 0.57 | 0.57 | -0.47 | 0.8  | -0.16 | 0.73 | 1.5   | 8.84  | 1301.67 | 0.99 | 0.65 | 0.94 |
| 932 | GIDYWLAHKAL  | 11 | 0.06  | 0.56 | 0.56 | 0.23  | 0.47 | -0.6  | 0.55 | 0.5   | 7.09  | 1286.66 | 0.98 | 0.80 | 0.87 |
| 933 | IDYWLAHKALC  | 11 | 0.05  | 0.55 | 0.55 | 0.49  | 0.47 | -0.69 | 0.55 | 0.5   | 7.06  | 1332.74 | 0.97 | 0.72 | 0.95 |
| 934 | DYWLAHKALCT  | 11 | -0.04 | 0.54 | 0.54 | 0.02  | 0.47 | -0.56 | 0.64 | 0.5   | 7.06  | 1320.68 | 0.86 | 0.76 | 0.95 |
| 935 | YWLAHKALCTE  | 11 | -0.03 | 0.53 | 0.53 | 0.02  | 0.58 | -0.56 | 0.64 | 0.5   | 7.06  | 1334.71 | 0.99 | 0.74 | 0.98 |
| 936 | WLAHKALCTEK  | 11 | -0.13 | 0.53 | 0.53 | -0.22 | 0.91 | -0.08 | 0.73 | 1.5   | 8.54  | 1299.71 | 0.99 | 0.66 | 0.96 |
| 937 | LAHKALCTEKL  | 11 | -0.12 | 0.53 | 0.53 | 0.21  | 0.91 | 0.06  | 0.64 | 1.5   | 8.54  | 1226.66 | 0.99 | 0.67 | 0.96 |
| 938 | AHKALCTEKLE  | 11 | -0.22 | 0.54 | 0.54 | -0.45 | 1.03 | 0.5   | 0.73 | 0.5   | 7.07  | 1242.61 | 0.61 | 0.53 | 0.47 |
| 939 | HKALCTEKLEQ  | 11 | -0.31 | 0.56 | 0.56 | -0.94 | 1.14 | 0.56  | 0.91 | 0.5   | 7.07  | 1299.67 | 0.99 | 0.46 | 0.18 |
| 940 | KALCTEKLEQW  | 11 | -0.24 | 0.6  | 0.6  | -0.73 | 1.01 | 0.3   | 0.91 | 0     | 6.46  | 1348.74 | 0.99 | 0.47 | 0.49 |
| 941 | ALCTEKLEQWL  | 11 | -0.09 | 0.59 | 0.59 | -0.03 | 0.68 | -0.14 | 0.73 | -1    | 4.54  | 1333.73 | 0.61 | 0.25 | 0.76 |
| 942 | LCTEKLEQWLC  | 11 | -0.11 | 0.6  | 0.6  | 0.04  | 0.68 | -0.18 | 0.73 | -1    | 4.54  | 1365.79 | 0.99 | 0.19 | 0.76 |
| 943 | CTEKLEQWLCE  | 11 | -0.21 | 0.61 | 0.61 | -0.63 | 0.79 | 0.25  | 0.82 | -2    | 4.26  | 1381.74 | 0.61 | 0.18 | 0.13 |
| 944 | TEKLEQWLCEK  | 11 | -0.31 | 0.62 | 0.62 | -1.21 | 1.13 | 0.62  | 1    | -1.21 | 4.79  | 1406.78 | 0.99 | 0.16 | 0.07 |
| 945 | EKLEQWLCEKL  | 11 | -0.25 | 0.62 | 0.62 | -0.8  | 1.13 | 0.49  | 0.91 | -1    | 4.79  | 1418.84 | 0.61 | 0.20 | 0.27 |
| 946 | MRFFVPLFLVGI | 12 | 0.27  | 0.65 | 0.65 | 2.02  | 0.2  | -1.18 | 0.33 | 1     | 10.11 | 1439.02 | 0.93 | 0.68 | 0.93 |
| 947 | RFFVPLFLVGIL | 12 | 0.3   | 0.63 | 0.63 | 2.18  | 0.2  | -1.23 | 0.33 | 1     | 10.11 | 1420.99 | 0.98 | 0.73 | 0.99 |
| 948 | FFVPLFLVGILF | 12 | 0.49  | 0.63 | 0.63 | 2.79  | 0    | -1.68 | 0    | 0     | 5.88  | 1411.98 | 0.94 | 0.71 | 0.98 |
| 949 | FVPLFLVGILFP | 12 | 0.44  | 0.6  | 0.6  | 2.43  | 0    | -1.48 | 0    | 0     | 5.88  | 1361.92 | 0.94 | 0.69 | 0.99 |
| 950 | VPLFLVGILFPA | 12 | 0.41  | 0.58 | 0.58 | 2.34  | 0    | -1.31 | 0    | 0     | 5.88  | 1285.82 | 0.98 | 0.69 | 0.82 |
| 951 | PLFLVGILFPAL | 12 | 0.42  | 0.58 | 0.58 | 2.37  | 0    | -1.33 | 0    | 0     | 5.88  | 1299.85 | 0.98 | 0.67 | 0.92 |
| 952 | LFLVGILFPAIL | 12 | 0.47  | 0.6  | 0.6  | 2.82  | 0    | -1.48 | 0    | 0     | 5.88  | 1315.9  | 0.93 | 0.62 | 0.78 |
| 953 | FLVGILFPAILA | 12 | 0.45  | 0.6  | 0.6  | 2.65  | 0    | -1.38 | 0    | 0     | 5.88  | 1273.81 | 0.94 | 0.69 | 0.94 |
| 954 | LVGILFPAILAK | 12 | 0.31  | 0.6  | 0.6  | 2.09  | 0.31 | -0.92 | 0.17 | 1     | 9.11  | 1254.81 | 0.98 | 0.67 | 0.97 |
| 955 | VGILFPAILAKQ | 12 | 0.21  | 0.61 | 0.61 | 1.48  | 0.41 | -0.75 | 0.33 | 1     | 9.11  | 1269.78 | 0.98 | 0.68 | 0.99 |
| 956 | GILFPAILAKQF | 12 | 0.21  | 0.61 | 0.61 | 1.37  | 0.41 | -0.83 | 0.33 | 1     | 9.11  | 1317.82 | 0.95 | 0.71 | 0.98 |
| 957 | ILFPAILAKQFT | 12 | 0.18  | 0.6  | 0.6  | 1.34  | 0.41 | -0.87 | 0.42 | 1     | 9.11  | 1361.87 | 0.98 | 0.72 | 0.97 |
| 958 | LFPAILAKQFTK | 12 | 0.03  | 0.59 | 0.59 | 0.64  | 0.72 | -0.47 | 0.58 | 2     | 10.02 | 1376.88 | 0.98 | 0.72 | 0.98 |

|      |               |    |       |      |      |       |      |       |      |      |      |         |      |      |      |
|------|---------------|----|-------|------|------|-------|------|-------|------|------|------|---------|------|------|------|
| 959  | FPAILAKQFTKC  | 12 | -0.01 | 0.6  | 0.6  | 0.53  | 0.72 | -0.4  | 0.58 | 2    | 9.36 | 1366.85 | 0.94 | 0.72 | 0.98 |
| 960  | PAILAKQFTKCE  | 12 | -0.11 | 0.6  | 0.6  | 0.01  | 0.82 | 0.06  | 0.67 | 1    | 8.54 | 1348.79 | 0.93 | 0.69 | 0.93 |
| 961  | AILAKQFTKCEL  | 12 | -0.06 | 0.61 | 0.61 | 0.46  | 0.82 | -0.09 | 0.67 | 1    | 8.54 | 1364.84 | 0.61 | 0.58 | 0.77 |
| 962  | ILAKQFTKCELS  | 12 | -0.11 | 0.62 | 0.62 | 0.24  | 0.82 | -0.02 | 0.75 | 1    | 8.54 | 1380.84 | 0.99 | 0.61 | 0.50 |
| 963  | LAKQFTKCELSQ  | 12 | -0.22 | 0.61 | 0.61 | -0.43 | 0.93 | 0.14  | 0.92 | 1    | 8.54 | 1395.81 | 0.99 | 0.57 | 0.80 |
| 964  | AKQFTKCELSQL  | 12 | -0.22 | 0.61 | 0.61 | -0.43 | 0.93 | 0.14  | 0.92 | 1    | 8.54 | 1395.81 | 0.61 | 0.44 | 0.28 |
| 965  | KQFTKCELSQLL  | 12 | -0.2  | 0.61 | 0.61 | -0.26 | 0.93 | 0.03  | 0.92 | 1    | 8.54 | 1437.9  | 0.99 | 0.38 | 0.59 |
| 966  | QFTKCELSQLLK  | 12 | -0.2  | 0.61 | 0.61 | -0.26 | 0.93 | 0.03  | 0.92 | 1    | 8.54 | 1437.9  | 0.94 | 0.36 | 0.42 |
| 967  | FTKCELSQLLKD  | 12 | -0.2  | 0.62 | 0.62 | -0.26 | 0.82 | 0.27  | 0.83 | 0    | 6.38 | 1424.85 | 0.61 | 0.31 | 0.73 |
| 968  | TKCELSQLLKDI  | 12 | -0.19 | 0.62 | 0.62 | -0.12 | 0.82 | 0.32  | 0.83 | 0    | 6.38 | 1390.84 | 0.99 | 0.35 | 0.24 |
| 969  | KCELSQLLKDID  | 12 | -0.24 | 0.64 | 0.64 | -0.35 | 0.82 | 0.61  | 0.83 | -1   | 4.56 | 1404.82 | 0.99 | 0.33 | 0.33 |
| 970  | CELSQLLKIDIG  | 12 | -0.13 | 0.64 | 0.64 | -0.06 | 0.52 | 0.36  | 0.67 | -2   | 4.03 | 1333.7  | 0.61 | 0.32 | 0.05 |
| 971  | ELSQLLKIDIDY  | 12 | -0.13 | 0.65 | 0.65 | -0.38 | 0.52 | 0.25  | 0.75 | -2   | 4.03 | 1393.74 | 0.61 | 0.29 | 0.04 |
| 972  | LSQLLKIDIDYG  | 12 | -0.07 | 0.65 | 0.65 | -0.12 | 0.41 | 0     | 0.67 | -1   | 4.21 | 1321.68 | 0.99 | 0.31 | 0.13 |
| 973  | SQLLKIDIDYGG  | 12 | -0.1  | 0.66 | 0.66 | -0.47 | 0.41 | 0.15  | 0.67 | -1   | 4.21 | 1265.57 | 0.99 | 0.31 | 0.10 |
| 974  | QLLKIDIDYGGI  | 12 | -0.02 | 0.67 | 0.67 | -0.03 | 0.41 | -0.03 | 0.58 | -1   | 4.21 | 1291.66 | 0.94 | 0.30 | 0.05 |
| 975  | LLKIDIDYGGIA  | 12 | 0.06  | 0.66 | 0.66 | 0.42  | 0.31 | -0.08 | 0.42 | -1   | 4.21 | 1234.6  | 0.99 | 0.42 | 0.24 |
| 976  | LKDIDYGGIAL   | 12 | 0.06  | 0.66 | 0.66 | 0.42  | 0.31 | -0.08 | 0.42 | -1   | 4.21 | 1234.6  | 0.99 | 0.49 | 0.12 |
| 977  | KDIDYGGIALP   | 12 | 0.01  | 0.65 | 0.65 | -0.03 | 0.31 | 0.07  | 0.42 | -1   | 4.21 | 1218.55 | 0.99 | 0.57 | 0.28 |
| 978  | DIDYGGIALPE   | 12 | 0.05  | 0.65 | 0.65 | 0     | 0.11 | 0.07  | 0.33 | -3   | 3.5  | 1219.49 | 0.61 | 0.63 | 0.13 |
| 979  | IDYGGIALPEL   | 12 | 0.15  | 0.63 | 0.63 | 0.61  | 0.11 | -0.33 | 0.25 | -2   | 3.67 | 1217.57 | 0.99 | 0.65 | 0.20 |
| 980  | DYGGIALPELI   | 12 | 0.15  | 0.63 | 0.63 | 0.61  | 0.11 | -0.33 | 0.25 | -2   | 3.67 | 1217.57 | 0.86 | 0.67 | 0.17 |
| 981  | YGGIALPELIC   | 12 | 0.22  | 0.62 | 0.62 | 1.11  | 0.11 | -0.67 | 0.17 | -1   | 4    | 1205.62 | 0.98 | 0.64 | 0.85 |
| 982  | YGGIALPELIC   | 12 | 0.19  | 0.6  | 0.6  | 1.08  | 0.11 | -0.7  | 0.25 | -1   | 4    | 1249.67 | 0.99 | 0.66 | 0.59 |
| 983  | GGIALPELIC    | 12 | 0.21  | 0.61 | 0.61 | 1.35  | 0.11 | -0.62 | 0.17 | -1   | 4    | 1217.69 | 0.98 | 0.64 | 0.81 |
| 984  | GIALPELIC     | 12 | 0.25  | 0.61 | 0.61 | 1.62  | 0.11 | -0.82 | 0.17 | -1   | 4    | 1307.81 | 0.98 | 0.68 | 0.59 |
| 985  | IALPELIC      | 12 | 0.2   | 0.55 | 0.55 | 1.38  | 0.23 | -0.87 | 0.25 | -0.5 | 5.25 | 1387.9  | 0.97 | 0.72 | 0.38 |
| 986  | ALPELIC       | 12 | 0.13  | 0.54 | 0.54 | 0.95  | 0.23 | -0.75 | 0.33 | -0.5 | 5.25 | 1375.84 | 0.61 | 0.66 | 0.20 |
| 987  | LPELIC        | 12 | 0.08  | 0.54 | 0.54 | 0.73  | 0.23 | -0.68 | 0.42 | -0.5 | 5.25 | 1391.84 | 0.99 | 0.56 | 0.07 |
| 988  | PELIC         | 12 | 0.05  | 0.55 | 0.55 | 0.38  | 0.23 | -0.53 | 0.42 | -0.5 | 5.25 | 1335.73 | 0.94 | 0.40 | 0.06 |
| 989  | ELICTMFHTSGY  | 12 | 0.06  | 0.58 | 0.58 | 0.41  | 0.23 | -0.72 | 0.5  | -0.5 | 5.25 | 1401.79 | 0.61 | 0.36 | 0.10 |
| 990  | LICTMFHTSGYD  | 12 | 0.05  | 0.59 | 0.59 | 0.41  | 0.12 | -0.72 | 0.5  | -0.5 | 5.09 | 1387.76 | 0.98 | 0.40 | 0.21 |
| 991  | ICTMFHTSGYDT  | 12 | -0.01 | 0.59 | 0.59 | 0.03  | 0.12 | -0.61 | 0.58 | -0.5 | 5.09 | 1375.7  | 0.98 | 0.39 | 0.41 |
| 992  | CTMFHTSGYDTQ  | 12 | -0.13 | 0.59 | 0.59 | -0.63 | 0.23 | -0.44 | 0.75 | -0.5 | 5.09 | 1390.67 | 0.94 | 0.37 | 0.17 |
| 993  | TMFHTSGYDTQA  | 12 | -0.11 | 0.58 | 0.58 | -0.69 | 0.23 | -0.4  | 0.75 | -0.5 | 5.09 | 1358.61 | 0.98 | 0.38 | 0.13 |
| 994  | MFHTSGYDTQAI  | 12 | -0.03 | 0.59 | 0.59 | -0.26 | 0.23 | -0.52 | 0.67 | -0.5 | 5.09 | 1370.67 | 0.98 | 0.29 | 0.12 |
| 995  | FHTSGYDTQAIV  | 12 | -0.01 | 0.59 | 0.59 | -0.07 | 0.23 | -0.53 | 0.67 | -0.5 | 5.09 | 1338.61 | 0.80 | 0.34 | 0.11 |
| 996  | HTSGYDTQAIVE  | 12 | -0.11 | 0.58 | 0.58 | -0.59 | 0.33 | -0.07 | 0.75 | -1.5 | 4.36 | 1320.55 | 0.98 | 0.34 | 0.06 |
| 997  | TSGYDTQAIVEN  | 12 | -0.13 | 0.65 | 0.65 | -0.62 | 0.21 | -0.02 | 0.83 | -2   | 3.67 | 1297.51 | 0.93 | 0.33 | 0.06 |
| 998  | SGYDTQAIVENN  | 12 | -0.17 | 0.67 | 0.67 | -0.85 | 0.21 | 0.03  | 0.92 | -2   | 3.67 | 1310.51 | 0.93 | 0.34 | 0.04 |
| 999  | GYDTQAIVENNE  | 12 | -0.2  | 0.68 | 0.68 | -1.07 | 0.32 | 0.26  | 0.92 | -3   | 3.58 | 1352.55 | 0.93 | 0.34 | 0.03 |
| 1000 | YDTQAIVENNES  | 12 | -0.24 | 0.67 | 0.67 | -1.11 | 0.32 | 0.28  | 1    | -3   | 3.58 | 1382.57 | 0.99 | 0.37 | 0.04 |
| 1001 | DTQAIVENNEST  | 12 | -0.25 | 0.65 | 0.65 | -1.06 | 0.32 | 0.44  | 1    | -3   | 3.58 | 1320.5  | 0.61 | 0.37 | 0.14 |
| 1002 | TQAIVENNESTE  | 12 | -0.24 | 0.65 | 0.65 | -1.06 | 0.42 | 0.44  | 1    | -3   | 3.68 | 1334.53 | 0.99 | 0.41 | 0.10 |
| 1003 | QAIVENNESTEY  | 12 | -0.23 | 0.66 | 0.66 | -1.11 | 0.42 | 0.28  | 1    | -3   | 3.68 | 1396.6  | 0.99 | 0.43 | 0.05 |
| 1004 | AIVENNESTEY   | 12 | -0.16 | 0.66 | 0.66 | -0.85 | 0.32 | 0.27  | 0.83 | -3   | 3.68 | 1325.52 | 0.61 | 0.47 | 0.04 |
| 1005 | IVENNESTEYGL  | 12 | -0.13 | 0.66 | 0.66 | -0.68 | 0.32 | 0.16  | 0.83 | -3   | 3.68 | 1367.61 | 0.94 | 0.44 | 0.08 |
| 1006 | VENNESTEYGLF  | 12 | -0.14 | 0.66 | 0.66 | -0.82 | 0.32 | 0.1   | 0.83 | -3   | 3.68 | 1401.62 | 0.99 | 0.46 | 0.09 |
| 1007 | ENNESTEYGLFQ  | 12 | -0.25 | 0.66 | 0.66 | -1.47 | 0.42 | 0.24  | 1    | -3   | 3.68 | 1430.62 | 0.61 | 0.42 | 0.13 |
| 1008 | NNESTEYGLFQI  | 12 | -0.13 | 0.66 | 0.66 | -0.8  | 0.32 | -0.16 | 0.92 | -2   | 3.8  | 1414.67 | 0.94 | 0.45 | 0.10 |
| 1009 | NESTEYGLFQIS  | 12 | -0.1  | 0.64 | 0.64 | -0.58 | 0.32 | -0.15 | 0.83 | -2   | 3.8  | 1387.64 | 0.99 | 0.47 | 0.16 |
| 1010 | ESTEYGLFQISN  | 12 | -0.1  | 0.64 | 0.64 | -0.58 | 0.32 | -0.15 | 0.83 | -2   | 3.8  | 1387.64 | 0.61 | 0.48 | 0.09 |
| 1011 | STEYGLFQISNKL | 12 | -0.14 | 0.64 | 0.64 | -0.61 | 0.52 | -0.15 | 0.92 | 0    | 6.35 | 1386.7  | 0.99 | 0.49 | 0.25 |
| 1012 | TEYGLFQISNKL  | 12 | -0.08 | 0.64 | 0.64 | -0.23 | 0.52 | -0.32 | 0.83 | 0    | 6.35 | 1412.79 | 0.99 | 0.60 | 0.22 |
| 1013 | EYGLFQISNKLW  | 12 | -0.03 | 0.64 | 0.64 | -0.24 | 0.52 | -0.57 | 0.83 | 0    | 6.35 | 1497.9  | 0.61 | 0.62 | 0.54 |
| 1014 | YGLFQISNKLWC  | 12 | 0.02  | 0.63 | 0.63 | 0.26  | 0.41 | -0.91 | 0.75 | 1    | 8.54 | 1471.92 | 0.99 | 0.64 | 0.97 |
| 1015 | GLFQISNKLWCK  | 12 | -0.07 | 0.63 | 0.63 | 0.04  | 0.72 | -0.47 | 0.83 | 2    | 9.36 | 1436.92 | 0.98 | 0.60 | 0.98 |
| 1016 | LFQISNKLWCKS  | 12 | -0.1  | 0.62 | 0.62 | 0.01  | 0.72 | -0.44 | 0.92 | 2    | 9.36 | 1466.94 | 0.94 | 0.61 | 0.97 |
| 1017 | FQISNKLWCKSS  | 12 | -0.17 | 0.62 | 0.62 | -0.38 | 0.72 | -0.27 | 1    | 2    | 9.36 | 1440.85 | 0.61 | 0.59 | 0.90 |
| 1018 | QISNKLWCKSSQ  | 12 | -0.28 | 0.62 | 0.62 | -0.9  | 0.82 | -0.04 | 1.17 | 2    | 9.36 | 1421.81 | 0.99 | 0.62 | 0.38 |
| 1019 | ISNKLWCKSSQV  | 12 | -0.18 | 0.62 | 0.62 | -0.26 | 0.72 | -0.18 | 1    | 2    | 9.36 | 1392.81 | 0.99 | 0.63 | 0.20 |
| 1020 | SNKLWCKSSQVP  | 12 | -0.24 | 0.59 | 0.59 | -0.77 | 0.72 | -0.03 | 1    | 2    | 9.36 | 1376.76 | 0.99 | 0.56 | 0.30 |
| 1021 | NKLWCKSSQVPQ  | 12 | -0.28 | 0.6  | 0.6  | -0.99 | 0.82 | -0.04 | 1.08 | 2    | 9.36 | 1417.82 | 0.99 | 0.54 | 0.88 |
| 1022 | KLWCKSSQVPQS  | 12 | -0.25 | 0.59 | 0.59 | -0.77 | 0.82 | -0.03 | 1    | 2    | 9.36 | 1390.79 | 0.99 | 0.54 | 0.75 |

|      |               |    |       |      |      |       |      |       |      |      |       |         |      |      |      |
|------|---------------|----|-------|------|------|-------|------|-------|------|------|-------|---------|------|------|------|
| 1023 | LWCKSSQVPQSR  | 12 | -0.3  | 0.59 | 0.59 | -0.82 | 0.72 | -0.03 | 1.17 | 2    | 9.55  | 1418.8  | 0.99 | 0.43 | 0.51 |
| 1024 | WCKSSQVPQSRN  | 12 | -0.4  | 0.6  | 0.6  | -1.43 | 0.72 | 0.13  | 1.33 | 2    | 9.55  | 1419.74 | 0.99 | 0.43 | 0.35 |
| 1025 | CKSSQVPQSRNI  | 12 | -0.37 | 0.62 | 0.62 | -0.98 | 0.72 | 0.27  | 1.25 | 2    | 9.55  | 1346.69 | 0.86 | 0.39 | 0.06 |
| 1026 | KSSQVPQSRNIC  | 12 | -0.37 | 0.62 | 0.62 | -0.98 | 0.72 | 0.27  | 1.25 | 2    | 9.55  | 1346.69 | 0.99 | 0.44 | 0.25 |
| 1027 | SSQVPQSRNICD  | 12 | -0.34 | 0.63 | 0.63 | -0.94 | 0.41 | 0.27  | 1.17 | 0    | 6.16  | 1333.6  | 0.99 | 0.47 | 0.06 |
| 1028 | SQVPQSRNICDI  | 12 | -0.25 | 0.64 | 0.64 | -0.5  | 0.41 | 0.09  | 1.08 | 0    | 6.16  | 1359.69 | 0.99 | 0.50 | 0.09 |
| 1029 | QVPQSRNICDIS  | 12 | -0.25 | 0.64 | 0.64 | -0.5  | 0.41 | 0.09  | 1.08 | 0    | 6.16  | 1359.69 | 0.99 | 0.53 | 0.07 |
| 1030 | VPQSRNICDISC  | 12 | -0.19 | 0.64 | 0.64 | 0     | 0.31 | -0.01 | 0.92 | 0    | 6.13  | 1334.69 | 0.99 | 0.48 | 0.95 |
| 1031 | PQSRNICDISCD  | 12 | -0.3  | 0.64 | 0.64 | -0.64 | 0.31 | 0.37  | 1    | -1   | 4.21  | 1350.64 | 0.94 | 0.43 | 0.60 |
| 1032 | QSRNICDISCDK  | 12 | -0.38 | 0.67 | 0.67 | -0.83 | 0.61 | 0.62  | 1.17 | 0    | 6.25  | 1381.7  | 0.99 | 0.44 | 0.33 |
| 1033 | SRNICDISCDKF  | 12 | -0.28 | 0.67 | 0.67 | -0.31 | 0.51 | 0.39  | 1    | 0    | 6.25  | 1400.74 | 0.99 | 0.51 | 0.63 |
| 1034 | RNICDISCDKFL  | 12 | -0.21 | 0.67 | 0.67 | 0.07  | 0.51 | 0.22  | 0.92 | 0    | 6.25  | 1426.83 | 0.99 | 0.66 | 0.89 |
| 1035 | NICDISCDKFLD  | 12 | -0.12 | 0.68 | 0.68 | 0.16  | 0.31 | 0.22  | 0.67 | -2   | 3.94  | 1385.73 | 0.99 | 0.46 | 0.53 |
| 1036 | ICDISCDKFLDD  | 12 | -0.13 | 0.68 | 0.68 | 0.16  | 0.31 | 0.45  | 0.58 | -3   | 3.77  | 1386.71 | 0.99 | 0.43 | 0.32 |
| 1037 | CDISCDKFLDDD  | 12 | -0.25 | 0.68 | 0.68 | -0.51 | 0.31 | 0.85  | 0.67 | -4   | 3.66  | 1388.63 | 0.61 | 0.42 | 0.18 |
| 1038 | DISCDKFLDDDI  | 12 | -0.19 | 0.69 | 0.69 | -0.34 | 0.31 | 0.78  | 0.67 | -4   | 3.66  | 1398.66 | 0.61 | 0.42 | 0.13 |
| 1039 | ISCDKFLDDDIT  | 12 | -0.15 | 0.67 | 0.67 | -0.11 | 0.31 | 0.5   | 0.67 | -3   | 3.77  | 1384.68 | 0.99 | 0.44 | 0.10 |
| 1040 | SCDKFLDDDITD  | 12 | -0.27 | 0.67 | 0.67 | -0.78 | 0.31 | 0.9   | 0.75 | -4   | 3.66  | 1386.6  | 0.99 | 0.44 | 0.19 |
| 1041 | CDKFLDDDITDD  | 12 | -0.31 | 0.69 | 0.69 | -1    | 0.31 | 1.12  | 0.75 | -5   | 3.57  | 1414.61 | 0.61 | 0.44 | 0.06 |
| 1042 | DKFLDDDITDDI  | 12 | -0.25 | 0.7  | 0.7  | -0.83 | 0.31 | 1.06  | 0.75 | -5   | 3.57  | 1424.64 | 0.61 | 0.43 | 0.07 |
| 1043 | KFLDDDITDDIM  | 12 | -0.17 | 0.7  | 0.7  | -0.38 | 0.31 | 0.7   | 0.67 | -4   | 3.66  | 1440.75 | 0.99 | 0.50 | 0.03 |
| 1044 | FLDDDITDDIMC  | 12 | -0.07 | 0.7  | 0.7  | 0.15  | 0    | 0.37  | 0.5  | -5   | 3.25  | 1415.71 | 0.61 | 0.49 | 0.05 |
| 1045 | LDDDITDDIMCA  | 12 | -0.1  | 0.68 | 0.68 | 0.07  | 0    | 0.53  | 0.5  | -5   | 3.25  | 1339.61 | 0.99 | 0.32 | 0.03 |
| 1046 | DDDITDDIMCAK  | 12 | -0.24 | 0.69 | 0.69 | -0.57 | 0.31 | 0.93  | 0.67 | -4   | 3.66  | 1354.62 | 0.61 | 0.64 | 0.03 |
| 1047 | DDITDDIMCAKK  | 12 | -0.27 | 0.69 | 0.69 | -0.61 | 0.61 | 0.93  | 0.75 | -2   | 4.14  | 1367.71 | 0.61 | 0.70 | 0.10 |
| 1048 | DITDDIMCAKKI  | 12 | -0.15 | 0.68 | 0.68 | 0.06  | 0.61 | 0.53  | 0.67 | -1   | 4.43  | 1365.79 | 0.86 | 0.71 | 0.23 |
| 1049 | ITDDIMCAKKIL  | 12 | -0.05 | 0.66 | 0.66 | 0.67  | 0.61 | 0.13  | 0.58 | 0    | 6.28  | 1363.87 | 0.99 | 0.77 | 0.95 |
| 1050 | TDDIMCAKKILD  | 12 | -0.17 | 0.67 | 0.67 | 0     | 0.61 | 0.53  | 0.67 | -1   | 4.43  | 1365.79 | 0.99 | 0.66 | 0.16 |
| 1051 | DDIMCAKKILDI  | 12 | -0.09 | 0.68 | 0.68 | 0.43  | 0.61 | 0.42  | 0.58 | -1   | 4.43  | 1377.85 | 0.61 | 0.69 | 0.46 |
| 1052 | DIMCAKKILDIK  | 12 | -0.12 | 0.68 | 0.68 | 0.4   | 0.92 | 0.42  | 0.67 | 1    | 8.51  | 1390.94 | 0.61 | 0.70 | 0.93 |
| 1053 | IMCAKKILDIKG  | 12 | -0.05 | 0.67 | 0.67 | 0.66  | 0.92 | 0.17  | 0.58 | 2    | 9.25  | 1332.91 | 0.99 | 0.57 | 0.96 |
| 1054 | MCAKKILDIKGI  | 12 | -0.05 | 0.67 | 0.67 | 0.66  | 0.92 | 0.17  | 0.58 | 2    | 9.25  | 1332.91 | 0.99 | 0.52 | 0.93 |
| 1055 | CAKKILDIKGID  | 12 | -0.13 | 0.67 | 0.67 | 0.21  | 0.92 | 0.53  | 0.67 | 1    | 8.51  | 1316.8  | 0.83 | 0.51 | 0.96 |
| 1056 | AKKILDIKGIDY  | 12 | -0.13 | 0.67 | 0.67 | -0.11 | 0.92 | 0.42  | 0.75 | 1    | 8.76  | 1376.84 | 0.61 | 0.51 | 0.79 |
| 1057 | KKILDIKGIDYW  | 12 | -0.12 | 0.67 | 0.67 | -0.33 | 0.92 | 0.18  | 0.83 | 1    | 8.76  | 1491.98 | 0.99 | 0.54 | 0.54 |
| 1058 | KILDIKGIDYWLA | 12 | 0.01  | 0.66 | 0.66 | 0.31  | 0.61 | -0.23 | 0.67 | 0    | 6.3   | 1476.97 | 0.99 | 0.49 | 0.44 |
| 1059 | ILDIKGIDYWLA  | 12 | 0.13  | 0.65 | 0.65 | 0.78  | 0.31 | -0.52 | 0.5  | -1   | 4.21  | 1419.87 | 0.99 | 0.49 | 0.45 |
| 1060 | LDIKGIDYWLAH  | 12 | 0.03  | 0.59 | 0.59 | 0.14  | 0.43 | -0.41 | 0.58 | -0.5 | 5.22  | 1443.85 | 0.99 | 0.45 | 0.25 |
| 1061 | DIKGIDYWLAHK  | 12 | -0.1  | 0.6  | 0.6  | -0.5  | 0.73 | -0.01 | 0.75 | 0.5  | 7.09  | 1458.86 | 0.86 | 0.53 | 0.27 |
| 1062 | IKGIDYWLAHKA  | 12 | -0.02 | 0.58 | 0.58 | -0.06 | 0.73 | -0.3  | 0.67 | 1.5  | 8.84  | 1414.85 | 0.97 | 0.59 | 0.87 |
| 1063 | KGIDYWLAHKAL  | 12 | -0.04 | 0.57 | 0.57 | -0.12 | 0.73 | -0.3  | 0.67 | 1.5  | 8.84  | 1414.85 | 0.99 | 0.64 | 0.89 |
| 1064 | GIDYWLAHKALC  | 12 | 0.06  | 0.56 | 0.56 | 0.42  | 0.43 | -0.63 | 0.5  | 0.5  | 7.06  | 1389.81 | 0.98 | 0.68 | 0.93 |
| 1065 | IDYWLAHKALCT  | 12 | 0.03  | 0.55 | 0.55 | 0.39  | 0.43 | -0.67 | 0.58 | 0.5  | 7.06  | 1433.86 | 0.97 | 0.71 | 0.92 |
| 1066 | DYWLAHKALCTE  | 12 | -0.09 | 0.55 | 0.55 | -0.28 | 0.53 | -0.27 | 0.67 | -0.5 | 5.33  | 1449.81 | 0.86 | 0.72 | 0.98 |
| 1067 | YWLAHKALCTEK  | 12 | -0.12 | 0.54 | 0.54 | -0.31 | 0.84 | -0.27 | 0.75 | 1.5  | 8.51  | 1462.9  | 0.99 | 0.67 | 0.95 |
| 1068 | WLAKALCTEKL   | 12 | -0.08 | 0.53 | 0.53 | 0.12  | 0.84 | -0.23 | 0.67 | 1.5  | 8.54  | 1412.89 | 0.99 | 0.59 | 0.99 |
| 1069 | LAHKALCTEKLE  | 12 | -0.16 | 0.54 | 0.54 | -0.1  | 0.94 | 0.31  | 0.67 | 0.5  | 7.07  | 1355.79 | 0.99 | 0.62 | 0.69 |
| 1070 | AHKALCTEKLEQ  | 12 | -0.26 | 0.55 | 0.55 | -0.71 | 1.05 | 0.48  | 0.83 | 0.5  | 7.07  | 1370.76 | 0.61 | 0.47 | 0.32 |
| 1071 | HKALCTEKLEQW  | 12 | -0.25 | 0.55 | 0.55 | -0.93 | 1.05 | 0.23  | 0.92 | 0.5  | 7.07  | 1485.9  | 0.99 | 0.42 | 0.43 |
| 1072 | KALCTEKLEQWL  | 12 | -0.17 | 0.6  | 0.6  | -0.35 | 0.93 | 0.13  | 0.83 | 0    | 6.46  | 1461.92 | 0.99 | 0.39 | 0.70 |
| 1073 | ALCTEKLEQWLC  | 12 | -0.08 | 0.59 | 0.59 | 0.18  | 0.62 | -0.21 | 0.67 | -1   | 4.54  | 1436.88 | 0.61 | 0.26 | 0.75 |
| 1074 | LCTEKLEQWLCE  | 12 | -0.15 | 0.6  | 0.6  | -0.26 | 0.73 | 0.08  | 0.75 | -2   | 4.26  | 1494.92 | 0.99 | 0.19 | 0.54 |
| 1075 | CTEKLEQWLCEK  | 12 | -0.28 | 0.62 | 0.62 | -0.9  | 1.03 | 0.48  | 0.92 | -1   | 4.79  | 1509.93 | 0.86 | 0.18 | 0.07 |
| 1076 | TEKLEQWLCEKL  | 12 | -0.24 | 0.61 | 0.61 | -0.79 | 1.03 | 0.42  | 0.92 | -1   | 4.79  | 1519.96 | 0.99 | 0.20 | 0.30 |
| 1077 | MRFVPLFLVGIL  | 13 | 0.29  | 0.64 | 0.64 | 2.16  | 0.19 | -1.23 | 0.31 | 1    | 10.11 | 1552.2  | 0.93 | 0.66 | 0.99 |
| 1078 | RFFVPLFLVGILF | 13 | 0.32  | 0.63 | 0.63 | 2.23  | 0.19 | -1.32 | 0.31 | 1    | 10.11 | 1568.18 | 0.93 | 0.67 | 0.95 |
| 1079 | FFVPLFLVGILFP | 13 | 0.45  | 0.61 | 0.61 | 2.45  | 0    | -1.55 | 0    | 0    | 5.88  | 1509.11 | 0.94 | 0.68 | 0.98 |
| 1080 | FVPLFLVGILFPA | 13 | 0.42  | 0.59 | 0.59 | 2.38  | 0    | -1.4  | 0    | 0    | 5.88  | 1433.01 | 0.94 | 0.71 | 0.97 |
| 1081 | VPLFLVGILFPAI | 13 | 0.43  | 0.59 | 0.59 | 2.51  | 0    | -1.35 | 0    | 0    | 5.88  | 1399    | 0.98 | 0.66 | 0.79 |
| 1082 | PLFLVGILFPAIL | 13 | 0.43  | 0.58 | 0.58 | 2.48  | 0    | -1.37 | 0    | 0    | 5.88  | 1413.03 | 0.98 | 0.66 | 0.87 |
| 1083 | LFLVGILFPAILA | 13 | 0.46  | 0.59 | 0.59 | 2.74  | 0    | -1.41 | 0    | 0    | 5.88  | 1386.99 | 0.98 | 0.66 | 0.71 |
| 1084 | FLVGILFPAILAK | 13 | 0.33  | 0.6  | 0.6  | 2.15  | 0.28 | -1.04 | 0.15 | 1    | 9.11  | 1402    | 0.94 | 0.74 | 0.98 |
| 1085 | LVGILFPAILAKQ | 13 | 0.23  | 0.6  | 0.6  | 1.66  | 0.38 | -0.83 | 0.31 | 1    | 9.11  | 1382.96 | 0.98 | 0.59 | 0.94 |
| 1086 | VGILFPAILAKQF | 13 | 0.24  | 0.62 | 0.62 | 1.58  | 0.38 | -0.88 | 0.31 | 1    | 9.11  | 1416.97 | 0.98 | 0.66 | 0.98 |

|      |                |    |       |      |      |       |      |       |      |      |       |         |      |      |      |
|------|----------------|----|-------|------|------|-------|------|-------|------|------|-------|---------|------|------|------|
| 1087 | GILFPAILAKQFT  | 13 | 0.18  | 0.6  | 0.6  | 1.21  | 0.38 | -0.8  | 0.38 | 1    | 9.11  | 1418.94 | 0.95 | 0.66 | 0.99 |
| 1088 | ILFPAILAKQFTK  | 13 | 0.08  | 0.6  | 0.6  | 0.94  | 0.66 | -0.57 | 0.54 | 2    | 10.02 | 1490.06 | 0.98 | 0.69 | 0.99 |
| 1089 | LFPAILAKQFTKC  | 13 | 0.03  | 0.6  | 0.6  | 0.78  | 0.66 | -0.51 | 0.54 | 2    | 9.36  | 1480.03 | 0.93 | 0.67 | 0.98 |
| 1090 | FPAILAKQFTKCE  | 13 | -0.06 | 0.61 | 0.61 | 0.22  | 0.76 | -0.14 | 0.62 | 1    | 8.54  | 1495.98 | 0.94 | 0.66 | 0.99 |
| 1091 | PAILAKQFTKCEL  | 13 | -0.06 | 0.59 | 0.59 | 0.3   | 0.76 | -0.08 | 0.62 | 1    | 8.54  | 1461.97 | 0.98 | 0.58 | 0.79 |
| 1092 | AILAKQFTKCELS  | 13 | -0.08 | 0.61 | 0.61 | 0.36  | 0.76 | -0.06 | 0.69 | 1    | 8.54  | 1451.93 | 0.61 | 0.53 | 0.80 |
| 1093 | ILAKQFTKCELSQ  | 13 | -0.15 | 0.62 | 0.62 | -0.05 | 0.85 | -0.01 | 0.85 | 1    | 8.54  | 1508.99 | 0.99 | 0.58 | 0.41 |
| 1094 | LAKQFTKCELSQL  | 13 | -0.17 | 0.61 | 0.61 | -0.1  | 0.85 | -0.01 | 0.85 | 1    | 8.54  | 1508.99 | 0.99 | 0.49 | 0.71 |
| 1095 | AKQFTKCELSQLL  | 13 | -0.17 | 0.61 | 0.61 | -0.1  | 0.85 | -0.01 | 0.85 | 1    | 8.54  | 1508.99 | 0.61 | 0.47 | 0.72 |
| 1096 | KQFTKCELSQLLK  | 13 | -0.27 | 0.62 | 0.62 | -0.54 | 1.14 | 0.26  | 1    | 2    | 9.25  | 1566.09 | 0.99 | 0.41 | 0.80 |
| 1097 | QFTKCELSQLLKD  | 13 | -0.24 | 0.63 | 0.63 | -0.51 | 0.85 | 0.26  | 0.92 | 0    | 6.38  | 1553    | 0.94 | 0.37 | 0.28 |
| 1098 | FTKCELSQLLKDI  | 13 | -0.13 | 0.63 | 0.63 | 0.11  | 0.76 | 0.11  | 0.77 | 0    | 6.38  | 1538.03 | 0.61 | 0.34 | 0.41 |
| 1099 | TKCELSQLLKDID  | 13 | -0.23 | 0.63 | 0.63 | -0.38 | 0.76 | 0.53  | 0.85 | -1   | 4.56  | 1505.94 | 0.99 | 0.39 | 0.15 |
| 1100 | KCELSQLLKDIDG  | 13 | -0.21 | 0.64 | 0.64 | -0.35 | 0.76 | 0.56  | 0.77 | -1   | 4.56  | 1461.89 | 0.99 | 0.36 | 0.07 |
| 1101 | CELSQLLKDIDGY  | 13 | -0.12 | 0.64 | 0.64 | -0.15 | 0.48 | 0.15  | 0.69 | -2   | 4.03  | 1496.89 | 0.61 | 0.31 | 0.05 |
| 1102 | ELSQLLKDIDGYG  | 13 | -0.11 | 0.65 | 0.65 | -0.38 | 0.48 | 0.23  | 0.69 | -2   | 4.03  | 1450.81 | 0.61 | 0.33 | 0.03 |
| 1103 | LSQLLKDIDGYGG  | 13 | -0.05 | 0.65 | 0.65 | -0.14 | 0.38 | 0     | 0.62 | -1   | 4.21  | 1378.75 | 0.99 | 0.34 | 0.16 |
| 1104 | SQLLKDIDGYGGI  | 13 | -0.04 | 0.66 | 0.66 | -0.08 | 0.38 | 0     | 0.62 | -1   | 4.21  | 1378.75 | 0.99 | 0.34 | 0.08 |
| 1105 | QLLKDIDGYGGIA  | 13 | 0     | 0.66 | 0.66 | 0.12  | 0.38 | -0.06 | 0.54 | -1   | 4.21  | 1362.75 | 0.94 | 0.37 | 0.07 |
| 1106 | LLKIDIDYGGIAL  | 13 | 0.1   | 0.65 | 0.65 | 0.68  | 0.28 | -0.22 | 0.38 | -1   | 4.21  | 1347.78 | 0.99 | 0.53 | 0.51 |
| 1107 | LKDIDYGGIALP   | 13 | 0.05  | 0.64 | 0.64 | 0.26  | 0.28 | -0.08 | 0.38 | -1   | 4.21  | 1331.73 | 0.99 | 0.56 | 0.33 |
| 1108 | KDIDYGGIALPE   | 13 | -0.04 | 0.65 | 0.65 | -0.3  | 0.38 | 0.29  | 0.46 | -2   | 4.03  | 1347.68 | 0.99 | 0.58 | 0.06 |
| 1109 | DIDYGGIALPEL   | 13 | 0.09  | 0.64 | 0.64 | 0.29  | 0.1  | -0.08 | 0.31 | -3   | 3.5   | 1332.67 | 0.61 | 0.62 | 0.12 |
| 1110 | IDYGGIALPELI   | 13 | 0.2   | 0.63 | 0.63 | 0.91  | 0.1  | -0.45 | 0.23 | -2   | 3.67  | 1330.75 | 0.97 | 0.63 | 0.24 |
| 1111 | DGYGGIALPELIC  | 13 | 0.15  | 0.63 | 0.63 | 0.75  | 0.1  | -0.38 | 0.23 | -2   | 3.67  | 1320.72 | 0.86 | 0.63 | 0.29 |
| 1112 | GYGGIALPELICT  | 13 | 0.19  | 0.61 | 0.61 | 0.97  | 0.1  | -0.65 | 0.23 | -1   | 4     | 1306.74 | 0.98 | 0.61 | 0.76 |
| 1113 | YGGIALPELICTM  | 13 | 0.2   | 0.62 | 0.62 | 1.15  | 0.1  | -0.75 | 0.23 | -1   | 4     | 1380.88 | 0.99 | 0.64 | 0.56 |
| 1114 | GGIALPELICTMF  | 13 | 0.24  | 0.62 | 0.62 | 1.46  | 0.1  | -0.76 | 0.15 | -1   | 4     | 1364.88 | 0.98 | 0.61 | 0.71 |
| 1115 | GIALPELICTMFH  | 13 | 0.2   | 0.56 | 0.56 | 1.25  | 0.21 | -0.8  | 0.23 | -0.5 | 5.25  | 1444.97 | 0.98 | 0.70 | 0.55 |
| 1116 | IALPELICTMFHT  | 13 | 0.17  | 0.55 | 0.55 | 1.22  | 0.21 | -0.83 | 0.31 | -0.5 | 5.25  | 1489.02 | 0.97 | 0.66 | 0.16 |
| 1117 | ALPELICTMFHTS  | 13 | 0.1   | 0.54 | 0.54 | 0.82  | 0.21 | -0.67 | 0.38 | -0.5 | 5.25  | 1462.93 | 0.61 | 0.54 | 0.19 |
| 1118 | LPELICTMFHTSG  | 13 | 0.09  | 0.55 | 0.55 | 0.65  | 0.21 | -0.63 | 0.38 | -0.5 | 5.25  | 1448.91 | 0.99 | 0.43 | 0.08 |
| 1119 | PELICTMFHTSGY  | 13 | 0.05  | 0.56 | 0.56 | 0.25  | 0.21 | -0.67 | 0.46 | -0.5 | 5.25  | 1498.92 | 0.94 | 0.33 | 0.06 |
| 1120 | ELICTMFHTSGYD  | 13 | 0     | 0.6  | 0.6  | 0.11  | 0.21 | -0.44 | 0.54 | -1.5 | 4.36  | 1516.89 | 0.80 | 0.33 | 0.05 |
| 1121 | LICTMFHTSGYDT  | 13 | 0.03  | 0.58 | 0.58 | 0.32  | 0.11 | -0.7  | 0.54 | -0.5 | 5.09  | 1488.88 | 0.98 | 0.37 | 0.10 |
| 1122 | ICTMFHTSGYDTQ  | 13 | -0.06 | 0.6  | 0.6  | -0.24 | 0.21 | -0.55 | 0.69 | -0.5 | 5.09  | 1503.85 | 0.93 | 0.39 | 0.38 |
| 1123 | CTMFHTSGYDTQA  | 13 | -0.1  | 0.58 | 0.58 | -0.45 | 0.21 | -0.45 | 0.69 | -0.5 | 5.09  | 1461.76 | 0.94 | 0.38 | 0.17 |
| 1124 | TMFHTSGYDTQAI  | 13 | -0.04 | 0.59 | 0.59 | -0.29 | 0.21 | -0.51 | 0.69 | -0.5 | 5.09  | 1471.79 | 0.98 | 0.32 | 0.12 |
| 1125 | MFHTSGYDTQAIV  | 13 | 0.01  | 0.6  | 0.6  | 0.08  | 0.21 | -0.59 | 0.62 | -0.5 | 5.09  | 1469.82 | 0.98 | 0.35 | 0.12 |
| 1126 | FHTSGYDTQAIVE  | 13 | -0.06 | 0.59 | 0.59 | -0.33 | 0.31 | -0.26 | 0.69 | -1.5 | 4.36  | 1467.74 | 0.94 | 0.38 | 0.13 |
| 1127 | HTSGYDTQAIVEN  | 13 | -0.15 | 0.6  | 0.6  | -0.82 | 0.31 | -0.05 | 0.85 | -1.5 | 4.36  | 1434.67 | 0.98 | 0.37 | 0.05 |
| 1128 | TSGYDTQAIVENN  | 13 | -0.17 | 0.66 | 0.66 | -0.84 | 0.19 | 0     | 0.92 | -2   | 3.67  | 1411.63 | 0.93 | 0.32 | 0.05 |
| 1129 | SGYDTQAIVENNE  | 13 | -0.21 | 0.67 | 0.67 | -1.05 | 0.29 | 0.26  | 0.92 | -3   | 3.58  | 1439.64 | 0.93 | 0.32 | 0.04 |
| 1130 | GYDTQAIVENNES  | 13 | -0.21 | 0.67 | 0.67 | -1.05 | 0.29 | 0.26  | 0.92 | -3   | 3.58  | 1439.64 | 0.83 | 0.33 | 0.03 |
| 1131 | YDTQAIVENNEST  | 13 | -0.23 | 0.66 | 0.66 | -1.08 | 0.29 | 0.23  | 1    | -3   | 3.58  | 1483.69 | 0.99 | 0.35 | 0.10 |
| 1132 | DTQAIVENNESTE  | 13 | -0.28 | 0.65 | 0.65 | -1.25 | 0.39 | 0.64  | 1    | -4   | 3.51  | 1449.63 | 0.61 | 0.38 | 0.06 |
| 1133 | TQAIVENNESTEY  | 13 | -0.22 | 0.65 | 0.65 | -1.08 | 0.39 | 0.23  | 1    | -3   | 3.68  | 1497.72 | 0.99 | 0.43 | 0.09 |
| 1134 | QAIVENNESTEYG  | 13 | -0.2  | 0.66 | 0.66 | -1.05 | 0.39 | 0.26  | 0.92 | -3   | 3.68  | 1453.67 | 0.99 | 0.42 | 0.04 |
| 1135 | AIVENNESTEYGL  | 13 | -0.1  | 0.65 | 0.65 | -0.49 | 0.29 | 0.11  | 0.77 | -3   | 3.68  | 1438.7  | 0.61 | 0.42 | 0.07 |
| 1136 | IVENNESTEYGLF  | 13 | -0.08 | 0.66 | 0.66 | -0.42 | 0.29 | -0.05 | 0.77 | -3   | 3.68  | 1514.8  | 0.94 | 0.48 | 0.09 |
| 1137 | VENNESTEYGLFQ  | 13 | -0.19 | 0.66 | 0.66 | -1.03 | 0.39 | 0.11  | 0.92 | -3   | 3.68  | 1529.77 | 0.99 | 0.43 | 0.09 |
| 1138 | ENNESTEYGLFQI  | 13 | -0.17 | 0.66 | 0.66 | -1.01 | 0.39 | 0.08  | 0.92 | -3   | 3.68  | 1543.8  | 0.61 | 0.44 | 0.13 |
| 1139 | NNESTEYGLFQIS  | 13 | -0.14 | 0.65 | 0.65 | -0.8  | 0.29 | -0.12 | 0.92 | -2   | 3.8   | 1501.76 | 0.94 | 0.45 | 0.17 |
| 1140 | NESTEYGLFQISN  | 13 | -0.14 | 0.65 | 0.65 | -0.8  | 0.29 | -0.12 | 0.92 | -2   | 3.8   | 1501.76 | 0.99 | 0.42 | 0.06 |
| 1141 | ESTEYGLFQISNKL | 13 | -0.18 | 0.64 | 0.64 | -0.83 | 0.57 | 0.09  | 0.92 | -1   | 4.54  | 1515.83 | 0.61 | 0.48 | 0.10 |
| 1142 | STEYGLFQISNKL  | 13 | -0.09 | 0.63 | 0.63 | -0.27 | 0.48 | -0.28 | 0.85 | 0    | 6.35  | 1499.88 | 0.99 | 0.54 | 0.35 |
| 1143 | TEYGLFQISNKLW  | 13 | -0.04 | 0.63 | 0.63 | -0.28 | 0.48 | -0.56 | 0.85 | 0    | 6.35  | 1599.02 | 0.99 | 0.56 | 0.20 |
| 1144 | EYGLFQISNKLWC  | 13 | -0.02 | 0.64 | 0.64 | -0.03 | 0.48 | -0.61 | 0.77 | 0    | 6.32  | 1601.05 | 0.61 | 0.61 | 0.75 |
| 1145 | YGLFQISNKLWCK  | 13 | -0.06 | 0.64 | 0.64 | -0.06 | 0.66 | -0.61 | 0.85 | 2    | 9.25  | 1600.11 | 0.99 | 0.57 | 0.98 |
| 1146 | GLFQISNKLWCKS  | 13 | -0.08 | 0.62 | 0.62 | -0.02 | 0.66 | -0.41 | 0.85 | 2    | 9.36  | 1524.01 | 0.98 | 0.59 | 0.98 |
| 1147 | LFQISNKLWCKSS  | 13 | -0.12 | 0.61 | 0.61 | -0.05 | 0.66 | -0.38 | 0.92 | 2    | 9.36  | 1554.03 | 0.94 | 0.62 | 0.94 |
| 1148 | FQISNKLWCKSSQ  | 13 | -0.21 | 0.62 | 0.62 | -0.62 | 0.76 | -0.23 | 1.08 | 2    | 9.36  | 1569    | 0.61 | 0.58 | 0.71 |
| 1149 | QISNKLWCKSSQV  | 13 | -0.21 | 0.62 | 0.62 | -0.51 | 0.76 | -0.15 | 1.08 | 2    | 9.36  | 1520.96 | 0.99 | 0.63 | 0.10 |
| 1150 | ISNKLWCKSSQVP  | 13 | -0.17 | 0.6  | 0.6  | -0.36 | 0.66 | -0.17 | 0.92 | 2    | 9.36  | 1489.94 | 0.99 | 0.63 | 0.19 |

|      |               |    |       |      |      |       |      |       |      |      |       |         |      |      |      |
|------|---------------|----|-------|------|------|-------|------|-------|------|------|-------|---------|------|------|------|
| 1151 | SNKLWCKSSQVPO | 13 | -0.28 | 0.6  | 0.6  | -0.98 | 0.76 | -0.02 | 1.08 | 2    | 9.36  | 1504.91 | 0.99 | 0.52 | 0.18 |
| 1152 | NKLWCKSSQVPQS | 13 | -0.28 | 0.6  | 0.6  | -0.98 | 0.76 | -0.02 | 1.08 | 2    | 9.36  | 1504.91 | 0.99 | 0.51 | 0.43 |
| 1153 | KLWCKSSQVPQSR | 13 | -0.36 | 0.59 | 0.59 | -1.05 | 0.95 | 0.2   | 1.23 | 3    | 10.07 | 1546.99 | 0.99 | 0.48 | 0.80 |
| 1154 | LWCKSSQVPQSRN | 13 | -0.33 | 0.6  | 0.6  | -1.02 | 0.66 | -0.02 | 1.23 | 2    | 9.55  | 1532.92 | 0.99 | 0.42 | 0.41 |
| 1155 | WCKSSQVPQSRNI | 13 | -0.31 | 0.61 | 0.61 | -0.97 | 0.66 | -0.02 | 1.23 | 2    | 9.55  | 1532.92 | 0.97 | 0.41 | 0.19 |
| 1156 | CKSSQVPQSRNIC | 13 | -0.34 | 0.62 | 0.62 | -0.71 | 0.66 | 0.17  | 1.15 | 2    | 9.03  | 1449.84 | 0.86 | 0.40 | 0.56 |
| 1157 | KSSQVPQSRNICD | 13 | -0.4  | 0.63 | 0.63 | -1.17 | 0.66 | 0.48  | 1.23 | 1    | 8.57  | 1461.79 | 0.99 | 0.48 | 0.06 |
| 1158 | SSQVPQSRNICDI | 13 | -0.25 | 0.63 | 0.63 | -0.52 | 0.38 | 0.11  | 1.08 | 0    | 6.16  | 1446.78 | 0.99 | 0.49 | 0.06 |
| 1159 | SQVPQSRNICDIS | 13 | -0.25 | 0.63 | 0.63 | -0.52 | 0.38 | 0.11  | 1.08 | 0    | 6.16  | 1446.78 | 0.99 | 0.53 | 0.13 |
| 1160 | QVPQSRNICDISC | 13 | -0.23 | 0.64 | 0.64 | -0.27 | 0.38 | 0.01  | 1    | 0    | 6.13  | 1462.84 | 0.99 | 0.51 | 0.62 |
| 1161 | VPQSRNICDISCD | 13 | -0.23 | 0.65 | 0.65 | -0.27 | 0.28 | 0.22  | 0.92 | -1   | 4.21  | 1449.79 | 0.99 | 0.48 | 0.50 |
| 1162 | PQSRNICDISCDK | 13 | -0.36 | 0.64 | 0.64 | -0.89 | 0.57 | 0.57  | 1.08 | 0    | 6.25  | 1478.83 | 0.94 | 0.41 | 0.32 |
| 1163 | QSRNICDISCDKF | 13 | -0.31 | 0.67 | 0.67 | -0.55 | 0.57 | 0.38  | 1.08 | 0    | 6.25  | 1528.89 | 0.99 | 0.50 | 0.47 |
| 1164 | SRNICDISCDKFL | 13 | -0.21 | 0.66 | 0.66 | 0.01  | 0.47 | 0.22  | 0.92 | 0    | 6.25  | 1513.92 | 0.99 | 0.65 | 0.66 |
| 1165 | RNICDISCDKFLD | 13 | -0.25 | 0.68 | 0.68 | -0.2  | 0.47 | 0.43  | 0.92 | -1   | 4.43  | 1541.93 | 0.99 | 0.47 | 0.64 |
| 1166 | NICDISCDKFLDD | 13 | -0.17 | 0.68 | 0.68 | -0.12 | 0.28 | 0.43  | 0.69 | -3   | 3.77  | 1500.83 | 0.99 | 0.43 | 0.25 |
| 1167 | ICDISCDKFLDDD | 13 | -0.18 | 0.68 | 0.68 | -0.12 | 0.28 | 0.65  | 0.62 | -4   | 3.66  | 1501.81 | 0.99 | 0.43 | 0.21 |
| 1168 | CDISCDKFLDDDI | 13 | -0.18 | 0.68 | 0.68 | -0.12 | 0.28 | 0.65  | 0.62 | -4   | 3.66  | 1501.81 | 0.61 | 0.42 | 0.17 |
| 1169 | DISCDKFLDDDIT | 13 | -0.19 | 0.68 | 0.68 | -0.37 | 0.28 | 0.69  | 0.69 | -4   | 3.66  | 1499.78 | 0.61 | 0.44 | 0.05 |
| 1170 | ISCDKFLDDDITD | 13 | -0.19 | 0.68 | 0.68 | -0.37 | 0.28 | 0.69  | 0.69 | -4   | 3.66  | 1499.78 | 0.99 | 0.42 | 0.07 |
| 1171 | SCDKFLDDDITDD | 13 | -0.3  | 0.68 | 0.68 | -0.98 | 0.28 | 1.06  | 0.77 | -5   | 3.57  | 1501.7  | 0.99 | 0.43 | 0.08 |
| 1172 | CDKFLDDDITDDI | 13 | -0.23 | 0.69 | 0.69 | -0.58 | 0.28 | 0.9   | 0.69 | -5   | 3.57  | 1527.79 | 0.61 | 0.42 | 0.04 |
| 1173 | DKFLDDDITDDIM | 13 | -0.21 | 0.71 | 0.71 | -0.62 | 0.28 | 0.88  | 0.69 | -5   | 3.57  | 1555.85 | 0.61 | 0.39 | 0.04 |
| 1174 | KFLDDDITDDIMC | 13 | -0.15 | 0.7  | 0.7  | -0.16 | 0.28 | 0.57  | 0.62 | -4   | 3.66  | 1543.9  | 0.99 | 0.49 | 0.03 |
| 1175 | FLDDDITDDIMCA | 13 | -0.05 | 0.68 | 0.68 | 0.28  | 0    | 0.3   | 0.46 | -5   | 3.25  | 1486.8  | 0.61 | 0.48 | 0.02 |
| 1176 | LDDDITDDIMCAK | 13 | -0.18 | 0.68 | 0.68 | -0.24 | 0.28 | 0.72  | 0.62 | -4   | 3.66  | 1467.8  | 0.99 | 0.41 | 0.03 |
| 1177 | DDDITDDIMCAK  | 13 | -0.31 | 0.69 | 0.69 | -0.83 | 0.56 | 1.09  | 0.77 | -3   | 3.98  | 1482.81 | 0.61 | 0.64 | 0.07 |
| 1178 | DDITDDIMCAK   | 13 | -0.19 | 0.69 | 0.69 | -0.22 | 0.56 | 0.72  | 0.69 | -2   | 4.14  | 1480.89 | 0.86 | 0.68 | 0.10 |
| 1179 | DITDDIMCAK    | 13 | -0.1  | 0.67 | 0.67 | 0.35  | 0.56 | 0.35  | 0.62 | -1   | 4.43  | 1478.97 | 0.86 | 0.73 | 0.35 |
| 1180 | ITDDIMCAK     | 13 | -0.1  | 0.67 | 0.67 | 0.35  | 0.56 | 0.35  | 0.62 | -1   | 4.43  | 1478.97 | 0.99 | 0.63 | 0.20 |
| 1181 | TDDIMCAK      | 13 | -0.1  | 0.67 | 0.67 | 0.35  | 0.56 | 0.35  | 0.62 | -1   | 4.43  | 1478.97 | 0.99 | 0.63 | 0.20 |
| 1182 | DDIMCAK       | 13 | -0.17 | 0.68 | 0.68 | 0.1   | 0.85 | 0.62  | 0.69 | 0    | 6.35  | 1506.04 | 0.61 | 0.63 | 0.71 |
| 1183 | DIMCAK        | 13 | -0.1  | 0.68 | 0.68 | 0.34  | 0.85 | 0.38  | 0.62 | 1    | 8.51  | 1448.01 | 0.61 | 0.51 | 0.93 |
| 1184 | IMCAK         | 13 | 0.01  | 0.67 | 0.67 | 0.95  | 0.85 | 0.02  | 0.54 | 2    | 9.25  | 1446.09 | 0.99 | 0.46 | 0.95 |
| 1185 | MCAK          | 13 | -0.1  | 0.68 | 0.68 | 0.34  | 0.85 | 0.38  | 0.62 | 1    | 8.51  | 1448.01 | 0.99 | 0.44 | 0.94 |
| 1186 | CAK           | 13 | -0.12 | 0.67 | 0.67 | 0.09  | 0.85 | 0.31  | 0.69 | 1    | 8.48  | 1479.99 | 0.54 | 0.46 | 0.95 |
| 1187 | AKKID         | 13 | -0.09 | 0.66 | 0.66 | -0.17 | 0.85 | 0.12  | 0.77 | 1    | 8.76  | 1563.07 | 0.61 | 0.54 | 0.92 |
| 1188 | KKID          | 13 | -0.07 | 0.66 | 0.66 | -0.02 | 0.85 | 0.02  | 0.77 | 1    | 8.76  | 1605.16 | 0.99 | 0.48 | 0.67 |
| 1189 | KID           | 13 | 0.03  | 0.65 | 0.65 | 0.42  | 0.56 | -0.25 | 0.62 | 0    | 6.3   | 1548.06 | 0.99 | 0.48 | 0.65 |
| 1190 | ILD           | 13 | 0.09  | 0.6  | 0.6  | 0.48  | 0.39 | -0.52 | 0.54 | -0.5 | 5.22  | 1557.03 | 0.99 | 0.48 | 0.27 |
| 1191 | LD            | 13 | -0.06 | 0.6  | 0.6  | -0.17 | 0.68 | -0.15 | 0.69 | 0.5  | 7.09  | 1572.04 | 0.99 | 0.46 | 0.35 |
| 1192 | DIK           | 13 | -0.08 | 0.59 | 0.59 | -0.32 | 0.68 | -0.05 | 0.69 | 0.5  | 7.09  | 1529.95 | 0.86 | 0.59 | 0.67 |
| 1193 | IKG           | 13 | 0.02  | 0.58 | 0.58 | 0.24  | 0.68 | -0.42 | 0.62 | 1.5  | 8.84  | 1528.03 | 0.99 | 0.60 | 0.90 |
| 1194 | KG            | 13 | -0.03 | 0.57 | 0.57 | 0.08  | 0.68 | -0.35 | 0.62 | 1.5  | 8.51  | 1518    | 0.98 | 0.63 | 0.94 |
| 1195 | GID           | 13 | 0.04  | 0.56 | 0.56 | 0.33  | 0.39 | -0.62 | 0.54 | 0.5  | 7.06  | 1490.93 | 0.98 | 0.68 | 0.91 |
| 1196 | ID            | 13 | -0.02 | 0.56 | 0.56 | 0.09  | 0.49 | -0.38 | 0.62 | -0.5 | 5.33  | 1562.99 | 0.97 | 0.67 | 0.89 |
| 1197 | DY            | 13 | -0.16 | 0.56 | 0.56 | -0.55 | 0.77 | -0.02 | 0.77 | 0.5  | 7.06  | 1578    | 0.61 | 0.66 | 0.93 |
| 1198 | Y             | 13 | -0.07 | 0.54 | 0.54 | 0.01  | 0.77 | -0.38 | 0.69 | 1.5  | 8.51  | 1576.08 | 0.99 | 0.62 | 0.98 |
| 1199 | W             | 13 | -0.12 | 0.54 | 0.54 | -0.16 | 0.87 | 0.02  | 0.69 | 0.5  | 7.07  | 1542.02 | 0.99 | 0.57 | 0.85 |
| 1200 | LA            | 13 | -0.2  | 0.55 | 0.55 | -0.36 | 0.97 | 0.3   | 0.77 | 0.5  | 7.07  | 1483.94 | 0.99 | 0.57 | 0.38 |
| 1201 | AH            | 13 | -0.21 | 0.55 | 0.55 | -0.72 | 0.97 | 0.18  | 0.85 | 0.5  | 7.07  | 1556.99 | 0.86 | 0.44 | 0.60 |
| 1202 | HK            | 13 | -0.19 | 0.55 | 0.55 | -0.57 | 0.97 | 0.08  | 0.85 | 0.5  | 7.07  | 1599.08 | 0.99 | 0.33 | 0.82 |
| 1203 | KAL           | 13 | -0.16 | 0.6  | 0.6  | -0.13 | 0.86 | 0.04  | 0.77 | 0    | 6.43  | 1565.07 | 0.99 | 0.35 | 0.76 |
| 1204 | AL            | 13 | -0.12 | 0.6  | 0.6  | -0.1  | 0.67 | 0.04  | 0.69 | -2   | 4.26  | 1566.01 | 0.61 | 0.23 | 0.57 |
| 1205 | L             | 13 | -0.22 | 0.61 | 0.61 | -0.54 | 0.95 | 0.31  | 0.85 | -1   | 4.79  | 1623.11 | 0.99 | 0.18 | 0.29 |
| 1206 | C             | 13 | -0.22 | 0.61 | 0.61 | -0.54 | 0.95 | 0.31  | 0.85 | -1   | 4.79  | 1623.11 | 0.61 | 0.20 | 0.57 |
| 1207 | MR            | 14 | 0.32  | 0.64 | 0.64 | 2.21  | 0.18 | -1.32 | 0.29 | 1    | 10.11 | 1699.39 | 0.93 | 0.65 | 0.98 |
| 1208 | R             | 14 | 0.29  | 0.61 | 0.61 | 1.96  | 0.18 | -1.23 | 0.29 | 1    | 10.11 | 1665.31 | 0.93 | 0.67 | 0.96 |
| 1209 | F             | 14 | 0.44  | 0.6  | 0.6  | 2.41  | 0    | -1.48 | 0    | 0    | 5.88  | 1580.2  | 0.94 | 0.70 | 0.98 |
| 1210 | F             | 14 | 0.45  | 0.6  | 0.6  | 2.53  | 0    | -1.43 | 0    | 0    | 5.88  | 1546.19 | 0.94 | 0.65 | 0.95 |
| 1211 | V             | 14 | 0.44  | 0.59 | 0.59 | 2.6   | 0    | -1.38 | 0    | 0    | 5.88  | 1512.18 | 0.93 | 0.59 | 0.74 |
| 1212 | P             | 14 | 0.42  | 0.58 | 0.58 | 2.43  | 0    | -1.31 | 0    | 0    | 5.88  | 1484.12 | 0.98 | 0.60 | 0.82 |
| 1213 | L             | 14 | 0.35  | 0.6  | 0.6  | 2.26  | 0.26 | -1.09 | 0.14 | 1    | 9.11  | 1515.18 | 0.98 | 0.67 | 0.95 |
| 1214 | F             | 14 | 0.26  | 0.61 | 0.61 | 1.74  | 0.35 | -0.95 | 0.29 | 1    | 9.11  | 1530.15 | 0.80 | 0.61 | 0.99 |

|      |                 |    |       |      |      |       |      |       |      |      |       |         |      |      |      |
|------|-----------------|----|-------|------|------|-------|------|-------|------|------|-------|---------|------|------|------|
| 1215 | LVGILFPAILAKQF  | 14 | 0.26  | 0.61 | 0.61 | 1.74  | 0.35 | -0.95 | 0.29 | 1    | 9.11  | 1530.15 | 0.98 | 0.53 | 0.98 |
| 1216 | VGILFPAILAKQFT  | 14 | 0.21  | 0.61 | 0.61 | 1.42  | 0.35 | -0.85 | 0.36 | 1    | 9.11  | 1518.09 | 0.98 | 0.56 | 0.98 |
| 1217 | GILFPAILAKQFTK  | 14 | 0.09  | 0.61 | 0.61 | 0.84  | 0.61 | -0.53 | 0.5  | 2    | 10.02 | 1547.13 | 0.95 | 0.62 | 0.98 |
| 1218 | ILFPAILAKQFTKC  | 14 | 0.08  | 0.6  | 0.6  | 1.05  | 0.61 | -0.6  | 0.5  | 2    | 9.36  | 1593.21 | 0.93 | 0.67 | 0.98 |
| 1219 | LFPAILAKQFTKCE  | 14 | -0.02 | 0.6  | 0.6  | 0.48  | 0.7  | -0.26 | 0.57 | 1    | 8.54  | 1609.16 | 0.93 | 0.64 | 0.97 |
| 1220 | FPAILAKQFTKCEL  | 14 | -0.02 | 0.6  | 0.6  | 0.48  | 0.7  | -0.26 | 0.57 | 1    | 8.54  | 1609.16 | 0.94 | 0.59 | 0.94 |
| 1221 | PAILAKQFTKCELS  | 14 | -0.08 | 0.59 | 0.59 | 0.22  | 0.7  | -0.06 | 0.64 | 1    | 8.54  | 1549.06 | 0.98 | 0.58 | 0.78 |
| 1222 | AILAKQFTKCELSQ  | 14 | -0.12 | 0.61 | 0.61 | 0.09  | 0.79 | -0.04 | 0.79 | 1    | 8.54  | 1580.08 | 0.80 | 0.53 | 0.61 |
| 1223 | ILAKQFTKCELSQL  | 14 | -0.1  | 0.61 | 0.61 | 0.23  | 0.79 | -0.14 | 0.79 | 1    | 8.54  | 1622.17 | 0.99 | 0.51 | 0.36 |
| 1224 | LAKQFTKCELSQLL  | 14 | -0.12 | 0.6  | 0.6  | 0.18  | 0.79 | -0.14 | 0.79 | 1    | 8.54  | 1622.17 | 0.99 | 0.48 | 0.85 |
| 1225 | AKQFTKCELSQLLK  | 14 | -0.23 | 0.61 | 0.61 | -0.37 | 1.06 | 0.21  | 0.93 | 2    | 9.25  | 1637.18 | 0.61 | 0.44 | 0.84 |
| 1226 | KQFTKCELSQLLKD  | 14 | -0.3  | 0.63 | 0.63 | -0.75 | 1.06 | 0.46  | 1    | 1    | 8.51  | 1681.19 | 0.99 | 0.37 | 0.67 |
| 1227 | QFTKCELSQLLKDI  | 14 | -0.17 | 0.63 | 0.63 | -0.15 | 0.79 | 0.11  | 0.86 | 0    | 6.38  | 1666.18 | 0.94 | 0.35 | 0.19 |
| 1228 | FTKCELSQLLKDID  | 14 | -0.17 | 0.64 | 0.64 | -0.15 | 0.7  | 0.31  | 0.79 | -1   | 4.56  | 1653.13 | 0.61 | 0.31 | 0.27 |
| 1229 | TKCELSQLLKIDIG  | 14 | -0.21 | 0.64 | 0.64 | -0.38 | 0.7  | 0.49  | 0.79 | -1   | 4.56  | 1563.01 | 0.99 | 0.37 | 0.05 |
| 1230 | KCELSQLLKIDIDYG | 14 | -0.19 | 0.65 | 0.65 | -0.42 | 0.7  | 0.36  | 0.79 | -1   | 4.56  | 1625.08 | 0.99 | 0.29 | 0.04 |
| 1231 | CELSQLLKIDIDYGY | 14 | -0.1  | 0.65 | 0.65 | -0.17 | 0.44 | 0.14  | 0.64 | -2   | 4.03  | 1553.96 | 0.61 | 0.30 | 0.04 |
| 1232 | ELSQLLKIDIDYGG  | 14 | -0.09 | 0.65 | 0.65 | -0.38 | 0.44 | 0.21  | 0.64 | -2   | 4.03  | 1507.88 | 0.61 | 0.31 | 0.03 |
| 1233 | LSQLLKIDIDYGGI  | 14 | 0     | 0.65 | 0.65 | 0.19  | 0.35 | -0.13 | 0.57 | -1   | 4.21  | 1491.93 | 0.99 | 0.31 | 0.11 |
| 1234 | SQLLKIDIDYGGIA  | 14 | -0.02 | 0.65 | 0.65 | 0.05  | 0.35 | -0.04 | 0.57 | -1   | 4.21  | 1449.84 | 0.99 | 0.32 | 0.11 |
| 1235 | QLLKIDIDYGGIAL  | 14 | 0.04  | 0.65 | 0.65 | 0.38  | 0.35 | -0.19 | 0.5  | -1   | 4.21  | 1475.93 | 0.94 | 0.42 | 0.09 |
| 1236 | LLKIDIDYGGIALP  | 14 | 0.09  | 0.63 | 0.63 | 0.51  | 0.26 | -0.2  | 0.36 | -1   | 4.21  | 1444.91 | 0.99 | 0.55 | 0.61 |
| 1237 | LKIDIDYGGIALPE  | 14 | 0     | 0.64 | 0.64 | -0.01 | 0.35 | 0.14  | 0.43 | -2   | 4.03  | 1460.86 | 0.99 | 0.53 | 0.07 |
| 1238 | KIDIDYGGIALPEL  | 14 | 0     | 0.64 | 0.64 | -0.01 | 0.35 | 0.14  | 0.43 | -2   | 4.03  | 1460.86 | 0.99 | 0.55 | 0.06 |
| 1239 | DIDYGGIALPELI   | 14 | 0.13  | 0.64 | 0.64 | 0.59  | 0.09 | -0.2  | 0.29 | -3   | 3.5   | 1445.85 | 0.61 | 0.58 | 0.10 |
| 1240 | IDYGGIALPELIC   | 14 | 0.19  | 0.63 | 0.63 | 1.02  | 0.09 | -0.49 | 0.21 | -2   | 3.67  | 1433.9  | 0.97 | 0.59 | 0.47 |
| 1241 | DYGGIALPELIC    | 14 | 0.12  | 0.62 | 0.62 | 0.65  | 0.09 | -0.39 | 0.29 | -2   | 3.67  | 1421.84 | 0.86 | 0.59 | 0.16 |
| 1242 | GYGGIALPELIC    | 14 | 0.19  | 0.62 | 0.62 | 1.04  | 0.09 | -0.69 | 0.21 | -1   | 4     | 1437.95 | 0.98 | 0.58 | 0.67 |
| 1243 | YGGIALPELIC     | 14 | 0.23  | 0.62 | 0.62 | 1.26  | 0.09 | -0.87 | 0.21 | -1   | 4     | 1528.07 | 0.99 | 0.59 | 0.19 |
| 1244 | GGIALPELIC      | 14 | 0.2   | 0.57 | 0.57 | 1.13  | 0.19 | -0.74 | 0.21 | -0.5 | 5.25  | 1502.04 | 0.93 | 0.63 | 0.65 |
| 1245 | GIALPELIC       | 14 | 0.17  | 0.56 | 0.56 | 1.11  | 0.19 | -0.77 | 0.29 | -0.5 | 5.25  | 1546.09 | 0.98 | 0.64 | 0.27 |
| 1246 | IALPELIC        | 14 | 0.14  | 0.55 | 0.55 | 1.08  | 0.19 | -0.75 | 0.36 | -0.5 | 5.25  | 1576.11 | 0.97 | 0.54 | 0.25 |
| 1247 | ALPELIC         | 14 | 0.1   | 0.55 | 0.55 | 0.73  | 0.19 | -0.62 | 0.36 | -0.5 | 5.25  | 1520    | 0.61 | 0.42 | 0.16 |
| 1248 | LPELIC          | 14 | 0.08  | 0.56 | 0.56 | 0.51  | 0.19 | -0.75 | 0.43 | -0.5 | 5.25  | 1612.1  | 0.98 | 0.37 | 0.07 |
| 1249 | PELIC           | 14 | -0.01 | 0.58 | 0.58 | -0.01 | 0.19 | -0.41 | 0.5  | -1.5 | 4.36  | 1614.02 | 0.87 | 0.32 | 0.05 |
| 1250 | ELICTMFHTSGYDT  | 14 | -0.01 | 0.59 | 0.59 | 0.05  | 0.19 | -0.44 | 0.57 | -1.5 | 4.36  | 1618.01 | 0.80 | 0.32 | 0.04 |
| 1251 | LICTMFHTSGYDTQ  | 14 | -0.02 | 0.59 | 0.59 | 0.05  | 0.19 | -0.64 | 0.64 | -0.5 | 5.09  | 1617.03 | 0.93 | 0.37 | 0.17 |
| 1252 | ICTMFHTSGYDTQA  | 14 | -0.04 | 0.59 | 0.59 | -0.09 | 0.19 | -0.54 | 0.64 | -0.5 | 5.09  | 1574.94 | 0.93 | 0.38 | 0.38 |
| 1253 | CTMFHTSGYDTQAI  | 14 | -0.04 | 0.59 | 0.59 | -0.09 | 0.19 | -0.54 | 0.64 | -0.5 | 5.09  | 1574.94 | 0.94 | 0.31 | 0.13 |
| 1254 | TMFHTSGYDTQAI   | 14 | 0     | 0.6  | 0.6  | 0.03  | 0.19 | -0.58 | 0.64 | -0.5 | 5.09  | 1570.94 | 0.98 | 0.37 | 0.11 |
| 1255 | MFHTSGYDTQAI    | 14 | -0.03 | 0.61 | 0.61 | -0.17 | 0.28 | -0.34 | 0.64 | -1.5 | 4.36  | 1598.95 | 0.98 | 0.37 | 0.09 |
| 1256 | FHTSGYDTQAI     | 14 | -0.1  | 0.6  | 0.6  | -0.56 | 0.28 | -0.23 | 0.79 | -1.5 | 4.36  | 1581.86 | 0.94 | 0.39 | 0.06 |
| 1257 | HTSGYDTQAI      | 14 | -0.19 | 0.61 | 0.61 | -1.01 | 0.28 | -0.04 | 0.93 | -1.5 | 4.36  | 1548.79 | 0.93 | 0.36 | 0.04 |
| 1258 | TSGYDTQAI       | 14 | -0.2  | 0.66 | 0.66 | -1.03 | 0.27 | 0.21  | 0.93 | -3   | 3.58  | 1540.76 | 0.93 | 0.29 | 0.03 |
| 1259 | SGYDTQAI        | 14 | -0.21 | 0.66 | 0.66 | -1.04 | 0.27 | 0.26  | 0.93 | -3   | 3.58  | 1526.73 | 0.93 | 0.31 | 0.04 |
| 1260 | GYDTQAI         | 14 | -0.2  | 0.66 | 0.66 | -1.03 | 0.27 | 0.21  | 0.93 | -3   | 3.58  | 1540.76 | 0.83 | 0.33 | 0.03 |
| 1261 | YDTQAI          | 14 | -0.26 | 0.66 | 0.66 | -1.25 | 0.36 | 0.43  | 1    | -4   | 3.51  | 1612.82 | 0.98 | 0.37 | 0.05 |
| 1262 | DTQAI           | 14 | -0.26 | 0.66 | 0.66 | -1.25 | 0.36 | 0.43  | 1    | -4   | 3.51  | 1612.82 | 0.94 | 0.39 | 0.06 |
| 1263 | TQAI            | 14 | -0.2  | 0.65 | 0.65 | -1.03 | 0.36 | 0.21  | 0.93 | -3   | 3.68  | 1554.79 | 0.98 | 0.42 | 0.04 |
| 1264 | QAI             | 14 | -0.15 | 0.65 | 0.65 | -0.71 | 0.36 | 0.11  | 0.86 | -3   | 3.68  | 1566.85 | 0.99 | 0.38 | 0.07 |
| 1265 | AIVEN           | 14 | -0.05 | 0.65 | 0.65 | -0.26 | 0.27 | -0.08 | 0.71 | -3   | 3.68  | 1585.89 | 0.61 | 0.45 | 0.08 |
| 1266 | IVEN            | 14 | -0.12 | 0.66 | 0.66 | -0.64 | 0.36 | -0.03 | 0.86 | -3   | 3.68  | 1642.95 | 0.94 | 0.45 | 0.09 |
| 1267 | VEN             | 14 | -0.12 | 0.66 | 0.66 | -0.64 | 0.36 | -0.03 | 0.86 | -3   | 3.68  | 1642.95 | 0.99 | 0.45 | 0.09 |
| 1268 | EN              | 14 | -0.18 | 0.65 | 0.65 | -0.99 | 0.36 | 0.1   | 0.93 | -3   | 3.68  | 1630.89 | 0.61 | 0.45 | 0.12 |
| 1269 | NN              | 14 | -0.18 | 0.66 | 0.66 | -0.99 | 0.27 | -0.1  | 1    | -2   | 3.8   | 1615.88 | 0.94 | 0.41 | 0.05 |
| 1270 | NE              | 14 | -0.21 | 0.65 | 0.65 | -1.02 | 0.53 | 0.1   | 1    | -1   | 4.54  | 1629.95 | 0.99 | 0.42 | 0.07 |
| 1271 | ESTE            | 14 | -0.13 | 0.64 | 0.64 | -0.5  | 0.53 | -0.04 | 0.86 | -1   | 4.54  | 1629.01 | 0.61 | 0.54 | 0.14 |
| 1272 | STEY            | 14 | -0.06 | 0.62 | 0.62 | -0.31 | 0.44 | -0.5  | 0.86 | 0    | 6.35  | 1686.11 | 0.99 | 0.52 | 0.26 |
| 1273 | TEY             | 14 | -0.04 | 0.63 | 0.63 | -0.08 | 0.44 | -0.59 | 0.79 | 0    | 6.32  | 1702.17 | 0.97 | 0.56 | 0.29 |
| 1274 | EY              | 14 | -0.1  | 0.64 | 0.64 | -0.31 | 0.7  | -0.35 | 0.86 | 1    | 8.51  | 1729.24 | 0.61 | 0.53 | 0.87 |
| 1275 | YGLF            | 14 | -0.08 | 0.63 | 0.63 | -0.11 | 0.61 | -0.54 | 0.86 | 2    | 9.25  | 1687.2  | 0.99 | 0.57 | 0.98 |
| 1276 | GLF             | 14 | -0.1  | 0.62 | 0.62 | -0.08 | 0.61 | -0.36 | 0.86 | 2    | 9.36  | 1611.1  | 0.98 | 0.61 | 0.99 |
| 1277 | LF              | 14 | -0.16 | 0.62 | 0.62 | -0.3  | 0.7  | -0.34 | 1    | 2    | 9.36  | 1682.18 | 0.94 | 0.62 | 0.87 |
| 1278 | F               | 14 | -0.16 | 0.63 | 0.63 | -0.27 | 0.7  | -0.32 | 1    | 2    | 9.36  | 1668.15 | 0.61 | 0.58 | 0.27 |

|      |                 |    |       |      |      |       |      |       |      |      |       |         |      |      |      |
|------|-----------------|----|-------|------|------|-------|------|-------|------|------|-------|---------|------|------|------|
| 1279 | QISNLWCKSSQVP   | 14 | -0.2  | 0.61 | 0.61 | -0.59 | 0.7  | -0.14 | 1    | 2    | 9.36  | 1618.09 | 0.99 | 0.61 | 0.12 |
| 1280 | ISNLWCKSSQVPQ   | 14 | -0.2  | 0.61 | 0.61 | -0.59 | 0.7  | -0.14 | 1    | 2    | 9.36  | 1618.09 | 0.99 | 0.57 | 0.12 |
| 1281 | SNKLWCKSSQVPQS  | 14 | -0.27 | 0.59 | 0.59 | -0.96 | 0.7  | 0.01  | 1.07 | 2    | 9.36  | 1592    | 0.99 | 0.50 | 0.08 |
| 1282 | NKLWCKSSQVPQSR  | 14 | -0.38 | 0.6  | 0.6  | -1.23 | 0.88 | 0.2   | 1.29 | 3    | 10.07 | 1661.11 | 0.99 | 0.46 | 0.58 |
| 1283 | KLWCKSSQVPQSRN  | 14 | -0.38 | 0.6  | 0.6  | -1.23 | 0.88 | 0.2   | 1.29 | 3    | 10.07 | 1661.11 | 0.99 | 0.47 | 0.68 |
| 1284 | LWCKSSQVPQSRNI  | 14 | -0.25 | 0.61 | 0.61 | -0.63 | 0.62 | -0.14 | 1.14 | 2    | 9.55  | 1646.1  | 0.99 | 0.40 | 0.28 |
| 1285 | WCKSSQVPQSRNIC  | 14 | -0.29 | 0.61 | 0.61 | -0.72 | 0.62 | -0.09 | 1.14 | 2    | 9.03  | 1636.07 | 0.97 | 0.41 | 0.73 |
| 1286 | CKSSQVPQSRNICD  | 14 | -0.36 | 0.63 | 0.63 | -0.91 | 0.62 | 0.37  | 1.14 | 1    | 8.38  | 1564.94 | 0.86 | 0.42 | 0.09 |
| 1287 | KSSQVPQSRNICDI  | 14 | -0.31 | 0.64 | 0.64 | -0.76 | 0.62 | 0.31  | 1.14 | 1    | 8.57  | 1574.97 | 0.99 | 0.48 | 0.06 |
| 1288 | SSQVPQSRNICDIS  | 14 | -0.26 | 0.63 | 0.63 | -0.54 | 0.35 | 0.12  | 1.07 | 0    | 6.16  | 1533.87 | 0.99 | 0.51 | 0.06 |
| 1289 | SQVPQSRNICDISC  | 14 | -0.23 | 0.63 | 0.63 | -0.31 | 0.35 | 0.03  | 1    | 0    | 6.13  | 1549.93 | 0.99 | 0.51 | 0.81 |
| 1290 | QVPQSRNICDISCD  | 14 | -0.27 | 0.65 | 0.65 | -0.5  | 0.35 | 0.22  | 1    | -1   | 4.21  | 1577.94 | 0.99 | 0.50 | 0.24 |
| 1291 | VPQSRNICDISCDK  | 14 | -0.3  | 0.65 | 0.65 | -0.53 | 0.53 | 0.42  | 1    | 0    | 6.25  | 1577.98 | 0.99 | 0.45 | 0.22 |
| 1292 | PQSRNICDISCDKF  | 14 | -0.29 | 0.65 | 0.65 | -0.63 | 0.53 | 0.35  | 1    | 0    | 6.25  | 1626.02 | 0.94 | 0.43 | 0.47 |
| 1293 | QSRNICDISCDKFL  | 14 | -0.25 | 0.66 | 0.66 | -0.24 | 0.53 | 0.22  | 1    | 0    | 6.25  | 1642.07 | 0.99 | 0.60 | 0.56 |
| 1294 | SRNICDISCDKFLD  | 14 | -0.25 | 0.67 | 0.67 | -0.24 | 0.44 | 0.42  | 0.93 | -1   | 4.43  | 1629.02 | 0.99 | 0.44 | 0.48 |
| 1295 | RNICDISCDKFLDD  | 14 | -0.28 | 0.68 | 0.68 | -0.44 | 0.44 | 0.61  | 0.93 | -2   | 4.14  | 1657.03 | 0.99 | 0.41 | 0.32 |
| 1296 | NICDISCDKFLDDD  | 14 | -0.21 | 0.69 | 0.69 | -0.36 | 0.26 | 0.61  | 0.71 | -4   | 3.66  | 1615.93 | 0.99 | 0.39 | 0.14 |
| 1297 | ICDISCDKFLDDDD  | 14 | -0.11 | 0.68 | 0.68 | 0.21  | 0.26 | 0.47  | 0.57 | -4   | 3.66  | 1614.99 | 0.99 | 0.39 | 0.30 |
| 1298 | CDISCDKFLDDDDIT | 14 | -0.18 | 0.67 | 0.67 | -0.16 | 0.26 | 0.57  | 0.64 | -4   | 3.66  | 1602.93 | 0.80 | 0.40 | 0.06 |
| 1299 | DISCDKFLDDDDITD | 14 | -0.23 | 0.68 | 0.68 | -0.59 | 0.26 | 0.86  | 0.71 | -5   | 3.57  | 1614.88 | 0.61 | 0.38 | 0.03 |
| 1300 | ISCDKFLDDDDITDD | 14 | -0.23 | 0.68 | 0.68 | -0.59 | 0.26 | 0.86  | 0.71 | -5   | 3.57  | 1614.88 | 0.99 | 0.38 | 0.03 |
| 1301 | SCDKFLDDDDITDDI | 14 | -0.23 | 0.68 | 0.68 | -0.59 | 0.26 | 0.86  | 0.71 | -5   | 3.57  | 1614.88 | 0.99 | 0.39 | 0.06 |
| 1302 | CDKFLDDDDITDDIM | 14 | -0.19 | 0.7  | 0.7  | -0.4  | 0.26 | 0.74  | 0.64 | -5   | 3.57  | 1659    | 0.61 | 0.36 | 0.03 |
| 1303 | DKFLDDDDITDDIMC | 14 | -0.19 | 0.7  | 0.7  | -0.4  | 0.26 | 0.74  | 0.64 | -5   | 3.57  | 1659    | 0.61 | 0.35 | 0.04 |
| 1304 | KFLDDDDITDDIMCA | 14 | -0.12 | 0.68 | 0.68 | -0.02 | 0.26 | 0.49  | 0.57 | -4   | 3.66  | 1614.99 | 0.99 | 0.46 | 0.03 |
| 1305 | FLDDDDITDDIMCAK | 14 | -0.12 | 0.68 | 0.68 | -0.02 | 0.26 | 0.49  | 0.57 | -4   | 3.66  | 1614.99 | 0.61 | 0.46 | 0.06 |
| 1306 | LDDDDITDDIMCAK  | 14 | -0.25 | 0.68 | 0.68 | -0.5  | 0.52 | 0.89  | 0.71 | -3   | 3.98  | 1595.99 | 0.99 | 0.49 | 0.06 |
| 1307 | DDDDITDDIMCAK   | 14 | -0.23 | 0.69 | 0.69 | -0.45 | 0.52 | 0.89  | 0.71 | -3   | 3.98  | 1595.99 | 0.61 | 0.64 | 0.07 |
| 1308 | DDITDDIMCAKIL   | 14 | -0.14 | 0.68 | 0.68 | 0.07  | 0.52 | 0.54  | 0.64 | -2   | 4.14  | 1594.07 | 0.86 | 0.69 | 0.12 |
| 1309 | DITDDIMCAKILD   | 14 | -0.14 | 0.68 | 0.68 | 0.07  | 0.52 | 0.54  | 0.64 | -2   | 4.14  | 1594.07 | 0.86 | 0.57 | 0.08 |
| 1310 | ITDDIMCAKILD    | 14 | -0.04 | 0.67 | 0.67 | 0.64  | 0.52 | 0.2   | 0.57 | -1   | 4.43  | 1592.15 | 0.99 | 0.57 | 0.34 |
| 1311 | TDDIMCAKILDIK   | 14 | -0.17 | 0.67 | 0.67 | 0.04  | 0.79 | 0.54  | 0.71 | 0    | 6.35  | 1607.16 | 0.99 | 0.59 | 0.40 |
| 1312 | DDIMCAKILDIK    | 14 | -0.15 | 0.68 | 0.68 | 0.06  | 0.79 | 0.57  | 0.64 | 0    | 6.35  | 1563.11 | 0.61 | 0.49 | 0.88 |
| 1313 | DIMCAKILDIKIG   | 14 | -0.04 | 0.68 | 0.68 | 0.64  | 0.79 | 0.23  | 0.57 | 1    | 8.51  | 1561.19 | 0.61 | 0.46 | 0.80 |
| 1314 | IMCAKILDIKIGID  | 14 | -0.04 | 0.68 | 0.68 | 0.64  | 0.79 | 0.23  | 0.57 | 1    | 8.51  | 1561.19 | 0.99 | 0.43 | 0.96 |
| 1315 | MCAKILDIKIGIDY  | 14 | -0.09 | 0.68 | 0.68 | 0.22  | 0.79 | 0.19  | 0.64 | 1    | 8.48  | 1611.2  | 0.99 | 0.45 | 0.93 |
| 1316 | CAKILDIKIGIDYW  | 14 | -0.08 | 0.66 | 0.66 | 0.02  | 0.79 | 0.04  | 0.71 | 1    | 8.48  | 1666.22 | 0.54 | 0.53 | 0.98 |
| 1317 | AKKILDIKIGIDYWL | 14 | -0.05 | 0.65 | 0.65 | 0.11  | 0.79 | -0.01 | 0.71 | 1    | 8.76  | 1676.25 | 0.61 | 0.51 | 0.96 |
| 1318 | KKILDIKIGIDYWLA | 14 | -0.05 | 0.65 | 0.65 | 0.11  | 0.79 | -0.01 | 0.71 | 1    | 8.76  | 1676.25 | 0.99 | 0.48 | 0.88 |
| 1319 | KILDIKIGIDYWLAH | 14 | 0     | 0.6  | 0.6  | 0.16  | 0.63 | -0.26 | 0.64 | 0.5  | 7.09  | 1685.22 | 0.99 | 0.45 | 0.41 |
| 1320 | ILDIKIGIDYWLAHK | 14 | 0     | 0.6  | 0.6  | 0.16  | 0.63 | -0.26 | 0.64 | 0.5  | 7.09  | 1685.22 | 0.99 | 0.46 | 0.45 |
| 1321 | LDIKIGIDYWLAHKA | 14 | -0.03 | 0.59 | 0.59 | -0.03 | 0.63 | -0.17 | 0.64 | 0.5  | 7.09  | 1643.13 | 0.99 | 0.49 | 0.64 |
| 1322 | DIKIGIDYWLAHKAL | 14 | -0.03 | 0.59 | 0.59 | -0.03 | 0.63 | -0.17 | 0.64 | 0.5  | 7.09  | 1643.13 | 0.86 | 0.53 | 0.81 |
| 1323 | IKGIDYWLAHKALC  | 14 | 0.02  | 0.58 | 0.58 | 0.4   | 0.63 | -0.46 | 0.57 | 1.5  | 8.51  | 1631.18 | 0.97 | 0.53 | 0.94 |
| 1324 | KGIDYWLAHKALCT  | 14 | -0.04 | 0.57 | 0.57 | 0.03  | 0.63 | -0.36 | 0.64 | 1.5  | 8.51  | 1619.12 | 0.99 | 0.58 | 0.84 |
| 1325 | GIDYWLAHKALCTE  | 14 | -0.01 | 0.57 | 0.57 | 0.06  | 0.46 | -0.36 | 0.57 | -0.5 | 5.33  | 1620.06 | 0.98 | 0.57 | 0.73 |
| 1326 | IDYWLAHKALCTEK  | 14 | -0.1  | 0.57 | 0.57 | -0.19 | 0.72 | -0.14 | 0.71 | 0.5  | 7.06  | 1691.18 | 0.99 | 0.56 | 0.86 |
| 1327 | DYWLAHKALCTEKL  | 14 | -0.11 | 0.56 | 0.56 | -0.24 | 0.72 | -0.14 | 0.71 | 0.5  | 7.06  | 1691.18 | 0.61 | 0.54 | 0.97 |
| 1328 | YWLAHKALCTEKLE  | 14 | -0.11 | 0.55 | 0.55 | -0.24 | 0.81 | -0.14 | 0.71 | 0.5  | 7.06  | 1705.21 | 0.99 | 0.54 | 0.87 |
| 1329 | WLAHKALCTEKLEQ  | 14 | -0.16 | 0.55 | 0.55 | -0.4  | 0.9  | 0.04  | 0.79 | 0.5  | 7.07  | 1670.17 | 0.99 | 0.43 | 0.60 |
| 1330 | LAHKALCTEKLEQW  | 14 | -0.16 | 0.55 | 0.55 | -0.4  | 0.9  | 0.04  | 0.79 | 0.5  | 7.07  | 1670.17 | 0.99 | 0.47 | 0.75 |
| 1331 | AHKALCTEKLEQWL  | 14 | -0.16 | 0.55 | 0.55 | -0.4  | 0.9  | 0.04  | 0.79 | 0.5  | 7.07  | 1670.17 | 0.86 | 0.33 | 0.84 |
| 1332 | HKALCTEKLEQWLC  | 14 | -0.17 | 0.56 | 0.56 | -0.35 | 0.9  | 0     | 0.79 | 0.5  | 7.04  | 1702.23 | 0.99 | 0.27 | 0.86 |
| 1333 | KALCTEKLEQWLCE  | 14 | -0.19 | 0.6  | 0.6  | -0.37 | 0.89 | 0.25  | 0.79 | -1   | 4.79  | 1694.2  | 0.99 | 0.27 | 0.48 |
| 1334 | ALCTEKLEQWLCEK  | 14 | -0.19 | 0.6  | 0.6  | -0.37 | 0.89 | 0.25  | 0.79 | -1   | 4.79  | 1694.2  | 0.61 | 0.19 | 0.37 |
| 1335 | LCTEKLEQWLCEKL  | 14 | -0.17 | 0.6  | 0.6  | -0.23 | 0.89 | 0.16  | 0.79 | -1   | 4.79  | 1736.29 | 0.99 | 0.16 | 0.62 |
| 1336 | MRFFVPLFLVGILFP | 15 | 0.29  | 0.62 | 0.62 | 1.95  | 0.16 | -1.23 | 0.27 | 1    | 10.11 | 1796.52 | 0.93 | 0.64 | 0.98 |
| 1337 | RFFVPLFLVGILFPA | 15 | 0.29  | 0.61 | 0.61 | 1.95  | 0.16 | -1.18 | 0.27 | 1    | 10.11 | 1736.4  | 0.98 | 0.70 | 0.96 |
| 1338 | FFVPLFLVGILFPAI | 15 | 0.46  | 0.61 | 0.61 | 2.55  | 0    | -1.5  | 0    | 0    | 5.88  | 1693.38 | 0.94 | 0.69 | 0.97 |
| 1339 | FVPLFLVGILFPAIL | 15 | 0.45  | 0.6  | 0.6  | 2.61  | 0    | -1.45 | 0    | 0    | 5.88  | 1659.37 | 0.94 | 0.69 | 0.93 |
| 1340 | VPLFLVGILFPAILA | 15 | 0.43  | 0.58 | 0.58 | 2.55  | 0    | -1.32 | 0    | 0    | 5.88  | 1583.27 | 0.98 | 0.61 | 0.61 |
| 1341 | PLFLVGILFPAILAK | 15 | 0.32  | 0.58 | 0.58 | 2.01  | 0.24 | -1.02 | 0.13 | 1    | 9.11  | 1612.31 | 0.98 | 0.70 | 0.98 |
| 1342 | LFLVGILFPAILAKQ | 15 | 0.28  | 0.6  | 0.6  | 1.88  | 0.33 | -1.01 | 0.27 | 1    | 9.11  | 1643.33 | 0.98 | 0.63 | 0.92 |

|      |                  |    |       |      |      |       |      |       |      |      |       |         |      |      |      |
|------|------------------|----|-------|------|------|-------|------|-------|------|------|-------|---------|------|------|------|
| 1343 | FLVGILFPAILAKQF  | 15 | 0.28  | 0.62 | 0.62 | 1.81  | 0.33 | -1.05 | 0.27 | 1    | 9.11  | 1677.34 | 0.94 | 0.60 | 0.98 |
| 1344 | LVGILFPAILAKQFT  | 15 | 0.23  | 0.6  | 0.6  | 1.58  | 0.33 | -0.91 | 0.33 | 1    | 9.11  | 1631.27 | 0.98 | 0.50 | 0.83 |
| 1345 | VGILFPAILAKQFTK  | 15 | 0.12  | 0.61 | 0.61 | 1.07  | 0.57 | -0.59 | 0.47 | 2    | 10.02 | 1646.28 | 0.98 | 0.56 | 0.99 |
| 1346 | GILFPAILAKQFTKC  | 15 | 0.09  | 0.61 | 0.61 | 0.95  | 0.57 | -0.56 | 0.47 | 2    | 9.36  | 1650.28 | 0.95 | 0.63 | 0.98 |
| 1347 | ILFPAILAKQFTKCE  | 15 | 0.03  | 0.61 | 0.61 | 0.75  | 0.66 | -0.36 | 0.53 | 1    | 8.54  | 1722.34 | 0.93 | 0.65 | 0.97 |
| 1348 | LFPAILAKQFTKCEL  | 15 | 0.02  | 0.6  | 0.6  | 0.7   | 0.66 | -0.36 | 0.53 | 1    | 8.54  | 1722.34 | 0.93 | 0.56 | 0.87 |
| 1349 | FPAILAKQFTKCELS  | 15 | -0.03 | 0.6  | 0.6  | 0.39  | 0.66 | -0.22 | 0.6  | 1    | 8.54  | 1696.25 | 0.94 | 0.58 | 0.93 |
| 1350 | PAILAKQFTKCELSQ  | 15 | -0.12 | 0.6  | 0.6  | -0.03 | 0.74 | -0.04 | 0.73 | 1    | 8.54  | 1677.21 | 0.98 | 0.58 | 0.54 |
| 1351 | AILAKQFTKCELSQL  | 15 | -0.08 | 0.61 | 0.61 | 0.33  | 0.74 | -0.16 | 0.73 | 1    | 8.54  | 1693.26 | 0.80 | 0.48 | 0.50 |
| 1352 | ILAKQFTKCELSQLL  | 15 | -0.06 | 0.61 | 0.61 | 0.47  | 0.74 | -0.25 | 0.73 | 1    | 8.54  | 1735.35 | 0.99 | 0.49 | 0.77 |
| 1353 | LAKQFTKCELSQLLK  | 15 | -0.18 | 0.61 | 0.61 | -0.09 | 0.99 | 0.07  | 0.87 | 2    | 9.25  | 1750.36 | 0.99 | 0.45 | 0.92 |
| 1354 | AKQFTKCELSQLLKD  | 15 | -0.26 | 0.62 | 0.62 | -0.58 | 0.99 | 0.39  | 0.93 | 1    | 8.51  | 1752.28 | 0.86 | 0.37 | 0.59 |
| 1355 | KQFTKCELSQLLKDI  | 15 | -0.23 | 0.63 | 0.63 | -0.4  | 0.99 | 0.31  | 0.93 | 1    | 8.51  | 1794.37 | 0.99 | 0.35 | 0.49 |
| 1356 | QFTKCELSQLLKDID  | 15 | -0.21 | 0.64 | 0.64 | -0.37 | 0.74 | 0.31  | 0.87 | -1   | 4.56  | 1781.28 | 0.94 | 0.33 | 0.10 |
| 1357 | FTKCELSQLLKDIDG  | 15 | -0.15 | 0.64 | 0.64 | -0.17 | 0.66 | 0.29  | 0.73 | -1   | 4.56  | 1710.2  | 0.61 | 0.32 | 0.12 |
| 1358 | TKCELSQLLKDIDGY  | 15 | -0.19 | 0.64 | 0.64 | -0.44 | 0.66 | 0.31  | 0.8  | -1   | 4.56  | 1726.2  | 0.99 | 0.32 | 0.04 |
| 1359 | KCELSQLLKDIDGYG  | 15 | -0.17 | 0.65 | 0.65 | -0.42 | 0.66 | 0.33  | 0.73 | -1   | 4.56  | 1682.15 | 0.99 | 0.30 | 0.11 |
| 1360 | CELSQLLKDIDGYGG  | 15 | -0.08 | 0.65 | 0.65 | -0.19 | 0.41 | 0.13  | 0.6  | -2   | 4.03  | 1611.03 | 0.61 | 0.29 | 0.04 |
| 1361 | ELSQLLKDIDGYGGI  | 15 | -0.04 | 0.65 | 0.65 | -0.05 | 0.41 | 0.08  | 0.6  | -2   | 4.03  | 1621.06 | 0.61 | 0.29 | 0.03 |
| 1362 | LSQLLKDIDGYGGIA  | 15 | 0.02  | 0.64 | 0.64 | 0.3   | 0.33 | -0.15 | 0.53 | -1   | 4.21  | 1563.02 | 0.99 | 0.32 | 0.10 |
| 1363 | SQLLKDIDGYGGIAL  | 15 | 0.02  | 0.64 | 0.64 | 0.3   | 0.33 | -0.15 | 0.53 | -1   | 4.21  | 1563.02 | 0.99 | 0.37 | 0.14 |
| 1364 | QLLKDIDGYGGIALP  | 15 | 0.03  | 0.63 | 0.63 | 0.25  | 0.33 | -0.17 | 0.47 | -1   | 4.21  | 1573.06 | 0.94 | 0.43 | 0.11 |
| 1365 | LLKDIDGYGGIALPE  | 15 | 0.04  | 0.63 | 0.63 | 0.25  | 0.33 | 0.01  | 0.4  | -2   | 4.03  | 1574.04 | 0.99 | 0.51 | 0.09 |
| 1366 | LKDIDGYGGIALPEL  | 15 | 0.04  | 0.63 | 0.63 | 0.25  | 0.33 | 0.01  | 0.4  | -2   | 4.03  | 1574.04 | 0.99 | 0.48 | 0.06 |
| 1367 | KDIDGYGGIALPELI  | 15 | 0.05  | 0.64 | 0.64 | 0.29  | 0.33 | 0.01  | 0.4  | -2   | 4.03  | 1574.04 | 0.99 | 0.48 | 0.04 |
| 1368 | DIDGYGGIALPELIC  | 15 | 0.13  | 0.64 | 0.64 | 0.72  | 0.08 | -0.25 | 0.27 | -3   | 3.5   | 1549    | 0.86 | 0.53 | 0.11 |
| 1369 | IDGYGGIALPELICT  | 15 | 0.16  | 0.62 | 0.62 | 0.91  | 0.08 | -0.48 | 0.27 | -2   | 3.67  | 1535.02 | 0.97 | 0.54 | 0.17 |
| 1370 | DGYGGIALPELICTM  | 15 | 0.13  | 0.63 | 0.63 | 0.73  | 0.08 | -0.45 | 0.27 | -2   | 3.67  | 1553.05 | 0.86 | 0.56 | 0.06 |
| 1371 | GYGGIALPELICTMF  | 15 | 0.22  | 0.63 | 0.63 | 1.15  | 0.08 | -0.81 | 0.2  | -1   | 4     | 1585.14 | 0.98 | 0.53 | 0.56 |
| 1372 | YGGIALPELICTMFH  | 15 | 0.18  | 0.58 | 0.58 | 0.97  | 0.18 | -0.85 | 0.27 | -0.5 | 5.25  | 1665.23 | 0.97 | 0.61 | 0.25 |
| 1373 | GGIALPELICTMFHTS | 15 | 0.17  | 0.57 | 0.57 | 1.01  | 0.18 | -0.72 | 0.27 | -0.5 | 5.25  | 1603.16 | 0.98 | 0.59 | 0.27 |
| 1374 | GIALPELICTMFHTS  | 15 | 0.14  | 0.56 | 0.56 | 0.98  | 0.18 | -0.7  | 0.33 | -0.5 | 5.25  | 1633.18 | 0.98 | 0.51 | 0.46 |
| 1375 | IALPELICTMFHTSG  | 15 | 0.14  | 0.56 | 0.56 | 0.98  | 0.18 | -0.7  | 0.33 | -0.5 | 5.25  | 1633.18 | 0.97 | 0.42 | 0.21 |
| 1376 | ALPELICTMFHTSGY  | 15 | 0.09  | 0.56 | 0.56 | 0.59  | 0.18 | -0.73 | 0.4  | -0.5 | 5.25  | 1683.19 | 0.80 | 0.36 | 0.11 |
| 1377 | PELICTMFHTSGYD   | 15 | 0.03  | 0.58 | 0.58 | 0.24  | 0.18 | -0.5  | 0.47 | -1.5 | 4.36  | 1727.2  | 0.98 | 0.36 | 0.06 |
| 1378 | PELICTMFHTSGYDT  | 15 | -0.02 | 0.58 | 0.58 | -0.06 | 0.18 | -0.41 | 0.53 | -1.5 | 4.36  | 1715.14 | 0.87 | 0.31 | 0.04 |
| 1379 | ELICTMFHTSGYDTQ  | 15 | -0.06 | 0.6  | 0.6  | -0.19 | 0.26 | -0.39 | 0.67 | -1.5 | 4.36  | 1746.16 | 0.80 | 0.32 | 0.03 |
| 1380 | LICTMFHTSGYDTQA  | 15 | 0     | 0.59 | 0.59 | 0.17  | 0.18 | -0.63 | 0.6  | -0.5 | 5.09  | 1688.12 | 0.98 | 0.36 | 0.26 |
| 1381 | ICTMFHTSGYDTQAI  | 15 | 0.01  | 0.6  | 0.6  | 0.21  | 0.18 | -0.63 | 0.6  | -0.5 | 5.09  | 1688.12 | 0.93 | 0.33 | 0.29 |
| 1382 | CTMFHTSGYDTQAIV  | 15 | 0     | 0.6  | 0.6  | 0.19  | 0.18 | -0.61 | 0.6  | -0.5 | 5.09  | 1674.09 | 0.94 | 0.39 | 0.11 |
| 1383 | TMFHTSGYDTQAIVE  | 15 | -0.04 | 0.6  | 0.6  | -0.21 | 0.26 | -0.34 | 0.67 | -1.5 | 4.36  | 1700.07 | 0.98 | 0.38 | 0.13 |
| 1384 | MFHTSGYDTQAIVEN  | 15 | -0.07 | 0.62 | 0.62 | -0.39 | 0.26 | -0.3  | 0.73 | -1.5 | 4.36  | 1713.07 | 0.98 | 0.39 | 0.07 |
| 1385 | FHTSGYDTQAIVENN  | 15 | -0.13 | 0.62 | 0.62 | -0.75 | 0.26 | -0.2  | 0.87 | -1.5 | 4.36  | 1695.98 | 0.94 | 0.39 | 0.05 |
| 1386 | HTSGYDTQAIVENNE  | 15 | -0.22 | 0.61 | 0.61 | -1.17 | 0.35 | 0.17  | 0.93 | -2.5 | 4.14  | 1677.92 | 0.93 | 0.31 | 0.03 |
| 1387 | TSGYDTQAIVENNES  | 15 | -0.21 | 0.65 | 0.65 | -1.01 | 0.25 | 0.22  | 0.93 | -3   | 3.58  | 1627.85 | 0.93 | 0.26 | 0.03 |
| 1388 | SGYDTQAIVENNEST  | 15 | -0.21 | 0.65 | 0.65 | -1.01 | 0.25 | 0.22  | 0.93 | -3   | 3.58  | 1627.85 | 0.93 | 0.31 | 0.03 |
| 1389 | GYDTQAIVENNESTE  | 15 | -0.23 | 0.66 | 0.66 | -1.19 | 0.34 | 0.4   | 0.93 | -4   | 3.51  | 1669.89 | 0.83 | 0.35 | 0.03 |
| 1390 | YDTQAIVENNESTEY  | 15 | -0.24 | 0.66 | 0.66 | -1.25 | 0.34 | 0.25  | 1    | -4   | 3.51  | 1776.01 | 0.98 | 0.39 | 0.06 |
| 1391 | DTQAIVENNESTEYG  | 15 | -0.23 | 0.66 | 0.66 | -1.19 | 0.34 | 0.4   | 0.93 | -4   | 3.51  | 1669.89 | 0.94 | 0.39 | 0.04 |
| 1392 | TQAIVENNESTEYGL  | 15 | -0.15 | 0.64 | 0.64 | -0.71 | 0.34 | 0.08  | 0.87 | -3   | 3.68  | 1667.97 | 0.98 | 0.40 | 0.06 |
| 1393 | QAIVENNESTEYGLF  | 15 | -0.1  | 0.66 | 0.66 | -0.47 | 0.34 | -0.06 | 0.8  | -3   | 3.68  | 1714.04 | 0.99 | 0.43 | 0.08 |
| 1394 | AIVENNESTEYGLFQ  | 15 | -0.1  | 0.66 | 0.66 | -0.47 | 0.34 | -0.06 | 0.8  | -3   | 3.68  | 1714.04 | 0.80 | 0.47 | 0.08 |
| 1395 | IVENNESTEYGLFQI  | 15 | -0.06 | 0.67 | 0.67 | -0.29 | 0.34 | -0.15 | 0.8  | -3   | 3.68  | 1756.13 | 0.94 | 0.49 | 0.08 |
| 1396 | VENNESTEYGLFQIS  | 15 | -0.13 | 0.66 | 0.66 | -0.65 | 0.34 | -0.01 | 0.87 | -3   | 3.68  | 1730.04 | 0.99 | 0.48 | 0.08 |
| 1397 | ENNESTEYGLFQISN  | 15 | -0.21 | 0.66 | 0.66 | -1.16 | 0.34 | 0.11  | 1    | -3   | 3.68  | 1745.01 | 0.61 | 0.42 | 0.07 |
| 1398 | NNESTEYGLFQISNK  | 15 | -0.24 | 0.66 | 0.66 | -1.19 | 0.5  | 0.11  | 1.07 | -1   | 4.54  | 1744.07 | 0.94 | 0.40 | 0.05 |
| 1399 | NESTEYGLFQISNKL  | 15 | -0.16 | 0.64 | 0.64 | -0.7  | 0.5  | -0.03 | 0.93 | -1   | 4.54  | 1743.13 | 0.99 | 0.43 | 0.12 |
| 1400 | ESTEYGLFQISNKLW  | 15 | -0.09 | 0.63 | 0.63 | -0.53 | 0.5  | -0.27 | 0.87 | -1   | 4.54  | 1815.24 | 0.61 | 0.49 | 0.11 |
| 1401 | STEYGLFQISNKLWC  | 15 | -0.05 | 0.62 | 0.62 | -0.13 | 0.41 | -0.53 | 0.8  | 0    | 6.32  | 1789.26 | 0.97 | 0.50 | 0.58 |
| 1402 | TEYGLFQISNKLWCK  | 15 | -0.11 | 0.63 | 0.63 | -0.33 | 0.66 | -0.35 | 0.87 | 1    | 8.51  | 1830.36 | 0.97 | 0.48 | 0.60 |
| 1403 | EYGLFQISNKLWCKS  | 15 | -0.11 | 0.63 | 0.63 | -0.34 | 0.66 | -0.31 | 0.87 | 1    | 8.51  | 1816.33 | 0.61 | 0.52 | 0.84 |
| 1404 | YGLFQISNKLWCKSS  | 15 | -0.09 | 0.62 | 0.62 | -0.16 | 0.57 | -0.49 | 0.87 | 2    | 9.25  | 1774.29 | 0.99 | 0.58 | 0.95 |
| 1405 | GLFQISNKLWCKSSQ  | 15 | -0.14 | 0.62 | 0.62 | -0.31 | 0.66 | -0.32 | 0.93 | 2    | 9.36  | 1739.25 | 0.98 | 0.58 | 0.97 |
| 1406 | LFQISNKLWCKSSQV  | 15 | -0.11 | 0.62 | 0.62 | 0     | 0.66 | -0.42 | 0.93 | 2    | 9.36  | 1781.33 | 0.94 | 0.59 | 0.51 |



|      |                  |    |       |      |      |       |      |       |      |      |       |         |      |      |      |
|------|------------------|----|-------|------|------|-------|------|-------|------|------|-------|---------|------|------|------|
| 1407 | FQISNKLWCKSSQVP  | 15 | -0.15 | 0.61 | 0.61 | -0.36 | 0.66 | -0.3  | 0.93 | 2    | 9.36  | 1765.28 | 0.61 | 0.53 | 0.29 |
| 1408 | QISNKLWCKSSQPQ   | 15 | -0.24 | 0.61 | 0.61 | -0.78 | 0.74 | -0.12 | 1.07 | 2    | 9.36  | 1746.24 | 0.99 | 0.54 | 0.09 |
| 1409 | ISNKLWCKSSQPQS   | 15 | -0.21 | 0.6  | 0.6  | -0.6  | 0.66 | -0.11 | 1    | 2    | 9.36  | 1705.18 | 0.99 | 0.52 | 0.05 |
| 1410 | SNKLWCKSSQVPQSR  | 15 | -0.37 | 0.6  | 0.6  | -1.2  | 0.82 | 0.21  | 1.27 | 3    | 10.07 | 1748.2  | 0.99 | 0.43 | 0.10 |
| 1411 | NKLWCKSSQVPQSRN  | 15 | -0.4  | 0.61 | 0.61 | -1.38 | 0.82 | 0.2   | 1.33 | 3    | 10.07 | 1775.23 | 0.99 | 0.43 | 0.46 |
| 1412 | KLWCKSSQVPQSRNI  | 15 | -0.31 | 0.61 | 0.61 | -0.85 | 0.82 | 0.07  | 1.2  | 3    | 10.07 | 1774.29 | 0.99 | 0.43 | 0.65 |
| 1413 | LWCKSSQVPQSRNIC  | 15 | -0.23 | 0.61 | 0.61 | -0.42 | 0.57 | -0.2  | 1.07 | 2    | 9.03  | 1749.25 | 0.99 | 0.41 | 0.67 |
| 1414 | WCKSSQVPQSRNICD  | 15 | -0.32 | 0.62 | 0.62 | -0.91 | 0.57 | 0.12  | 1.13 | 1    | 8.38  | 1751.17 | 0.97 | 0.43 | 0.61 |
| 1415 | CKSSQVPQSRNICDI  | 15 | -0.29 | 0.64 | 0.64 | -0.55 | 0.57 | 0.23  | 1.07 | 1    | 8.38  | 1678.12 | 0.86 | 0.43 | 0.11 |
| 1416 | KSSQVPQSRNICDIS  | 15 | -0.31 | 0.63 | 0.63 | -0.77 | 0.57 | 0.31  | 1.13 | 1    | 8.57  | 1662.06 | 0.99 | 0.51 | 0.04 |
| 1417 | SSQVPQSRNICDISC  | 15 | -0.24 | 0.63 | 0.63 | -0.34 | 0.33 | 0.05  | 1    | 0    | 6.13  | 1637.02 | 0.99 | 0.49 | 0.42 |
| 1418 | SQVPQSRNICDISCD  | 15 | -0.27 | 0.64 | 0.64 | -0.52 | 0.33 | 0.23  | 1    | -1   | 4.21  | 1665.03 | 0.99 | 0.49 | 0.23 |
| 1419 | QVPQSRNICDISCDK  | 15 | -0.32 | 0.65 | 0.65 | -0.73 | 0.57 | 0.41  | 1.07 | 0    | 6.25  | 1706.13 | 0.99 | 0.47 | 0.13 |
| 1420 | VPQSRNICDISCDKF  | 15 | -0.24 | 0.65 | 0.65 | -0.31 | 0.49 | 0.23  | 0.93 | 0    | 6.25  | 1725.17 | 0.99 | 0.49 | 0.47 |
| 1421 | PQSRNICDISCDKFL  | 15 | -0.24 | 0.64 | 0.64 | -0.33 | 0.49 | 0.21  | 0.93 | 0    | 6.25  | 1739.2  | 0.87 | 0.54 | 0.59 |
| 1422 | QSRNICDISCDKFLD  | 15 | -0.28 | 0.67 | 0.67 | -0.46 | 0.49 | 0.41  | 1    | -1   | 4.43  | 1757.17 | 0.99 | 0.41 | 0.36 |
| 1423 | SRNICDISCDKFLDD  | 15 | -0.28 | 0.67 | 0.67 | -0.46 | 0.41 | 0.59  | 0.93 | -2   | 4.14  | 1744.12 | 0.99 | 0.42 | 0.28 |
| 1424 | RNICDISCDKFLDDD  | 15 | -0.31 | 0.69 | 0.69 | -0.64 | 0.41 | 0.77  | 0.93 | -3   | 3.98  | 1772.13 | 0.99 | 0.41 | 0.19 |
| 1425 | NICDISCDKFLDDDI  | 15 | -0.15 | 0.69 | 0.69 | -0.04 | 0.24 | 0.45  | 0.67 | -4   | 3.66  | 1729.11 | 0.98 | 0.39 | 0.19 |
| 1426 | ICDISCDKFLDDDIT  | 15 | -0.12 | 0.67 | 0.67 | 0.15  | 0.24 | 0.41  | 0.6  | -4   | 3.66  | 1716.11 | 0.98 | 0.39 | 0.09 |
| 1427 | CDISCDKFLDDDITD  | 15 | -0.21 | 0.68 | 0.68 | -0.39 | 0.24 | 0.73  | 0.67 | -5   | 3.57  | 1718.03 | 0.61 | 0.37 | 0.03 |
| 1428 | DISCDKFLDDDITDD  | 15 | -0.26 | 0.69 | 0.69 | -0.79 | 0.24 | 1     | 0.73 | -6   | 3.5   | 1729.98 | 0.61 | 0.37 | 0.03 |
| 1429 | ISCDKFLDDDITDDI  | 15 | -0.17 | 0.68 | 0.68 | -0.25 | 0.24 | 0.68  | 0.67 | -5   | 3.57  | 1728.06 | 0.99 | 0.37 | 0.03 |
| 1430 | SCDKFLDDDITDDIM  | 15 | -0.2  | 0.69 | 0.69 | -0.43 | 0.24 | 0.71  | 0.67 | -5   | 3.57  | 1746.09 | 0.99 | 0.36 | 0.12 |
| 1431 | CDKFLDDDITDDIMC  | 15 | -0.18 | 0.69 | 0.69 | -0.21 | 0.24 | 0.63  | 0.6  | -5   | 3.57  | 1762.15 | 0.61 | 0.35 | 0.05 |
| 1432 | DKFLDDDITDDIMCA  | 15 | -0.16 | 0.69 | 0.69 | -0.25 | 0.24 | 0.66  | 0.6  | -5   | 3.57  | 1730.09 | 0.61 | 0.35 | 0.02 |
| 1433 | FLDDDITDDIMCAK   | 15 | -0.19 | 0.68 | 0.68 | -0.28 | 0.49 | 0.66  | 0.67 | -3   | 3.98  | 1743.18 | 0.99 | 0.45 | 0.03 |
| 1434 | KLDDDITDDIMCAKK  | 15 | -0.19 | 0.68 | 0.68 | -0.28 | 0.49 | 0.66  | 0.67 | -3   | 3.98  | 1743.18 | 0.61 | 0.48 | 0.15 |
| 1435 | LDDDITDDIMCAKKI  | 15 | -0.18 | 0.68 | 0.68 | -0.17 | 0.49 | 0.71  | 0.67 | -3   | 3.98  | 1709.17 | 0.99 | 0.47 | 0.03 |
| 1436 | DDDITDDIMCAKKIL  | 15 | -0.18 | 0.68 | 0.68 | -0.17 | 0.49 | 0.71  | 0.67 | -3   | 3.98  | 1709.17 | 0.61 | 0.65 | 0.10 |
| 1437 | DDITDDIMCAKKILD  | 15 | -0.18 | 0.68 | 0.68 | -0.17 | 0.49 | 0.71  | 0.67 | -3   | 3.98  | 1709.17 | 0.86 | 0.52 | 0.05 |
| 1438 | DITDDIMCAKKILDI  | 15 | -0.08 | 0.68 | 0.68 | 0.37  | 0.49 | 0.39  | 0.6  | -2   | 4.14  | 1707.25 | 0.61 | 0.52 | 0.13 |
| 1439 | ITDDIMCAKKILDIK  | 15 | -0.11 | 0.67 | 0.67 | 0.34  | 0.73 | 0.39  | 0.67 | 0    | 6.35  | 1720.34 | 0.99 | 0.53 | 0.45 |
| 1440 | TDDIMCAKKILDIKG  | 15 | -0.15 | 0.67 | 0.67 | 0.01  | 0.73 | 0.51  | 0.67 | 0    | 6.35  | 1664.23 | 0.99 | 0.43 | 0.57 |
| 1441 | DDIMCAKKILDIKIG  | 15 | -0.09 | 0.68 | 0.68 | 0.36  | 0.73 | 0.41  | 0.6  | 0    | 6.35  | 1676.29 | 0.61 | 0.43 | 0.65 |
| 1442 | DIMCAKKILDIKIGD  | 15 | -0.09 | 0.68 | 0.68 | 0.36  | 0.73 | 0.41  | 0.6  | 0    | 6.35  | 1676.29 | 0.61 | 0.41 | 0.88 |
| 1443 | IMCAKKILDIKIGIDY | 15 | -0.04 | 0.68 | 0.68 | 0.51  | 0.73 | 0.06  | 0.6  | 1    | 8.48  | 1724.38 | 0.99 | 0.42 | 0.96 |
| 1444 | MCAKKILDIKIGIDYW | 15 | -0.06 | 0.67 | 0.67 | 0.15  | 0.73 | -0.05 | 0.67 | 1    | 8.48  | 1797.43 | 0.98 | 0.51 | 0.97 |
| 1445 | CAKKILDIKIGIDYWL | 15 | -0.04 | 0.65 | 0.65 | 0.27  | 0.73 | -0.08 | 0.67 | 1    | 8.48  | 1779.4  | 0.69 | 0.50 | 0.98 |
| 1446 | AKKILDIKIGIDYWLA | 15 | -0.03 | 0.64 | 0.64 | 0.23  | 0.73 | -0.05 | 0.67 | 1    | 8.76  | 1747.34 | 0.80 | 0.51 | 0.98 |
| 1447 | KKILDIKIGIDYWLAH | 15 | -0.07 | 0.61 | 0.61 | -0.11 | 0.83 | -0.05 | 0.73 | 1.5  | 8.76  | 1813.41 | 0.98 | 0.47 | 0.78 |
| 1448 | KILDIKIGIDYWLAHK | 15 | -0.07 | 0.61 | 0.61 | -0.11 | 0.83 | -0.05 | 0.73 | 1.5  | 8.76  | 1813.41 | 0.99 | 0.45 | 0.70 |
| 1449 | ILDIKIGIDYWLAHKA | 15 | 0.02  | 0.6  | 0.6  | 0.27  | 0.59 | -0.28 | 0.6  | 0.5  | 7.09  | 1756.31 | 0.99 | 0.49 | 0.56 |
| 1450 | LDIKIGIDYWLAHKAL | 15 | 0     | 0.59 | 0.59 | 0.23  | 0.59 | -0.28 | 0.6  | 0.5  | 7.09  | 1756.31 | 0.99 | 0.44 | 0.58 |
| 1451 | DIKIGIDYWLAHKALC | 15 | -0.03 | 0.59 | 0.59 | 0.14  | 0.59 | -0.23 | 0.6  | 0.5  | 7.06  | 1746.28 | 0.94 | 0.51 | 0.85 |
| 1452 | IKGIDYWLAHKALCT  | 15 | 0.01  | 0.58 | 0.58 | 0.33  | 0.59 | -0.45 | 0.6  | 1.5  | 8.51  | 1732.3  | 0.97 | 0.53 | 0.83 |
| 1453 | KGIDYWLAHKALCTE  | 15 | -0.08 | 0.58 | 0.58 | -0.21 | 0.67 | -0.13 | 0.67 | 0.5  | 7.06  | 1748.25 | 0.99 | 0.52 | 0.60 |
| 1454 | GIDYWLAHKALCTEKL | 15 | -0.08 | 0.58 | 0.58 | -0.21 | 0.67 | -0.13 | 0.67 | 0.5  | 7.06  | 1748.25 | 0.98 | 0.50 | 0.69 |
| 1455 | IDYWLAHKALCTEKL  | 15 | -0.06 | 0.57 | 0.57 | 0.07  | 0.67 | -0.25 | 0.67 | 0.5  | 7.06  | 1804.36 | 0.99 | 0.49 | 0.90 |
| 1456 | DYWLAHKALCTEKL   | 15 | -0.15 | 0.56 | 0.56 | -0.46 | 0.76 | 0.07  | 0.73 | -0.5 | 5.46  | 1820.31 | 0.86 | 0.48 | 0.50 |
| 1457 | YWLAKALCTEKL     | 15 | -0.15 | 0.56 | 0.56 | -0.46 | 0.84 | -0.12 | 0.8  | 0.5  | 7.06  | 1833.36 | 0.99 | 0.43 | 0.57 |
| 1458 | WLAKALCTEKL      | 15 | -0.12 | 0.55 | 0.55 | -0.43 | 0.84 | -0.19 | 0.8  | 0.5  | 7.07  | 1856.4  | 0.99 | 0.37 | 0.83 |
| 1459 | LAKALCTEKL       | 15 | -0.11 | 0.55 | 0.55 | -0.12 | 0.84 | -0.09 | 0.73 | 0.5  | 7.07  | 1783.35 | 0.99 | 0.37 | 0.90 |
| 1460 | AHKALCTEKL       | 15 | -0.14 | 0.55 | 0.55 | -0.21 | 0.84 | -0.03 | 0.73 | 0.5  | 7.04  | 1773.32 | 0.86 | 0.28 | 0.85 |
| 1461 | HKALCTEKL        | 15 | -0.2  | 0.56 | 0.56 | -0.56 | 0.92 | 0.2   | 0.8  | -0.5 | 5.51  | 1831.36 | 0.98 | 0.21 | 0.21 |
| 1462 | KALCTEKL         | 15 | -0.25 | 0.61 | 0.61 | -0.61 | 1.07 | 0.43  | 0.87 | 0    | 6.51  | 1822.39 | 0.99 | 0.23 | 0.36 |
| 1463 | ALCTEKL          | 15 | -0.14 | 0.6  | 0.6  | -0.09 | 0.83 | 0.11  | 0.73 | -1   | 4.79  | 1807.38 | 0.61 | 0.19 | 0.65 |
| 1464 | MRFFVPLFLVGLFPA  | 16 | 0.29  | 0.62 | 0.62 | 1.94  | 0.15 | -1.19 | 0.25 | 1    | 10.11 | 1867.61 | 0.93 | 0.67 | 0.97 |
| 1465 | RFFVPLFLVGLFPAI  | 16 | 0.32  | 0.61 | 0.61 | 2.11  | 0.15 | -1.22 | 0.25 | 1    | 10.11 | 1849.58 | 0.93 | 0.66 | 0.97 |
| 1466 | FFVPLFLVGLFPAIL  | 16 | 0.46  | 0.6  | 0.6  | 2.62  | 0    | -1.52 | 0    | 0    | 5.88  | 1806.56 | 0.94 | 0.68 | 0.97 |
| 1467 | FVPLFLVGLFPAILA  | 16 | 0.44  | 0.59 | 0.59 | 2.56  | 0    | -1.39 | 0    | 0    | 5.88  | 1730.46 | 0.94 | 0.67 | 0.89 |
| 1468 | VPLFLVGLFPAILAK  | 16 | 0.33  | 0.59 | 0.59 | 2.14  | 0.23 | -1.05 | 0.12 | 1    | 9.11  | 1711.46 | 0.98 | 0.69 | 0.98 |
| 1469 | PLFLVGLFPAILAKQ  | 16 | 0.25  | 0.59 | 0.59 | 1.66  | 0.31 | -0.94 | 0.25 | 1    | 9.11  | 1740.46 | 0.98 | 0.65 | 0.98 |
| 1470 | LFLVGLFPAILAKQF  | 16 | 0.3   | 0.61 | 0.61 | 1.94  | 0.31 | -1.1  | 0.25 | 1    | 9.11  | 1790.52 | 0.98 | 0.64 | 0.98 |

|      |                   |    |       |      |      |       |      |       |      |      |       |         |      |      |      |
|------|-------------------|----|-------|------|------|-------|------|-------|------|------|-------|---------|------|------|------|
| 1471 | FLVGLFPAILAKQFT   | 16 | 0.25  | 0.61 | 0.61 | 1.66  | 0.31 | -1.01 | 0.31 | 1    | 9.11  | 1778.46 | 0.94 | 0.54 | 0.95 |
| 1472 | LVGLFPAILAKQFTK   | 16 | 0.15  | 0.61 | 0.61 | 1.24  | 0.54 | -0.67 | 0.44 | 2    | 10.02 | 1759.46 | 0.98 | 0.51 | 0.97 |
| 1473 | VGILFPAILAKQFTKC  | 16 | 0.12  | 0.61 | 0.61 | 1.16  | 0.54 | -0.62 | 0.44 | 2    | 9.36  | 1749.43 | 0.93 | 0.58 | 0.98 |
| 1474 | GILFPAILAKQFTKCE  | 16 | 0.04  | 0.61 | 0.61 | 0.68  | 0.62 | -0.34 | 0.5  | 1    | 8.54  | 1779.41 | 0.95 | 0.61 | 0.99 |
| 1475 | ILFPAILAKQFTKCEL  | 16 | 0.07  | 0.6  | 0.6  | 0.94  | 0.62 | -0.45 | 0.5  | 1    | 8.54  | 1835.52 | 0.93 | 0.58 | 0.87 |
| 1476 | LFPAILAKQFTKCELS  | 16 | 0     | 0.59 | 0.59 | 0.61  | 0.62 | -0.32 | 0.56 | 1    | 8.54  | 1809.43 | 0.93 | 0.57 | 0.79 |
| 1477 | FPAILAKQFTKCELSQ  | 16 | -0.07 | 0.6  | 0.6  | 0.15  | 0.69 | -0.19 | 0.69 | 1    | 8.54  | 1824.4  | 0.94 | 0.59 | 0.72 |
| 1478 | PAILAKQFTKCELSQL  | 16 | -0.08 | 0.59 | 0.59 | 0.21  | 0.69 | -0.15 | 0.69 | 1    | 8.54  | 1790.39 | 0.98 | 0.54 | 0.37 |
| 1479 | AILAKQFTKCELSQLL  | 16 | -0.04 | 0.6  | 0.6  | 0.55  | 0.69 | -0.26 | 0.69 | 1    | 8.54  | 1806.44 | 0.80 | 0.47 | 0.81 |
| 1480 | ILAKQFTKCELSQLLK  | 16 | -0.12 | 0.61 | 0.61 | 0.19  | 0.92 | -0.04 | 0.81 | 2    | 9.25  | 1863.54 | 0.99 | 0.52 | 0.84 |
| 1481 | LAKQFTKCELSQLLKD  | 16 | -0.22 | 0.62 | 0.62 | -0.31 | 0.92 | 0.26  | 0.88 | 1    | 8.51  | 1865.46 | 0.99 | 0.43 | 0.88 |
| 1482 | AKQFTKCELSQLLKDI  | 16 | -0.2  | 0.63 | 0.63 | -0.26 | 0.92 | 0.26  | 0.88 | 1    | 8.51  | 1865.46 | 0.86 | 0.35 | 0.44 |
| 1483 | KQFTKCELSQLLKDID  | 16 | -0.26 | 0.64 | 0.64 | -0.59 | 0.92 | 0.48  | 0.94 | 0    | 6.43  | 1909.47 | 0.99 | 0.34 | 0.31 |
| 1484 | QFTKCELSQLLKDIDG  | 16 | -0.18 | 0.64 | 0.64 | -0.38 | 0.69 | 0.29  | 0.81 | -1   | 4.56  | 1838.35 | 0.94 | 0.33 | 0.05 |
| 1485 | FTKCELSQLLKDIDGY  | 16 | -0.14 | 0.64 | 0.64 | -0.24 | 0.62 | 0.13  | 0.75 | -1   | 4.56  | 1873.39 | 0.61 | 0.28 | 0.14 |
| 1486 | TKCELSQLLKDIDGYG  | 16 | -0.17 | 0.64 | 0.64 | -0.44 | 0.62 | 0.29  | 0.75 | -1   | 4.56  | 1783.27 | 0.99 | 0.32 | 0.08 |
| 1487 | KCELSQLLKDIDGYGG  | 16 | -0.15 | 0.65 | 0.65 | -0.42 | 0.62 | 0.31  | 0.69 | -1   | 4.56  | 1739.22 | 0.99 | 0.30 | 0.05 |
| 1488 | CELSQLLKDIDGYGGI  | 16 | -0.03 | 0.65 | 0.65 | 0.11  | 0.39 | 0.01  | 0.56 | -2   | 4.03  | 1724.21 | 0.61 | 0.28 | 0.03 |
| 1489 | ELSQLLKDIDGYGGIA  | 16 | -0.02 | 0.65 | 0.65 | 0.06  | 0.39 | 0.04  | 0.56 | -2   | 4.03  | 1692.15 | 0.61 | 0.30 | 0.03 |
| 1490 | LSQLLKDIDGYGGIAL  | 16 | 0.05  | 0.64 | 0.64 | 0.52  | 0.31 | -0.26 | 0.5  | -1   | 4.21  | 1676.2  | 0.99 | 0.37 | 0.18 |
| 1491 | SQLLKDIDGYGGIALP  | 16 | 0.01  | 0.63 | 0.63 | 0.18  | 0.31 | -0.14 | 0.5  | -1   | 4.21  | 1660.15 | 0.99 | 0.41 | 0.21 |
| 1492 | QLLKDIDGYGGIALPE  | 16 | -0.01 | 0.64 | 0.64 | 0.01  | 0.39 | 0.02  | 0.5  | -2   | 4.03  | 1702.19 | 0.94 | 0.42 | 0.04 |
| 1493 | LLKIDIDGYGGIALPEL | 16 | 0.07  | 0.63 | 0.63 | 0.47  | 0.31 | -0.1  | 0.38 | -2   | 4.03  | 1687.22 | 0.99 | 0.49 | 0.08 |
| 1494 | LKDIDGYGGIALPELI  | 16 | 0.08  | 0.64 | 0.64 | 0.51  | 0.31 | -0.1  | 0.38 | -2   | 4.03  | 1687.22 | 0.99 | 0.46 | 0.05 |
| 1495 | KDIDGYGGIALPELIC  | 16 | 0.05  | 0.64 | 0.64 | 0.43  | 0.31 | -0.05 | 0.38 | -2   | 4.03  | 1677.19 | 0.99 | 0.48 | 0.08 |
| 1496 | DIDGYGGIALPELICT  | 16 | 0.11  | 0.63 | 0.63 | 0.63  | 0.08 | -0.26 | 0.31 | -3   | 3.5   | 1650.12 | 0.61 | 0.52 | 0.09 |
| 1497 | IDGYGGIALPELICTM  | 16 | 0.17  | 0.63 | 0.63 | 0.97  | 0.08 | -0.53 | 0.25 | -2   | 3.67  | 1666.23 | 0.97 | 0.54 | 0.13 |
| 1498 | DGYGGIALPELICTMF  | 16 | 0.16  | 0.63 | 0.63 | 0.86  | 0.08 | -0.57 | 0.25 | -2   | 3.67  | 1700.24 | 0.86 | 0.52 | 0.06 |
| 1499 | GYGGIALPELICTMFH  | 16 | 0.18  | 0.59 | 0.59 | 0.88  | 0.17 | -0.79 | 0.25 | -0.5 | 5.25  | 1722.3  | 0.98 | 0.53 | 0.53 |
| 1500 | YGGIALPELICTMFHT  | 16 | 0.16  | 0.58 | 0.58 | 0.86  | 0.17 | -0.82 | 0.31 | -0.5 | 5.25  | 1766.35 | 0.97 | 0.58 | 0.12 |
| 1501 | GGIALPELICTMFHTS  | 16 | 0.14  | 0.57 | 0.57 | 0.89  | 0.17 | -0.66 | 0.31 | -0.5 | 5.25  | 1690.25 | 0.98 | 0.50 | 0.51 |
| 1502 | GIALPELICTMFHTSG  | 16 | 0.14  | 0.57 | 0.57 | 0.89  | 0.17 | -0.66 | 0.31 | -0.5 | 5.25  | 1690.25 | 0.98 | 0.39 | 0.50 |
| 1503 | IALPELICTMFHTSGY  | 16 | 0.13  | 0.57 | 0.57 | 0.84  | 0.17 | -0.8  | 0.38 | -0.5 | 5.25  | 1796.37 | 0.99 | 0.34 | 0.15 |
| 1504 | ALPELICTMFHTSGYD  | 16 | 0.04  | 0.57 | 0.57 | 0.34  | 0.17 | -0.5  | 0.44 | -1.5 | 4.36  | 1798.29 | 0.80 | 0.34 | 0.09 |
| 1505 | LPELICTMFHTSGYDT  | 16 | 0.02  | 0.57 | 0.57 | 0.18  | 0.17 | -0.49 | 0.5  | -1.5 | 4.36  | 1828.32 | 0.98 | 0.34 | 0.05 |
| 1506 | PELICTMFHTSGYDTQ  | 16 | -0.06 | 0.58 | 0.58 | -0.28 | 0.25 | -0.37 | 0.62 | -1.5 | 4.36  | 1843.29 | 0.87 | 0.31 | 0.03 |
| 1507 | ELICTMFHTSGYDTQA  | 16 | -0.04 | 0.59 | 0.59 | -0.06 | 0.25 | -0.4  | 0.62 | -1.5 | 4.36  | 1817.25 | 0.80 | 0.31 | 0.03 |
| 1508 | LICTMFHTSGYDTQAI  | 16 | 0.05  | 0.59 | 0.59 | 0.44  | 0.17 | -0.7  | 0.56 | -0.5 | 5.09  | 1801.3  | 0.93 | 0.34 | 0.08 |
| 1509 | ICTMFHTSGYDTQAI   | 16 | 0.05  | 0.6  | 0.6  | 0.46  | 0.17 | -0.68 | 0.56 | -0.5 | 5.09  | 1787.27 | 0.93 | 0.40 | 0.30 |
| 1510 | CTMFHTSGYDTQAI    | 16 | -0.04 | 0.6  | 0.6  | -0.04 | 0.25 | -0.38 | 0.62 | -1.5 | 4.36  | 1803.22 | 0.94 | 0.40 | 0.10 |
| 1511 | TMFHTSGYDTQAI     | 16 | -0.08 | 0.61 | 0.61 | -0.41 | 0.25 | -0.31 | 0.75 | -1.5 | 4.36  | 1814.19 | 0.98 | 0.40 | 0.09 |
| 1512 | MFHTSGYDTQAI      | 16 | -0.11 | 0.63 | 0.63 | -0.59 | 0.25 | -0.27 | 0.81 | -1.5 | 4.36  | 1827.19 | 0.93 | 0.38 | 0.05 |
| 1513 | FHTSGYDTQAI       | 16 | -0.17 | 0.62 | 0.62 | -0.93 | 0.33 | 0     | 0.88 | -2.5 | 4.14  | 1825.11 | 0.94 | 0.33 | 0.03 |
| 1514 | HTSGYDTQAI        | 16 | -0.22 | 0.61 | 0.61 | -1.15 | 0.33 | 0.17  | 0.94 | -2.5 | 4.14  | 1765.01 | 0.93 | 0.29 | 0.03 |
| 1515 | TSGYDTQAI         | 16 | -0.21 | 0.64 | 0.64 | -0.99 | 0.24 | 0.18  | 0.94 | -3   | 3.58  | 1728.97 | 0.93 | 0.24 | 0.05 |
| 1516 | SGYDTQAI          | 16 | -0.23 | 0.65 | 0.65 | -1.17 | 0.32 | 0.39  | 0.94 | -4   | 3.51  | 1756.98 | 0.93 | 0.29 | 0.04 |
| 1517 | GYDTQAI           | 16 | -0.22 | 0.66 | 0.66 | -1.2  | 0.32 | 0.23  | 0.94 | -4   | 3.51  | 1833.08 | 0.83 | 0.34 | 0.03 |
| 1518 | YDTQAI            | 16 | -0.22 | 0.66 | 0.66 | -1.2  | 0.32 | 0.23  | 0.94 | -4   | 3.51  | 1833.08 | 0.98 | 0.36 | 0.03 |
| 1519 | DTQAI             | 16 | -0.18 | 0.65 | 0.65 | -0.88 | 0.32 | 0.26  | 0.88 | -4   | 3.51  | 1783.07 | 0.94 | 0.35 | 0.07 |
| 1520 | TQAI              | 16 | -0.1  | 0.65 | 0.65 | -0.49 | 0.32 | -0.08 | 0.81 | -3   | 3.68  | 1815.16 | 0.98 | 0.43 | 0.08 |
| 1521 | QAI               | 16 | -0.13 | 0.66 | 0.66 | -0.66 | 0.39 | -0.04 | 0.88 | -3   | 3.68  | 1842.19 | 0.98 | 0.41 | 0.08 |
| 1522 | AI                | 16 | -0.04 | 0.66 | 0.66 | -0.16 | 0.32 | -0.17 | 0.75 | -3   | 3.68  | 1827.22 | 0.80 | 0.49 | 0.08 |
| 1523 | IVEN              | 16 | -0.08 | 0.66 | 0.66 | -0.33 | 0.32 | -0.12 | 0.81 | -3   | 3.68  | 1843.22 | 0.94 | 0.50 | 0.08 |
| 1524 | VEN               | 16 | -0.16 | 0.66 | 0.66 | -0.82 | 0.32 | 0.01  | 0.94 | -3   | 3.68  | 1844.16 | 0.99 | 0.46 | 0.05 |
| 1525 | ENNE              | 16 | -0.26 | 0.66 | 0.66 | -1.33 | 0.55 | 0.29  | 1.06 | -2   | 4.26  | 1873.2  | 0.61 | 0.42 | 0.06 |
| 1526 | NNES              | 16 | -0.19 | 0.65 | 0.65 | -0.87 | 0.47 | -0.01 | 1    | -1   | 4.54  | 1857.25 | 0.94 | 0.43 | 0.13 |
| 1527 | NESTE             | 16 | -0.13 | 0.64 | 0.64 | -0.71 | 0.47 | -0.24 | 0.94 | -1   | 4.54  | 1929.36 | 0.99 | 0.44 | 0.09 |
| 1528 | ESTE              | 16 | -0.09 | 0.63 | 0.63 | -0.34 | 0.47 | -0.31 | 0.81 | -1   | 4.54  | 1918.39 | 0.61 | 0.52 | 0.11 |
| 1529 | STE               | 16 | -0.12 | 0.63 | 0.63 | -0.36 | 0.62 | -0.31 | 0.88 | 1    | 8.51  | 1917.45 | 0.97 | 0.47 | 0.74 |
| 1530 | TE                | 16 | -0.12 | 0.63 | 0.63 | -0.36 | 0.62 | -0.31 | 0.88 | 1    | 8.51  | 1917.45 | 0.97 | 0.51 | 0.26 |
| 1531 | EY                | 16 | -0.12 | 0.63 | 0.63 | -0.37 | 0.62 | -0.27 | 0.88 | 1    | 8.51  | 1903.42 | 0.61 | 0.57 | 0.63 |
| 1532 | Y                 | 16 | -0.13 | 0.63 | 0.63 | -0.37 | 0.61 | -0.44 | 0.94 | 2    | 9.25  | 1902.44 | 0.99 | 0.57 | 0.70 |
| 1533 | GLF               | 16 | -0.09 | 0.63 | 0.63 | -0.03 | 0.61 | -0.39 | 0.88 | 2    | 9.36  | 1838.4  | 0.98 | 0.58 | 0.93 |
| 1534 | LF                | 16 | -0.11 | 0.61 | 0.61 | -0.1  | 0.61 | -0.39 | 0.88 | 2    | 9.36  | 1878.46 | 0.94 | 0.57 | 0.39 |

|      |                    |    |       |      |      |       |      |       |      |      |       |         |      |      |      |
|------|--------------------|----|-------|------|------|-------|------|-------|------|------|-------|---------|------|------|------|
| 1535 | FQISNKLWCKSSQVPQ   | 16 | -0.18 | 0.62 | 0.62 | -0.56 | 0.69 | -0.27 | 1    | 2    | 9.36  | 1893.43 | 0.61 | 0.49 | 0.13 |
| 1536 | QISNKLWCKSSQVPQS   | 16 | -0.24 | 0.61 | 0.61 | -0.78 | 0.69 | -0.09 | 1.06 | 2    | 9.36  | 1833.33 | 0.99 | 0.51 | 0.04 |
| 1537 | ISNKLWCKSSQVPQSR   | 16 | -0.3  | 0.61 | 0.61 | -0.84 | 0.77 | 0.08  | 1.19 | 3    | 10.07 | 1861.38 | 0.99 | 0.46 | 0.06 |
| 1538 | SNKLWCKSSQVPQSRN   | 16 | -0.39 | 0.61 | 0.61 | -1.34 | 0.77 | 0.21  | 1.31 | 3    | 10.07 | 1862.32 | 0.99 | 0.42 | 0.07 |
| 1539 | NKLWCKSSQVPQSRNI   | 16 | -0.33 | 0.62 | 0.62 | -1.01 | 0.77 | 0.07  | 1.25 | 3    | 10.07 | 1888.41 | 0.99 | 0.41 | 0.18 |
| 1540 | KLWCKSSQVPQSRNIC   | 16 | -0.29 | 0.61 | 0.61 | -0.64 | 0.77 | 0     | 1.12 | 3    | 9.53  | 1877.44 | 0.99 | 0.43 | 0.86 |
| 1541 | LWCKSSQVPQSRNICD   | 16 | -0.26 | 0.62 | 0.62 | -0.61 | 0.54 | 0     | 1.06 | 1    | 8.38  | 1864.35 | 0.97 | 0.42 | 0.50 |
| 1542 | WCKSSQVPQSRNICDI   | 16 | -0.25 | 0.63 | 0.63 | -0.57 | 0.54 | 0     | 1.06 | 1    | 8.38  | 1864.35 | 0.97 | 0.43 | 0.23 |
| 1543 | CKSSQVPQSRNICDIS   | 16 | -0.29 | 0.63 | 0.63 | -0.56 | 0.54 | 0.23  | 1.06 | 1    | 8.38  | 1765.21 | 0.86 | 0.48 | 0.08 |
| 1544 | KSSQVPQSRNICDISC   | 16 | -0.29 | 0.63 | 0.63 | -0.56 | 0.54 | 0.23  | 1.06 | 1    | 8.38  | 1765.21 | 0.99 | 0.49 | 0.27 |
| 1545 | SSQVPQSRNICDISCD   | 16 | -0.27 | 0.63 | 0.63 | -0.54 | 0.31 | 0.23  | 1    | -1   | 4.21  | 1752.12 | 0.99 | 0.48 | 0.15 |
| 1546 | SQVPQSRNICDISCDK   | 16 | -0.32 | 0.64 | 0.64 | -0.73 | 0.54 | 0.4   | 1.06 | 0    | 6.25  | 1793.22 | 0.99 | 0.47 | 0.08 |
| 1547 | QVPQSRNICDISCDKF   | 16 | -0.26 | 0.65 | 0.65 | -0.51 | 0.54 | 0.23  | 1    | 0    | 6.25  | 1853.32 | 0.99 | 0.51 | 0.23 |
| 1548 | VPQSRNICDISCDKFL   | 16 | -0.19 | 0.64 | 0.64 | -0.05 | 0.46 | 0.1   | 0.88 | 0    | 6.25  | 1838.35 | 0.99 | 0.54 | 0.63 |
| 1549 | PQSRNICDISCDKFLD   | 16 | -0.27 | 0.65 | 0.65 | -0.53 | 0.46 | 0.38  | 0.94 | -1   | 4.43  | 1854.3  | 0.94 | 0.37 | 0.33 |
| 1550 | QSRNICDISCDKFLDD   | 16 | -0.31 | 0.67 | 0.67 | -0.65 | 0.46 | 0.57  | 1    | -2   | 4.14  | 1872.27 | 0.99 | 0.39 | 0.22 |
| 1551 | SRNICDISCDKFLDDD   | 16 | -0.31 | 0.68 | 0.68 | -0.65 | 0.38 | 0.74  | 0.94 | -3   | 3.98  | 1859.22 | 0.99 | 0.43 | 0.16 |
| 1552 | RNICDISCDKFLDDDI   | 16 | -0.25 | 0.69 | 0.69 | -0.32 | 0.38 | 0.61  | 0.88 | -3   | 3.98  | 1885.31 | 0.98 | 0.42 | 0.22 |
| 1553 | NICDISCDKFLDDDDIT  | 16 | -0.15 | 0.68 | 0.68 | -0.08 | 0.23 | 0.4   | 0.69 | -4   | 3.66  | 1830.23 | 0.98 | 0.41 | 0.06 |
| 1554 | ICDISCDKFLDDDDITD  | 16 | -0.15 | 0.68 | 0.68 | -0.08 | 0.23 | 0.57  | 0.62 | -5   | 3.57  | 1831.21 | 0.99 | 0.37 | 0.05 |
| 1555 | CDISCDKFLDDDDITDD  | 16 | -0.24 | 0.68 | 0.68 | -0.58 | 0.23 | 0.87  | 0.69 | -6   | 3.5   | 1833.13 | 0.61 | 0.37 | 0.03 |
| 1556 | DISCDKFLDDDDITDDI  | 16 | -0.2  | 0.69 | 0.69 | -0.46 | 0.23 | 0.82  | 0.69 | -6   | 3.5   | 1843.16 | 0.61 | 0.37 | 0.04 |
| 1557 | ISCDKFLDDDDITDDIM  | 16 | -0.14 | 0.69 | 0.69 | -0.12 | 0.23 | 0.56  | 0.62 | -5   | 3.57  | 1859.27 | 0.99 | 0.35 | 0.09 |
| 1558 | SCDKFLDDDDITDDIMC  | 16 | -0.18 | 0.68 | 0.68 | -0.24 | 0.23 | 0.61  | 0.62 | -5   | 3.57  | 1849.24 | 0.99 | 0.36 | 0.14 |
| 1559 | CDKFLDDDDITDDIMCA  | 16 | -0.15 | 0.68 | 0.68 | -0.08 | 0.23 | 0.56  | 0.56 | -5   | 3.57  | 1833.24 | 0.61 | 0.35 | 0.03 |
| 1560 | DKFLDDDDITDDIMCAK  | 16 | -0.22 | 0.69 | 0.69 | -0.48 | 0.46 | 0.81  | 0.69 | -4   | 3.86  | 1858.28 | 0.61 | 0.38 | 0.04 |
| 1561 | KFLDDDDITDDIMCAKAK | 16 | -0.25 | 0.68 | 0.68 | -0.51 | 0.69 | 0.81  | 0.75 | -2   | 4.29  | 1871.37 | 0.99 | 0.50 | 0.11 |
| 1562 | FLDDDDITDDIMCAKKI  | 16 | -0.13 | 0.68 | 0.68 | 0.02  | 0.46 | 0.51  | 0.62 | -3   | 3.98  | 1856.36 | 0.61 | 0.47 | 0.05 |
| 1563 | LDDDDITDDIMCAKKIL  | 16 | -0.14 | 0.67 | 0.67 | 0.08  | 0.46 | 0.55  | 0.62 | -3   | 3.98  | 1822.35 | 0.99 | 0.48 | 0.06 |
| 1564 | DDDDITDDIMCAKKILD  | 16 | -0.21 | 0.69 | 0.69 | -0.37 | 0.46 | 0.85  | 0.69 | -4   | 3.86  | 1824.27 | 0.61 | 0.48 | 0.04 |
| 1565 | DDITDDIMCAKKILDI   | 16 | -0.12 | 0.68 | 0.68 | 0.13  | 0.46 | 0.55  | 0.62 | -3   | 3.98  | 1822.35 | 0.86 | 0.48 | 0.07 |
| 1566 | DDITDDIMCAKKILDIK  | 16 | -0.15 | 0.68 | 0.68 | 0.1   | 0.69 | 0.55  | 0.69 | -1   | 4.58  | 1835.44 | 0.61 | 0.49 | 0.13 |
| 1567 | ITDDIMCAKKILDIK    | 16 | -0.09 | 0.67 | 0.67 | 0.29  | 0.69 | 0.36  | 0.62 | 0    | 6.35  | 1777.41 | 0.99 | 0.39 | 0.60 |
| 1568 | TDDIMCAKKILDIKGI   | 16 | -0.09 | 0.67 | 0.67 | 0.29  | 0.69 | 0.36  | 0.62 | 0    | 6.35  | 1777.41 | 0.99 | 0.38 | 0.40 |
| 1569 | DDIMCAKKILDIKID    | 16 | -0.13 | 0.69 | 0.69 | 0.12  | 0.69 | 0.57  | 0.62 | -1   | 4.58  | 1791.39 | 0.61 | 0.39 | 0.31 |
| 1570 | DIMCAKKILDIKIDY    | 16 | -0.08 | 0.68 | 0.68 | 0.26  | 0.69 | 0.24  | 0.62 | 0    | 6.35  | 1839.48 | 0.61 | 0.40 | 0.54 |
| 1571 | IMCAKKILDIKIDYW    | 16 | -0.01 | 0.67 | 0.67 | 0.42  | 0.69 | -0.16 | 0.62 | 1    | 8.48  | 1910.61 | 0.99 | 0.49 | 0.98 |
| 1572 | MCAKKILDIKIDYWL    | 16 | -0.02 | 0.66 | 0.66 | 0.38  | 0.69 | -0.16 | 0.62 | 1    | 8.48  | 1910.61 | 0.93 | 0.49 | 0.98 |
| 1573 | CAKKILDIKIDYWLA    | 16 | -0.03 | 0.64 | 0.64 | 0.37  | 0.69 | -0.11 | 0.62 | 1    | 8.48  | 1850.49 | 0.69 | 0.48 | 0.98 |
| 1574 | AKKILDIKIDYWLAH    | 16 | -0.05 | 0.6  | 0.6  | 0.01  | 0.78 | -0.07 | 0.69 | 1.5  | 8.76  | 1884.5  | 0.94 | 0.49 | 0.93 |
| 1575 | KKILDIKIDYWLAHK    | 16 | -0.14 | 0.61 | 0.61 | -0.34 | 1.01 | 0.14  | 0.81 | 2.5  | 9.43  | 1941.6  | 0.99 | 0.47 | 0.89 |
| 1576 | KILDIKIDYWLAHKA    | 16 | -0.05 | 0.6  | 0.6  | 0.01  | 0.78 | -0.08 | 0.69 | 1.5  | 8.76  | 1884.5  | 0.99 | 0.50 | 0.82 |
| 1577 | ILDIKIDYWLAHKAL    | 16 | 0.05  | 0.59 | 0.59 | 0.49  | 0.55 | -0.38 | 0.56 | 0.5  | 7.09  | 1869.49 | 0.97 | 0.46 | 0.54 |
| 1578 | LDIKIDYWLAHKALC    | 16 | 0.01  | 0.59 | 0.59 | 0.37  | 0.55 | -0.33 | 0.56 | 0.5  | 7.06  | 1859.46 | 0.98 | 0.45 | 0.69 |
| 1579 | DIKIDYWLAHKALCT    | 16 | -0.04 | 0.59 | 0.59 | 0.09  | 0.55 | -0.24 | 0.62 | 0.5  | 7.06  | 1847.4  | 0.86 | 0.53 | 0.50 |
| 1580 | IKGIDYWLAHKALCTE   | 16 | -0.03 | 0.58 | 0.58 | 0.09  | 0.63 | -0.24 | 0.62 | 0.5  | 7.06  | 1861.43 | 0.97 | 0.50 | 0.64 |
| 1581 | KGIDYWLAHKALCTEK   | 16 | -0.15 | 0.58 | 0.58 | -0.44 | 0.86 | 0.06  | 0.75 | 1.5  | 8.48  | 1876.44 | 0.99 | 0.51 | 0.75 |
| 1582 | GIDYWLAHKALCTEKL   | 16 | -0.04 | 0.57 | 0.57 | 0.04  | 0.63 | -0.24 | 0.62 | 0.5  | 7.06  | 1861.43 | 0.95 | 0.48 | 0.80 |
| 1583 | IDYWLAHKALCTEKLE   | 16 | -0.09 | 0.57 | 0.57 | -0.15 | 0.71 | -0.05 | 0.69 | -0.5 | 5.46  | 1933.49 | 0.99 | 0.47 | 0.10 |
| 1584 | DYWLAHKALCTEKLEQ   | 16 | -0.18 | 0.57 | 0.57 | -0.65 | 0.79 | 0.07  | 0.81 | -0.5 | 5.46  | 1948.46 | 0.86 | 0.43 | 0.17 |
| 1585 | YWLAHKALCTEKLEQW   | 16 | -0.11 | 0.56 | 0.56 | -0.49 | 0.79 | -0.33 | 0.81 | 0.5  | 7.06  | 2019.59 | 0.99 | 0.42 | 0.81 |
| 1586 | WLAHKALCTEKLEQWL   | 16 | -0.08 | 0.54 | 0.54 | -0.17 | 0.79 | -0.29 | 0.75 | 0.5  | 7.07  | 1969.58 | 0.99 | 0.34 | 0.90 |
| 1587 | LAHKALCTEKLEQWLC   | 16 | -0.1  | 0.55 | 0.55 | 0.04  | 0.79 | -0.14 | 0.69 | 0.5  | 7.04  | 1886.5  | 0.99 | 0.36 | 0.87 |
| 1588 | AHKALCTEKLEQWLCE   | 16 | -0.17 | 0.56 | 0.56 | -0.41 | 0.87 | 0.16  | 0.75 | -0.5 | 5.51  | 1902.45 | 0.94 | 0.27 | 0.33 |
| 1589 | HKALCTEKLEQWLCEK   | 16 | -0.26 | 0.57 | 0.57 | -0.77 | 1.09 | 0.38  | 0.88 | 0.5  | 7.04  | 1959.55 | 0.99 | 0.21 | 0.20 |
| 1590 | KALCTEKLEQWLCEKL   | 16 | -0.2  | 0.6  | 0.6  | -0.33 | 1    | 0.29  | 0.81 | 0    | 6.51  | 1935.57 | 0.99 | 0.25 | 0.68 |
| 1591 | MRFFVPLFLVGLFPAIL  | 17 | 0.31  | 0.62 | 0.62 | 2.09  | 0.14 | -1.22 | 0.24 | 1    | 10.11 | 1980.79 | 0.93 | 0.65 | 0.98 |
| 1592 | RFFVPLFLVGLFPAIL   | 17 | 0.33  | 0.61 | 0.61 | 2.21  | 0.14 | -1.25 | 0.24 | 1    | 10.11 | 1962.76 | 0.93 | 0.67 | 0.93 |
| 1593 | FFVPLFLVGLFPAILA   | 17 | 0.45  | 0.6  | 0.6  | 2.58  | 0    | -1.46 | 0    | 0    | 5.88  | 1877.65 | 0.94 | 0.65 | 0.95 |
| 1594 | FVPLFLVGLFPAILAK   | 17 | 0.35  | 0.6  | 0.6  | 2.18  | 0.22 | -1.14 | 0.12 | 1    | 9.11  | 1858.65 | 0.94 | 0.72 | 0.98 |
| 1595 | VPLFLVGLFPAILAKQ   | 17 | 0.27  | 0.6  | 0.6  | 1.81  | 0.29 | -0.98 | 0.24 | 1    | 9.11  | 1839.61 | 0.98 | 0.63 | 0.93 |
| 1596 | PLFLVGLFPAILAKQF   | 17 | 0.28  | 0.6  | 0.6  | 1.73  | 0.29 | -1.04 | 0.24 | 1    | 9.11  | 1887.65 | 0.98 | 0.64 | 0.98 |
| 1597 | LFLVGLFPAILAKQFT   | 17 | 0.27  | 0.61 | 0.61 | 1.78  | 0.29 | -1.06 | 0.29 | 1    | 9.11  | 1891.64 | 0.98 | 0.57 | 0.80 |
| 1598 | FLVGLFPAILAKQFTK   | 17 | 0.17  | 0.61 | 0.61 | 1.33  | 0.51 | -0.78 | 0.41 | 2    | 10.02 | 1906.65 | 0.94 | 0.54 | 0.99 |

|      |                   |    |       |      |      |       |      |       |      |      |      |         |      |      |      |
|------|-------------------|----|-------|------|------|-------|------|-------|------|------|------|---------|------|------|------|
| 1599 | LVGILFPAILAKQFTKC | 17 | 0.14  | 0.61 | 0.61 | 1.31  | 0.51 | -0.69 | 0.41 | 2    | 9.36 | 1862.61 | 0.93 | 0.51 | 0.99 |
| 1600 | VGILFPAILAKQFTKCE | 17 | 0.07  | 0.62 | 0.62 | 0.88  | 0.58 | -0.41 | 0.47 | 1    | 8.54 | 1878.56 | 0.93 | 0.57 | 0.98 |
| 1601 | GILFPAILAKQFTKCEL | 17 | 0.07  | 0.61 | 0.61 | 0.86  | 0.58 | -0.42 | 0.47 | 1    | 8.54 | 1892.59 | 0.83 | 0.55 | 0.97 |
| 1602 | ILFPAILAKQFTKCELS | 17 | 0.05  | 0.6  | 0.6  | 0.84  | 0.58 | -0.41 | 0.53 | 1    | 8.54 | 1922.61 | 0.93 | 0.57 | 0.89 |
| 1603 | LFPAILAKQFTKCELSQ | 17 | -0.04 | 0.6  | 0.6  | 0.36  | 0.65 | -0.29 | 0.65 | 1    | 8.54 | 1937.58 | 0.93 | 0.56 | 0.54 |
| 1604 | FPAILAKQFTKCELSQL | 17 | -0.04 | 0.6  | 0.6  | 0.36  | 0.65 | -0.29 | 0.65 | 1    | 8.54 | 1937.58 | 0.80 | 0.54 | 0.52 |
| 1605 | PAILAKQFTKCELSQLL | 17 | -0.04 | 0.59 | 0.59 | 0.42  | 0.65 | -0.25 | 0.65 | 1    | 8.54 | 1903.57 | 0.98 | 0.52 | 0.77 |
| 1606 | AILAKQFTKCELSQLLK | 17 | -0.1  | 0.61 | 0.61 | 0.29  | 0.87 | -0.07 | 0.76 | 2    | 9.25 | 1934.63 | 0.80 | 0.48 | 0.86 |
| 1607 | ILAKQFTKCELSQLLKD | 17 | -0.16 | 0.62 | 0.62 | -0.02 | 0.87 | 0.14  | 0.82 | 1    | 8.51 | 1978.64 | 0.97 | 0.50 | 0.66 |
| 1608 | LAKQFTKCELSQLLKDI | 17 | -0.16 | 0.62 | 0.62 | -0.02 | 0.87 | 0.14  | 0.82 | 1    | 8.51 | 1978.64 | 0.99 | 0.41 | 0.81 |
| 1609 | AKQFTKCELSQLLKDID | 17 | -0.23 | 0.63 | 0.63 | -0.45 | 0.87 | 0.42  | 0.88 | 0    | 6.43 | 1980.56 | 0.86 | 0.32 | 0.24 |
| 1610 | KQFTKCELSQLLKDIDG | 17 | -0.24 | 0.64 | 0.64 | -0.58 | 0.87 | 0.45  | 0.88 | 0    | 6.43 | 1966.54 | 0.99 | 0.34 | 0.07 |
| 1611 | QFTKCELSQLLKDIDGY | 17 | -0.17 | 0.65 | 0.65 | -0.43 | 0.65 | 0.14  | 0.82 | -1   | 4.56 | 2001.54 | 0.94 | 0.31 | 0.04 |
| 1612 | FTKCELSQLLKDIDGYG | 17 | -0.12 | 0.65 | 0.65 | -0.25 | 0.58 | 0.12  | 0.71 | -1   | 4.56 | 1930.46 | 0.61 | 0.30 | 0.27 |
| 1613 | TKCELSQLLKDIDGYGG | 17 | -0.15 | 0.64 | 0.64 | -0.44 | 0.58 | 0.27  | 0.71 | -1   | 4.56 | 1840.34 | 0.99 | 0.35 | 0.05 |
| 1614 | KCELSQLLKDIDGYGGI | 17 | -0.1  | 0.65 | 0.65 | -0.13 | 0.58 | 0.19  | 0.65 | -1   | 4.56 | 1852.4  | 0.99 | 0.30 | 0.03 |
| 1615 | CELSQLLKDIDGYGGIA | 17 | -0.02 | 0.64 | 0.64 | 0.21  | 0.36 | -0.02 | 0.53 | -2   | 4.03 | 1795.3  | 0.61 | 0.28 | 0.03 |
| 1616 | ELSQLLKDIDGYGGIAL | 17 | 0.01  | 0.64 | 0.64 | 0.28  | 0.36 | -0.06 | 0.53 | -2   | 4.03 | 1805.33 | 0.61 | 0.34 | 0.03 |
| 1617 | LSQLLKDIDGYGGIALP | 17 | 0.05  | 0.62 | 0.62 | 0.39  | 0.29 | -0.24 | 0.47 | -1   | 4.21 | 1773.33 | 0.99 | 0.40 | 0.23 |
| 1618 | SQLLKDIDGYGGIALPE | 17 | -0.02 | 0.63 | 0.63 | -0.04 | 0.36 | 0.04  | 0.53 | -2   | 4.03 | 1789.28 | 0.99 | 0.39 | 0.11 |
| 1619 | QLLKDIDGYGGIALPEL | 17 | 0.02  | 0.63 | 0.63 | 0.24  | 0.36 | -0.08 | 0.47 | -2   | 4.03 | 1815.37 | 0.94 | 0.40 | 0.04 |
| 1620 | LLKDIDGYGGIALPELI | 17 | 0.11  | 0.63 | 0.63 | 0.71  | 0.29 | -0.2  | 0.35 | -2   | 4.03 | 1800.4  | 0.99 | 0.46 | 0.07 |
| 1621 | LKDIDGYGGIALPELIC | 17 | 0.08  | 0.64 | 0.64 | 0.63  | 0.29 | -0.15 | 0.35 | -2   | 4.03 | 1790.37 | 0.99 | 0.47 | 0.05 |
| 1622 | KDIDGYGGIALPELIC  | 17 | 0.04  | 0.64 | 0.64 | 0.36  | 0.29 | -0.07 | 0.41 | -2   | 4.03 | 1778.31 | 0.99 | 0.46 | 0.05 |
| 1623 | DIDGYGGIALPELIC   | 17 | 0.12  | 0.64 | 0.64 | 0.71  | 0.07 | -0.32 | 0.29 | -3   | 3.5  | 1781.33 | 0.86 | 0.52 | 0.03 |
| 1624 | IDGYGGIALPELIC    | 17 | 0.2   | 0.64 | 0.64 | 1.08  | 0.07 | -0.65 | 0.24 | -2   | 3.67 | 1813.42 | 0.97 | 0.53 | 0.05 |
| 1625 | DGYGGIALPELIC     | 17 | 0.13  | 0.6  | 0.6  | 0.62  | 0.16 | -0.57 | 0.29 | -1.5 | 4.36 | 1837.4  | 0.86 | 0.54 | 0.08 |
| 1626 | GYGGIALPELIC      | 17 | 0.16  | 0.58 | 0.58 | 0.79  | 0.16 | -0.77 | 0.29 | -0.5 | 5.25 | 1823.42 | 0.93 | 0.52 | 0.17 |
| 1627 | YGGIALPELIC       | 17 | 0.14  | 0.57 | 0.57 | 0.76  | 0.16 | -0.75 | 0.35 | -0.5 | 5.25 | 1853.44 | 0.97 | 0.49 | 0.13 |
| 1628 | GGIALPELIC        | 17 | 0.14  | 0.57 | 0.57 | 0.82  | 0.16 | -0.62 | 0.29 | -0.5 | 5.25 | 1747.32 | 0.98 | 0.37 | 0.58 |
| 1629 | GIALPELIC         | 17 | 0.14  | 0.57 | 0.57 | 0.76  | 0.16 | -0.75 | 0.35 | -0.5 | 5.25 | 1853.44 | 0.98 | 0.33 | 0.41 |
| 1630 | IALPELIC          | 17 | 0.08  | 0.58 | 0.58 | 0.58  | 0.16 | -0.58 | 0.41 | -1.5 | 4.36 | 1911.47 | 0.97 | 0.31 | 0.11 |
| 1631 | ALPELIC           | 17 | 0.03  | 0.57 | 0.57 | 0.28  | 0.16 | -0.49 | 0.47 | -1.5 | 4.36 | 1899.41 | 0.80 | 0.31 | 0.08 |
| 1632 | LPELIC            | 17 | -0.02 | 0.58 | 0.58 | -0.04 | 0.23 | -0.45 | 0.59 | -1.5 | 4.36 | 1956.47 | 0.98 | 0.33 | 0.03 |
| 1633 | PELIC             | 17 | -0.04 | 0.58 | 0.58 | -0.15 | 0.23 | -0.38 | 0.59 | -1.5 | 4.36 | 1914.38 | 0.87 | 0.29 | 0.03 |
| 1634 | ELICTMFHTSGYDTQAI | 17 | 0.01  | 0.6  | 0.6  | 0.21  | 0.23 | -0.48 | 0.59 | -1.5 | 4.36 | 1930.43 | 0.80 | 0.29 | 0.02 |
| 1635 | LICTMFHTSGYDTQAI  | 17 | 0.07  | 0.6  | 0.6  | 0.66  | 0.16 | -0.75 | 0.53 | -0.5 | 5.09 | 1900.45 | 0.93 | 0.37 | 0.14 |
| 1636 | ICTMFHTSGYDTQAI   | 17 | 0.01  | 0.61 | 0.61 | 0.23  | 0.23 | -0.46 | 0.59 | -1.5 | 4.36 | 1916.4  | 0.93 | 0.39 | 0.29 |
| 1637 | CTMFHTSGYDTQAI    | 17 | -0.07 | 0.61 | 0.61 | -0.24 | 0.23 | -0.35 | 0.71 | -1.5 | 4.36 | 1917.34 | 0.94 | 0.40 | 0.09 |
| 1638 | TMFHTSGYDTQAI     | 17 | -0.11 | 0.62 | 0.62 | -0.59 | 0.23 | -0.28 | 0.82 | -1.5 | 4.36 | 1928.31 | 0.93 | 0.37 | 0.07 |
| 1639 | MFHTSGYDTQAI      | 17 | -0.14 | 0.63 | 0.63 | -0.76 | 0.31 | -0.08 | 0.82 | -2.5 | 4.14 | 1956.32 | 0.93 | 0.31 | 0.04 |
| 1640 | FHTSGYDTQAI       | 17 | -0.17 | 0.61 | 0.61 | -0.92 | 0.31 | 0.02  | 0.88 | -2.5 | 4.14 | 1912.2  | 0.94 | 0.31 | 0.04 |
| 1641 | HTSGYDTQAI        | 17 | -0.22 | 0.6  | 0.6  | -1.12 | 0.31 | 0.14  | 0.94 | -2.5 | 4.14 | 1866.13 | 0.93 | 0.28 | 0.04 |
| 1642 | TSGYDTQAI         | 17 | -0.23 | 0.64 | 0.64 | -1.14 | 0.3  | 0.35  | 0.94 | -4   | 3.51 | 1858.1  | 0.93 | 0.24 | 0.04 |
| 1643 | SGYDTQAI          | 17 | -0.22 | 0.65 | 0.65 | -1.18 | 0.3  | 0.24  | 0.94 | -4   | 3.51 | 1920.17 | 0.93 | 0.31 | 0.04 |
| 1644 | GYDTQAI           | 17 | -0.19 | 0.66 | 0.66 | -1.15 | 0.3  | 0.22  | 0.88 | -4   | 3.51 | 1890.15 | 0.83 | 0.34 | 0.03 |
| 1645 | YDTQAI            | 17 | -0.17 | 0.65 | 0.65 | -0.91 | 0.3  | 0.11  | 0.88 | -4   | 3.51 | 1946.26 | 0.98 | 0.35 | 0.04 |
| 1646 | DTQAI             | 17 | -0.14 | 0.65 | 0.65 | -0.66 | 0.3  | 0.1   | 0.82 | -4   | 3.51 | 1930.26 | 0.94 | 0.40 | 0.08 |
| 1647 | TQAI              | 17 | -0.14 | 0.65 | 0.65 | -0.66 | 0.37 | -0.06 | 0.88 | -3   | 3.68 | 1943.31 | 0.98 | 0.41 | 0.07 |
| 1648 | QAI               | 17 | -0.08 | 0.66 | 0.66 | -0.36 | 0.37 | -0.15 | 0.82 | -3   | 3.68 | 1955.37 | 0.98 | 0.42 | 0.08 |
| 1649 | AIVENNE           | 17 | -0.06 | 0.65 | 0.65 | -0.2  | 0.3  | -0.14 | 0.76 | -3   | 3.68 | 1914.31 | 0.80 | 0.51 | 0.07 |
| 1650 | IVENNE            | 17 | -0.11 | 0.66 | 0.66 | -0.51 | 0.3  | -0.1  | 0.88 | -3   | 3.68 | 1957.34 | 0.94 | 0.47 | 0.05 |
| 1651 | VENNE             | 17 | -0.22 | 0.66 | 0.66 | -1.01 | 0.51 | 0.18  | 1    | -2   | 4.26 | 1972.35 | 0.99 | 0.42 | 0.04 |
| 1652 | ENNE              | 17 | -0.22 | 0.65 | 0.65 | -1.03 | 0.51 | 0.16  | 1    | -2   | 4.26 | 1986.38 | 0.61 | 0.42 | 0.10 |
| 1653 | NNESTE            | 17 | -0.16 | 0.64 | 0.64 | -0.88 | 0.44 | -0.21 | 1    | -1   | 4.54 | 2043.48 | 0.94 | 0.41 | 0.07 |
| 1654 | NESTE             | 17 | -0.12 | 0.63 | 0.63 | -0.52 | 0.44 | -0.28 | 0.88 | -1   | 4.54 | 2032.51 | 0.99 | 0.45 | 0.10 |
| 1655 | ESTE              | 17 | -0.15 | 0.63 | 0.63 | -0.55 | 0.65 | -0.12 | 0.88 | 0    | 6.45 | 2046.58 | 0.61 | 0.47 | 0.23 |
| 1656 | STEYGLFQISNKLWCK  | 17 | -0.12 | 0.62 | 0.62 | -0.39 | 0.58 | -0.28 | 0.88 | 1    | 8.51 | 2004.54 | 0.97 | 0.48 | 0.63 |
| 1657 | TEYGLFQISNKLWCKSS | 17 | -0.12 | 0.62 | 0.62 | -0.39 | 0.58 | -0.28 | 0.88 | 1    | 8.51 | 2004.54 | 0.97 | 0.55 | 0.13 |
| 1658 | EYGLFQISNKLWCKSSQ | 17 | -0.15 | 0.63 | 0.63 | -0.55 | 0.65 | -0.24 | 0.94 | 1    | 8.51 | 2031.57 | 0.61 | 0.56 | 0.33 |
| 1659 | YGLFQISNKLWCKSSQV | 17 | -0.09 | 0.63 | 0.63 | -0.1  | 0.58 | -0.51 | 0.88 | 2    | 9.25 | 2001.59 | 0.99 | 0.57 | 0.20 |
| 1660 | GLFQISNKLWCKSSQV  | 17 | -0.09 | 0.61 | 0.61 | -0.12 | 0.58 | -0.37 | 0.82 | 2    | 9.36 | 1935.53 | 0.98 | 0.57 | 0.91 |
| 1661 | LFQISNKLWCKSSQV   | 17 | -0.14 | 0.61 | 0.61 | -0.3  | 0.65 | -0.36 | 0.94 | 2    | 9.36 | 2006.61 | 0.94 | 0.55 | 0.23 |
| 1662 | FQISNKLWCKSSQV    | 17 | -0.19 | 0.61 | 0.61 | -0.57 | 0.65 | -0.24 | 1    | 2    | 9.36 | 1980.52 | 0.61 | 0.49 | 0.05 |

|      |                     |    |       |      |      |       |      |       |      |      |       |         |      |      |      |
|------|---------------------|----|-------|------|------|-------|------|-------|------|------|-------|---------|------|------|------|
| 1663 | QISNKLWCKSSQVPQSR   | 17 | -0.33 | 0.61 | 0.61 | -1    | 0.8  | 0.09  | 1.24 | 3    | 10.07 | 1989.53 | 0.99 | 0.46 | 0.05 |
| 1664 | ISNKLWCKSSQVPQSRN   | 17 | -0.32 | 0.61 | 0.61 | -1    | 0.72 | 0.09  | 1.24 | 3    | 10.07 | 1975.5  | 0.99 | 0.46 | 0.05 |
| 1665 | SNKLWCKSSQVPQSRNI   | 17 | -0.32 | 0.61 | 0.61 | -1    | 0.72 | 0.09  | 1.24 | 3    | 10.07 | 1975.5  | 0.99 | 0.40 | 0.09 |
| 1666 | NKLWCKSSQVPQSRNIC   | 17 | -0.31 | 0.62 | 0.62 | -0.81 | 0.72 | 0.01  | 1.18 | 3    | 9.53  | 1991.56 | 0.99 | 0.42 | 0.80 |
| 1667 | KLWCKSSQVPQSRNICD   | 17 | -0.31 | 0.62 | 0.62 | -0.81 | 0.72 | 0.18  | 1.12 | 2    | 8.98  | 1992.54 | 0.99 | 0.45 | 0.69 |
| 1668 | LWCKSSQVPQSRNICDI   | 17 | -0.2  | 0.62 | 0.62 | -0.31 | 0.51 | -0.11 | 1    | 1    | 8.38  | 1977.53 | 0.97 | 0.42 | 0.23 |
| 1669 | WCKSSQVPQSRNICDIS   | 17 | -0.25 | 0.62 | 0.62 | -0.58 | 0.51 | 0.02  | 1.06 | 1    | 8.38  | 1951.44 | 0.97 | 0.47 | 0.46 |
| 1670 | CKSSQVPQSRNICDISC   | 17 | -0.27 | 0.63 | 0.63 | -0.38 | 0.51 | 0.16  | 1    | 1    | 8.26  | 1868.36 | 0.86 | 0.44 | 0.71 |
| 1671 | KSSQVPQSRNICDISCD   | 17 | -0.31 | 0.64 | 0.64 | -0.74 | 0.51 | 0.39  | 1.06 | 0    | 6.25  | 1880.31 | 0.99 | 0.45 | 0.05 |
| 1672 | SSQVPQSRNICDISCDK   | 17 | -0.31 | 0.64 | 0.64 | -0.74 | 0.51 | 0.39  | 1.06 | 0    | 6.25  | 1880.31 | 0.99 | 0.43 | 0.06 |
| 1673 | SQVPQSRNICDISCDKF   | 17 | -0.26 | 0.65 | 0.65 | -0.52 | 0.51 | 0.23  | 1    | 0    | 6.25  | 1940.41 | 0.99 | 0.48 | 0.19 |
| 1674 | QVPQSRNICDISCDKFL   | 17 | -0.22 | 0.65 | 0.65 | -0.25 | 0.51 | 0.11  | 0.94 | 0    | 6.25  | 1966.5  | 0.99 | 0.51 | 0.36 |
| 1675 | VPQSRNICDISCDKFLD   | 17 | -0.22 | 0.65 | 0.65 | -0.25 | 0.43 | 0.27  | 0.88 | -1   | 4.43  | 1953.45 | 0.99 | 0.37 | 0.29 |
| 1676 | PQSRNICDISCDKFLDD   | 17 | -0.29 | 0.65 | 0.65 | -0.71 | 0.43 | 0.54  | 0.94 | -2   | 4.14  | 1969.4  | 0.87 | 0.33 | 0.19 |
| 1677 | QSRNICDISCDKFLDDD   | 17 | -0.33 | 0.68 | 0.68 | -0.82 | 0.43 | 0.71  | 1    | -3   | 3.98  | 1987.37 | 0.98 | 0.38 | 0.13 |
| 1678 | SRNICDISCDKFLDDDI   | 17 | -0.25 | 0.68 | 0.68 | -0.35 | 0.36 | 0.59  | 0.88 | -3   | 3.98  | 1972.4  | 0.99 | 0.42 | 0.17 |
| 1679 | RNICDISCDKFLDDDIT   | 17 | -0.24 | 0.68 | 0.68 | -0.34 | 0.36 | 0.55  | 0.88 | -3   | 3.98  | 1986.43 | 0.98 | 0.42 | 0.08 |
| 1680 | NICDISCDKFLDDDITD   | 17 | -0.18 | 0.68 | 0.68 | -0.28 | 0.22 | 0.55  | 0.71 | -5   | 3.57  | 1945.33 | 0.98 | 0.39 | 0.04 |
| 1681 | ICDISCDKFLDDDITDD   | 17 | -0.19 | 0.68 | 0.68 | -0.28 | 0.22 | 0.72  | 0.65 | -6   | 3.5   | 1946.31 | 0.99 | 0.37 | 0.03 |
| 1682 | CDISCDKFLDDDITDDI   | 17 | -0.19 | 0.68 | 0.68 | -0.28 | 0.22 | 0.72  | 0.65 | -6   | 3.5   | 1946.31 | 0.61 | 0.37 | 0.04 |
| 1683 | DISCDKFLDDDITDDIM   | 17 | -0.17 | 0.69 | 0.69 | -0.32 | 0.22 | 0.7   | 0.65 | -6   | 3.5   | 1974.37 | 0.61 | 0.35 | 0.03 |
| 1684 | ISCDKFLDDDITDDIMC   | 17 | -0.13 | 0.69 | 0.69 | 0.04  | 0.22 | 0.46  | 0.59 | -5   | 3.57  | 1962.42 | 0.99 | 0.35 | 0.13 |
| 1685 | SCDKFLDDDITDDIMCA   | 17 | -0.16 | 0.67 | 0.67 | -0.12 | 0.22 | 0.54  | 0.59 | -5   | 3.57  | 1920.33 | 0.99 | 0.35 | 0.09 |
| 1686 | CDKFLDDDITDDIMCAK   | 17 | -0.21 | 0.68 | 0.68 | -0.31 | 0.43 | 0.7   | 0.65 | -4   | 3.86  | 1961.43 | 0.61 | 0.37 | 0.03 |
| 1687 | DKFLDDDITDDIMCAKK   | 17 | -0.27 | 0.69 | 0.69 | -0.68 | 0.65 | 0.94  | 0.76 | -3   | 4.12  | 1986.47 | 0.61 | 0.40 | 0.12 |
| 1688 | KFLDDDITDDIMCAKKI   | 17 | -0.19 | 0.68 | 0.68 | -0.21 | 0.65 | 0.65  | 0.71 | -2   | 4.29  | 1984.55 | 0.99 | 0.49 | 0.06 |
| 1689 | FLDDDITDDIMCAKKIL   | 17 | -0.09 | 0.67 | 0.67 | 0.24  | 0.43 | 0.37  | 0.59 | -3   | 3.98  | 1969.54 | 0.61 | 0.48 | 0.11 |
| 1690 | LDDDITDDIMCAKKILD   | 17 | -0.17 | 0.68 | 0.68 | -0.13 | 0.43 | 0.69  | 0.65 | -4   | 3.86  | 1937.45 | 0.99 | 0.43 | 0.03 |
| 1691 | DDDITDDIMCAKKILDI   | 17 | -0.16 | 0.69 | 0.69 | -0.09 | 0.43 | 0.69  | 0.65 | -4   | 3.86  | 1937.45 | 0.86 | 0.43 | 0.05 |
| 1692 | DDITDDIMCAKKILDIK   | 17 | -0.18 | 0.68 | 0.68 | -0.11 | 0.65 | 0.69  | 0.71 | -2   | 4.29  | 1950.54 | 0.61 | 0.43 | 0.07 |
| 1693 | DITDDIMCAKKILDIKG   | 17 | -0.13 | 0.68 | 0.68 | 0.07  | 0.65 | 0.52  | 0.65 | -1   | 4.58  | 1892.51 | 0.61 | 0.38 | 0.15 |
| 1694 | ITDDIMCAKKILDIKGI   | 17 | -0.04 | 0.68 | 0.68 | 0.54  | 0.65 | 0.24  | 0.59 | 0    | 6.35  | 1890.59 | 0.99 | 0.36 | 0.40 |
| 1695 | TDDIMCAKKILDIKGID   | 17 | -0.13 | 0.68 | 0.68 | 0.07  | 0.65 | 0.52  | 0.65 | -1   | 4.58  | 1892.51 | 0.99 | 0.34 | 0.11 |
| 1696 | DDIMCAKKILDIKGIDY   | 17 | -0.12 | 0.69 | 0.69 | 0.04  | 0.65 | 0.41  | 0.65 | -1   | 4.58  | 1954.58 | 0.61 | 0.37 | 0.11 |
| 1697 | DIMCAKKILDIKGIDYWL  | 17 | -0.05 | 0.67 | 0.67 | 0.19  | 0.65 | 0.03  | 0.65 | 0    | 6.35  | 2025.71 | 0.86 | 0.44 | 0.75 |
| 1698 | IMCAKKILDIKGIDYWLA  | 17 | 0.02  | 0.66 | 0.66 | 0.62  | 0.65 | -0.25 | 0.59 | 1    | 8.48  | 2023.79 | 0.97 | 0.47 | 0.98 |
| 1699 | MCAKKILDIKGIDYWLAH  | 17 | -0.01 | 0.65 | 0.65 | 0.46  | 0.65 | -0.18 | 0.59 | 1    | 8.48  | 1981.7  | 0.93 | 0.46 | 0.98 |
| 1700 | CAKKILDIKGIDYWLAHAK | 17 | -0.05 | 0.6  | 0.6  | 0.16  | 0.73 | -0.13 | 0.65 | 1.5  | 8.48  | 1987.65 | 0.69 | 0.46 | 0.98 |
| 1701 | AKKILDIKGIDYWLAHAKI | 17 | -0.11 | 0.61 | 0.61 | -0.22 | 0.95 | 0.11  | 0.76 | 2.5  | 9.43  | 2012.69 | 0.94 | 0.46 | 0.97 |
| 1702 | KKILDIKGIDYWLAHAKIA | 17 | -0.11 | 0.61 | 0.61 | -0.22 | 0.95 | 0.11  | 0.76 | 2.5  | 9.43  | 2012.69 | 0.99 | 0.48 | 0.95 |
| 1703 | KILDIKGIDYWLAHAKIAL | 17 | -0.02 | 0.6  | 0.6  | 0.24  | 0.73 | -0.18 | 0.65 | 1.5  | 8.76  | 1997.68 | 0.99 | 0.44 | 0.79 |
| 1704 | ILDIKGIDYWLAHAKIALC | 17 | 0.05  | 0.59 | 0.59 | 0.61  | 0.52 | -0.41 | 0.53 | 0.5  | 7.06  | 1972.64 | 0.93 | 0.42 | 0.61 |
| 1705 | LDIKGIDYWLAHAKIALCT | 17 | 0     | 0.58 | 0.58 | 0.31  | 0.52 | -0.33 | 0.59 | 0.5  | 7.06  | 1960.58 | 0.93 | 0.43 | 0.29 |
| 1706 | DIKGIDYWLAHAKALCTE  | 17 | -0.07 | 0.59 | 0.59 | -0.12 | 0.59 | -0.05 | 0.65 | -0.5 | 5.39  | 1976.53 | 0.94 | 0.46 | 0.13 |
| 1707 | IKGIDYWLAHAKALCTEKL | 17 | -0.09 | 0.59 | 0.59 | -0.15 | 0.81 | -0.05 | 0.71 | 1.5  | 8.48  | 1989.62 | 0.97 | 0.47 | 0.73 |
| 1708 | KGIDYWLAHAKALCTEKL  | 17 | -0.11 | 0.58 | 0.58 | -0.19 | 0.81 | -0.05 | 0.71 | 1.5  | 8.48  | 1989.62 | 0.98 | 0.47 | 0.78 |
| 1709 | GIDYWLAHAKALCTEKL   | 17 | -0.08 | 0.58 | 0.58 | -0.16 | 0.67 | -0.05 | 0.65 | -0.5 | 5.46  | 1990.56 | 0.95 | 0.44 | 0.10 |
| 1710 | IDYWLAHAKALCTEKL    | 17 | -0.13 | 0.58 | 0.58 | -0.35 | 0.74 | -0.04 | 0.76 | -0.5 | 5.46  | 2061.64 | 0.99 | 0.39 | 0.11 |
| 1711 | DYWLAHAKALCTEKL     | 17 | -0.15 | 0.57 | 0.57 | -0.66 | 0.74 | -0.13 | 0.82 | -0.5 | 5.46  | 2134.69 | 0.86 | 0.39 | 0.55 |
| 1712 | YWLAKALCTEKL        | 17 | -0.08 | 0.55 | 0.55 | -0.24 | 0.74 | -0.41 | 0.76 | 0.5  | 7.06  | 2132.77 | 0.99 | 0.38 | 0.91 |
| 1713 | WLAKALCTEKL         | 17 | -0.07 | 0.55 | 0.55 | -0.01 | 0.74 | -0.34 | 0.71 | 0.5  | 7.04  | 2072.73 | 0.97 | 0.33 | 0.90 |
| 1714 | LAKALCTEKL          | 17 | -0.13 | 0.56 | 0.56 | -0.16 | 0.81 | 0.04  | 0.71 | -0.5 | 5.51  | 2015.63 | 0.93 | 0.34 | 0.51 |
| 1715 | AHKALCTEKL          | 17 | -0.23 | 0.57 | 0.57 | -0.62 | 1.03 | 0.32  | 0.82 | 0.5  | 7.04  | 2030.64 | 0.86 | 0.27 | 0.32 |
| 1716 | HKALCTEKL           | 17 | -0.21 | 0.57 | 0.57 | -0.5  | 1.03 | 0.25  | 0.82 | 0.5  | 7.04  | 2072.73 | 0.98 | 0.23 | 0.77 |
| 1717 | MRFFVPLFLVGILFPAIL  | 18 | 0.33  | 0.62 | 0.62 | 2.19  | 0.14 | -1.26 | 0.22 | 1    | 10.11 | 2093.97 | 0.93 | 0.66 | 0.95 |
| 1718 | RFVPLFLVGILFPAILA   | 18 | 0.33  | 0.6  | 0.6  | 2.18  | 0.14 | -1.21 | 0.22 | 1    | 10.11 | 2033.85 | 0.93 | 0.65 | 0.90 |
| 1719 | FFVPLFLVGILFPAILAK  | 18 | 0.36  | 0.6  | 0.6  | 2.22  | 0.2  | -1.21 | 0.11 | 1    | 9.11  | 2005.84 | 0.94 | 0.71 | 0.99 |
| 1720 | FVPLFLVGILFPAILAKQ  | 18 | 0.29  | 0.6  | 0.6  | 1.87  | 0.27 | -1.06 | 0.22 | 1    | 9.11  | 1986.8  | 0.94 | 0.65 | 0.98 |
| 1721 | VPLFLVGILFPAILAKQF  | 18 | 0.29  | 0.6  | 0.6  | 1.87  | 0.27 | -1.06 | 0.22 | 1    | 9.11  | 1986.8  | 0.98 | 0.62 | 0.98 |
| 1722 | PLFLVGILFPAILAKQFT  | 18 | 0.25  | 0.59 | 0.59 | 1.59  | 0.27 | -1    | 0.28 | 1    | 9.11  | 1988.77 | 0.98 | 0.56 | 0.89 |
| 1723 | LFLVGILFPAILAKQFTK  | 18 | 0.19  | 0.61 | 0.61 | 1.47  | 0.48 | -0.83 | 0.39 | 2    | 10.02 | 2019.83 | 0.98 | 0.55 | 0.95 |
| 1724 | FLVGILFPAILAKQFTKC  | 18 | 0.17  | 0.61 | 0.61 | 1.39  | 0.48 | -0.79 | 0.39 | 2    | 9.36  | 2009.8  | 0.94 | 0.55 | 0.98 |
| 1725 | LVGILFPAILAKQFTKCE  | 18 | 0.1   | 0.61 | 0.61 | 1.04  | 0.55 | -0.48 | 0.44 | 1    | 8.54  | 1991.74 | 0.93 | 0.50 | 0.89 |
| 1726 | VGILFPAILAKQFTKCEL  | 18 | 0.1   | 0.61 | 0.61 | 1.04  | 0.55 | -0.48 | 0.44 | 1    | 8.54  | 1991.74 | 0.93 | 0.49 | 0.96 |

|      |                    |    |       |      |      |       |      |       |      |      |       |         |      |      |      |
|------|--------------------|----|-------|------|------|-------|------|-------|------|------|-------|---------|------|------|------|
| 1727 | GILFPAILAKQFTKCELS | 18 | 0.05  | 0.6  | 0.6  | 0.77  | 0.55 | -0.38 | 0.5  | 1    | 8.54  | 1979.68 | 0.83 | 0.51 | 0.97 |
| 1728 | ILFPAILAKQFTKCELSQ | 18 | 0.01  | 0.6  | 0.6  | 0.59  | 0.62 | -0.37 | 0.61 | 1    | 8.54  | 2050.76 | 0.93 | 0.53 | 0.63 |
| 1729 | LFPAILAKQFTKCELSQL | 18 | -0.01 | 0.59 | 0.59 | 0.56  | 0.62 | -0.37 | 0.61 | 1    | 8.54  | 2050.76 | 0.93 | 0.49 | 0.37 |
| 1730 | FPAILAKQFTKCELSQLL | 18 | -0.01 | 0.59 | 0.59 | 0.56  | 0.62 | -0.37 | 0.61 | 1    | 8.54  | 2050.76 | 0.94 | 0.46 | 0.85 |
| 1731 | PAILAKQFTKCELSQLLK | 18 | -0.1  | 0.59 | 0.59 | 0.18  | 0.82 | -0.07 | 0.72 | 2    | 9.25  | 2031.76 | 0.93 | 0.47 | 0.85 |
| 1732 | AILAKQFTKCELSQLLKD | 18 | -0.14 | 0.62 | 0.62 | 0.08  | 0.82 | 0.1   | 0.78 | 1    | 8.51  | 2049.73 | 0.94 | 0.41 | 0.74 |
| 1733 | ILAKQFTKCELSQLLKDI | 18 | -0.11 | 0.63 | 0.63 | 0.23  | 0.82 | 0.03  | 0.78 | 1    | 8.51  | 2091.82 | 0.99 | 0.41 | 0.55 |
| 1734 | LAKQFTKCELSQLLKDID | 18 | -0.19 | 0.63 | 0.63 | -0.22 | 0.82 | 0.29  | 0.83 | 0    | 6.43  | 2093.74 | 0.99 | 0.39 | 0.68 |
| 1735 | AKQFTKCELSQLLKDIDG | 18 | -0.21 | 0.64 | 0.64 | -0.45 | 0.82 | 0.39  | 0.83 | 0    | 6.43  | 2037.63 | 0.61 | 0.31 | 0.07 |
| 1736 | KQFTKCELSQLLKDIDGY | 18 | -0.22 | 0.65 | 0.65 | -0.62 | 0.82 | 0.29  | 0.89 | 0    | 6.43  | 2129.73 | 0.99 | 0.31 | 0.04 |
| 1737 | QFTKCELSQLLKDIDGYG | 18 | -0.15 | 0.65 | 0.65 | -0.43 | 0.62 | 0.13  | 0.78 | -1   | 4.56  | 2058.61 | 0.94 | 0.31 | 0.04 |
| 1738 | FTKCELSQLLKDIDGYGG | 18 | -0.11 | 0.65 | 0.65 | -0.26 | 0.55 | 0.12  | 0.67 | -1   | 4.56  | 1987.53 | 0.61 | 0.29 | 0.18 |
| 1739 | TKCELSQLLKDIDGYGGI | 18 | -0.1  | 0.65 | 0.65 | -0.16 | 0.55 | 0.16  | 0.67 | -1   | 4.56  | 1953.52 | 0.99 | 0.33 | 0.03 |
| 1740 | KCELSQLLKDIDGYGGIA | 18 | -0.08 | 0.65 | 0.65 | -0.02 | 0.55 | 0.15  | 0.61 | -1   | 4.56  | 1923.49 | 0.99 | 0.29 | 0.10 |
| 1741 | CELSQLLKDIDGYGGIAL | 18 | 0.01  | 0.64 | 0.64 | 0.41  | 0.34 | -0.12 | 0.5  | -2   | 4.03  | 1908.48 | 0.61 | 0.29 | 0.03 |
| 1742 | ELSQLLKDIDGYGGIALP | 18 | 0.01  | 0.62 | 0.62 | 0.18  | 0.34 | -0.06 | 0.5  | -2   | 4.03  | 1902.46 | 0.61 | 0.35 | 0.03 |
| 1743 | LSQLLKDIDGYGGIALPE | 18 | 0.01  | 0.62 | 0.62 | 0.18  | 0.34 | -0.06 | 0.5  | -2   | 4.03  | 1902.46 | 0.99 | 0.36 | 0.06 |
| 1744 | SQLLKDIDGYGGIALPEL | 18 | 0.01  | 0.62 | 0.62 | 0.18  | 0.34 | -0.06 | 0.5  | -2   | 4.03  | 1902.46 | 0.99 | 0.35 | 0.04 |
| 1745 | QLLKDIDGYGGIALPELI | 18 | 0.06  | 0.63 | 0.63 | 0.47  | 0.34 | -0.18 | 0.44 | -2   | 4.03  | 1928.55 | 0.94 | 0.34 | 0.03 |
| 1746 | LLKDIDGYGGIALPELIC | 18 | 0.1   | 0.63 | 0.63 | 0.81  | 0.27 | -0.24 | 0.33 | -2   | 4.03  | 1903.55 | 0.97 | 0.42 | 0.17 |
| 1747 | LKDIDGYGGIALPELIC  | 18 | 0.06  | 0.63 | 0.63 | 0.56  | 0.27 | -0.17 | 0.39 | -2   | 4.03  | 1891.49 | 0.99 | 0.41 | 0.04 |
| 1748 | KDIDGYGGIALPELICM  | 18 | 0.05  | 0.64 | 0.64 | 0.45  | 0.27 | -0.14 | 0.39 | -2   | 4.03  | 1909.52 | 0.97 | 0.42 | 0.06 |
| 1749 | DIDGYGGIALPELICTM  | 18 | 0.14  | 0.64 | 0.64 | 0.82  | 0.07 | -0.44 | 0.28 | -3   | 3.5   | 1928.52 | 0.86 | 0.46 | 0.04 |
| 1750 | IDGYGGIALPELICTMFH | 18 | 0.16  | 0.6  | 0.6  | 0.84  | 0.15 | -0.64 | 0.28 | -1.5 | 4.36  | 1950.58 | 0.97 | 0.52 | 0.07 |
| 1751 | DGYGGIALPELICTMFHT | 18 | 0.11  | 0.59 | 0.59 | 0.55  | 0.15 | -0.56 | 0.33 | -1.5 | 4.36  | 1938.52 | 0.86 | 0.52 | 0.06 |
| 1752 | GYGGIALPELICTMFHST | 18 | 0.14  | 0.58 | 0.58 | 0.7   | 0.15 | -0.71 | 0.33 | -0.5 | 5.25  | 1910.51 | 0.93 | 0.44 | 0.38 |
| 1753 | YGGIALPELICTMFHSTG | 18 | 0.14  | 0.58 | 0.58 | 0.7   | 0.15 | -0.71 | 0.33 | -0.5 | 5.25  | 1910.51 | 0.97 | 0.37 | 0.13 |
| 1754 | GGIALPELICTMFHSTGY | 18 | 0.14  | 0.58 | 0.58 | 0.7   | 0.15 | -0.71 | 0.33 | -0.5 | 5.25  | 1910.51 | 0.98 | 0.33 | 0.41 |
| 1755 | GIALPELICTMFHSTGYD | 18 | 0.09  | 0.58 | 0.58 | 0.53  | 0.15 | -0.54 | 0.39 | -1.5 | 4.36  | 1968.54 | 0.98 | 0.33 | 0.22 |
| 1756 | IALPELICTMFHSTGYDT | 18 | 0.07  | 0.58 | 0.58 | 0.51  | 0.15 | -0.57 | 0.44 | -1.5 | 4.36  | 2012.59 | 0.93 | 0.30 | 0.08 |
| 1757 | ALPELICTMFHSTGYDTQ | 18 | -0.01 | 0.58 | 0.58 | 0.07  | 0.22 | -0.46 | 0.56 | -1.5 | 4.36  | 2027.56 | 0.80 | 0.31 | 0.06 |
| 1758 | LPELICTMFHSTGYDTQA | 18 | -0.01 | 0.58 | 0.58 | 0.07  | 0.22 | -0.46 | 0.56 | -1.5 | 4.36  | 2027.56 | 0.93 | 0.32 | 0.02 |
| 1759 | PELICTMFHSTGYDTQAI | 18 | 0     | 0.58 | 0.58 | 0.11  | 0.22 | -0.46 | 0.56 | -1.5 | 4.36  | 2027.56 | 0.87 | 0.29 | 0.03 |
| 1760 | ELICTMFHSTGYDTQAI  | 18 | 0.04  | 0.6  | 0.6  | 0.43  | 0.22 | -0.54 | 0.56 | -1.5 | 4.36  | 2029.58 | 0.80 | 0.33 | 0.02 |
| 1761 | LICTMFHSTGYDTQAI   | 18 | 0.04  | 0.6  | 0.6  | 0.43  | 0.22 | -0.54 | 0.56 | -1.5 | 4.36  | 2029.58 | 0.93 | 0.39 | 0.22 |
| 1762 | ICTMFHSTGYDTQAI    | 18 | -0.03 | 0.62 | 0.62 | 0.02  | 0.22 | -0.43 | 0.67 | -1.5 | 4.36  | 2030.52 | 0.93 | 0.42 | 0.18 |
| 1763 | CTMFHSTGYDTQAI     | 18 | -0.11 | 0.62 | 0.62 | -0.42 | 0.22 | -0.32 | 0.78 | -1.5 | 4.36  | 2031.46 | 0.94 | 0.39 | 0.08 |
| 1764 | TMFHTSGYDTQAI      | 18 | -0.14 | 0.62 | 0.62 | -0.76 | 0.29 | -0.09 | 0.83 | -2.5 | 4.14  | 2057.44 | 0.93 | 0.33 | 0.06 |
| 1765 | MFHTSGYDTQAI       | 18 | -0.15 | 0.62 | 0.62 | -0.76 | 0.29 | -0.06 | 0.83 | -2.5 | 4.14  | 2043.41 | 0.93 | 0.32 | 0.04 |
| 1766 | FHTSGYDTQAI        | 18 | -0.17 | 0.61 | 0.61 | -0.91 | 0.29 | -0.01 | 0.89 | -2.5 | 4.14  | 2013.32 | 0.94 | 0.34 | 0.04 |
| 1767 | HTSGYDTQAI         | 18 | -0.24 | 0.61 | 0.61 | -1.26 | 0.36 | 0.3   | 0.94 | -3.5 | 4     | 1995.26 | 0.93 | 0.29 | 0.04 |
| 1768 | TSGYDTQAI          | 18 | -0.22 | 0.65 | 0.65 | -1.15 | 0.28 | 0.2   | 0.94 | -4   | 3.51  | 2021.29 | 0.93 | 0.25 | 0.04 |
| 1769 | SGYDTQAI           | 18 | -0.2  | 0.66 | 0.66 | -1.13 | 0.28 | 0.22  | 0.89 | -4   | 3.51  | 1977.24 | 0.93 | 0.35 | 0.04 |
| 1770 | GYDTQAI            | 18 | -0.15 | 0.66 | 0.66 | -0.88 | 0.28 | 0.11  | 0.83 | -4   | 3.51  | 2003.33 | 0.83 | 0.33 | 0.05 |
| 1771 | YDTQAI             | 18 | -0.13 | 0.66 | 0.66 | -0.7  | 0.28 | -0.03 | 0.83 | -4   | 3.51  | 2093.45 | 0.98 | 0.38 | 0.05 |
| 1772 | DTQAI              | 18 | -0.17 | 0.66 | 0.66 | -0.82 | 0.35 | 0.11  | 0.89 | -4   | 3.51  | 2058.41 | 0.94 | 0.37 | 0.08 |
| 1773 | TQAI               | 18 | -0.09 | 0.65 | 0.65 | -0.38 | 0.35 | -0.16 | 0.83 | -3   | 3.68  | 2056.49 | 0.98 | 0.41 | 0.08 |
| 1774 | QAI                | 18 | -0.09 | 0.65 | 0.65 | -0.38 | 0.35 | -0.12 | 0.83 | -3   | 3.68  | 2042.46 | 0.98 | 0.43 | 0.07 |
| 1775 | AIV                | 18 | -0.09 | 0.66 | 0.66 | -0.38 | 0.28 | -0.12 | 0.83 | -3   | 3.68  | 2028.43 | 0.80 | 0.47 | 0.04 |
| 1776 | IV                 | 18 | -0.16 | 0.67 | 0.67 | -0.7  | 0.49 | 0.07  | 0.94 | -2   | 4.26  | 2085.53 | 0.94 | 0.42 | 0.04 |
| 1777 | V                  | 18 | -0.18 | 0.66 | 0.66 | -0.74 | 0.49 | 0.07  | 0.94 | -2   | 4.26  | 2085.53 | 0.98 | 0.41 | 0.07 |
| 1778 | EN                 | 18 | -0.18 | 0.64 | 0.64 | -1.02 | 0.49 | -0.03 | 1    | -2   | 4.26  | 2172.61 | 0.61 | 0.38 | 0.10 |
| 1779 | NN                 | 18 | -0.15 | 0.64 | 0.64 | -0.69 | 0.41 | -0.26 | 0.94 | -1   | 4.54  | 2146.63 | 0.87 | 0.40 | 0.12 |
| 1780 | NE                 | 18 | -0.17 | 0.64 | 0.64 | -0.71 | 0.62 | -0.1  | 0.94 | 0    | 6.45  | 2160.7  | 0.99 | 0.40 | 0.19 |
| 1781 | EST                | 18 | -0.15 | 0.62 | 0.62 | -0.56 | 0.62 | -0.09 | 0.89 | 0    | 6.45  | 2133.67 | 0.61 | 0.46 | 0.10 |
| 1782 | STE                | 18 | -0.13 | 0.62 | 0.62 | -0.41 | 0.55 | -0.24 | 0.89 | 1    | 8.51  | 2091.63 | 0.97 | 0.50 | 0.24 |
| 1783 | TE                 | 18 | -0.16 | 0.62 | 0.62 | -0.56 | 0.62 | -0.25 | 0.94 | 1    | 8.51  | 2132.69 | 0.97 | 0.53 | 0.06 |
| 1784 | EY                 | 18 | -0.12 | 0.63 | 0.63 | -0.29 | 0.62 | -0.31 | 0.89 | 1    | 8.51  | 2130.72 | 0.61 | 0.54 | 0.09 |
| 1785 | YGL                | 18 | -0.09 | 0.62 | 0.62 | -0.18 | 0.55 | -0.48 | 0.83 | 2    | 9.25  | 2098.72 | 0.99 | 0.54 | 0.28 |
| 1786 | GL                 | 18 | -0.12 | 0.61 | 0.61 | -0.31 | 0.62 | -0.34 | 0.89 | 2    | 9.36  | 2063.68 | 0.98 | 0.53 | 0.78 |
| 1787 | LF                 | 18 | -0.15 | 0.61 | 0.61 | -0.33 | 0.62 | -0.32 | 0.94 | 2    | 9.36  | 2093.7  | 0.94 | 0.49 | 0.10 |
| 1788 | FQ                 | 18 | -0.28 | 0.61 | 0.61 | -0.79 | 0.75 | -0.06 | 1.17 | 3    | 10.07 | 2136.72 | 0.61 | 0.43 | 0.07 |
| 1789 | QIS                | 18 | -0.34 | 0.62 | 0.62 | -1.14 | 0.75 | 0.09  | 1.28 | 3    | 10.07 | 2103.65 | 0.99 | 0.44 | 0.04 |
| 1790 | IS                 | 18 | -0.27 | 0.62 | 0.62 | -0.69 | 0.68 | -0.02 | 1.17 | 3    | 10.07 | 2088.68 | 0.99 | 0.42 | 0.07 |

|      |                      |    |       |      |      |       |      |       |      |      |       |         |      |      |      |
|------|----------------------|----|-------|------|------|-------|------|-------|------|------|-------|---------|------|------|------|
| 1791 | SNKLWCKSSQVPQSRNIC   | 18 | -0.3  | 0.61 | 0.61 | -0.81 | 0.68 | 0.03  | 1.17 | 3    | 9.53  | 2078.65 | 0.99 | 0.37 | 0.58 |
| 1792 | NKLWCKSSQVPQSRNICD   | 18 | -0.33 | 0.63 | 0.63 | -0.96 | 0.68 | 0.18  | 1.17 | 2    | 8.98  | 2106.66 | 0.99 | 0.42 | 0.42 |
| 1793 | KLWCKSSQVPQSRNICDI   | 18 | -0.25 | 0.62 | 0.62 | -0.51 | 0.68 | 0.07  | 1.06 | 2    | 8.98  | 2105.72 | 0.99 | 0.43 | 0.39 |
| 1794 | LWCKSSQVPQSRNICDIS   | 18 | -0.21 | 0.62 | 0.62 | -0.34 | 0.48 | -0.08 | 1    | 1    | 8.38  | 2064.62 | 0.97 | 0.46 | 0.43 |
| 1795 | WCKSSQVPQSRNICDISC   | 18 | -0.23 | 0.62 | 0.62 | -0.41 | 0.48 | -0.04 | 1    | 1    | 8.26  | 2054.59 | 0.97 | 0.43 | 0.81 |
| 1796 | CKSSQVPQSRNICDISCD   | 18 | -0.29 | 0.64 | 0.64 | -0.56 | 0.48 | 0.32  | 1    | 0    | 6.23  | 1983.46 | 0.86 | 0.42 | 0.13 |
| 1797 | KSSQVPQSRNICDISCDK   | 18 | -0.36 | 0.64 | 0.64 | -0.91 | 0.68 | 0.54  | 1.11 | 1    | 8.36  | 2008.5  | 0.99 | 0.43 | 0.06 |
| 1798 | SSQVPQSRNICDISCDKF   | 18 | -0.26 | 0.64 | 0.64 | -0.54 | 0.48 | 0.23  | 1    | 0    | 6.25  | 2027.5  | 0.99 | 0.47 | 0.13 |
| 1799 | SQVPQSRNICDISCDKFL   | 18 | -0.22 | 0.64 | 0.64 | -0.28 | 0.48 | 0.12  | 0.94 | 0    | 6.25  | 2053.59 | 0.99 | 0.49 | 0.47 |
| 1800 | QVPQSRNICDISCDKFLD   | 18 | -0.24 | 0.65 | 0.65 | -0.43 | 0.48 | 0.27  | 0.94 | -1   | 4.43  | 2081.6  | 0.99 | 0.37 | 0.22 |
| 1801 | VPQSRNICDISCDKFLDD   | 18 | -0.25 | 0.66 | 0.66 | -0.43 | 0.41 | 0.42  | 0.89 | -2   | 4.14  | 2068.55 | 0.98 | 0.34 | 0.14 |
| 1802 | PQSRNICDISCDKFLDDD   | 18 | -0.32 | 0.66 | 0.66 | -0.86 | 0.41 | 0.67  | 0.94 | -3   | 3.98  | 2084.5  | 0.87 | 0.33 | 0.11 |
| 1803 | QSRNICDISCDKFLDDDI   | 18 | -0.27 | 0.68 | 0.68 | -0.52 | 0.41 | 0.57  | 0.94 | -3   | 3.98  | 2100.55 | 0.98 | 0.38 | 0.15 |
| 1804 | SRNICDISCDKFLDDDDI   | 18 | -0.24 | 0.67 | 0.67 | -0.37 | 0.34 | 0.54  | 0.89 | -3   | 3.98  | 2073.52 | 0.98 | 0.40 | 0.08 |
| 1805 | RNICDISCDKFLDDDDITD  | 18 | -0.27 | 0.68 | 0.68 | -0.52 | 0.34 | 0.69  | 0.89 | -4   | 3.86  | 2101.53 | 0.98 | 0.37 | 0.06 |
| 1806 | NICDISCDKFLDDDDITDD  | 18 | -0.21 | 0.69 | 0.69 | -0.46 | 0.2  | 0.69  | 0.72 | -6   | 3.5   | 2060.43 | 0.99 | 0.37 | 0.03 |
| 1807 | ICDISCDKFLDDDDITDDI  | 18 | -0.14 | 0.68 | 0.68 | -0.02 | 0.2  | 0.58  | 0.61 | -6   | 3.5   | 2059.49 | 0.99 | 0.35 | 0.07 |
| 1808 | CDISCDKFLDDDDITDDIM  | 18 | -0.16 | 0.69 | 0.69 | -0.16 | 0.2  | 0.61  | 0.61 | -6   | 3.5   | 2077.52 | 0.61 | 0.33 | 0.03 |
| 1809 | DISCDKFLDDDDITDDIMC  | 18 | -0.16 | 0.69 | 0.69 | -0.16 | 0.2  | 0.61  | 0.61 | -6   | 3.5   | 2077.52 | 0.61 | 0.34 | 0.06 |
| 1810 | ISCDKFLDDDDITDDIMCA  | 18 | -0.11 | 0.68 | 0.68 | -0.13 | 0.2  | 0.41  | 0.56 | -5   | 3.57  | 2033.51 | 0.99 | 0.34 | 0.06 |
| 1811 | SCDKFLDDDDITDDIMCAK  | 18 | -0.21 | 0.67 | 0.67 | -0.33 | 0.41 | 0.68  | 0.67 | -4   | 3.86  | 2048.52 | 0.99 | 0.38 | 0.14 |
| 1812 | CDKFLDDDDITDDIMCAKK  | 18 | -0.26 | 0.68 | 0.68 | -0.51 | 0.61 | 0.83  | 0.72 | -3   | 4.12  | 2089.62 | 0.61 | 0.39 | 0.16 |
| 1813 | DKFLDDDDITDDIMCAKKI  | 18 | -0.22 | 0.69 | 0.69 | -0.39 | 0.61 | 0.78  | 0.72 | -3   | 4.12  | 2099.65 | 0.61 | 0.38 | 0.05 |
| 1814 | KFLDDDDITDDIMCAKKIL  | 18 | -0.15 | 0.67 | 0.67 | 0.01  | 0.61 | 0.52  | 0.67 | -2   | 4.29  | 2097.73 | 0.99 | 0.53 | 0.16 |
| 1815 | FLDDDDITDDIMCAKKILD  | 18 | -0.13 | 0.68 | 0.68 | 0.03  | 0.41 | 0.52  | 0.61 | -4   | 3.86  | 2084.64 | 0.99 | 0.49 | 0.04 |
| 1816 | LDDDDITDDIMCAKKILDI  | 18 | -0.12 | 0.68 | 0.68 | 0.13  | 0.41 | 0.56  | 0.61 | -4   | 3.86  | 2050.63 | 0.99 | 0.43 | 0.04 |
| 1817 | DDDDITDDIMCAKKILDIKI | 18 | -0.21 | 0.69 | 0.69 | -0.3  | 0.61 | 0.82  | 0.72 | -3   | 4.12  | 2065.64 | 0.61 | 0.43 | 0.05 |
| 1818 | DDITDDIMCAKKILDIKIG  | 18 | -0.16 | 0.68 | 0.68 | -0.13 | 0.61 | 0.66  | 0.67 | -2   | 4.29  | 2007.61 | 0.61 | 0.40 | 0.08 |
| 1819 | DITDDIMCAKKILDIKIGI  | 18 | -0.08 | 0.68 | 0.68 | 0.32  | 0.61 | 0.39  | 0.61 | -1   | 4.58  | 2005.69 | 0.61 | 0.38 | 0.18 |
| 1820 | ITDDIMCAKKILDIKIGID  | 18 | -0.08 | 0.68 | 0.68 | 0.32  | 0.61 | 0.39  | 0.61 | -1   | 4.58  | 2005.69 | 0.99 | 0.36 | 0.17 |
| 1821 | TDDIMCAKKILDIKIGIDY  | 18 | -0.12 | 0.68 | 0.68 | -0.01 | 0.61 | 0.36  | 0.67 | -1   | 4.58  | 2055.7  | 0.99 | 0.37 | 0.05 |
| 1822 | DDIMCAKKILDIKIGIDYW  | 18 | -0.09 | 0.68 | 0.68 | -0.02 | 0.61 | 0.19  | 0.67 | -1   | 4.58  | 2140.81 | 0.86 | 0.45 | 0.12 |
| 1823 | DIMCAKKILDIKIGIDYWL  | 18 | -0.02 | 0.67 | 0.67 | 0.39  | 0.61 | -0.07 | 0.61 | 0    | 6.35  | 2138.89 | 0.94 | 0.44 | 0.79 |
| 1824 | IMCAKKILDIKIGIDYWLA  | 18 | 0.03  | 0.65 | 0.65 | 0.68  | 0.61 | -0.27 | 0.56 | 1    | 8.48  | 2094.88 | 0.93 | 0.44 | 0.97 |
| 1825 | MCAKKILDIKIGIDYWLAH  | 18 | -0.03 | 0.61 | 0.61 | 0.26  | 0.69 | -0.19 | 0.61 | 1.5  | 8.48  | 2118.86 | 0.93 | 0.45 | 0.98 |
| 1826 | CAKKILDIKIGIDYWLAHK  | 18 | -0.11 | 0.61 | 0.61 | -0.07 | 0.9  | 0.04  | 0.72 | 2.5  | 9.1   | 2115.84 | 0.69 | 0.46 | 0.98 |
| 1827 | AKKILDIKIGIDYWLAHKA  | 18 | -0.09 | 0.6  | 0.6  | -0.11 | 0.9  | 0.07  | 0.72 | 2.5  | 9.43  | 2083.78 | 0.80 | 0.52 | 0.98 |
| 1828 | KKILDIKIGIDYWLAHKAL  | 18 | -0.08 | 0.6  | 0.6  | 0.01  | 0.9  | 0     | 0.72 | 2.5  | 9.43  | 2125.87 | 0.98 | 0.48 | 0.92 |
| 1829 | KILDIKIGIDYWLAHKALC  | 18 | -0.02 | 0.6  | 0.6  | 0.36  | 0.69 | -0.22 | 0.61 | 1.5  | 8.48  | 2100.83 | 0.98 | 0.41 | 0.87 |
| 1830 | LDIKIGIDYWLAHKALCT   | 18 | 0.04  | 0.59 | 0.59 | 0.54  | 0.49 | -0.41 | 0.56 | 0.5  | 7.06  | 2073.76 | 0.93 | 0.43 | 0.30 |
| 1831 | LDIKIGIDYWLAHKALCTE  | 18 | -0.04 | 0.59 | 0.59 | 0.09  | 0.56 | -0.14 | 0.61 | -0.5 | 5.39  | 2089.71 | 0.93 | 0.41 | 0.08 |
| 1832 | DIKIGIDYWLAHKALCTEK  | 18 | -0.13 | 0.6  | 0.6  | -0.33 | 0.76 | 0.12  | 0.72 | 0.5  | 7.06  | 2104.72 | 0.94 | 0.46 | 0.30 |
| 1833 | IGIDYWLAHKALCTEKL    | 18 | -0.06 | 0.59 | 0.59 | 0.07  | 0.76 | -0.14 | 0.67 | 1.5  | 8.48  | 2102.8  | 0.98 | 0.47 | 0.75 |
| 1834 | KGIDYWLAHKALCTEKLE   | 18 | -0.14 | 0.58 | 0.58 | -0.37 | 0.83 | 0.12  | 0.72 | 0.5  | 7.06  | 2118.75 | 0.98 | 0.47 | 0.10 |
| 1835 | GIDYWLAHKALCTEKLEQ   | 18 | -0.11 | 0.58 | 0.58 | -0.35 | 0.7  | -0.03 | 0.72 | -0.5 | 5.46  | 2118.71 | 0.83 | 0.42 | 0.06 |
| 1836 | IDYWLAHKALCTEKLEQW   | 18 | -0.1  | 0.57 | 0.57 | -0.38 | 0.7  | -0.22 | 0.78 | -0.5 | 5.46  | 2247.87 | 0.99 | 0.42 | 0.25 |
| 1837 | DYWLAHKALCTEKLEQWL   | 18 | -0.11 | 0.56 | 0.56 | -0.42 | 0.7  | -0.22 | 0.78 | -0.5 | 5.46  | 2247.87 | 0.86 | 0.41 | 0.74 |
| 1838 | YWLAHKALCTEKLEQWLC   | 18 | -0.07 | 0.56 | 0.56 | -0.08 | 0.7  | -0.44 | 0.72 | 0.5  | 7.03  | 2235.92 | 0.97 | 0.41 | 0.91 |
| 1839 | WLAHKALCTEKLEQWLCE   | 18 | -0.1  | 0.56 | 0.56 | -0.21 | 0.77 | -0.15 | 0.72 | -0.5 | 5.51  | 2201.86 | 0.97 | 0.35 | 0.69 |
| 1840 | LAHKALCTEKLEQWLCEK   | 18 | -0.19 | 0.57 | 0.57 | -0.37 | 0.97 | 0.21  | 0.78 | 0.5  | 7.04  | 2143.82 | 0.99 | 0.37 | 0.42 |
| 1841 | AHKALCTEKLEQWLCEKL   | 18 | -0.19 | 0.57 | 0.57 | -0.37 | 0.97 | 0.21  | 0.78 | 0.5  | 7.04  | 2143.82 | 0.94 | 0.30 | 0.77 |
| 1842 | MRFFVPLFLVGILFPAILA  | 19 | 0.32  | 0.61 | 0.61 | 2.17  | 0.13 | -1.22 | 0.21 | 1    | 10.11 | 2165.06 | 0.93 | 0.65 | 0.91 |
| 1843 | RFVPLFLVGILFPAILAK   | 19 | 0.25  | 0.61 | 0.61 | 1.86  | 0.32 | -0.99 | 0.32 | 2    | 11.01 | 2162.04 | 0.98 | 0.72 | 0.98 |
| 1844 | FFVPLFLVGILFPAILAKQ  | 19 | 0.31  | 0.61 | 0.61 | 1.92  | 0.26 | -1.14 | 0.21 | 1    | 9.11  | 2133.99 | 0.94 | 0.66 | 0.98 |
| 1845 | FVPLFLVGILFPAILAKQF  | 19 | 0.31  | 0.61 | 0.61 | 1.92  | 0.26 | -1.14 | 0.21 | 1    | 9.11  | 2133.99 | 0.94 | 0.65 | 0.98 |
| 1846 | VPLFLVGILFPAILAKQFT  | 19 | 0.27  | 0.6  | 0.6  | 1.73  | 0.26 | -1.03 | 0.26 | 1    | 9.11  | 2087.92 | 0.98 | 0.57 | 0.75 |
| 1847 | PLFLVGILFPAILAKQFTK  | 19 | 0.18  | 0.6  | 0.6  | 1.31  | 0.45 | -0.79 | 0.37 | 2    | 10.02 | 2116.96 | 0.98 | 0.57 | 0.98 |
| 1848 | LFLVGILFPAILAKQFTKC  | 19 | 0.18  | 0.61 | 0.61 | 1.52  | 0.45 | -0.84 | 0.37 | 2    | 9.36  | 2122.98 | 0.93 | 0.58 | 0.99 |
| 1849 | FLVGILFPAILAKQFTKCE  | 19 | 0.12  | 0.62 | 0.62 | 1.14  | 0.52 | -0.59 | 0.42 | 1    | 8.54  | 2138.93 | 0.94 | 0.52 | 0.98 |
| 1850 | LVGILFPAILAKQFTKCEL  | 19 | 0.12  | 0.61 | 0.61 | 1.19  | 0.52 | -0.55 | 0.42 | 1    | 8.54  | 2104.92 | 0.93 | 0.44 | 0.70 |
| 1851 | VGILFPAILAKQFTKCELS  | 19 | 0.08  | 0.61 | 0.61 | 0.95  | 0.52 | -0.44 | 0.47 | 1    | 8.54  | 2078.83 | 0.93 | 0.47 | 0.93 |
| 1852 | GILFPAILAKQFTKCELSQ  | 19 | 0.01  | 0.61 | 0.61 | 0.54  | 0.58 | -0.35 | 0.58 | 1    | 8.54  | 2107.83 | 0.83 | 0.49 | 0.88 |
| 1853 | ILFPAILAKQFTKCELSQL  | 19 | 0.03  | 0.6  | 0.6  | 0.76  | 0.58 | -0.45 | 0.58 | 1    | 8.54  | 2163.94 | 0.93 | 0.50 | 0.42 |
| 1854 | LFPAILAKQFTKCELSQLL  | 19 | 0.02  | 0.59 | 0.59 | 0.73  | 0.58 | -0.45 | 0.58 | 1    | 8.54  | 2163.94 | 0.93 | 0.44 | 0.87 |

|      |                      |    |       |      |      |       |      |       |      |      |       |         |      |      |      |
|------|----------------------|----|-------|------|------|-------|------|-------|------|------|-------|---------|------|------|------|
| 1855 | FPAILAKQFTKCELSQLLK  | 19 | -0.06 | 0.6  | 0.6  | 0.32  | 0.78 | -0.19 | 0.68 | 2    | 9.25  | 2178.95 | 0.94 | 0.44 | 0.92 |
| 1856 | PAILAKQFTKCELSQLLKD  | 19 | -0.13 | 0.6  | 0.6  | -0.01 | 0.78 | 0.09  | 0.74 | 1    | 8.51  | 2146.86 | 0.93 | 0.44 | 0.76 |
| 1857 | AILAKQFTKCELSQLLKDI  | 19 | -0.09 | 0.62 | 0.62 | 0.31  | 0.78 | 0     | 0.74 | 1    | 8.51  | 2162.91 | 0.94 | 0.38 | 0.62 |
| 1858 | ILAKQFTKCELSQLLKIDID | 19 | -0.14 | 0.63 | 0.63 | 0.03  | 0.78 | 0.18  | 0.79 | 0    | 6.43  | 2206.92 | 0.99 | 0.41 | 0.42 |
| 1859 | LAKQFTKCELSQLLKIDIDG | 19 | -0.17 | 0.63 | 0.63 | -0.23 | 0.78 | 0.28  | 0.79 | 0    | 6.43  | 2150.81 | 0.99 | 0.39 | 0.35 |
| 1860 | AKQFTKCELSQLLKIDIDY  | 19 | -0.2  | 0.64 | 0.64 | -0.49 | 0.78 | 0.25  | 0.84 | 0    | 6.43  | 2200.82 | 0.61 | 0.29 | 0.04 |
| 1861 | KQFTKCELSQLLKIDIDYGY | 19 | -0.2  | 0.65 | 0.65 | -0.61 | 0.78 | 0.28  | 0.84 | 0    | 6.43  | 2186.8  | 0.99 | 0.32 | 0.10 |
| 1862 | QFTKCELSQLLKIDIDYGG  | 19 | -0.14 | 0.65 | 0.65 | -0.43 | 0.58 | 0.12  | 0.74 | -1   | 4.56  | 2115.68 | 0.94 | 0.30 | 0.05 |
| 1863 | FTKCELSQLLKIDIDYGGI  | 19 | -0.06 | 0.65 | 0.65 | -0.01 | 0.52 | 0.02  | 0.63 | -1   | 4.56  | 2100.71 | 0.61 | 0.28 | 0.12 |
| 1864 | TKCELSQLLKIDIDYGGIA  | 19 | -0.08 | 0.64 | 0.64 | -0.06 | 0.52 | 0.12  | 0.63 | -1   | 4.56  | 2024.61 | 0.99 | 0.31 | 0.06 |
| 1865 | KCELSQLLKIDIDYGGIAL  | 19 | -0.04 | 0.64 | 0.64 | 0.18  | 0.52 | 0.05  | 0.58 | -1   | 4.56  | 2036.67 | 0.99 | 0.30 | 0.13 |
| 1866 | CELSQLLKIDIDYGGIALP  | 19 | 0.01  | 0.62 | 0.62 | 0.3   | 0.33 | -0.11 | 0.47 | -2   | 4.03  | 2005.61 | 0.61 | 0.35 | 0.03 |
| 1867 | ELSQLLKIDIDYGGIALPE  | 19 | -0.02 | 0.63 | 0.63 | -0.02 | 0.39 | 0.1   | 0.53 | -3   | 3.92  | 2031.59 | 0.61 | 0.36 | 0.03 |
| 1868 | LSQLLKIDIDYGGIALPEL  | 19 | 0.04  | 0.62 | 0.62 | 0.37  | 0.33 | -0.15 | 0.47 | -2   | 4.03  | 2015.64 | 0.99 | 0.36 | 0.04 |
| 1869 | SQLLKIDIDYGGIALPELI  | 19 | 0.05  | 0.63 | 0.63 | 0.41  | 0.33 | -0.15 | 0.47 | -2   | 4.03  | 2015.64 | 0.99 | 0.34 | 0.04 |
| 1870 | QLLKIDIDYGGIALPELIC  | 19 | 0.06  | 0.63 | 0.63 | 0.58  | 0.33 | -0.22 | 0.42 | -2   | 4.03  | 2031.7  | 0.94 | 0.34 | 0.04 |
| 1871 | LLKIDIDYGGIALPELIC   | 19 | 0.09  | 0.62 | 0.62 | 0.73  | 0.26 | -0.25 | 0.37 | -2   | 4.03  | 2004.67 | 0.99 | 0.38 | 0.05 |
| 1872 | LKIDIDYGGIALPELIC    | 19 | 0.07  | 0.64 | 0.64 | 0.63  | 0.26 | -0.23 | 0.37 | -2   | 4.03  | 2022.7  | 0.97 | 0.43 | 0.03 |
| 1873 | KIDIDYGGIALPELIC     | 19 | 0.08  | 0.65 | 0.65 | 0.57  | 0.26 | -0.26 | 0.37 | -2   | 4.03  | 2056.71 | 0.99 | 0.42 | 0.03 |
| 1874 | DIDYGGIALPELIC       | 19 | 0.12  | 0.61 | 0.61 | 0.61  | 0.14 | -0.45 | 0.32 | -2.5 | 4.03  | 2065.68 | 0.86 | 0.50 | 0.06 |
| 1875 | IDYGGIALPELIC        | 19 | 0.14  | 0.6  | 0.6  | 0.76  | 0.14 | -0.63 | 0.32 | -1.5 | 4.36  | 2051.7  | 0.97 | 0.53 | 0.05 |
| 1876 | DYGGIALPELIC         | 19 | 0.09  | 0.59 | 0.59 | 0.48  | 0.14 | -0.52 | 0.37 | -1.5 | 4.36  | 2025.61 | 0.86 | 0.44 | 0.07 |
| 1877 | YGGIALPELIC          | 19 | 0.14  | 0.59 | 0.59 | 0.64  | 0.14 | -0.67 | 0.32 | -0.5 | 5.25  | 1967.58 | 0.98 | 0.34 | 0.41 |
| 1878 | GGIALPELIC           | 19 | 0.13  | 0.59 | 0.59 | 0.59  | 0.14 | -0.79 | 0.37 | -0.5 | 5.25  | 2073.7  | 0.99 | 0.34 | 0.11 |
| 1879 | GIALPELIC            | 19 | 0.09  | 0.59 | 0.59 | 0.48  | 0.14 | -0.52 | 0.37 | -1.5 | 4.36  | 2025.61 | 0.98 | 0.32 | 0.20 |
| 1880 | IALPELIC             | 19 | 0.07  | 0.58 | 0.58 | 0.46  | 0.14 | -0.54 | 0.42 | -1.5 | 4.36  | 2069.66 | 0.95 | 0.30 | 0.09 |
| 1881 | LPELIC               | 19 | 0.03  | 0.58 | 0.58 | 0.3   | 0.21 | -0.53 | 0.53 | -1.5 | 4.36  | 2140.74 | 0.93 | 0.29 | 0.05 |
| 1882 | ALPELIC              | 19 | 0     | 0.57 | 0.57 | 0.16  | 0.21 | -0.46 | 0.53 | -1.5 | 4.36  | 2098.65 | 0.80 | 0.29 | 0.03 |
| 1883 | LPELIC               | 19 | 0.03  | 0.58 | 0.58 | 0.3   | 0.21 | -0.53 | 0.53 | -1.5 | 4.36  | 2140.74 | 0.98 | 0.29 | 0.03 |
| 1884 | PELIC                | 19 | 0.03  | 0.59 | 0.59 | 0.32  | 0.21 | -0.51 | 0.53 | -1.5 | 4.36  | 2126.71 | 0.87 | 0.29 | 0.04 |
| 1885 | ELICTMFHTSGYDTQAI    | 19 | 0     | 0.61 | 0.61 | 0.22  | 0.28 | -0.35 | 0.58 | -2.5 | 4.14  | 2158.71 | 0.80 | 0.34 | 0.03 |
| 1886 | LICTMFHTSGYDTQAI     | 19 | 0     | 0.61 | 0.61 | 0.22  | 0.21 | -0.5  | 0.63 | -1.5 | 4.36  | 2143.7  | 0.93 | 0.40 | 0.05 |
| 1887 | ICTMFHTSGYDTQAI      | 19 | -0.06 | 0.62 | 0.62 | -0.16 | 0.21 | -0.39 | 0.74 | -1.5 | 4.36  | 2144.64 | 0.93 | 0.40 | 0.22 |
| 1888 | CTMFHTSGYDTQAI       | 19 | -0.13 | 0.62 | 0.62 | -0.58 | 0.28 | -0.14 | 0.79 | -2.5 | 4.14  | 2160.59 | 0.94 | 0.34 | 0.08 |
| 1889 | TMFHTSGYDTQAI        | 19 | -0.15 | 0.62 | 0.62 | -0.76 | 0.28 | -0.07 | 0.84 | -2.5 | 4.14  | 2144.53 | 0.93 | 0.34 | 0.06 |
| 1890 | MFHTSGYDTQAI         | 19 | -0.15 | 0.62 | 0.62 | -0.76 | 0.28 | -0.07 | 0.84 | -2.5 | 4.14  | 2144.53 | 0.93 | 0.34 | 0.04 |
| 1891 | FHTSGYDTQAI          | 19 | -0.19 | 0.61 | 0.61 | -1.04 | 0.34 | 0.15  | 0.89 | -3.5 | 4     | 2142.45 | 0.94 | 0.34 | 0.03 |
| 1892 | HTSGYDTQAI           | 19 | -0.23 | 0.61 | 0.61 | -1.26 | 0.34 | 0.16  | 0.95 | -3.5 | 4     | 2158.45 | 0.98 | 0.30 | 0.04 |
| 1893 | TSGYDTQAI            | 19 | -0.2  | 0.65 | 0.65 | -1.11 | 0.27 | 0.19  | 0.89 | -4   | 3.51  | 2078.36 | 0.93 | 0.29 | 0.03 |
| 1894 | SGYDTQAI             | 19 | -0.16 | 0.65 | 0.65 | -0.87 | 0.27 | 0.12  | 0.84 | -4   | 3.51  | 2090.42 | 0.93 | 0.32 | 0.04 |
| 1895 | GYDTQAI              | 19 | -0.11 | 0.66 | 0.66 | -0.68 | 0.27 | -0.03 | 0.79 | -4   | 3.51  | 2150.52 | 0.83 | 0.34 | 0.03 |
| 1896 | YDTQAI               | 19 | -0.16 | 0.66 | 0.66 | -0.85 | 0.33 | -0.02 | 0.89 | -4   | 3.51  | 2221.6  | 0.93 | 0.34 | 0.05 |
| 1897 | DTQAI                | 19 | -0.12 | 0.66 | 0.66 | -0.54 | 0.33 | 0.01  | 0.84 | -4   | 3.51  | 2171.59 | 0.94 | 0.37 | 0.08 |
| 1898 | TQAI                 | 19 | -0.1  | 0.65 | 0.65 | -0.4  | 0.33 | -0.14 | 0.84 | -3   | 3.68  | 2143.58 | 0.98 | 0.42 | 0.15 |
| 1899 | QAI                  | 19 | -0.12 | 0.66 | 0.66 | -0.55 | 0.33 | -0.11 | 0.89 | -3   | 3.68  | 2156.58 | 0.98 | 0.40 | 0.05 |
| 1900 | AIVENNE              | 19 | -0.14 | 0.66 | 0.66 | -0.57 | 0.46 | 0.04  | 0.89 | -2   | 4.26  | 2156.62 | 0.80 | 0.44 | 0.04 |
| 1901 | IVENNE               | 19 | -0.13 | 0.66 | 0.66 | -0.46 | 0.46 | -0.03 | 0.89 | -2   | 4.26  | 2198.71 | 0.87 | 0.44 | 0.07 |
| 1902 | VENNE                | 19 | -0.15 | 0.65 | 0.65 | -0.75 | 0.46 | -0.11 | 0.95 | -2   | 4.26  | 2271.76 | 0.98 | 0.40 | 0.07 |
| 1903 | ENNE                 | 19 | -0.17 | 0.64 | 0.64 | -0.84 | 0.46 | -0.08 | 0.95 | -2   | 4.26  | 2275.76 | 0.80 | 0.39 | 0.08 |
| 1904 | NNESTE               | 19 | -0.2  | 0.64 | 0.64 | -0.86 | 0.59 | -0.08 | 1    | 0    | 6.45  | 2274.82 | 0.94 | 0.37 | 0.23 |
| 1905 | NESTE                | 19 | -0.18 | 0.63 | 0.63 | -0.72 | 0.59 | -0.08 | 0.95 | 0    | 6.45  | 2247.79 | 0.99 | 0.40 | 0.10 |
| 1906 | ESTE                 | 19 | -0.16 | 0.62 | 0.62 | -0.57 | 0.59 | -0.07 | 0.89 | 0    | 6.45  | 2220.76 | 0.61 | 0.49 | 0.08 |
| 1907 | STE                  | 19 | -0.16 | 0.62 | 0.62 | -0.57 | 0.58 | -0.22 | 0.95 | 1    | 8.51  | 2219.78 | 0.97 | 0.50 | 0.11 |
| 1908 | TE                   | 19 | -0.12 | 0.63 | 0.63 | -0.31 | 0.58 | -0.32 | 0.89 | 1    | 8.51  | 2231.84 | 0.99 | 0.53 | 0.05 |
| 1909 | EY                   | 19 | -0.11 | 0.62 | 0.62 | -0.36 | 0.58 | -0.29 | 0.84 | 1    | 8.51  | 2227.85 | 0.61 | 0.54 | 0.16 |
| 1910 | Y                    | 19 | -0.12 | 0.62 | 0.62 | -0.36 | 0.58 | -0.44 | 0.89 | 2    | 9.25  | 2226.87 | 0.99 | 0.53 | 0.13 |
| 1911 | GL                   | 19 | -0.13 | 0.61 | 0.61 | -0.33 | 0.58 | -0.31 | 0.89 | 2    | 9.36  | 2150.77 | 0.98 | 0.50 | 0.57 |
| 1912 | LF                   | 19 | -0.23 | 0.61 | 0.61 | -0.55 | 0.71 | -0.15 | 1.11 | 3    | 10.07 | 2249.9  | 0.94 | 0.48 | 0.10 |
| 1913 | F                    | 19 | -0.29 | 0.62 | 0.62 | -0.93 | 0.71 | -0.04 | 1.21 | 3    | 10.07 | 2250.84 | 0.61 | 0.45 | 0.06 |
| 1914 | Q                    | 19 | -0.29 | 0.62 | 0.62 | -0.84 | 0.71 | -0.01 | 1.21 | 3    | 10.07 | 2216.83 | 0.99 | 0.46 | 0.06 |
| 1915 | IS                   | 19 | -0.25 | 0.62 | 0.62 | -0.53 | 0.65 | -0.07 | 1.11 | 3    | 9.53  | 2191.83 | 0.99 | 0.46 | 0.45 |
| 1916 | SN                   | 19 | -0.33 | 0.62 | 0.62 | -0.95 | 0.65 | 0.18  | 1.16 | 2    | 8.98  | 2193.75 | 0.99 | 0.44 | 0.18 |
| 1917 | NK                   | 19 | -0.27 | 0.63 | 0.63 | -0.67 | 0.65 | 0.07  | 1.11 | 2    | 8.98  | 2219.84 | 0.99 | 0.45 | 0.16 |
| 1918 | KL                   | 19 | -0.25 | 0.62 | 0.62 | -0.53 | 0.65 | 0.08  | 1.05 | 2    | 8.98  | 2192.81 | 0.99 | 0.47 | 0.52 |



|      |                       |    |       |      |      |       |      |       |      |      |       |         |      |      |      |
|------|-----------------------|----|-------|------|------|-------|------|-------|------|------|-------|---------|------|------|------|
| 1919 | LWCKSSQVPQSRNICDISC   | 19 | -0.19 | 0.62 | 0.62 | -0.19 | 0.45 | -0.13 | 0.95 | 1    | 8.26  | 2167.77 | 0.97 | 0.44 | 0.75 |
| 1920 | WCKSSQVPQSRNICDISC    | 19 | -0.26 | 0.63 | 0.63 | -0.57 | 0.45 | 0.12  | 1    | 0    | 6.23  | 2169.69 | 0.97 | 0.43 | 0.56 |
| 1921 | CKSSQVPQSRNICDISCDK   | 19 | -0.34 | 0.64 | 0.64 | -0.73 | 0.65 | 0.46  | 1.05 | 1    | 8.24  | 2111.65 | 0.86 | 0.40 | 0.11 |
| 1922 | KSSQVPQSRNICDISCDKF   | 19 | -0.31 | 0.64 | 0.64 | -0.72 | 0.65 | 0.38  | 1.05 | 1    | 8.36  | 2155.69 | 0.99 | 0.46 | 0.11 |
| 1923 | SSQVPQSRNICDISCDKFL   | 19 | -0.22 | 0.63 | 0.63 | -0.31 | 0.45 | 0.13  | 0.95 | 0    | 6.25  | 2140.68 | 0.99 | 0.47 | 0.27 |
| 1924 | SQVPQSRNICDISCDKFLD   | 19 | -0.25 | 0.65 | 0.65 | -0.45 | 0.45 | 0.27  | 0.95 | -1   | 4.43  | 2168.69 | 0.99 | 0.36 | 0.18 |
| 1925 | QVPQSRNICDISCDKFLDD   | 19 | -0.27 | 0.66 | 0.66 | -0.59 | 0.45 | 0.41  | 0.95 | -2   | 4.14  | 2196.7  | 0.99 | 0.34 | 0.10 |
| 1926 | VPQSRNICDISCDKFLDDD   | 19 | -0.27 | 0.66 | 0.66 | -0.59 | 0.39 | 0.56  | 0.89 | -3   | 3.98  | 2183.65 | 0.98 | 0.33 | 0.07 |
| 1927 | PQSRNICDISCDKFLDDDI   | 19 | -0.26 | 0.66 | 0.66 | -0.58 | 0.39 | 0.54  | 0.89 | -3   | 3.98  | 2197.68 | 0.87 | 0.33 | 0.13 |
| 1928 | QSRNICDISCDKFLDDDI    | 19 | -0.27 | 0.67 | 0.67 | -0.53 | 0.39 | 0.52  | 0.95 | -3   | 3.98  | 2201.67 | 0.98 | 0.37 | 0.09 |
| 1929 | SRNICDISCDKFLDDDI     | 19 | -0.27 | 0.68 | 0.68 | -0.53 | 0.32 | 0.67  | 0.89 | -4   | 3.86  | 2188.62 | 0.98 | 0.36 | 0.06 |
| 1930 | RNICDISCDKFLDDDI      | 19 | -0.29 | 0.69 | 0.69 | -0.67 | 0.32 | 0.81  | 0.89 | -5   | 3.77  | 2216.63 | 0.99 | 0.36 | 0.04 |
| 1931 | NICDISCDKFLDDDI       | 19 | -0.16 | 0.69 | 0.69 | -0.2  | 0.19 | 0.56  | 0.68 | -6   | 3.5   | 2173.61 | 0.99 | 0.36 | 0.04 |
| 1932 | ICDISCDKFLDDDI        | 19 | -0.11 | 0.69 | 0.69 | 0.08  | 0.19 | 0.48  | 0.58 | -6   | 3.5   | 2190.7  | 0.99 | 0.32 | 0.08 |
| 1933 | CDISCDKFLDDDI         | 19 | -0.15 | 0.69 | 0.69 | -0.02 | 0.19 | 0.52  | 0.58 | -6   | 3.5   | 2180.67 | 0.61 | 0.33 | 0.05 |
| 1934 | DISCDKFLDDDI          | 19 | -0.14 | 0.68 | 0.68 | -0.06 | 0.19 | 0.55  | 0.58 | -6   | 3.5   | 2148.61 | 0.61 | 0.33 | 0.03 |
| 1935 | ISCDKFLDDDI           | 19 | -0.16 | 0.68 | 0.68 | -0.08 | 0.39 | 0.55  | 0.63 | -4   | 3.86  | 2161.7  | 0.99 | 0.34 | 0.14 |
| 1936 | SCDKFLDDDI            | 19 | -0.26 | 0.68 | 0.68 | -0.52 | 0.58 | 0.8   | 0.74 | -3   | 4.12  | 2176.71 | 0.98 | 0.36 | 0.28 |
| 1937 | CDKFLDDDI             | 19 | -0.2  | 0.68 | 0.68 | -0.24 | 0.58 | 0.69  | 0.68 | -3   | 4.12  | 2202.8  | 0.61 | 0.35 | 0.05 |
| 1938 | DKFLDDDI              | 19 | -0.18 | 0.68 | 0.68 | -0.17 | 0.58 | 0.65  | 0.68 | -3   | 4.12  | 2212.83 | 0.61 | 0.39 | 0.08 |
| 1939 | KFLDDDI               | 19 | -0.18 | 0.68 | 0.68 | -0.17 | 0.58 | 0.65  | 0.68 | -3   | 4.12  | 2212.83 | 0.98 | 0.48 | 0.03 |
| 1940 | FLDDDI                | 19 | -0.08 | 0.68 | 0.68 | 0.27  | 0.39 | 0.39  | 0.58 | -4   | 3.86  | 2197.82 | 0.61 | 0.46 | 0.03 |
| 1941 | LDDDI                 | 19 | -0.17 | 0.68 | 0.68 | -0.08 | 0.58 | 0.68  | 0.68 | -3   | 4.12  | 2178.82 | 0.99 | 0.38 | 0.04 |
| 1942 | DDDI                  | 19 | -0.19 | 0.69 | 0.69 | -0.31 | 0.58 | 0.78  | 0.68 | -3   | 4.12  | 2122.71 | 0.61 | 0.36 | 0.05 |
| 1943 | DDDI                  | 19 | -0.12 | 0.68 | 0.68 | 0.12  | 0.58 | 0.53  | 0.63 | -2   | 4.29  | 2120.79 | 0.61 | 0.34 | 0.09 |
| 1944 | DITDI                 | 19 | -0.12 | 0.68 | 0.68 | 0.12  | 0.58 | 0.53  | 0.63 | -2   | 4.29  | 2120.79 | 0.61 | 0.32 | 0.08 |
| 1945 | ITDDI                 | 19 | -0.08 | 0.68 | 0.68 | 0.23  | 0.58 | 0.25  | 0.63 | -1   | 4.58  | 2168.88 | 0.99 | 0.33 | 0.08 |
| 1946 | TDDI                  | 19 | -0.1  | 0.67 | 0.67 | -0.05 | 0.58 | 0.16  | 0.68 | -1   | 4.58  | 2241.93 | 0.98 | 0.42 | 0.05 |
| 1947 | DDI                   | 19 | -0.06 | 0.67 | 0.67 | 0.18  | 0.58 | 0.09  | 0.63 | -1   | 4.58  | 2253.99 | 0.94 | 0.44 | 0.11 |
| 1948 | DIMCAKKILDIGIDY       | 19 | -0.01 | 0.66 | 0.66 | 0.46  | 0.58 | -0.09 | 0.58 | 0    | 6.35  | 2209.98 | 0.94 | 0.45 | 0.92 |
| 1949 | IMCAKKILDIGIDY        | 19 | 0.01  | 0.62 | 0.62 | 0.48  | 0.66 | -0.28 | 0.58 | 1.5  | 8.48  | 2232.04 | 0.93 | 0.47 | 0.98 |
| 1950 | MCAKKILDIGIDY         | 19 | -0.09 | 0.62 | 0.62 | 0.04  | 0.85 | -0.03 | 0.68 | 2.5  | 9.1   | 2247.05 | 0.93 | 0.48 | 0.97 |
| 1951 | CAKKILDIGIDY          | 19 | -0.09 | 0.6  | 0.6  | 0.03  | 0.85 | 0.02  | 0.68 | 2.5  | 9.1   | 2186.93 | 0.69 | 0.54 | 0.98 |
| 1952 | AKKILDIGIDY           | 19 | -0.06 | 0.6  | 0.6  | 0.1   | 0.85 | -0.03 | 0.68 | 2.5  | 9.43  | 2196.96 | 0.86 | 0.53 | 0.98 |
| 1953 | KKILDIGIDY            | 19 | -0.07 | 0.6  | 0.6  | 0.14  | 0.85 | -0.05 | 0.68 | 2.5  | 9.1   | 2229.02 | 0.98 | 0.43 | 0.97 |
| 1954 | KILDIGIDY             | 19 | -0.02 | 0.6  | 0.6  | 0.31  | 0.66 | -0.23 | 0.63 | 1.5  | 8.48  | 2201.95 | 0.98 | 0.44 | 0.60 |
| 1955 | ILDIGIDY              | 19 | 0     | 0.6  | 0.6  | 0.33  | 0.53 | -0.23 | 0.58 | -0.5 | 5.39  | 2202.89 | 0.98 | 0.43 | 0.10 |
| 1956 | LDIGIDY               | 19 | -0.09 | 0.59 | 0.59 | -0.12 | 0.72 | 0.02  | 0.68 | 0.5  | 7.06  | 2217.9  | 0.98 | 0.42 | 0.25 |
| 1957 | DIKIDY                | 19 | -0.09 | 0.59 | 0.59 | -0.12 | 0.72 | 0.02  | 0.68 | 0.5  | 7.06  | 2217.9  | 0.94 | 0.48 | 0.26 |
| 1958 | IKIDY                 | 19 | -0.09 | 0.59 | 0.59 | -0.12 | 0.79 | 0.02  | 0.68 | 0.5  | 7.06  | 2231.93 | 0.98 | 0.46 | 0.10 |
| 1959 | KGIDY                 | 19 | -0.16 | 0.59 | 0.59 | -0.54 | 0.86 | 0.13  | 0.79 | 0.5  | 7.06  | 2246.9  | 0.98 | 0.43 | 0.09 |
| 1960 | GIDY                  | 19 | -0.09 | 0.58 | 0.58 | -0.38 | 0.66 | -0.21 | 0.74 | -0.5 | 5.46  | 2304.94 | 0.83 | 0.42 | 0.16 |
| 1961 | IDY                   | 19 | -0.07 | 0.57 | 0.57 | -0.16 | 0.66 | -0.31 | 0.74 | -0.5 | 5.46  | 2361.05 | 0.98 | 0.41 | 0.45 |
| 1962 | DYLAHKALCTEKLEQWL     | 19 | -0.1  | 0.57 | 0.57 | -0.26 | 0.66 | -0.26 | 0.74 | -0.5 | 5.46  | 2351.02 | 0.86 | 0.41 | 0.74 |
| 1963 | YLAHKALCTEKLEQWL      | 19 | -0.1  | 0.56 | 0.56 | -0.26 | 0.73 | -0.26 | 0.74 | -0.5 | 5.51  | 2365.05 | 0.98 | 0.39 | 0.74 |
| 1964 | WLAHKALCTEKLEQWL      | 19 | -0.16 | 0.56 | 0.56 | -0.4  | 0.92 | 0.02  | 0.79 | 0.5  | 7.04  | 2330.05 | 0.99 | 0.35 | 0.68 |
| 1965 | LAHKALCTEKLEQWL       | 19 | -0.15 | 0.56 | 0.56 | -0.15 | 0.92 | 0.1   | 0.74 | 0.5  | 7.04  | 2257    | 0.98 | 0.38 | 0.79 |
| 1966 | MRFVPLFLVGLFPAILAK    | 20 | 0.25  | 0.61 | 0.61 | 1.86  | 0.31 | -1.01 | 0.3  | 2    | 11.01 | 2293.25 | 0.93 | 0.70 | 0.99 |
| 1967 | RFFVPLFLVGLFPAILAKQ   | 20 | 0.2   | 0.61 | 0.61 | 1.59  | 0.37 | -0.93 | 0.4  | 2    | 11.01 | 2290.19 | 0.98 | 0.66 | 0.97 |
| 1968 | FFVPLFLVGLFPAILAKQF   | 20 | 0.32  | 0.61 | 0.61 | 1.96  | 0.25 | -1.21 | 0.2  | 1    | 9.11  | 2281.18 | 0.94 | 0.65 | 0.99 |
| 1969 | FVPLFLVGLFPAILAKQFT   | 20 | 0.28  | 0.6  | 0.6  | 1.78  | 0.25 | -1.1  | 0.25 | 1    | 9.11  | 2235.11 | 0.94 | 0.59 | 0.95 |
| 1970 | VPLFLVGLFPAILAKQFTK   | 20 | 0.2   | 0.6  | 0.6  | 1.45  | 0.43 | -0.82 | 0.35 | 2    | 10.02 | 2216.11 | 0.98 | 0.56 | 0.98 |
| 1971 | PLFLVGLFPAILAKQFTKC   | 20 | 0.17  | 0.6  | 0.6  | 1.37  | 0.43 | -0.8  | 0.35 | 2    | 9.36  | 2220.11 | 0.98 | 0.56 | 0.98 |
| 1972 | LFLVGLFPAILAKQFTKCE   | 20 | 0.14  | 0.61 | 0.61 | 1.27  | 0.49 | -0.65 | 0.4  | 1    | 8.54  | 2252.11 | 0.93 | 0.55 | 0.85 |
| 1973 | FLVGLFPAILAKQFTKCEL   | 20 | 0.14  | 0.61 | 0.61 | 1.27  | 0.49 | -0.65 | 0.4  | 1    | 8.54  | 2252.11 | 0.94 | 0.46 | 0.92 |
| 1974 | LVGLFPAILAKQFTKCELS   | 20 | 0.1   | 0.6  | 0.6  | 1.09  | 0.49 | -0.51 | 0.45 | 1    | 8.54  | 2192.01 | 0.93 | 0.44 | 0.56 |
| 1975 | VGILFPAILAKQFTKCELSQ  | 20 | 0.04  | 0.61 | 0.61 | 0.73  | 0.56 | -0.41 | 0.55 | 1    | 8.54  | 2206.98 | 0.93 | 0.48 | 0.74 |
| 1976 | GILFPAILAKQFTKCELSQL  | 20 | 0.04  | 0.6  | 0.6  | 0.71  | 0.56 | -0.42 | 0.55 | 1    | 8.54  | 2221.01 | 0.83 | 0.49 | 0.78 |
| 1977 | ILFPAILAKQFTKCELSQLL  | 20 | 0.06  | 0.6  | 0.6  | 0.92  | 0.56 | -0.52 | 0.55 | 1    | 8.54  | 2277.12 | 0.93 | 0.47 | 0.83 |
| 1978 | LFPAILAKQFTKCELSQLLK  | 20 | -0.03 | 0.6  | 0.6  | 0.49  | 0.74 | -0.28 | 0.65 | 2    | 9.25  | 2292.13 | 0.93 | 0.44 | 0.90 |
| 1979 | FPAILAKQFTKCELSQLLKD  | 20 | -0.1  | 0.61 | 0.61 | 0.13  | 0.74 | -0.03 | 0.7  | 1    | 8.51  | 2294.05 | 0.94 | 0.44 | 0.84 |
| 1980 | PAILAKQFTKCELSQLLKDID | 20 | -0.09 | 0.61 | 0.61 | 0.21  | 0.74 | 0     | 0.7  | 1    | 8.51  | 2260.04 | 0.93 | 0.42 | 0.54 |
| 1981 | AILAKQFTKCELSQLLKDID  | 20 | -0.12 | 0.63 | 0.63 | 0.12  | 0.74 | 0.15  | 0.75 | 0    | 6.43  | 2278.01 | 0.94 | 0.41 | 0.47 |
| 1982 | ILAKQFTKCELSQLLKDIDG  | 20 | -0.13 | 0.63 | 0.63 | 0.01  | 0.74 | 0.18  | 0.75 | 0    | 6.43  | 2263.99 | 0.99 | 0.43 | 0.11 |

|      |                       |    |       |      |      |       |      |       |      |      |       |         |      |      |      |
|------|-----------------------|----|-------|------|------|-------|------|-------|------|------|-------|---------|------|------|------|
| 1983 | LAKQFTKCELSQLLKIDIDGY | 20 | -0.16 | 0.63 | 0.63 | -0.28 | 0.74 | 0.15  | 0.8  | 0    | 6.43  | 2314    | 0.99 | 0.36 | 0.26 |
| 1984 | AKQFTKCELSQLLKIDIDGYG | 20 | -0.18 | 0.64 | 0.64 | -0.49 | 0.74 | 0.24  | 0.8  | 0    | 6.43  | 2257.89 | 0.61 | 0.31 | 0.04 |
| 1985 | KQFTKCELSQLLKIDIDGYGG | 20 | -0.19 | 0.65 | 0.65 | -0.6  | 0.74 | 0.27  | 0.8  | 0    | 6.43  | 2243.87 | 0.99 | 0.33 | 0.05 |
| 1986 | QFTKCELSQLLKIDIDGYGGI | 20 | -0.09 | 0.65 | 0.65 | -0.18 | 0.56 | 0.03  | 0.7  | -1   | 4.56  | 2228.86 | 0.94 | 0.31 | 0.03 |
| 1987 | FTKCELSQLLKIDIDGYGGIA | 20 | -0.05 | 0.64 | 0.64 | 0.08  | 0.49 | -0.01 | 0.6  | -1   | 4.56  | 2171.8  | 0.61 | 0.29 | 0.22 |
| 1988 | TKCELSQLLKIDIDGYGGIAL | 20 | -0.05 | 0.63 | 0.63 | 0.13  | 0.49 | 0.02  | 0.6  | -1   | 4.56  | 2137.79 | 0.99 | 0.35 | 0.05 |
| 1989 | KCELSQLLKIDIDGYGGIALP | 20 | -0.05 | 0.63 | 0.63 | 0.09  | 0.49 | 0.05  | 0.55 | -1   | 4.56  | 2133.8  | 0.98 | 0.37 | 0.12 |
| 1990 | CELSQLLKIDIDGYGGIALPE | 20 | -0.02 | 0.63 | 0.63 | 0.11  | 0.37 | 0.04  | 0.5  | -3   | 3.92  | 2134.74 | 0.61 | 0.38 | 0.03 |
| 1991 | ELSQLLKIDIDGYGGIALPEL | 20 | 0     | 0.62 | 0.62 | 0.17  | 0.37 | 0     | 0.5  | -3   | 3.92  | 2144.77 | 0.61 | 0.39 | 0.03 |
| 1992 | LSQLLKIDIDGYGGIALPELI | 20 | 0.07  | 0.62 | 0.62 | 0.57  | 0.31 | -0.23 | 0.45 | -2   | 4.03  | 2128.82 | 0.99 | 0.38 | 0.03 |
| 1993 | SQLLKIDIDGYGGIALPELIC | 20 | 0.05  | 0.63 | 0.63 | 0.51  | 0.31 | -0.2  | 0.45 | -2   | 4.03  | 2118.79 | 0.99 | 0.37 | 0.10 |
| 1994 | QLLKIDIDGYGGIALPELICT | 20 | 0.05  | 0.63 | 0.63 | 0.51  | 0.31 | -0.23 | 0.45 | -2   | 4.03  | 2132.82 | 0.94 | 0.35 | 0.04 |
| 1995 | LLKIDIDGYGGIALPELICTM | 20 | 0.1   | 0.63 | 0.63 | 0.79  | 0.25 | -0.31 | 0.35 | -2   | 4.03  | 2135.88 | 0.97 | 0.43 | 0.12 |
| 1996 | LKDIDGYGGIALPELICTMF  | 20 | 0.1   | 0.64 | 0.64 | 0.73  | 0.25 | -0.34 | 0.35 | -2   | 4.03  | 2169.89 | 0.97 | 0.43 | 0.03 |
| 1997 | KDIDGYGGIALPELICTMFH  | 20 | 0.06  | 0.61 | 0.61 | 0.38  | 0.32 | -0.27 | 0.4  | -1.5 | 4.54  | 2193.87 | 0.97 | 0.46 | 0.03 |
| 1998 | DIDGYGGIALPELICTMFHT  | 20 | 0.1   | 0.61 | 0.61 | 0.55  | 0.14 | -0.45 | 0.35 | -2.5 | 4.03  | 2166.8  | 0.86 | 0.52 | 0.05 |
| 1999 | IDGYGGIALPELICTMFHTS  | 20 | 0.12  | 0.6  | 0.6  | 0.68  | 0.14 | -0.58 | 0.35 | -1.5 | 4.36  | 2138.79 | 0.97 | 0.44 | 0.05 |
| 2000 | DGYGGIALPELICTMFHTSG  | 20 | 0.1   | 0.59 | 0.59 | 0.44  | 0.14 | -0.49 | 0.35 | -1.5 | 4.36  | 2082.68 | 0.86 | 0.32 | 0.07 |
| 2001 | GYGGIALPELICTMFHTSGY  | 20 | 0.13  | 0.59 | 0.59 | 0.55  | 0.14 | -0.75 | 0.35 | -0.5 | 5.25  | 2130.77 | 0.98 | 0.32 | 0.37 |
| 2002 | YGGIALPELICTMFHTSGYD  | 20 | 0.09  | 0.6  | 0.6  | 0.39  | 0.14 | -0.6  | 0.4  | -1.5 | 4.36  | 2188.8  | 0.98 | 0.32 | 0.10 |
| 2003 | GGIALPELICTMFHTSGYDT  | 20 | 0.08  | 0.59 | 0.59 | 0.42  | 0.14 | -0.51 | 0.4  | -1.5 | 4.36  | 2126.73 | 0.95 | 0.29 | 0.09 |
| 2004 | GIALPELICTMFHTSGYDTQ  | 20 | 0.04  | 0.59 | 0.59 | 0.26  | 0.2  | -0.5  | 0.5  | -1.5 | 4.36  | 2197.81 | 0.95 | 0.29 | 0.16 |
| 2005 | IALPELICTMFHTSGYDTQA  | 20 | 0.04  | 0.58 | 0.58 | 0.38  | 0.2  | -0.52 | 0.5  | -1.5 | 4.36  | 2211.83 | 0.93 | 0.27 | 0.04 |
| 2006 | ALPELICTMFHTSGYDTQAI  | 20 | 0.04  | 0.58 | 0.58 | 0.38  | 0.2  | -0.53 | 0.5  | -1.5 | 4.36  | 2211.83 | 0.80 | 0.27 | 0.03 |
| 2007 | LPELICTMFHTSGYDTQAIV  | 20 | 0.06  | 0.59 | 0.59 | 0.49  | 0.2  | -0.57 | 0.5  | -1.5 | 4.36  | 2239.89 | 0.93 | 0.29 | 0.03 |
| 2008 | PELICTMFHTSGYDTQAIVE  | 20 | 0     | 0.6  | 0.6  | 0.13  | 0.26 | -0.33 | 0.55 | -2.5 | 4.14  | 2255.84 | 0.87 | 0.30 | 0.03 |
| 2009 | ELICTMFHTSGYDTQAIVEN  | 20 | -0.03 | 0.62 | 0.62 | 0.04  | 0.26 | -0.32 | 0.65 | -2.5 | 4.14  | 2272.83 | 0.80 | 0.33 | 0.03 |
| 2010 | LICTMFHTSGYDTQAIVENN  | 20 | -0.03 | 0.62 | 0.62 | 0.03  | 0.2  | -0.47 | 0.7  | -1.5 | 4.36  | 2257.82 | 0.93 | 0.37 | 0.08 |
| 2011 | ICTMFHTSGYDTQAIVENNE  | 20 | -0.09 | 0.63 | 0.63 | -0.33 | 0.26 | -0.23 | 0.75 | -2.5 | 4.14  | 2273.77 | 0.93 | 0.34 | 0.17 |
| 2012 | CTMFHTSGYDTQAIVENNES  | 20 | -0.14 | 0.62 | 0.62 | -0.6  | 0.26 | -0.12 | 0.8  | -2.5 | 4.14  | 2247.68 | 0.94 | 0.32 | 0.07 |
| 2013 | TMFHTSGYDTQAIVENNEST  | 20 | -0.15 | 0.61 | 0.61 | -0.76 | 0.26 | -0.09 | 0.85 | -2.5 | 4.14  | 2245.65 | 0.93 | 0.35 | 0.05 |
| 2014 | MFHTSGYDTQAIVENNESTE  | 20 | -0.17 | 0.62 | 0.62 | -0.9  | 0.33 | 0.08  | 0.85 | -3.5 | 4     | 2273.66 | 0.93 | 0.33 | 0.04 |
| 2015 | FHTSGYDTQAIVENNESTEY  | 20 | -0.18 | 0.62 | 0.62 | -1.06 | 0.33 | 0.03  | 0.9  | -3.5 | 4     | 2305.64 | 0.94 | 0.33 | 0.04 |
| 2016 | HTSGYDTQAIVENNESTEY   | 20 | -0.21 | 0.62 | 0.62 | -1.21 | 0.33 | 0.16  | 0.9  | -3.5 | 4     | 2215.52 | 0.98 | 0.31 | 0.03 |
| 2017 | TSGYDTQAIVENNESTEYGL  | 20 | -0.16 | 0.64 | 0.64 | -0.86 | 0.25 | 0.09  | 0.85 | -4   | 3.51  | 2191.54 | 0.93 | 0.26 | 0.03 |
| 2018 | SGYDTQAIVENNESTEYGLF  | 20 | -0.12 | 0.65 | 0.65 | -0.69 | 0.25 | -0.01 | 0.8  | -4   | 3.51  | 2237.61 | 0.93 | 0.31 | 0.05 |
| 2019 | GYDTQAIVENNESTEYGLFQ  | 20 | -0.14 | 0.66 | 0.66 | -0.82 | 0.32 | -0.02 | 0.85 | -4   | 3.51  | 2278.67 | 0.83 | 0.30 | 0.05 |
| 2020 | YDTQAIVENNESTEYGLFQI  | 20 | -0.11 | 0.66 | 0.66 | -0.58 | 0.32 | -0.11 | 0.85 | -4   | 3.51  | 2334.78 | 0.93 | 0.36 | 0.06 |
| 2021 | DTQAIVENNESTEYGLFQIS  | 20 | -0.13 | 0.65 | 0.65 | -0.55 | 0.32 | 0.02  | 0.85 | -4   | 3.51  | 2258.68 | 0.94 | 0.39 | 0.08 |
| 2022 | TQAIVENNESTEYGLFQISN  | 20 | -0.12 | 0.65 | 0.65 | -0.56 | 0.32 | -0.12 | 0.9  | -3   | 3.68  | 2257.7  | 0.98 | 0.37 | 0.04 |
| 2023 | QAIVENNESTEYGLFQISNK  | 20 | -0.17 | 0.66 | 0.66 | -0.72 | 0.5  | 0.05  | 0.95 | -2   | 4.26  | 2284.77 | 0.98 | 0.35 | 0.04 |
| 2024 | AIVENNESTEYGLFQISNKL  | 20 | -0.11 | 0.65 | 0.65 | -0.35 | 0.44 | -0.05 | 0.85 | -2   | 4.26  | 2269.8  | 0.80 | 0.43 | 0.06 |
| 2025 | IVENNESTEYGLFQISNKLW  | 20 | -0.1  | 0.65 | 0.65 | -0.49 | 0.44 | -0.19 | 0.9  | -2   | 4.26  | 2384.94 | 0.94 | 0.40 | 0.06 |
| 2026 | VENNESTEYGLFQISNKLWC  | 20 | -0.14 | 0.65 | 0.65 | -0.58 | 0.44 | -0.15 | 0.9  | -2   | 4.26  | 2374.91 | 0.98 | 0.39 | 0.06 |
| 2027 | ENNESTEYGLFQISNKLWCK  | 20 | -0.22 | 0.65 | 0.65 | -0.99 | 0.62 | 0.07  | 1    | -1   | 4.79  | 2403.95 | 0.61 | 0.37 | 0.09 |
| 2028 | NNESTEYGLFQISNKLWCKS  | 20 | -0.2  | 0.64 | 0.64 | -0.85 | 0.56 | -0.06 | 1    | 0    | 6.45  | 2361.91 | 0.94 | 0.39 | 0.13 |
| 2029 | NESTEYGLFQISNKLWCKSS  | 20 | -0.18 | 0.63 | 0.63 | -0.72 | 0.56 | -0.06 | 0.95 | 0    | 6.45  | 2334.88 | 0.99 | 0.45 | 0.05 |
| 2030 | ESTEYGLFQISNKLWCKSSQ  | 20 | -0.18 | 0.62 | 0.62 | -0.72 | 0.62 | -0.06 | 0.95 | 0    | 6.45  | 2348.91 | 0.61 | 0.50 | 0.04 |
| 2031 | STEYGLFQISNKLWCKSSQV  | 20 | -0.13 | 0.62 | 0.62 | -0.34 | 0.56 | -0.29 | 0.9  | 1    | 8.51  | 2318.93 | 0.97 | 0.52 | 0.04 |
| 2032 | TEYGLFQISNKLWCKSSQVP  | 20 | -0.12 | 0.61 | 0.61 | -0.38 | 0.56 | -0.3  | 0.85 | 1    | 8.51  | 2328.97 | 0.99 | 0.52 | 0.04 |
| 2033 | EYGLFQISNKLWCKSSQVPQ  | 20 | -0.14 | 0.62 | 0.62 | -0.52 | 0.62 | -0.27 | 0.9  | 1    | 8.51  | 2356    | 0.61 | 0.52 | 0.09 |
| 2034 | YGLFQISNKLWCKSSQVPQS  | 20 | -0.12 | 0.61 | 0.61 | -0.38 | 0.55 | -0.4  | 0.9  | 2    | 9.25  | 2313.96 | 0.99 | 0.49 | 0.05 |
| 2035 | GLFQISNKLWCKSSQVPQSR  | 20 | -0.21 | 0.61 | 0.61 | -0.54 | 0.68 | -0.14 | 1.05 | 3    | 10.07 | 2306.97 | 0.98 | 0.48 | 0.61 |
| 2036 | LFQISNKLWCKSSQVPQSRN  | 20 | -0.25 | 0.62 | 0.62 | -0.69 | 0.68 | -0.13 | 1.15 | 3    | 10.07 | 2364.02 | 0.94 | 0.46 | 0.08 |
| 2037 | FQISNKLWCKSSQVPQSRNI  | 20 | -0.24 | 0.63 | 0.63 | -0.66 | 0.68 | -0.13 | 1.15 | 3    | 10.07 | 2364.02 | 0.61 | 0.44 | 0.07 |
| 2038 | QISNKLWCKSSQVPQSRNIC  | 20 | -0.27 | 0.62 | 0.62 | -0.68 | 0.68 | -0.05 | 1.15 | 3    | 9.53  | 2319.98 | 0.99 | 0.47 | 0.49 |
| 2039 | ISNKLWCKSSQVPQSRNICD  | 20 | -0.27 | 0.63 | 0.63 | -0.68 | 0.61 | 0.08  | 1.1  | 2    | 8.98  | 2306.93 | 0.97 | 0.48 | 0.14 |
| 2040 | SNKLWCKSSQVPQSRNICDI  | 20 | -0.27 | 0.63 | 0.63 | -0.68 | 0.61 | 0.08  | 1.1  | 2    | 8.98  | 2306.93 | 0.99 | 0.44 | 0.13 |
| 2041 | NKLWCKSSQVPQSRNICDIS  | 20 | -0.27 | 0.63 | 0.63 | -0.68 | 0.61 | 0.09  | 1.1  | 2    | 8.98  | 2306.93 | 0.99 | 0.49 | 0.25 |
| 2042 | KLWCKSSQVPQSRNICDISC  | 20 | -0.24 | 0.62 | 0.62 | -0.38 | 0.61 | 0.03  | 1    | 2    | 8.77  | 2295.96 | 0.99 | 0.44 | 0.82 |
| 2043 | LWCKSSQVPQSRNICDISCD  | 20 | -0.22 | 0.62 | 0.62 | -0.36 | 0.43 | 0.02  | 0.95 | 0    | 6.23  | 2282.87 | 0.97 | 0.43 | 0.41 |
| 2044 | WCKSSQVPQSRNICDISCDK  | 20 | -0.3  | 0.63 | 0.63 | -0.74 | 0.61 | 0.26  | 1.05 | 1    | 8.24  | 2297.88 | 0.97 | 0.40 | 0.66 |
| 2045 | CKSSQVPQSRNICDISCDKF  | 20 | -0.29 | 0.64 | 0.64 | -0.56 | 0.61 | 0.31  | 1    | 1    | 8.24  | 2258.84 | 0.86 | 0.41 | 0.22 |
| 2046 | KSSQVPQSRNICDISCDKFL  | 20 | -0.27 | 0.64 | 0.64 | -0.49 | 0.61 | 0.27  | 1    | 1    | 8.36  | 2268.87 | 0.99 | 0.47 | 0.34 |

|      |                        |    |       |      |      |       |      |       |      |      |       |         |      |      |      |
|------|------------------------|----|-------|------|------|-------|------|-------|------|------|-------|---------|------|------|------|
| 2047 | SSQVPQSRNICDISCDKFLD   | 20 | -0.25 | 0.64 | 0.64 | -0.47 | 0.43 | 0.27  | 0.95 | -1   | 4.43  | 2255.78 | 0.99 | 0.34 | 0.15 |
| 2048 | SQVPQSRNICDISCDKFLDD   | 20 | -0.27 | 0.65 | 0.65 | -0.6  | 0.43 | 0.41  | 0.95 | -2   | 4.14  | 2283.79 | 0.99 | 0.32 | 0.10 |
| 2049 | QVPQSRNICDISCDKFLDD    | 20 | -0.29 | 0.66 | 0.66 | -0.74 | 0.43 | 0.54  | 0.95 | -3   | 3.98  | 2311.8  | 0.99 | 0.32 | 0.06 |
| 2050 | VPQSRNICDISCDKFLDDDI   | 20 | -0.22 | 0.66 | 0.66 | -0.34 | 0.37 | 0.44  | 0.85 | -3   | 3.98  | 2296.83 | 0.98 | 0.32 | 0.08 |
| 2051 | PQSRNICDISCDKFLDDDDIT  | 20 | -0.26 | 0.66 | 0.66 | -0.58 | 0.37 | 0.49  | 0.9  | -3   | 3.98  | 2298.8  | 0.87 | 0.32 | 0.09 |
| 2052 | QSRNICDISCDKFLDDDDITD  | 20 | -0.29 | 0.68 | 0.68 | -0.68 | 0.37 | 0.65  | 0.95 | -4   | 3.86  | 2316.77 | 0.98 | 0.34 | 0.09 |
| 2053 | SRNICDISCDKFLDDDDITDD  | 20 | -0.29 | 0.68 | 0.68 | -0.68 | 0.31 | 0.78  | 0.9  | -5   | 3.77  | 2303.72 | 0.99 | 0.34 | 0.04 |
| 2054 | RNICDISCDKFLDDDDITDDI  | 20 | -0.24 | 0.69 | 0.69 | -0.42 | 0.31 | 0.68  | 0.85 | -5   | 3.77  | 2329.81 | 0.99 | 0.34 | 0.07 |
| 2055 | NICDISCDKFLDDDDITDDIM  | 20 | -0.14 | 0.69 | 0.69 | -0.1  | 0.18 | 0.46  | 0.65 | -6   | 3.5   | 2304.82 | 0.99 | 0.32 | 0.06 |
| 2056 | ICDISCDKFLDDDDITDDIMC  | 20 | -0.11 | 0.69 | 0.69 | 0.2   | 0.18 | 0.4   | 0.55 | -6   | 3.5   | 2293.85 | 0.99 | 0.33 | 0.20 |
| 2057 | CDISCDKFLDDDDITDDIMCA  | 20 | -0.13 | 0.68 | 0.68 | 0.07  | 0.18 | 0.47  | 0.55 | -6   | 3.5   | 2251.76 | 0.61 | 0.33 | 0.04 |
| 2058 | DISCDKFLDDDDITDDIMCAK  | 20 | -0.19 | 0.68 | 0.68 | -0.25 | 0.37 | 0.67  | 0.65 | -5   | 3.77  | 2276.8  | 0.61 | 0.33 | 0.04 |
| 2059 | ISCDKFLDDDDITDDIMCAKK  | 20 | -0.21 | 0.68 | 0.68 | -0.27 | 0.55 | 0.67  | 0.7  | -3   | 4.12  | 2289.89 | 0.99 | 0.34 | 0.29 |
| 2060 | SCDKFLDDDDITDDIMCAKKI  | 20 | -0.21 | 0.68 | 0.68 | -0.27 | 0.55 | 0.67  | 0.7  | -3   | 4.12  | 2289.89 | 0.98 | 0.35 | 0.29 |
| 2061 | CDKFLDDDDITDDIMCAKKIL  | 20 | -0.17 | 0.68 | 0.68 | -0.04 | 0.55 | 0.56  | 0.65 | -3   | 4.12  | 2315.98 | 0.80 | 0.38 | 0.27 |
| 2062 | DKFLDDDDITDDIMCAKKILD  | 20 | -0.21 | 0.68 | 0.68 | -0.34 | 0.55 | 0.76  | 0.7  | -4   | 4     | 2327.93 | 0.86 | 0.38 | 0.03 |
| 2063 | KFLDDDDITDDIMCAKKILDI  | 20 | -0.13 | 0.68 | 0.68 | 0.06  | 0.55 | 0.52  | 0.65 | -3   | 4.12  | 2326.01 | 0.98 | 0.47 | 0.04 |
| 2064 | FLDDDDITDDIMCAKKILDIK  | 20 | -0.13 | 0.68 | 0.68 | 0.06  | 0.55 | 0.53  | 0.65 | -3   | 4.12  | 2326.01 | 0.61 | 0.45 | 0.08 |
| 2065 | LDDDDITDDIMCAKKILDIKGI | 20 | -0.16 | 0.68 | 0.68 | -0.1  | 0.55 | 0.65  | 0.65 | -3   | 4.12  | 2235.89 | 0.99 | 0.38 | 0.05 |
| 2066 | DDDDITDDIMCAKKILDIKGI  | 20 | -0.15 | 0.69 | 0.69 | -0.06 | 0.55 | 0.65  | 0.65 | -3   | 4.12  | 2235.89 | 0.61 | 0.37 | 0.06 |
| 2067 | DDITDDIMCAKKILDIKID    | 20 | -0.15 | 0.69 | 0.69 | -0.06 | 0.55 | 0.65  | 0.65 | -3   | 4.12  | 2235.89 | 0.61 | 0.35 | 0.06 |
| 2068 | DITDDIMCAKKILDIKIDY    | 20 | -0.11 | 0.68 | 0.68 | 0.05  | 0.55 | 0.39  | 0.65 | -2   | 4.29  | 2283.98 | 0.61 | 0.36 | 0.05 |
| 2069 | ITDDIMCAKKILDIKIDYVW   | 20 | -0.05 | 0.67 | 0.67 | 0.17  | 0.55 | 0.07  | 0.65 | -1   | 4.58  | 2355.11 | 0.99 | 0.46 | 0.07 |
| 2070 | TDDIMCAKKILDIKIDYVWL   | 20 | -0.06 | 0.66 | 0.66 | 0.14  | 0.55 | 0.07  | 0.65 | -1   | 4.58  | 2355.11 | 0.93 | 0.46 | 0.04 |
| 2071 | DDIMCAKKILDIKIDYVWLA   | 20 | -0.04 | 0.66 | 0.66 | 0.27  | 0.55 | 0.06  | 0.6  | -1   | 4.58  | 2325.08 | 0.94 | 0.50 | 0.22 |
| 2072 | DIMCAKKILDIKIDYVWLAH   | 20 | -0.03 | 0.62 | 0.62 | 0.28  | 0.62 | -0.11 | 0.6  | 0.5  | 7.06  | 2347.14 | 0.94 | 0.51 | 0.84 |
| 2073 | IMCAKKILDIKIDYVWLAHK   | 20 | -0.05 | 0.62 | 0.62 | 0.26  | 0.81 | -0.11 | 0.65 | 2.5  | 9.1   | 2360.23 | 0.93 | 0.53 | 0.97 |
| 2074 | MCAKKILDIKIDYVWLAHKA   | 20 | -0.07 | 0.61 | 0.61 | 0.12  | 0.81 | -0.05 | 0.65 | 2.5  | 9.1   | 2318.14 | 0.93 | 0.56 | 0.98 |
| 2075 | CAKKILDIKIDYVWLAHKAL   | 20 | -0.06 | 0.6  | 0.6  | 0.22  | 0.81 | -0.07 | 0.65 | 2.5  | 9.1   | 2300.11 | 0.69 | 0.55 | 0.98 |
| 2076 | AKKILDIKIDYVWLAHKALC   | 20 | -0.06 | 0.6  | 0.6  | 0.22  | 0.81 | -0.07 | 0.65 | 2.5  | 9.1   | 2300.11 | 0.94 | 0.49 | 0.98 |
| 2077 | KKILDIKIDYVWLAHKALCT   | 20 | -0.08 | 0.6  | 0.6  | 0.09  | 0.81 | -0.07 | 0.7  | 2.5  | 9.1   | 2330.14 | 0.98 | 0.46 | 0.82 |
| 2078 | KILDIKIDYVWLAHKALCTE   | 20 | -0.05 | 0.6  | 0.6  | 0.11  | 0.69 | -0.07 | 0.65 | 0.5  | 7.06  | 2331.08 | 0.98 | 0.43 | 0.23 |
| 2079 | ILDIKIDYVWLAHKALCTEK   | 20 | -0.05 | 0.6  | 0.6  | 0.12  | 0.69 | -0.07 | 0.65 | 0.5  | 7.06  | 2331.08 | 0.93 | 0.45 | 0.35 |
| 2080 | LDIKIDYVWLAHKALCTEKL   | 20 | -0.06 | 0.59 | 0.59 | 0.08  | 0.69 | -0.07 | 0.65 | 0.5  | 7.06  | 2331.08 | 0.98 | 0.42 | 0.36 |
| 2081 | DIKIDYVWLAHKALCTEKL    | 20 | -0.12 | 0.6  | 0.6  | -0.29 | 0.75 | 0.17  | 0.7  | -0.5 | 5.5   | 2347.03 | 0.94 | 0.47 | 0.02 |
| 2082 | IKGIDYVWLAHKALCTEKL    | 20 | -0.12 | 0.59 | 0.59 | -0.29 | 0.81 | 0.03  | 0.75 | 0.5  | 7.06  | 2360.08 | 0.98 | 0.41 | 0.07 |
| 2083 | KGIDYVWLAHKALCTEKLQW   | 20 | -0.14 | 0.58 | 0.58 | -0.55 | 0.81 | -0.05 | 0.8  | 0.5  | 7.06  | 2433.13 | 0.98 | 0.43 | 0.20 |
| 2084 | GIDYVWLAHKALCTEKLQWL   | 20 | -0.06 | 0.58 | 0.58 | -0.17 | 0.63 | -0.29 | 0.7  | -0.5 | 5.46  | 2418.12 | 0.83 | 0.41 | 0.36 |
| 2085 | IDYVWLAHKALCTEKLQWLC   | 20 | -0.06 | 0.57 | 0.57 | -0.03 | 0.63 | -0.34 | 0.7  | -0.5 | 5.46  | 2464.2  | 0.93 | 0.41 | 0.51 |
| 2086 | DYVWLAHKALCTEKLQWLC    | 20 | -0.13 | 0.57 | 0.57 | -0.43 | 0.69 | -0.1  | 0.75 | -1.5 | 4.84  | 2480.15 | 0.94 | 0.39 | 0.38 |
| 2087 | YVWLAHKALCTEKLQWLC     | 20 | -0.15 | 0.57 | 0.57 | -0.45 | 0.88 | -0.1  | 0.8  | 0.5  | 7.04  | 2493.24 | 0.99 | 0.40 | 0.56 |
| 2088 | WLAHKALCTEKLQWLC       | 20 | -0.12 | 0.56 | 0.56 | -0.19 | 0.88 | -0.08 | 0.75 | 0.5  | 7.04  | 2443.23 | 0.99 | 0.36 | 0.87 |
| 2089 | MRFFVPLFLVGFILPAILAKQ  | 21 | 0.21  | 0.62 | 0.62 | 1.61  | 0.35 | -0.95 | 0.38 | 2    | 11.01 | 2421.4  | 0.93 | 0.66 | 0.97 |
| 2090 | RFFVPLFLVGFILPAILAKQF  | 21 | 0.22  | 0.61 | 0.61 | 1.65  | 0.35 | -1    | 0.38 | 2    | 11.01 | 2437.38 | 0.98 | 0.67 | 0.99 |
| 2091 | FFVPLFLVGFILPAILAKQFT  | 21 | 0.3   | 0.61 | 0.61 | 1.83  | 0.23 | -1.17 | 0.24 | 1    | 9.11  | 2382.3  | 0.94 | 0.61 | 0.94 |
| 2092 | FVPLFLVGFILPAILAKQFTK  | 21 | 0.22  | 0.61 | 0.61 | 1.51  | 0.41 | -0.9  | 0.33 | 2    | 10.02 | 2363.3  | 0.80 | 0.61 | 0.98 |
| 2093 | VPLFLVGFILPAILAKQFTKC  | 21 | 0.19  | 0.6  | 0.6  | 1.5   | 0.41 | -0.83 | 0.33 | 2    | 9.36  | 2319.26 | 0.93 | 0.57 | 0.98 |
| 2094 | PLFLVGFILPAILAKQFTKCE  | 21 | 0.13  | 0.6  | 0.6  | 1.13  | 0.47 | -0.62 | 0.38 | 1    | 8.54  | 2349.24 | 0.93 | 0.57 | 0.95 |
| 2095 | LFLVGFILPAILAKQFTKCEL  | 21 | 0.16  | 0.61 | 0.61 | 1.39  | 0.47 | -0.7  | 0.38 | 1    | 8.54  | 2365.29 | 0.93 | 0.51 | 0.72 |
| 2096 | FLVGFILPAILAKQFTKCELS  | 21 | 0.13  | 0.61 | 0.61 | 1.17  | 0.47 | -0.6  | 0.43 | 1    | 8.54  | 2339.2  | 0.94 | 0.46 | 0.91 |
| 2097 | LVGFILPAILAKQFTKCELSQ  | 21 | 0.06  | 0.61 | 0.61 | 0.87  | 0.53 | -0.48 | 0.52 | 1    | 8.54  | 2320.16 | 0.93 | 0.46 | 0.30 |
| 2098 | VGILPAILAKQFTKCELSQL   | 21 | 0.06  | 0.61 | 0.61 | 0.87  | 0.53 | -0.48 | 0.52 | 1    | 8.54  | 2320.16 | 0.93 | 0.47 | 0.48 |
| 2099 | GILPAILAKQFTKCELSQLL   | 21 | 0.06  | 0.6  | 0.6  | 0.85  | 0.53 | -0.49 | 0.52 | 1    | 8.54  | 2334.19 | 0.83 | 0.46 | 0.89 |
| 2100 | ILPAILAKQFTKCELSQLLL   | 21 | 0     | 0.6  | 0.6  | 0.69  | 0.7  | -0.35 | 0.62 | 2    | 9.25  | 2405.31 | 0.93 | 0.46 | 0.92 |
| 2101 | LFPAILAKQFTKCELSQLLKD  | 21 | -0.07 | 0.6  | 0.6  | 0.3   | 0.7  | -0.12 | 0.67 | 1    | 8.51  | 2407.23 | 0.93 | 0.44 | 0.73 |
| 2102 | FPAILAKQFTKCELSQLLKI   | 21 | -0.06 | 0.61 | 0.61 | 0.34  | 0.7  | -0.12 | 0.67 | 1    | 8.51  | 2407.23 | 0.94 | 0.40 | 0.65 |
| 2103 | PAILAKQFTKCELSQLLKDID  | 21 | -0.12 | 0.61 | 0.61 | 0.04  | 0.7  | 0.14  | 0.71 | 0    | 6.43  | 2375.14 | 0.93 | 0.42 | 0.54 |
| 2104 | AILAKQFTKCELSQLLKDIDG  | 21 | -0.11 | 0.63 | 0.63 | 0.1   | 0.7  | 0.14  | 0.71 | 0    | 6.43  | 2335.08 | 0.80 | 0.40 | 0.15 |
| 2105 | ILAKQFTKCELSQLLKDIDGY  | 21 | -0.12 | 0.64 | 0.64 | -0.05 | 0.7  | 0.06  | 0.76 | 0    | 6.43  | 2427.18 | 0.98 | 0.36 | 0.05 |
| 2106 | LAKQFTKCELSQLLKDIDGYG  | 21 | -0.15 | 0.64 | 0.64 | -0.29 | 0.7  | 0.14  | 0.76 | 0    | 6.43  | 2371.07 | 0.99 | 0.35 | 0.29 |
| 2107 | AKQFTKCELSQLLKDIDGYGG  | 21 | -0.16 | 0.64 | 0.64 | -0.49 | 0.7  | 0.23  | 0.76 | 0    | 6.43  | 2314.96 | 0.61 | 0.31 | 0.05 |
| 2108 | KQFTKCELSQLLKDIDGYGGI  | 21 | -0.14 | 0.65 | 0.65 | -0.36 | 0.7  | 0.17  | 0.76 | 0    | 6.43  | 2357.05 | 0.99 | 0.33 | 0.04 |
| 2109 | QFTKCELSQLLKDIDGYGGIA  | 21 | -0.08 | 0.65 | 0.65 | -0.09 | 0.53 | 0     | 0.67 | -1   | 4.56  | 2299.95 | 0.94 | 0.32 | 0.03 |
| 2110 | FTKCELSQLLKDIDGYGGIAL  | 21 | -0.02 | 0.64 | 0.64 | 0.26  | 0.47 | -0.1  | 0.57 | -1   | 4.56  | 2284.98 | 0.61 | 0.33 | 0.22 |

|      |                        |    |       |      |      |       |      |       |      |      |       |         |      |      |      |
|------|------------------------|----|-------|------|------|-------|------|-------|------|------|-------|---------|------|------|------|
| 2111 | TKCELSQLLKIDIDYGGIALP  | 21 | -0.05 | 0.62 | 0.62 | 0.05  | 0.47 | 0.02  | 0.57 | -1   | 4.56  | 2234.92 | 0.99 | 0.40 | 0.06 |
| 2112 | KCELSQLLKIDIDYGGIALPE  | 21 | -0.07 | 0.63 | 0.63 | -0.08 | 0.53 | 0.19  | 0.57 | -2   | 4.32  | 2262.93 | 0.99 | 0.38 | 0.09 |
| 2113 | CELSQLLKIDIDYGGIALPEL  | 21 | 0     | 0.62 | 0.62 | 0.29  | 0.36 | -0.04 | 0.48 | -3   | 3.92  | 2247.92 | 0.61 | 0.39 | 0.03 |
| 2114 | ELSQLLKIDIDYGGIALPELI  | 21 | 0.04  | 0.63 | 0.63 | 0.38  | 0.36 | -0.08 | 0.48 | -3   | 3.92  | 2257.95 | 0.61 | 0.39 | 0.03 |
| 2115 | LSQLLKIDIDYGGIALPELIC  | 21 | 0.07  | 0.62 | 0.62 | 0.67  | 0.29 | -0.27 | 0.43 | -2   | 4.03  | 2231.97 | 0.99 | 0.39 | 0.07 |
| 2116 | SQLLKIDIDYGGIALPELICT  | 21 | 0.04  | 0.62 | 0.62 | 0.45  | 0.29 | -0.2  | 0.48 | -2   | 4.03  | 2219.91 | 0.99 | 0.35 | 0.04 |
| 2117 | QLLKIDIDYGGIALPELICTM  | 21 | 0.06  | 0.63 | 0.63 | 0.58  | 0.29 | -0.28 | 0.43 | -2   | 4.03  | 2264.03 | 0.94 | 0.36 | 0.04 |
| 2118 | LLKIDIDYGGIALPELICTMF  | 21 | 0.12  | 0.64 | 0.64 | 0.88  | 0.24 | -0.41 | 0.33 | -2   | 4.03  | 2283.07 | 0.97 | 0.41 | 0.04 |
| 2119 | LKIDIDYGGIALPELICTMFH  | 21 | 0.08  | 0.61 | 0.61 | 0.55  | 0.3  | -0.35 | 0.38 | -1.5 | 4.54  | 2307.05 | 0.97 | 0.45 | 0.03 |
| 2120 | KDIDYGGIALPELICTMFHT   | 21 | 0.04  | 0.61 | 0.61 | 0.33  | 0.3  | -0.28 | 0.43 | -1.5 | 4.54  | 2294.99 | 0.97 | 0.47 | 0.03 |
| 2121 | DIDYGGIALPELICTMFHTS   | 21 | 0.08  | 0.6  | 0.6  | 0.48  | 0.13 | -0.41 | 0.38 | -2.5 | 4.03  | 2253.89 | 0.86 | 0.43 | 0.06 |
| 2122 | IDYGGIALPELICTMFHTSG   | 21 | 0.13  | 0.6  | 0.6  | 0.63  | 0.13 | -0.55 | 0.33 | -1.5 | 4.36  | 2195.86 | 0.97 | 0.34 | 0.05 |
| 2123 | DYGGIALPELICTMFHTSGY   | 21 | 0.09  | 0.6  | 0.6  | 0.35  | 0.13 | -0.58 | 0.38 | -1.5 | 4.36  | 2245.87 | 0.94 | 0.33 | 0.08 |
| 2124 | YGGIALPELICTMFHTSGYD   | 21 | 0.09  | 0.6  | 0.6  | 0.35  | 0.13 | -0.58 | 0.38 | -1.5 | 4.36  | 2245.87 | 0.83 | 0.33 | 0.21 |
| 2125 | YGIALPELICTMFHTSGYDT   | 21 | 0.08  | 0.59 | 0.59 | 0.34  | 0.13 | -0.6  | 0.43 | -1.5 | 4.36  | 2289.92 | 0.93 | 0.29 | 0.11 |
| 2126 | GGIALPELICTMFHTSGYDTQ  | 21 | 0.04  | 0.59 | 0.59 | 0.23  | 0.19 | -0.48 | 0.48 | -1.5 | 4.36  | 2254.88 | 0.83 | 0.29 | 0.18 |
| 2127 | IALPELICTMFHTSGYDTQAI  | 21 | 0.05  | 0.58 | 0.58 | 0.34  | 0.19 | -0.5  | 0.48 | -1.5 | 4.36  | 2268.9  | 0.95 | 0.28 | 0.19 |
| 2128 | IALPELICTMFHTSGYDTQAI  | 21 | 0.07  | 0.58 | 0.58 | 0.57  | 0.19 | -0.59 | 0.48 | -1.5 | 4.36  | 2325.01 | 0.93 | 0.26 | 0.04 |
| 2129 | ALPELICTMFHTSGYDTQAI   | 21 | 0.06  | 0.58 | 0.58 | 0.56  | 0.19 | -0.57 | 0.48 | -1.5 | 4.36  | 2310.98 | 0.80 | 0.28 | 0.03 |
| 2130 | LPELICTMFHTSGYDTQAIVE  | 21 | 0.02  | 0.59 | 0.59 | 0.3   | 0.25 | -0.4  | 0.52 | -2.5 | 4.14  | 2369.02 | 0.93 | 0.32 | 0.03 |
| 2131 | PELICTMFHTSGYDTQAIVEN  | 21 | -0.03 | 0.6  | 0.6  | -0.04 | 0.25 | -0.31 | 0.62 | -2.5 | 4.14  | 2369.96 | 0.87 | 0.31 | 0.04 |
| 2132 | ELICTMFHTSGYDTQAIVENN  | 21 | -0.06 | 0.62 | 0.62 | -0.13 | 0.25 | -0.3  | 0.71 | -2.5 | 4.14  | 2386.95 | 0.94 | 0.33 | 0.03 |
| 2133 | LICTMFHTSGYDTQAIVENNE  | 21 | -0.06 | 0.62 | 0.62 | -0.13 | 0.25 | -0.3  | 0.71 | -2.5 | 4.14  | 2386.95 | 0.93 | 0.34 | 0.07 |
| 2134 | ICTMFHTSGYDTQAIVENNES  | 21 | -0.1  | 0.62 | 0.62 | -0.35 | 0.25 | -0.2  | 0.76 | -2.5 | 4.14  | 2360.86 | 0.93 | 0.33 | 0.07 |
| 2135 | CTMFHTSGYDTQAIVENNEST  | 21 | -0.14 | 0.61 | 0.61 | -0.6  | 0.25 | -0.13 | 0.81 | -2.5 | 4.14  | 2348.8  | 0.94 | 0.34 | 0.08 |
| 2136 | TMFHTSGYDTQAIVENNESTE  | 21 | -0.17 | 0.62 | 0.62 | -0.89 | 0.31 | 0.06  | 0.86 | -3.5 | 4     | 2374.78 | 0.93 | 0.35 | 0.03 |
| 2137 | MFHTSGYDTQAIVENNESTEY  | 21 | -0.16 | 0.63 | 0.63 | -0.91 | 0.31 | -0.03 | 0.86 | -3.5 | 4     | 2436.85 | 0.93 | 0.34 | 0.04 |
| 2138 | FHTSGYDTQAIVENNESTEYGL | 21 | -0.17 | 0.62 | 0.62 | -1.02 | 0.31 | 0.03  | 0.86 | -3.5 | 4     | 2362.71 | 0.94 | 0.36 | 0.03 |
| 2139 | HTSGYDTQAIVENNESTEYGL  | 21 | -0.17 | 0.61 | 0.61 | -0.98 | 0.31 | 0.06  | 0.86 | -3.5 | 4     | 2328.7  | 0.93 | 0.30 | 0.03 |
| 2140 | TSGYDTQAIVENNESTEYGLF  | 21 | -0.12 | 0.65 | 0.65 | -0.69 | 0.24 | -0.03 | 0.81 | -4   | 3.51  | 2338.73 | 0.93 | 0.29 | 0.04 |
| 2141 | SGYDTQAIVENNESTEYGLFQ  | 21 | -0.15 | 0.65 | 0.65 | -0.82 | 0.3  | 0     | 0.86 | -4   | 3.51  | 2365.76 | 0.93 | 0.30 | 0.04 |
| 2142 | GYDTQAIVENNESTEYGLFQI  | 21 | -0.1  | 0.66 | 0.66 | -0.57 | 0.3  | -0.1  | 0.81 | -4   | 3.51  | 2391.85 | 0.83 | 0.34 | 0.04 |
| 2143 | YDTQAIVENNESTEYGLFQIS  | 21 | -0.12 | 0.65 | 0.65 | -0.59 | 0.3  | -0.09 | 0.86 | -4   | 3.51  | 2421.87 | 0.98 | 0.39 | 0.08 |
| 2144 | DTQAIVENNESTEYGLFQISN  | 21 | -0.15 | 0.66 | 0.66 | -0.7  | 0.3  | 0.03  | 0.9  | -4   | 3.51  | 2372.8  | 0.94 | 0.37 | 0.05 |
| 2145 | TQAIVENNESTEYGLFQISNKL | 21 | -0.17 | 0.65 | 0.65 | -0.71 | 0.48 | 0.03  | 0.95 | -2   | 4.26  | 2385.89 | 0.98 | 0.35 | 0.06 |
| 2146 | QAIVENNESTEYGLFQISNKL  | 21 | -0.14 | 0.65 | 0.65 | -0.5  | 0.48 | -0.04 | 0.9  | -2   | 4.26  | 2397.95 | 0.98 | 0.38 | 0.07 |
| 2147 | AIVENNESTEYGLFQISNKLW  | 21 | -0.09 | 0.64 | 0.64 | -0.38 | 0.42 | -0.21 | 0.86 | -2   | 4.26  | 2456.03 | 0.80 | 0.42 | 0.06 |
| 2148 | IVENNESTEYGLFQISNKLWC  | 21 | -0.1  | 0.65 | 0.65 | -0.34 | 0.42 | -0.23 | 0.86 | -2   | 4.26  | 2488.09 | 0.87 | 0.41 | 0.08 |
| 2149 | VENNESTEYGLFQISNKLWCK  | 21 | -0.18 | 0.65 | 0.65 | -0.74 | 0.59 | 0     | 0.95 | -1   | 4.79  | 2503.1  | 0.98 | 0.38 | 0.08 |
| 2150 | ENNESTEYGLFQISNKLWCKS  | 21 | -0.22 | 0.64 | 0.64 | -0.98 | 0.59 | 0.08  | 1    | -1   | 4.79  | 2491.04 | 0.86 | 0.39 | 0.05 |
| 2151 | NNESTEYGLFQISNKLWCKSS  | 21 | -0.2  | 0.63 | 0.63 | -0.85 | 0.53 | -0.05 | 1    | 0    | 6.45  | 2449    | 0.94 | 0.42 | 0.04 |
| 2152 | NESTEYGLFQISNKLWCKSSQ  | 21 | -0.21 | 0.63 | 0.63 | -0.85 | 0.59 | -0.05 | 1    | 0    | 6.45  | 2463.03 | 0.93 | 0.44 | 0.03 |
| 2153 | ESTEYGLFQISNKLWCKSSQP  | 21 | -0.15 | 0.63 | 0.63 | -0.49 | 0.59 | -0.13 | 0.9  | 0    | 6.45  | 2448.06 | 0.61 | 0.50 | 0.04 |
| 2154 | STEYGLFQISNKLWCKSSQVP  | 21 | -0.12 | 0.61 | 0.61 | -0.4  | 0.53 | -0.27 | 0.86 | 1    | 8.51  | 2416.06 | 0.99 | 0.50 | 0.05 |
| 2155 | TEYGLFQISNKLWCKSSQVPQ  | 21 | -0.14 | 0.62 | 0.62 | -0.52 | 0.59 | -0.28 | 0.9  | 1    | 8.51  | 2457.12 | 0.99 | 0.49 | 0.04 |
| 2156 | EYGLFQISNKLWCKSSQVPQSR | 21 | -0.15 | 0.62 | 0.62 | -0.53 | 0.59 | -0.24 | 0.9  | 1    | 8.51  | 2443.09 | 0.61 | 0.48 | 0.07 |
| 2157 | YGLFQISNKLWCKSSQVPQSR  | 21 | -0.2  | 0.62 | 0.62 | -0.58 | 0.64 | -0.24 | 1.05 | 3    | 9.8   | 2470.16 | 0.99 | 0.47 | 0.08 |
| 2158 | GLFQISNKLWCKSSQVPQSRN  | 21 | -0.23 | 0.62 | 0.62 | -0.68 | 0.64 | -0.12 | 1.1  | 3    | 10.07 | 2421.09 | 0.93 | 0.45 | 0.56 |
| 2159 | LFQISNKLWCKSSQVPQSRN   | 21 | -0.21 | 0.62 | 0.62 | -0.45 | 0.64 | -0.21 | 1.1  | 3    | 10.07 | 2477.2  | 0.94 | 0.41 | 0.10 |
| 2160 | FQISNKLWCKSSQVPQSRNIC  | 21 | -0.23 | 0.63 | 0.63 | -0.51 | 0.64 | -0.17 | 1.1  | 3    | 9.53  | 2467.17 | 0.61 | 0.43 | 0.53 |
| 2161 | QISNKLWCKSSQVPQSRNICD  | 21 | -0.29 | 0.63 | 0.63 | -0.81 | 0.64 | 0.09  | 1.14 | 2    | 8.98  | 2435.08 | 0.99 | 0.47 | 0.12 |
| 2162 | ISNKLWCKSSQVPQSRNICDI  | 21 | -0.23 | 0.63 | 0.63 | -0.43 | 0.59 | 0     | 1.05 | 2    | 8.98  | 2420.11 | 0.97 | 0.47 | 0.12 |
| 2163 | SNKLWCKSSQVPQSRNICDIS  | 21 | -0.27 | 0.62 | 0.62 | -0.68 | 0.59 | 0.1   | 1.1  | 2    | 8.98  | 2394.02 | 0.99 | 0.47 | 0.11 |
| 2164 | NKLWCKSSQVPQSRNICDISC  | 21 | -0.26 | 0.63 | 0.63 | -0.52 | 0.59 | 0.03  | 1.05 | 2    | 8.77  | 2410.08 | 0.99 | 0.45 | 0.76 |
| 2165 | KLWCKSSQVPQSRNICDISCD  | 21 | -0.26 | 0.63 | 0.63 | -0.52 | 0.59 | 0.17  | 1    | 1    | 8.24  | 2411.06 | 0.99 | 0.42 | 0.69 |
| 2166 | LWCKSSQVPQSRNICDISCDK  | 21 | -0.26 | 0.63 | 0.63 | -0.52 | 0.59 | 0.17  | 1    | 1    | 8.24  | 2411.06 | 0.97 | 0.38 | 0.61 |
| 2167 | WCKSSQVPQSRNICDISCDKF  | 21 | -0.26 | 0.63 | 0.63 | -0.57 | 0.59 | 0.13  | 1    | 1    | 8.24  | 2445.07 | 0.99 | 0.39 | 0.71 |
| 2168 | CKSSQVPQSRNICDISCDKFL  | 21 | -0.25 | 0.64 | 0.64 | -0.35 | 0.59 | 0.21  | 0.95 | 1    | 8.24  | 2372.02 | 0.86 | 0.40 | 0.52 |
| 2169 | KSSQVPQSRNICDISCDKFLD  | 21 | -0.29 | 0.64 | 0.64 | -0.63 | 0.59 | 0.4   | 1    | 0    | 6.33  | 2383.97 | 0.99 | 0.32 | 0.14 |
| 2170 | SSQVPQSRNICDISCDKFLDD  | 21 | -0.27 | 0.65 | 0.65 | -0.61 | 0.41 | 0.4   | 0.95 | -2   | 4.14  | 2370.88 | 0.99 | 0.29 | 0.10 |
| 2171 | SQVPQSRNICDISCDKFLDDDD | 21 | -0.29 | 0.66 | 0.66 | -0.74 | 0.41 | 0.53  | 0.95 | -3   | 3.98  | 2398.89 | 0.99 | 0.30 | 0.06 |
| 2172 | QVPQSRNICDISCDKFLDDDDI | 21 | -0.24 | 0.67 | 0.67 | -0.49 | 0.41 | 0.43  | 0.9  | -3   | 3.98  | 2424.98 | 0.99 | 0.31 | 0.07 |
| 2173 | VPQSRNICDISCDKFLDDDDIT | 21 | -0.22 | 0.66 | 0.66 | -0.36 | 0.35 | 0.4   | 0.86 | -3   | 3.98  | 2397.95 | 0.98 | 0.30 | 0.06 |
| 2174 | PQSRNICDISCDKFLDDDDITD | 21 | -0.28 | 0.66 | 0.66 | -0.72 | 0.35 | 0.61  | 0.9  | -4   | 3.86  | 2413.9  | 0.87 | 0.27 | 0.10 |

|      |                        |    |       |      |      |       |      |       |      |      |       |         |      |      |      |
|------|------------------------|----|-------|------|------|-------|------|-------|------|------|-------|---------|------|------|------|
| 2175 | QSRNICDISCDKFLDDDDITDD | 21 | -0.31 | 0.68 | 0.68 | -0.81 | 0.35 | 0.76  | 0.95 | -5   | 3.77  | 2431.87 | 0.99 | 0.32 | 0.08 |
| 2176 | SRNICDISCDKFLDDDDITDDI | 21 | -0.24 | 0.68 | 0.68 | -0.43 | 0.29 | 0.66  | 0.86 | -5   | 3.77  | 2416.9  | 0.99 | 0.32 | 0.07 |
| 2177 | RNICDISCDKFLDDDDITDDIM | 21 | -0.22 | 0.69 | 0.69 | -0.3  | 0.29 | 0.59  | 0.81 | -5   | 3.77  | 2461.02 | 0.99 | 0.30 | 0.08 |
| 2178 | NICDISCDKFLDDDDITDDIMC | 21 | -0.13 | 0.69 | 0.69 | 0.03  | 0.17 | 0.4   | 0.62 | -6   | 3.5   | 2407.97 | 0.99 | 0.31 | 0.16 |
| 2179 | ICDISCDKFLDDDDITDDIMCA | 21 | -0.09 | 0.68 | 0.68 | 0.28  | 0.17 | 0.36  | 0.52 | -6   | 3.5   | 2364.94 | 0.98 | 0.31 | 0.08 |
| 2180 | CDISCDKFLDDDDITDDIMCAK | 21 | -0.18 | 0.68 | 0.68 | -0.12 | 0.35 | 0.59  | 0.62 | -5   | 3.77  | 2379.95 | 0.61 | 0.30 | 0.04 |
| 2181 | DISCDKFLDDDDITDDIMCAKK | 21 | -0.23 | 0.68 | 0.68 | -0.42 | 0.52 | 0.78  | 0.71 | -4   | 4     | 2404.99 | 0.61 | 0.32 | 0.14 |
| 2182 | ISCDKFLDDDDITDDIMCAKKI | 21 | -0.16 | 0.68 | 0.68 | -0.04 | 0.52 | 0.55  | 0.67 | -3   | 4.12  | 2403.07 | 0.99 | 0.33 | 0.30 |
| 2183 | SCDKFLDDDDITDDIMCAKKIL | 21 | -0.17 | 0.67 | 0.67 | -0.08 | 0.52 | 0.55  | 0.67 | -3   | 4.12  | 2403.07 | 0.98 | 0.37 | 0.42 |
| 2184 | CDKFLDDDDITDDIMCAKKILD | 21 | -0.19 | 0.68 | 0.68 | -0.2  | 0.52 | 0.68  | 0.67 | -4   | 4     | 2431.08 | 0.80 | 0.37 | 0.04 |
| 2185 | DKFLDDDDITDDIMCAKKILDI | 21 | -0.16 | 0.68 | 0.68 | -0.11 | 0.52 | 0.64  | 0.67 | -4   | 4     | 2441.11 | 0.80 | 0.37 | 0.03 |
| 2186 | KFLDDDDITDDIMCAKKILDIK | 21 | -0.18 | 0.68 | 0.68 | -0.13 | 0.7  | 0.64  | 0.71 | -2   | 4.4   | 2454.2  | 0.99 | 0.44 | 0.06 |
| 2187 | FLDDDDITDDIMCAKKILDIKG | 21 | -0.12 | 0.68 | 0.68 | 0.04  | 0.52 | 0.5   | 0.62 | -3   | 4.12  | 2383.08 | 0.61 | 0.43 | 0.11 |
| 2188 | LDDDDITDDIMCAKKILDIKGI | 21 | -0.11 | 0.68 | 0.68 | 0.12  | 0.52 | 0.53  | 0.62 | -3   | 4.12  | 2349.07 | 0.99 | 0.37 | 0.05 |
| 2189 | DDDDITDDIMCAKKILDIKIGD | 21 | -0.17 | 0.69 | 0.69 | -0.23 | 0.52 | 0.76  | 0.67 | -4   | 4     | 2350.99 | 0.61 | 0.35 | 0.05 |
| 2190 | DDITDDIMCAKKILDIKIGIDY | 21 | -0.14 | 0.69 | 0.69 | -0.12 | 0.52 | 0.51  | 0.67 | -3   | 4.12  | 2399.08 | 0.61 | 0.36 | 0.04 |
| 2191 | DITDDIMCAKKILDIKIGIDYW | 21 | -0.09 | 0.68 | 0.68 | 0     | 0.52 | 0.2   | 0.67 | -2   | 4.29  | 2470.21 | 0.80 | 0.46 | 0.05 |
| 2192 | ITDDIMCAKKILDIKIGIDYW  | 21 | -0.03 | 0.67 | 0.67 | 0.35  | 0.52 | -0.02 | 0.62 | -1   | 4.58  | 2468.29 | 0.93 | 0.47 | 0.06 |
| 2193 | TDDIMCAKKILDIKIGIDYWLA | 21 | -0.05 | 0.66 | 0.66 | 0.22  | 0.52 | 0.04  | 0.62 | -1   | 4.58  | 2426.2  | 0.98 | 0.51 | 0.07 |
| 2194 | DDIMCAKKILDIKIGIDYWLAH | 21 | -0.06 | 0.63 | 0.63 | 0.1   | 0.59 | 0.03  | 0.62 | -0.5 | 5.37  | 2462.24 | 0.94 | 0.54 | 0.12 |
| 2195 | DIMCAKKILDIKIGIDYWLAHK | 21 | -0.08 | 0.63 | 0.63 | 0.08  | 0.77 | 0.03  | 0.67 | 1.5  | 8.46  | 2475.33 | 0.94 | 0.54 | 0.93 |
| 2196 | IMCAKKILDIKIGIDYWLAHKA | 21 | -0.03 | 0.62 | 0.62 | 0.33  | 0.77 | -0.13 | 0.62 | 2.5  | 9.1   | 2431.32 | 0.93 | 0.59 | 0.98 |
| 2197 | MCAKKILDIKIGIDYWLAHKAL | 21 | -0.04 | 0.61 | 0.61 | 0.3   | 0.77 | -0.13 | 0.62 | 2.5  | 9.1   | 2431.32 | 0.93 | 0.58 | 0.98 |
| 2198 | CAKKILDIKIGIDYWLAHKALC | 21 | -0.05 | 0.6  | 0.6  | 0.33  | 0.77 | -0.12 | 0.62 | 2.5  | 8.87  | 2403.26 | 0.69 | 0.51 | 0.98 |
| 2199 | AKKILDIKIGIDYWLAHKALCT | 21 | -0.06 | 0.6  | 0.6  | 0.18  | 0.77 | -0.09 | 0.67 | 2.5  | 9.1   | 2401.23 | 0.94 | 0.54 | 0.91 |
| 2200 | KKILDIKIGIDYWLAHKALCTE | 21 | -0.1  | 0.6  | 0.6  | -0.08 | 0.83 | 0.08  | 0.71 | 1.5  | 8.46  | 2459.27 | 0.98 | 0.49 | 0.56 |
| 2201 | KILDIKIGIDYWLAHKALCTEK | 21 | -0.1  | 0.6  | 0.6  | -0.08 | 0.83 | 0.08  | 0.71 | 1.5  | 8.46  | 2459.27 | 0.98 | 0.49 | 0.48 |
| 2202 | ILDIGIDYWLAHKALCTEKL   | 21 | -0.03 | 0.6  | 0.6  | 0.29  | 0.65 | -0.15 | 0.62 | 0.5  | 7.06  | 2444.26 | 0.93 | 0.50 | 0.32 |
| 2203 | LDIGIDYWLAHKALCTEKLE   | 21 | -0.09 | 0.6  | 0.6  | -0.09 | 0.71 | 0.08  | 0.67 | -0.5 | 5.5   | 2460.21 | 0.98 | 0.47 | 0.03 |
| 2204 | DIKIGIDYWLAHKALCTEKLEQ | 21 | -0.15 | 0.6  | 0.6  | -0.44 | 0.77 | 0.17  | 0.76 | -0.5 | 5.5   | 2475.18 | 0.94 | 0.46 | 0.03 |
| 2205 | IKGIDYWLAHKALCTEKLEQW  | 21 | -0.1  | 0.59 | 0.59 | -0.31 | 0.77 | -0.13 | 0.76 | 0.5  | 7.06  | 2546.31 | 0.93 | 0.46 | 0.17 |
| 2206 | KGIDYWLAHKALCTEKLEQWL  | 21 | -0.11 | 0.58 | 0.58 | -0.35 | 0.77 | -0.13 | 0.76 | 0.5  | 7.06  | 2546.31 | 0.98 | 0.47 | 0.41 |
| 2207 | GIDYWLAHKALCTEKLEQWLC  | 21 | -0.05 | 0.58 | 0.58 | -0.04 | 0.6  | -0.32 | 0.67 | -0.5 | 5.46  | 2521.27 | 0.83 | 0.43 | 0.45 |
| 2208 | IDYWLAHKALCTEKLEQWLC   | 21 | -0.09 | 0.58 | 0.58 | -0.19 | 0.66 | -0.18 | 0.71 | -1.5 | 4.84  | 2593.33 | 0.93 | 0.41 | 0.14 |
| 2209 | DYWLAHKALCTEKLEQWLC    | 21 | -0.18 | 0.58 | 0.58 | -0.59 | 0.83 | 0.05  | 0.81 | -0.5 | 5.54  | 2608.34 | 0.86 | 0.41 | 0.24 |
| 2210 | YWLAKALCTEKLEQWLC      | 21 | -0.12 | 0.57 | 0.57 | -0.24 | 0.83 | -0.18 | 0.76 | 0.5  | 7.04  | 2606.42 | 0.99 | 0.44 | 0.88 |
| 2211 | MRFFVPLFLVGLFPAILAKQF  | 22 | 0.22  | 0.62 | 0.62 | 1.66  | 0.34 | -1.02 | 0.36 | 2    | 11.01 | 2568.59 | 0.93 | 0.67 | 0.98 |
| 2212 | RFVPLFLVGLFPAILAKQFT   | 22 | 0.2   | 0.61 | 0.61 | 1.55  | 0.34 | -0.98 | 0.41 | 2    | 11.01 | 2538.5  | 0.98 | 0.63 | 0.89 |
| 2213 | FFVPLFLVGLFPAILAKQFTK  | 22 | 0.23  | 0.61 | 0.61 | 1.57  | 0.39 | -0.98 | 0.32 | 2    | 10.02 | 2510.49 | 0.80 | 0.63 | 0.99 |
| 2214 | FVPLFLVGLFPAILAKQFTKC  | 22 | 0.21  | 0.61 | 0.61 | 1.56  | 0.39 | -0.91 | 0.32 | 2    | 9.36  | 2466.45 | 0.94 | 0.60 | 0.98 |
| 2215 | VPLFLVGLFPAILAKQFTKCE  | 22 | 0.15  | 0.61 | 0.61 | 1.27  | 0.45 | -0.66 | 0.36 | 1    | 8.54  | 2448.39 | 0.93 | 0.57 | 0.88 |
| 2216 | PLFLVGLFPAILAKQFTKCEL  | 22 | 0.15  | 0.6  | 0.6  | 1.25  | 0.45 | -0.67 | 0.36 | 1    | 8.54  | 2462.42 | 0.93 | 0.52 | 0.82 |
| 2217 | LFLVGLFPAILAKQFTKCELS  | 22 | 0.14  | 0.61 | 0.61 | 1.29  | 0.45 | -0.66 | 0.41 | 1    | 8.54  | 2452.38 | 0.93 | 0.49 | 0.64 |
| 2218 | FLVGLFPAILAKQFTKCELSQ  | 22 | 0.09  | 0.61 | 0.61 | 0.96  | 0.51 | -0.57 | 0.5  | 1    | 8.54  | 2467.35 | 0.94 | 0.47 | 0.72 |
| 2219 | LVGLFPAILAKQFTKCELSQL  | 22 | 0.08  | 0.6  | 0.6  | 1     | 0.51 | -0.54 | 0.5  | 1    | 8.54  | 2433.34 | 0.93 | 0.44 | 0.21 |
| 2220 | VGILFPAILAKQFTKCELSQLL | 22 | 0.08  | 0.6  | 0.6  | 1     | 0.51 | -0.54 | 0.5  | 1    | 8.54  | 2433.34 | 0.93 | 0.47 | 0.80 |
| 2221 | GILFPAILAKQFTKCELSQLLK | 22 | 0.01  | 0.6  | 0.6  | 0.64  | 0.67 | -0.33 | 0.59 | 2    | 9.25  | 2462.38 | 0.83 | 0.47 | 0.94 |
| 2222 | ILFPAILAKQFTKCELSQLLKD | 22 | -0.03 | 0.61 | 0.61 | 0.5   | 0.67 | -0.2  | 0.64 | 1    | 8.51  | 2520.41 | 0.93 | 0.46 | 0.88 |
| 2223 | LFPAILAKQFTKCELSQLLKD  | 22 | -0.03 | 0.61 | 0.61 | 0.5   | 0.67 | -0.2  | 0.64 | 1    | 8.51  | 2520.41 | 0.93 | 0.43 | 0.57 |
| 2224 | FPAILAKQFTKCELSQLLKDID | 22 | -0.09 | 0.62 | 0.62 | 0.16  | 0.67 | 0.02  | 0.68 | 0    | 6.43  | 2522.33 | 0.94 | 0.43 | 0.60 |
| 2225 | PAILAKQFTKCELSQLLKDIDG | 22 | -0.11 | 0.62 | 0.62 | 0.02  | 0.67 | 0.14  | 0.68 | 0    | 6.43  | 2432.21 | 0.93 | 0.43 | 0.14 |
| 2226 | AILAKQFTKCELSQLLKDIDGY | 22 | -0.1  | 0.63 | 0.63 | 0.03  | 0.67 | 0.03  | 0.73 | 0    | 6.43  | 2498.27 | 0.80 | 0.35 | 0.06 |
| 2227 | ILAKQFTKCELSQLLKDIDYGG | 22 | -0.11 | 0.64 | 0.64 | -0.07 | 0.67 | 0.05  | 0.73 | 0    | 6.43  | 2484.25 | 0.99 | 0.37 | 0.04 |
| 2228 | _AKQFTKCELSQLLKDIDYGGC | 22 | -0.13 | 0.64 | 0.64 | -0.29 | 0.67 | 0.14  | 0.73 | 0    | 6.43  | 2428.14 | 0.98 | 0.35 | 0.28 |
| 2229 | AKQFTKCELSQLLKDIDYGGI  | 22 | -0.12 | 0.65 | 0.65 | -0.26 | 0.67 | 0.14  | 0.73 | 0    | 6.43  | 2428.14 | 0.61 | 0.32 | 0.04 |
| 2230 | KQFTKCELSQLLKDIDYGGIA  | 22 | -0.12 | 0.65 | 0.65 | -0.26 | 0.67 | 0.14  | 0.73 | 0    | 6.43  | 2428.14 | 0.99 | 0.32 | 0.09 |
| 2231 | QFTKCELSQLLKDIDYGGIAL  | 22 | -0.05 | 0.64 | 0.64 | 0.09  | 0.51 | -0.08 | 0.64 | -1   | 4.56  | 2413.13 | 0.94 | 0.32 | 0.03 |
| 2232 | FTKCELSQLLKDIDYGGIALP  | 22 | -0.02 | 0.63 | 0.63 | 0.18  | 0.45 | -0.09 | 0.55 | -1   | 4.56  | 2382.11 | 0.86 | 0.35 | 0.15 |
| 2233 | TKCELSQLLKDIDYGGIALPE  | 22 | -0.08 | 0.62 | 0.62 | -0.11 | 0.51 | 0.16  | 0.59 | -2   | 4.32  | 2364.05 | 0.99 | 0.37 | 0.06 |
| 2234 | KCELSQLLKDIDYGGIALPEL  | 22 | -0.05 | 0.62 | 0.62 | 0.1   | 0.51 | 0.1   | 0.55 | -2   | 4.32  | 2376.11 | 0.99 | 0.37 | 0.03 |
| 2235 | CELSQLLKDIDYGGIALPELI  | 22 | 0.04  | 0.63 | 0.63 | 0.48  | 0.34 | -0.12 | 0.45 | -3   | 3.92  | 2361.1  | 0.86 | 0.36 | 0.03 |
| 2236 | ELSQLLKDIDYGGIALPELIC  | 22 | 0.04  | 0.63 | 0.63 | 0.48  | 0.34 | -0.12 | 0.45 | -3   | 3.92  | 2361.1  | 0.61 | 0.37 | 0.03 |
| 2237 | LSQLLKDIDYGGIALPELICT  | 22 | 0.06  | 0.62 | 0.62 | 0.6   | 0.28 | -0.28 | 0.45 | -2   | 4.03  | 2333.09 | 0.99 | 0.36 | 0.04 |
| 2238 | SQLLKDIDYGGIALPELICTM  | 22 | 0.05  | 0.63 | 0.63 | 0.52  | 0.28 | -0.25 | 0.45 | -2   | 4.03  | 2351.12 | 0.99 | 0.37 | 0.12 |

|      |                        |    |       |      |      |       |      |       |      |      |       |         |      |      |      |
|------|------------------------|----|-------|------|------|-------|------|-------|------|------|-------|---------|------|------|------|
| 2239 | QLLKIDIDYGGIALPELICMF  | 22 | 0.09  | 0.64 | 0.64 | 0.68  | 0.28 | -0.38 | 0.41 | -2   | 4.03  | 2411.22 | 0.94 | 0.36 | 0.04 |
| 2240 | LLKIDIDYGGIALPELICMFH  | 22 | 0.1   | 0.61 | 0.61 | 0.7   | 0.29 | -0.41 | 0.36 | -1.5 | 4.54  | 2420.23 | 0.97 | 0.43 | 0.04 |
| 2241 | LKDIDYGGIALPELICMFHT   | 22 | 0.07  | 0.61 | 0.61 | 0.49  | 0.29 | -0.35 | 0.41 | -1.5 | 4.54  | 2408.17 | 0.97 | 0.46 | 0.03 |
| 2242 | KDIDYGGIALPELICMFHTS   | 22 | 0.03  | 0.61 | 0.61 | 0.28  | 0.29 | -0.25 | 0.45 | -1.5 | 4.54  | 2382.08 | 0.97 | 0.38 | 0.03 |
| 2243 | DIDYGGIALPELICMFHTSG   | 22 | 0.09  | 0.61 | 0.61 | 0.44  | 0.12 | -0.39 | 0.36 | -2.5 | 4.03  | 2310.96 | 0.94 | 0.34 | 0.06 |
| 2244 | IDYGGIALPELICMFHTSGY   | 22 | 0.12  | 0.6  | 0.6  | 0.54  | 0.12 | -0.63 | 0.36 | -1.5 | 4.36  | 2359.05 | 0.97 | 0.34 | 0.07 |
| 2245 | DYGGIALPELICMFHTSGYC   | 22 | 0.05  | 0.61 | 0.61 | 0.18  | 0.12 | -0.41 | 0.41 | -2.5 | 4.03  | 2360.97 | 0.94 | 0.33 | 0.09 |
| 2246 | YGGIALPELICMFHTSGYDT   | 22 | 0.08  | 0.6  | 0.6  | 0.3   | 0.12 | -0.57 | 0.41 | -1.5 | 4.36  | 2346.99 | 0.83 | 0.29 | 0.11 |
| 2247 | YGGIALPELICMFHTSGYDTQ  | 22 | 0.6   | 0.6  | 0.6  | 0.16  | 0.18 | -0.56 | 0.5  | -1.5 | 4.36  | 2418.07 | 0.93 | 0.29 | 0.07 |
| 2248 | GGIALPELICMFHTSGYDTQA  | 22 | 0.05  | 0.59 | 0.59 | 0.3   | 0.18 | -0.48 | 0.45 | -1.5 | 4.36  | 2325.97 | 0.83 | 0.28 | 0.22 |
| 2249 | GIALPELICMFHTSGYDTQAI  | 22 | 0.08  | 0.59 | 0.59 | 0.53  | 0.18 | -0.56 | 0.45 | -1.5 | 4.36  | 2382.08 | 0.95 | 0.27 | 0.06 |
| 2250 | IALPELICMFHTSGYDTQAI   | 22 | 0.09  | 0.59 | 0.59 | 0.74  | 0.18 | -0.63 | 0.45 | -1.5 | 4.36  | 2424.16 | 0.93 | 0.27 | 0.03 |
| 2251 | ALPELICMFHTSGYDTQAI    | 22 | 0.03  | 0.59 | 0.59 | 0.37  | 0.24 | -0.41 | 0.5  | -2.5 | 4.14  | 2440.11 | 0.80 | 0.31 | 0.03 |
| 2252 | LPELICMFHTSGYDTQAI     | 22 | -0.01 | 0.6  | 0.6  | 0.13  | 0.24 | -0.38 | 0.59 | -2.5 | 4.14  | 2483.14 | 0.93 | 0.34 | 0.04 |
| 2253 | PELICMFHTSGYDTQAI      | 22 | -0.06 | 0.61 | 0.61 | -0.2  | 0.24 | -0.29 | 0.68 | -2.5 | 4.14  | 2484.08 | 0.63 | 0.30 | 0.04 |
| 2254 | ELICTMFHTSGYDTQAI      | 22 | -0.09 | 0.62 | 0.62 | -0.29 | 0.3  | -0.15 | 0.73 | -3.5 | 4     | 2516.08 | 0.94 | 0.30 | 0.03 |
| 2255 | LICTMFHTSGYDTQAI       | 22 | -0.07 | 0.62 | 0.62 | -0.16 | 0.24 | -0.27 | 0.73 | -2.5 | 4.14  | 2474.04 | 0.93 | 0.32 | 0.03 |
| 2256 | ICTMFHTSGYDTQAI        | 22 | -0.1  | 0.62 | 0.62 | -0.37 | 0.24 | -0.21 | 0.77 | -2.5 | 4.14  | 2461.98 | 0.93 | 0.33 | 0.11 |
| 2257 | CTMFHTSGYDTQAI         | 22 | -0.16 | 0.62 | 0.62 | -0.73 | 0.3  | 0.01  | 0.82 | -3.5 | 4     | 2477.93 | 0.94 | 0.32 | 0.04 |
| 2258 | FMFHTSGYDTQAI          | 22 | -0.16 | 0.62 | 0.62 | -0.9  | 0.3  | -0.05 | 0.86 | -3.5 | 4     | 2537.97 | 0.93 | 0.34 | 0.04 |
| 2259 | MFHTSGYDTQAI           | 22 | -0.15 | 0.63 | 0.63 | -0.89 | 0.3  | -0.03 | 0.82 | -3.5 | 4     | 2493.92 | 0.98 | 0.35 | 0.04 |
| 2260 | FHTSGYDTQAI            | 22 | -0.14 | 0.62 | 0.62 | -0.8  | 0.3  | -0.05 | 0.82 | -3.5 | 4     | 2475.89 | 0.94 | 0.34 | 0.03 |
| 2261 | HTSGYDTQAI             | 22 | -0.14 | 0.62 | 0.62 | -0.8  | 0.3  | -0.05 | 0.82 | -3.5 | 4     | 2475.89 | 0.93 | 0.31 | 0.04 |
| 2262 | FSGYDTQAI              | 22 | -0.15 | 0.65 | 0.65 | -0.82 | 0.29 | -0.02 | 0.86 | -4   | 3.51  | 2466.88 | 0.93 | 0.27 | 0.03 |
| 2263 | SGYDTQAI               | 22 | -0.11 | 0.65 | 0.65 | -0.58 | 0.29 | -0.09 | 0.82 | -4   | 3.51  | 2478.94 | 0.93 | 0.33 | 0.05 |
| 2264 | GYDTQAI                | 22 | -0.11 | 0.65 | 0.65 | -0.58 | 0.29 | -0.09 | 0.82 | -4   | 3.51  | 2478.94 | 0.83 | 0.39 | 0.09 |
| 2265 | YDTQAI                 | 22 | -0.14 | 0.66 | 0.66 | -0.72 | 0.29 | -0.08 | 0.91 | -4   | 3.51  | 2535.99 | 0.98 | 0.38 | 0.04 |
| 2266 | DTQAI                  | 22 | -0.2  | 0.66 | 0.66 | -0.84 | 0.45 | 0.16  | 0.95 | -3   | 4.01  | 2500.99 | 0.94 | 0.36 | 0.04 |
| 2267 | TQAI                   | 22 | -0.14 | 0.65 | 0.65 | -0.51 | 0.45 | -0.05 | 0.91 | -2   | 4.26  | 2499.07 | 0.98 | 0.39 | 0.11 |
| 2268 | QAI                    | 22 | -0.11 | 0.65 | 0.65 | -0.52 | 0.45 | -0.19 | 0.91 | -2   | 4.26  | 2584.18 | 0.98 | 0.38 | 0.06 |
| 2269 | AIVENNESTEYGLFQISNKLWC | 22 | -0.08 | 0.64 | 0.64 | -0.25 | 0.4  | -0.25 | 0.82 | -2   | 4.26  | 2559.18 | 0.80 | 0.43 | 0.06 |
| 2270 | IVENNESTEYGLFQISNKLWCK | 22 | -0.14 | 0.65 | 0.65 | -0.5  | 0.56 | -0.09 | 0.91 | -1   | 4.79  | 2616.28 | 0.87 | 0.41 | 0.12 |
| 2271 | VENNESTEYGLFQISNKLWCK  | 22 | -0.19 | 0.64 | 0.64 | -0.75 | 0.56 | 0.01  | 0.95 | -1   | 4.79  | 2590.19 | 0.98 | 0.40 | 0.04 |
| 2272 | ENNESTEYGLFQISNKLWCK   | 22 | -0.22 | 0.63 | 0.63 | -0.97 | 0.56 | 0.09  | 1    | -1   | 4.79  | 2578.13 | 0.61 | 0.42 | 0.05 |
| 2273 | VNESTEYGLFQISNKLWCKSSC | 22 | -0.23 | 0.63 | 0.63 | -0.97 | 0.56 | -0.04 | 1.05 | 0    | 6.45  | 2577.15 | 0.87 | 0.42 | 0.03 |
| 2274 | NESTEYGLFQISNKLWCKSSQ  | 22 | -0.17 | 0.63 | 0.63 | -0.62 | 0.56 | -0.11 | 0.95 | 0    | 6.45  | 2562.18 | 0.99 | 0.44 | 0.04 |
| 2275 | ESTEYGLFQISNKLWCKSSQVF | 22 | -0.15 | 0.61 | 0.61 | -0.54 | 0.56 | -0.12 | 0.86 | 0    | 6.45  | 2545.19 | 0.61 | 0.48 | 0.04 |
| 2276 | TEYGLFQISNKLWCKSSQVPC  | 22 | -0.15 | 0.61 | 0.61 | -0.54 | 0.56 | -0.25 | 0.91 | 1    | 8.51  | 2544.21 | 0.97 | 0.47 | 0.04 |
| 2277 | EYGLFQISNKLWCKSSQVPS   | 22 | -0.15 | 0.61 | 0.61 | -0.54 | 0.56 | -0.25 | 0.91 | 1    | 8.51  | 2544.21 | 0.99 | 0.47 | 0.03 |
| 2278 | YGLFQISNKLWCKSSQVPSF   | 22 | -0.22 | 0.62 | 0.62 | -0.71 | 0.67 | -0.1  | 1.05 | 2    | 9.25  | 2599.29 | 0.61 | 0.46 | 0.10 |
| 2279 | GLFQISNKLWCKSSQVPSRF   | 22 | -0.22 | 0.62 | 0.62 | -0.71 | 0.62 | -0.22 | 1.09 | 3    | 9.8   | 2584.28 | 0.99 | 0.45 | 0.07 |
| 2280 | LQISNKLWCKSSQVPSRN     | 22 | -0.19 | 0.62 | 0.62 | -0.45 | 0.62 | -0.2  | 1.05 | 3    | 10.07 | 2534.27 | 0.93 | 0.40 | 0.55 |
| 2281 | LFQISNKLWCKSSQVPSRNIC  | 22 | -0.2  | 0.62 | 0.62 | -0.31 | 0.62 | -0.25 | 1.05 | 3    | 9.53  | 2580.35 | 0.94 | 0.41 | 0.58 |
| 2282 | FQISNKLWCKSSQVPSRNICI  | 22 | -0.25 | 0.63 | 0.63 | -0.65 | 0.62 | -0.03 | 1.09 | 2    | 8.98  | 2582.27 | 0.61 | 0.45 | 0.13 |
| 2283 | QISNKLWCKSSQVPSRNICDI  | 22 | -0.25 | 0.63 | 0.63 | -0.57 | 0.62 | 0     | 1.09 | 2    | 8.98  | 2548.26 | 0.99 | 0.47 | 0.10 |
| 2284 | ISNKLWCKSSQVPSRNICDIS  | 22 | -0.23 | 0.63 | 0.63 | -0.45 | 0.56 | 0.01  | 1.05 | 2    | 8.98  | 2507.2  | 0.99 | 0.49 | 0.10 |
| 2285 | SNKLWCKSSQVPSRNICDISC  | 22 | -0.26 | 0.62 | 0.62 | -0.54 | 0.56 | 0.05  | 1.05 | 2    | 8.77  | 2497.17 | 0.99 | 0.44 | 0.69 |
| 2286 | NKLWCKSSQVPSRNICDISCI  | 22 | -0.28 | 0.63 | 0.63 | -0.66 | 0.56 | 0.17  | 1.05 | 1    | 8.24  | 2525.18 | 0.99 | 0.44 | 0.34 |
| 2287 | KLWCKSSQVPSRNICDISCD   | 22 | -0.3  | 0.63 | 0.63 | -0.68 | 0.73 | 0.3   | 1.05 | 2    | 8.75  | 2539.25 | 0.99 | 0.40 | 0.88 |
| 2288 | _WCKSSQVPSRNICDISDKF   | 22 | -0.22 | 0.63 | 0.63 | -0.37 | 0.56 | 0.05  | 0.95 | 1    | 8.24  | 2558.25 | 0.97 | 0.40 | 0.69 |
| 2289 | MCKSSQVPSRNICDISDKFL   | 22 | -0.22 | 0.63 | 0.63 | -0.37 | 0.56 | 0.05  | 0.95 | 1    | 8.24  | 2558.25 | 0.97 | 0.43 | 0.81 |
| 2290 | CKSSQVPSRNICDISDKFLD   | 22 | -0.27 | 0.64 | 0.64 | -0.49 | 0.56 | 0.34  | 0.95 | 0    | 6.3   | 2487.12 | 0.86 | 0.32 | 0.17 |
| 2291 | KSSQVPSRNICDISDKFLDD   | 22 | -0.31 | 0.65 | 0.65 | -0.76 | 0.56 | 0.52  | 1    | -1   | 4.58  | 2499.07 | 0.99 | 0.30 | 0.12 |
| 2292 | SSQVPSRNICDISDKFLDDC   | 22 | -0.29 | 0.65 | 0.65 | -0.75 | 0.39 | 0.52  | 0.95 | -3   | 3.98  | 2485.98 | 0.99 | 0.30 | 0.06 |
| 2293 | SQVPSRNICDISDKFLDDDI   | 22 | -0.24 | 0.66 | 0.66 | -0.5  | 0.39 | 0.42  | 0.91 | -3   | 3.98  | 2512.07 | 0.99 | 0.32 | 0.08 |
| 2294 | QVPSRNICDISDKFLDDDDIT  | 22 | -0.24 | 0.66 | 0.66 | -0.5  | 0.39 | 0.39  | 0.91 | -3   | 3.98  | 2526.1  | 0.98 | 0.32 | 0.06 |
| 2295 | VPQSRNICDISDKFLDDDDITD | 22 | -0.24 | 0.66 | 0.66 | -0.5  | 0.34 | 0.52  | 0.86 | -4   | 3.86  | 2513.05 | 0.98 | 0.28 | 0.06 |
| 2296 | PQSRNICDISDKFLDDDDITDD | 22 | -0.3  | 0.67 | 0.67 | -0.85 | 0.34 | 0.72  | 0.91 | -5   | 3.77  | 2529    | 0.87 | 0.28 | 0.10 |
| 2297 | QSRNICDISDKFLDDDDITDDI | 22 | -0.26 | 0.68 | 0.68 | -0.57 | 0.34 | 0.64  | 0.91 | -5   | 3.77  | 2545.05 | 0.99 | 0.33 | 0.12 |
| 2298 | SRNICDISDKFLDDDDITDDIM | 22 | -0.22 | 0.69 | 0.69 | -0.33 | 0.28 | 0.57  | 0.82 | -5   | 3.77  | 2548.11 | 0.99 | 0.30 | 0.09 |
| 2299 | RNICDISDKFLDDDDITDDIMC | 22 | -0.21 | 0.69 | 0.69 | -0.18 | 0.28 | 0.51  | 0.77 | -5   | 3.77  | 2564.17 | 0.99 | 0.31 | 0.22 |
| 2300 | NICDISDKFLDDDDITDDIMCA | 22 | -0.11 | 0.68 | 0.68 | 0.11  | 0.17 | 0.35  | 0.59 | -6   | 3.5   | 2479.06 | 0.98 | 0.31 | 0.06 |
| 2301 | ICDISDKFLDDDDITDDIMCAK | 22 | -0.14 | 0.68 | 0.68 | 0.09  | 0.33 | 0.48  | 0.59 | -5   | 3.77  | 2493.13 | 0.99 | 0.30 | 0.14 |
| 2302 | CDISDKFLDDDDITDDIMCAKK | 22 | -0.22 | 0.68 | 0.68 | -0.29 | 0.5  | 0.7   | 0.68 | -4   | 4     | 2508.14 | 0.61 | 0.33 | 0.23 |

|      |                          |    |       |      |      |       |      |       |      |      |       |         |      |      |      |
|------|--------------------------|----|-------|------|------|-------|------|-------|------|------|-------|---------|------|------|------|
| 2303 | DISCDKFLDDDDITDDIMCAKKI  | 22 | -0.19 | 0.68 | 0.68 | -0.2  | 0.5  | 0.66  | 0.68 | -4   | 4     | 2518.17 | 0.61 | 0.34 | 0.07 |
| 2304 | ISCDKFLDDDDITDDIMCAKKIL  | 22 | -0.13 | 0.67 | 0.67 | 0.13  | 0.5  | 0.45  | 0.64 | -3   | 4.12  | 2516.25 | 0.98 | 0.38 | 0.40 |
| 2305 | SCDKFLDDDDITDDIMCAKKILD  | 22 | -0.2  | 0.67 | 0.67 | -0.23 | 0.5  | 0.66  | 0.68 | -4   | 4     | 2518.17 | 0.98 | 0.38 | 0.18 |
| 2306 | CDKFLDDDDITDDIMCAKKILDI  | 22 | -0.15 | 0.68 | 0.68 | 0.01  | 0.5  | 0.57  | 0.64 | -4   | 4     | 2544.26 | 0.94 | 0.38 | 0.04 |
| 2307 | DKFLDDDDITDDIMCAKKILDIK  | 22 | -0.2  | 0.68 | 0.68 | -0.28 | 0.67 | 0.75  | 0.73 | -3   | 4.22  | 2569.3  | 0.61 | 0.35 | 0.05 |
| 2308 | KFLDDDDITDDIMCAKKILDIKG  | 22 | -0.16 | 0.68 | 0.68 | -0.14 | 0.67 | 0.61  | 0.68 | -2   | 4.4   | 2511.27 | 0.98 | 0.40 | 0.10 |
| 2309 | FLDDDDITDDIMCAKKILDIKGI  | 22 | -0.08 | 0.68 | 0.68 | 0.24  | 0.5  | 0.4   | 0.59 | -3   | 4.12  | 2496.26 | 0.61 | 0.39 | 0.04 |
| 2310 | LDDDDITDDIMCAKKILDKIGID  | 22 | -0.14 | 0.68 | 0.68 | -0.05 | 0.5  | 0.65  | 0.64 | -4   | 4     | 2464.17 | 0.99 | 0.33 | 0.04 |
| 2311 | DDDDITDDIMCAKKILDKIGIDY  | 22 | -0.16 | 0.69 | 0.69 | -0.28 | 0.5  | 0.62  | 0.68 | -4   | 4     | 2514.18 | 0.80 | 0.34 | 0.04 |
| 2312 | DDITDDIMCAKKILDKIGIDYWW  | 22 | -0.11 | 0.68 | 0.68 | -0.16 | 0.5  | 0.33  | 0.68 | -3   | 4.12  | 2585.31 | 0.80 | 0.44 | 0.04 |
| 2313 | DITDDIMCAKKILDKIGIDYWL   | 22 | -0.06 | 0.67 | 0.67 | 0.17  | 0.5  | 0.11  | 0.64 | -2   | 4.29  | 2583.39 | 0.94 | 0.46 | 0.04 |
| 2314 | ITDDIMCAKKILDKIGIDYWLA   | 22 | -0.01 | 0.66 | 0.66 | 0.41  | 0.5  | -0.05 | 0.59 | -1   | 4.58  | 2539.38 | 0.93 | 0.51 | 0.11 |
| 2315 | TDDIMCAKKILDKIGIDYWLAH   | 22 | -0.07 | 0.63 | 0.63 | 0.06  | 0.57 | 0.01  | 0.64 | -0.5 | 5.37  | 2563.36 | 0.93 | 0.50 | 0.04 |
| 2316 | DDIMCAKKILDKIGIDYWLAKH   | 22 | -0.11 | 0.63 | 0.63 | -0.08 | 0.73 | 0.17  | 0.68 | 0.5  | 7.05  | 2590.43 | 0.94 | 0.52 | 0.31 |
| 2317 | DIMCAKKILDKIGIDYWLAKHA   | 22 | -0.06 | 0.62 | 0.62 | 0.16  | 0.73 | 0.01  | 0.64 | 1.5  | 8.46  | 2546.42 | 0.94 | 0.56 | 0.96 |
| 2318 | IMCAKKILDKIGIDYWLAKHAL   | 22 | -0.01 | 0.61 | 0.61 | 0.49  | 0.73 | -0.21 | 0.59 | 2.5  | 9.1   | 2544.5  | 0.97 | 0.57 | 0.98 |
| 2319 | MCAKKILDKIGIDYWLAKHALC   | 22 | -0.04 | 0.61 | 0.61 | 0.4   | 0.73 | -0.17 | 0.59 | 2.5  | 8.87  | 2534.47 | 0.93 | 0.51 | 0.98 |
| 2320 | CAKKILDKIGIDYWLAKHALCT   | 22 | -0.06 | 0.6  | 0.6  | 0.28  | 0.73 | -0.13 | 0.64 | 2.5  | 8.87  | 2504.38 | 0.69 | 0.53 | 0.97 |
| 2321 | AKKILDKIGIDYWLAKHALCTE   | 22 | -0.09 | 0.6  | 0.6  | 0.01  | 0.79 | 0.05  | 0.68 | 1.5  | 8.46  | 2530.36 | 0.94 | 0.55 | 0.86 |
| 2322 | KKILDKIGIDYWLAKHALCTEK   | 22 | -0.15 | 0.61 | 0.61 | -0.25 | 0.96 | 0.21  | 0.77 | 2.5  | 9.05  | 2587.46 | 0.98 | 0.50 | 0.72 |
| 2323 | KILDKIGIDYWLAKHALCTEKL   | 22 | -0.07 | 0.6  | 0.6  | 0.1   | 0.79 | -0.01 | 0.68 | 1.5  | 8.46  | 2572.45 | 0.98 | 0.48 | 0.46 |
| 2324 | ILDKIGIDYWLAKHALCTEKLE   | 22 | -0.05 | 0.6  | 0.6  | 0.12  | 0.68 | -0.01 | 0.64 | -0.5 | 5.5   | 2573.39 | 0.98 | 0.51 | 0.03 |
| 2325 | LDIKIGIDYWLAKHALCTEQLQ   | 22 | -0.12 | 0.6  | 0.6  | -0.25 | 0.74 | 0.08  | 0.73 | -0.5 | 5.5   | 2588.36 | 0.93 | 0.42 | 0.03 |
| 2326 | DIKIGIDYWLAKHALCTEQLQW   | 22 | -0.12 | 0.6  | 0.6  | -0.46 | 0.74 | 0.01  | 0.77 | -0.5 | 5.5   | 2661.41 | 0.94 | 0.45 | 0.04 |
| 2327 | IKGIDYWLAKHALCTEQLQWL    | 22 | -0.07 | 0.59 | 0.59 | -0.13 | 0.74 | -0.21 | 0.73 | 0.5  | 7.06  | 2659.49 | 0.93 | 0.44 | 0.31 |
| 2328 | GIDYWLAKHALCTEQLQWLCE    | 22 | -0.1  | 0.58 | 0.58 | -0.22 | 0.74 | -0.17 | 0.73 | 0.5  | 7.03  | 2649.46 | 0.93 | 0.46 | 0.57 |
| 2329 | IIDYWLAKHALCTEQLQWLCE    | 22 | -0.08 | 0.58 | 0.58 | -0.2  | 0.63 | -0.17 | 0.68 | -1.5 | 4.84  | 2650.4  | 0.83 | 0.40 | 0.10 |
| 2330 | IDYWLAKHALCTEQLQWLCE     | 22 | -0.13 | 0.58 | 0.58 | -0.36 | 0.8  | -0.04 | 0.77 | -0.5 | 5.54  | 2721.52 | 0.93 | 0.40 | 0.13 |
| 2331 | IYWLAKHALCTEQLQWLCEKI    | 22 | -0.14 | 0.58 | 0.58 | -0.39 | 0.8  | -0.04 | 0.77 | -0.5 | 5.54  | 2721.52 | 0.86 | 0.44 | 0.57 |
| 2332 | MRFFVPLFLVGIILFPAILAKQFT | 23 | 0.21  | 0.62 | 0.62 | 1.56  | 0.32 | -0.99 | 0.39 | 2    | 11.01 | 2669.71 | 0.93 | 0.60 | 0.77 |
| 2333 | RFFVPLFLVGIILFPAILAKQFTK | 23 | 0.15  | 0.61 | 0.61 | 1.31  | 0.48 | -0.8  | 0.48 | 3    | 11.17 | 2666.69 | 0.98 | 0.62 | 0.96 |
| 2334 | FFVPLFLVGIILFPAILAKQFTKC | 23 | 0.23  | 0.61 | 0.61 | 1.61  | 0.37 | -0.98 | 0.3  | 2    | 9.36  | 2613.64 | 0.94 | 0.59 | 0.98 |
| 2335 | FVPLFLVGIILFPAILAKQFTKCE | 23 | 0.17  | 0.61 | 0.61 | 1.34  | 0.43 | -0.74 | 0.35 | 1    | 8.54  | 2595.58 | 0.94 | 0.57 | 0.98 |
| 2336 | VPLFLVGIILFPAILAKQFTKCEL | 23 | 0.17  | 0.6  | 0.6  | 1.38  | 0.43 | -0.71 | 0.35 | 1    | 8.54  | 2561.57 | 0.93 | 0.49 | 0.65 |
| 2337 | PLFLVGIILFPAILAKQFTKCELS | 23 | 0.13  | 0.6  | 0.6  | 1.17  | 0.43 | -0.63 | 0.39 | 1    | 8.54  | 2549.51 | 0.98 | 0.47 | 0.88 |
| 2338 | LFLVGIILFPAILAKQFTKCELSQ | 23 | 0.11  | 0.61 | 0.61 | 1.08  | 0.48 | -0.62 | 0.48 | 1    | 8.54  | 2580.53 | 0.93 | 0.47 | 0.44 |
| 2339 | FLVGIILFPAILAKQFTKCELSQL | 23 | 0.11  | 0.61 | 0.61 | 1.08  | 0.48 | -0.62 | 0.48 | 1    | 8.54  | 2580.53 | 0.94 | 0.45 | 0.48 |
| 2340 | LVGIILFPAILAKQFTKCELSQLL | 23 | 0.1   | 0.6  | 0.6  | 1.13  | 0.48 | -0.59 | 0.48 | 1    | 8.54  | 2546.52 | 0.93 | 0.43 | 0.67 |
| 2341 | VGILFPAILAKQFTKCELSQLLK  | 23 | 0.03  | 0.61 | 0.61 | 0.79  | 0.64 | -0.38 | 0.57 | 2    | 9.25  | 2561.53 | 0.93 | 0.47 | 0.92 |
| 2342 | GILFPAILAKQFTKCELSQLLKD  | 23 | -0.02 | 0.61 | 0.61 | 0.46  | 0.64 | -0.19 | 0.61 | 1    | 8.51  | 2577.48 | 0.83 | 0.50 | 0.97 |
| 2343 | ILFPAILAKQFTKCELSQLLKDI  | 23 | 0     | 0.61 | 0.61 | 0.67  | 0.64 | -0.27 | 0.61 | 1    | 8.51  | 2633.59 | 0.93 | 0.49 | 0.73 |
| 2344 | LFPAILAKQFTKCELSQLLKDID  | 23 | -0.06 | 0.61 | 0.61 | 0.32  | 0.64 | -0.06 | 0.65 | 0    | 6.43  | 2635.51 | 0.93 | 0.45 | 0.57 |
| 2345 | FPAILAKQFTKCELSQLLKIDIG  | 23 | -0.08 | 0.62 | 0.62 | 0.14  | 0.64 | 0.02  | 0.65 | 0    | 6.43  | 2579.4  | 0.94 | 0.44 | 0.19 |
| 2346 | PAILAKQFTKCELSQLLKIDIGY  | 23 | -0.1  | 0.62 | 0.62 | -0.04 | 0.64 | 0.03  | 0.7  | 0    | 6.43  | 2595.4  | 0.93 | 0.39 | 0.07 |
| 2347 | AILAKQFTKCELSQLLKIDIGYC  | 23 | -0.09 | 0.63 | 0.63 | 0.01  | 0.64 | 0.03  | 0.7  | 0    | 6.43  | 2555.34 | 0.80 | 0.38 | 0.09 |
| 2348 | LAKQFTKCELSQLLKIDIGYGC   | 23 | -0.1  | 0.64 | 0.64 | -0.08 | 0.64 | 0.05  | 0.7  | 0    | 6.43  | 2541.32 | 0.98 | 0.36 | 0.04 |
| 2349 | AKQFTKCELSQLLKIDIGYGG    | 23 | -0.1  | 0.64 | 0.64 | -0.08 | 0.64 | 0.05  | 0.7  | 0    | 6.43  | 2541.32 | 0.98 | 0.35 | 0.13 |
| 2350 | KQFTKCELSQLLKIDIGYGGII   | 23 | -0.11 | 0.64 | 0.64 | -0.17 | 0.64 | 0.11  | 0.7  | 0    | 6.43  | 2499.23 | 0.61 | 0.33 | 0.03 |
| 2351 | QFTKCELSQLLKIDIGYGGIAI   | 23 | -0.1  | 0.64 | 0.64 | -0.08 | 0.64 | 0.05  | 0.7  | 0    | 6.43  | 2541.32 | 0.99 | 0.35 | 0.08 |
| 2352 | JFTKCELSQLLKIDIGYGGIALI  | 23 | -0.05 | 0.63 | 0.63 | 0.02  | 0.48 | -0.08 | 0.61 | -1   | 4.56  | 2510.26 | 0.87 | 0.34 | 0.03 |
| 2353 | TKCELSQLLKIDIGYGGIALPE   | 23 | -0.05 | 0.63 | 0.63 | 0.02  | 0.48 | 0.04  | 0.57 | -2   | 4.32  | 2511.24 | 0.86 | 0.33 | 0.13 |
| 2354 | FKCELSQLLKIDIGYGGIALPEL  | 23 | -0.05 | 0.62 | 0.62 | 0.06  | 0.48 | 0.07  | 0.57 | -2   | 4.32  | 2477.23 | 0.99 | 0.36 | 0.03 |
| 2355 | KCELSQLLKIDIGYGGIALPELI  | 23 | -0.01 | 0.63 | 0.63 | 0.29  | 0.48 | 0.01  | 0.52 | -2   | 4.32  | 2489.29 | 0.99 | 0.35 | 0.05 |
| 2356 | CELSQLLKIDIGYGGIALPELIC  | 23 | 0.04  | 0.63 | 0.63 | 0.57  | 0.32 | -0.16 | 0.43 | -3   | 3.92  | 2464.25 | 0.86 | 0.35 | 0.03 |
| 2357 | ELSQLLKIDIGYGGIALPELIC   | 23 | 0.03  | 0.62 | 0.62 | 0.43  | 0.32 | -0.13 | 0.48 | -3   | 3.92  | 2462.22 | 0.61 | 0.35 | 0.04 |
| 2358 | LSQLLKIDIGYGGIALPELIC    | 23 | 0.07  | 0.63 | 0.63 | 0.66  | 0.27 | -0.32 | 0.43 | -2   | 4.03  | 2464.3  | 0.97 | 0.35 | 0.07 |
| 2359 | SQLLKIDIGYGGIALPELIC     | 23 | 0.07  | 0.63 | 0.63 | 0.62  | 0.27 | -0.35 | 0.43 | -2   | 4.03  | 2498.31 | 0.99 | 0.34 | 0.04 |
| 2360 | QLLKIDIGYGGIALPELIC      | 23 | 0.06  | 0.61 | 0.61 | 0.51  | 0.33 | -0.39 | 0.43 | -1.5 | 4.54  | 2548.38 | 0.94 | 0.39 | 0.04 |
| 2361 | LLKIDIGYGGIALPELIC       | 23 | 0.09  | 0.6  | 0.6  | 0.63  | 0.28 | -0.41 | 0.39 | -1.5 | 4.54  | 2521.35 | 0.99 | 0.42 | 0.03 |
| 2362 | LKIDIGYGGIALPELIC        | 23 | 0.05  | 0.6  | 0.6  | 0.43  | 0.28 | -0.32 | 0.43 | -1.5 | 4.54  | 2495.26 | 0.97 | 0.37 | 0.03 |
| 2363 | KIDIGYGGIALPELIC         | 23 | 0.04  | 0.61 | 0.61 | 0.25  | 0.28 | -0.24 | 0.43 | -1.5 | 4.54  | 2439.15 | 0.98 | 0.32 | 0.03 |
| 2364 | IDYGGIALPELIC            | 23 | 0.08  | 0.61 | 0.61 | 0.37  | 0.12 | -0.47 | 0.39 | -2.5 | 4.03  | 2474.15 | 0.94 | 0.33 | 0.07 |
| 2365 | DYGGIALPELIC             | 23 | 0.08  | 0.61 | 0.61 | 0.37  | 0.12 | -0.47 | 0.39 | -2.5 | 4.03  | 2474.15 | 0.93 | 0.32 | 0.08 |
| 2366 | YGGIALPELIC              | 23 | 0.04  | 0.6  | 0.6  | 0.14  | 0.12 | -0.41 | 0.43 | -2.5 | 4.03  | 2462.09 | 0.94 | 0.29 | 0.10 |

|      |                        |    |       |      |      |       |      |       |      |      |      |         |      |      |      |
|------|------------------------|----|-------|------|------|-------|------|-------|------|------|------|---------|------|------|------|
| 2367 | YGGIALPELICTFMHTSGYDTQ | 23 | 0.05  | 0.6  | 0.6  | 0.14  | 0.17 | -0.53 | 0.48 | -1.5 | 4.36 | 2475.14 | 0.83 | 0.29 | 0.18 |
| 2368 | 'GGIALPELICTFMHTSGYDTQ | 23 | 0.05  | 0.59 | 0.59 | 0.23  | 0.17 | -0.56 | 0.48 | -1.5 | 4.36 | 2489.16 | 0.93 | 0.28 | 0.05 |
| 2369 | GGIALPELICTFMHTSGYDTQA | 23 | 0.08  | 0.59 | 0.59 | 0.49  | 0.17 | -0.53 | 0.43 | -1.5 | 4.36 | 2439.15 | 0.83 | 0.28 | 0.07 |
| 2370 | GIALPELICTFMHTSGYDTQAI | 23 | 0.1   | 0.59 | 0.59 | 0.69  | 0.17 | -0.6  | 0.43 | -1.5 | 4.36 | 2481.23 | 0.95 | 0.30 | 0.09 |
| 2371 | IALPELICTFMHTSGYDTQAI  | 23 | 0.06  | 0.59 | 0.59 | 0.55  | 0.23 | -0.47 | 0.48 | -2.5 | 4.14 | 2553.29 | 0.93 | 0.31 | 0.04 |
| 2372 | ALPELICTFMHTSGYDTQAI   | 23 | 0     | 0.6  | 0.6  | 0.2   | 0.23 | -0.38 | 0.57 | -2.5 | 4.14 | 2554.23 | 0.80 | 0.34 | 0.04 |
| 2373 | .PELICTFMHTSGYDTQAI    | 23 | -0.03 | 0.61 | 0.61 | -0.03 | 0.23 | -0.35 | 0.65 | -2.5 | 4.14 | 2597.26 | 0.93 | 0.34 | 0.03 |
| 2374 | ELICTFMHTSGYDTQAI      | 23 | -0.08 | 0.61 | 0.61 | -0.34 | 0.28 | -0.14 | 0.7  | -3.5 | 4    | 2613.21 | 0.63 | 0.28 | 0.04 |
| 2375 | LICTMHTSGYDTQAI        | 23 | -0.09 | 0.62 | 0.62 | -0.31 | 0.28 | -0.13 | 0.74 | -3.5 | 4    | 2603.17 | 0.80 | 0.29 | 0.04 |
| 2376 | .ICTMHTSGYDTQAI        | 23 | -0.07 | 0.61 | 0.61 | -0.19 | 0.23 | -0.28 | 0.74 | -2.5 | 4.14 | 2575.16 | 0.98 | 0.34 | 0.03 |
| 2377 | CTMHTSGYDTQAI          | 23 | -0.12 | 0.62 | 0.62 | -0.5  | 0.28 | -0.07 | 0.78 | -3.5 | 4    | 2591.11 | 0.93 | 0.34 | 0.10 |
| 2378 | :TMHTSGYDTQAI          | 23 | -0.15 | 0.62 | 0.62 | -0.76 | 0.28 | -0.09 | 0.83 | -3.5 | 4    | 2641.12 | 0.94 | 0.33 | 0.05 |
| 2379 | MFHTSGYDTQAI           | 23 | -0.15 | 0.62 | 0.62 | -0.88 | 0.28 | -0.05 | 0.83 | -3.5 | 4    | 2595.04 | 0.98 | 0.37 | 0.04 |
| 2380 | IFHTSGYDTQAI           | 23 | -0.12 | 0.62 | 0.62 | -0.69 | 0.28 | -0.11 | 0.78 | -3.5 | 4    | 2607.1  | 0.93 | 0.34 | 0.03 |
| 2381 | HTSGYDTQAI             | 23 | -0.1  | 0.62 | 0.62 | -0.65 | 0.28 | -0.16 | 0.78 | -3.5 | 4    | 2623.08 | 0.94 | 0.35 | 0.03 |
| 2382 | ITSGYDTQAI             | 23 | -0.16 | 0.62 | 0.62 | -0.92 | 0.34 | -0.04 | 0.87 | -3.5 | 4    | 2604.04 | 0.93 | 0.29 | 0.03 |
| 2383 | 'SGYDTQAI              | 23 | -0.11 | 0.65 | 0.65 | -0.59 | 0.27 | -0.1  | 0.83 | -4   | 3.51 | 2580.06 | 0.93 | 0.28 | 0.04 |
| 2384 | SGYDTQAI               | 23 | -0.11 | 0.65 | 0.65 | -0.59 | 0.27 | -0.07 | 0.83 | -4   | 3.51 | 2566.03 | 0.93 | 0.35 | 0.04 |
| 2385 | YDTQAI                 | 23 | -0.13 | 0.66 | 0.66 | -0.71 | 0.27 | -0.07 | 0.87 | -4   | 3.51 | 2593.06 | 0.83 | 0.37 | 0.05 |
| 2386 | /DTQAI                 | 23 | -0.19 | 0.66 | 0.66 | -0.86 | 0.43 | 0.06  | 0.96 | -3   | 4.01 | 2664.18 | 0.93 | 0.36 | 0.05 |
| 2387 | DTQAI                  | 23 | -0.16 | 0.65 | 0.65 | -0.64 | 0.43 | 0.08  | 0.91 | -3   | 4.01 | 2614.17 | 0.94 | 0.40 | 0.08 |
| 2388 | QAI                    | 23 | -0.12 | 0.64 | 0.64 | -0.53 | 0.43 | -0.2  | 0.91 | -2   | 4.26 | 2685.3  | 0.98 | 0.37 | 0.06 |
| 2389 | AI                     | 23 | -0.11 | 0.64 | 0.64 | -0.39 | 0.43 | -0.23 | 0.87 | -2   | 4.26 | 2687.33 | 0.98 | 0.37 | 0.09 |
| 2390 | AI                     | 23 | -0.12 | 0.64 | 0.64 | -0.4  | 0.54 | -0.1  | 0.87 | -1   | 4.79 | 2687.37 | 0.80 | 0.43 | 0.12 |
| 2391 | AI                     | 23 | -0.15 | 0.65 | 0.65 | -0.52 | 0.54 | -0.07 | 0.91 | -1   | 4.79 | 2703.37 | 0.87 | 0.42 | 0.05 |
| 2392 | AI                     | 23 | -0.19 | 0.64 | 0.64 | -0.75 | 0.54 | 0.02  | 0.96 | -1   | 4.79 | 2677.28 | 0.98 | 0.43 | 0.04 |
| 2393 | AI                     | 23 | -0.24 | 0.64 | 0.64 | -1.08 | 0.59 | 0.1   | 1.04 | -1   | 4.79 | 2706.28 | 0.80 | 0.42 | 0.05 |
| 2394 | AI                     | 23 | -0.19 | 0.64 | 0.64 | -0.75 | 0.54 | -0.1  | 1    | 0    | 6.45 | 2676.3  | 0.87 | 0.42 | 0.03 |
| 2395 | AI                     | 23 | -0.17 | 0.62 | 0.62 | -0.67 | 0.54 | -0.11 | 0.91 | 0    | 6.45 | 2659.31 | 0.99 | 0.44 | 0.04 |
| 2396 | AI                     | 23 | -0.17 | 0.62 | 0.62 | -0.67 | 0.59 | -0.11 | 0.91 | 0    | 6.45 | 2673.34 | 0.61 | 0.45 | 0.05 |
| 2397 | AI                     | 23 | -0.15 | 0.61 | 0.61 | -0.55 | 0.54 | -0.23 | 0.91 | 1    | 8.51 | 2631.3  | 0.99 | 0.46 | 0.02 |
| 2398 | AI                     | 23 | -0.22 | 0.62 | 0.62 | -0.71 | 0.64 | -0.11 | 1.04 | 2    | 9.25 | 2700.41 | 0.99 | 0.45 | 0.04 |
| 2399 | AI                     | 23 | -0.24 | 0.63 | 0.63 | -0.83 | 0.64 | -0.08 | 1.09 | 2    | 9.25 | 2713.41 | 0.61 | 0.44 | 0.09 |
| 2400 | AI                     | 23 | -0.18 | 0.63 | 0.63 | -0.48 | 0.59 | -0.29 | 1.04 | 3    | 9.8  | 2697.46 | 0.99 | 0.40 | 0.09 |
| 2401 | AI                     | 23 | -0.18 | 0.62 | 0.62 | -0.32 | 0.59 | -0.23 | 1    | 3    | 9.53 | 2637.42 | 0.98 | 0.40 | 0.69 |
| 2402 | AI                     | 23 | -0.22 | 0.63 | 0.63 | -0.45 | 0.59 | -0.1  | 1.04 | 2    | 8.98 | 2695.45 | 0.94 | 0.41 | 0.15 |
| 2403 | AI                     | 23 | -0.21 | 0.64 | 0.64 | -0.42 | 0.59 | -0.1  | 1.04 | 2    | 8.98 | 2695.45 | 0.61 | 0.42 | 0.09 |
| 2404 | AI                     | 23 | -0.25 | 0.63 | 0.63 | -0.58 | 0.59 | 0.02  | 1.09 | 2    | 8.98 | 2635.35 | 0.99 | 0.47 | 0.08 |
| 2405 | AI                     | 23 | -0.22 | 0.63 | 0.63 | -0.32 | 0.53 | -0.03 | 1    | 2    | 8.77 | 2610.35 | 0.97 | 0.44 | 0.33 |
| 2406 | AI                     | 23 | -0.28 | 0.63 | 0.63 | -0.67 | 0.53 | 0.17  | 1.04 | 1    | 8.24 | 2612.27 | 0.99 | 0.41 | 0.21 |
| 2407 | AI                     | 23 | -0.32 | 0.63 | 0.63 | -0.8  | 0.69 | 0.29  | 1.09 | 2    | 8.75 | 2653.37 | 0.99 | 0.40 | 0.60 |
| 2408 | AI                     | 23 | -0.26 | 0.63 | 0.63 | -0.53 | 0.69 | 0.17  | 1    | 2    | 8.75 | 2686.44 | 0.99 | 0.40 | 0.83 |
| 2409 | AI                     | 23 | -0.19 | 0.63 | 0.63 | -0.19 | 0.53 | -0.03 | 0.91 | 1    | 8.24 | 2671.43 | 0.97 | 0.43 | 0.78 |
| 2410 | AI                     | 23 | -0.24 | 0.64 | 0.64 | -0.51 | 0.53 | 0.17  | 0.96 | 0    | 6.3  | 2673.35 | 0.97 | 0.32 | 0.52 |
| 2411 | AI                     | 23 | -0.29 | 0.65 | 0.65 | -0.62 | 0.53 | 0.45  | 0.96 | -1   | 4.58 | 2602.22 | 0.86 | 0.29 | 0.13 |
| 2412 | AI                     | 23 | -0.32 | 0.65 | 0.65 | -0.88 | 0.53 | 0.63  | 1    | -2   | 4.29 | 2614.17 | 0.99 | 0.29 | 0.08 |
| 2413 | AI                     | 23 | -0.25 | 0.65 | 0.65 | -0.52 | 0.37 | 0.42  | 0.91 | -3   | 3.98 | 2599.16 | 0.99 | 0.30 | 0.08 |
| 2414 | AI                     | 23 | -0.24 | 0.65 | 0.65 | -0.51 | 0.37 | 0.39  | 0.91 | -3   | 3.98 | 2613.19 | 0.99 | 0.31 | 0.07 |
| 2415 | AI                     | 23 | -0.26 | 0.66 | 0.66 | -0.63 | 0.37 | 0.5   | 0.91 | -4   | 3.86 | 2641.2  | 0.98 | 0.28 | 0.06 |
| 2416 | AI                     | 23 | -0.26 | 0.67 | 0.67 | -0.63 | 0.32 | 0.63  | 0.87 | -5   | 3.77 | 2628.15 | 0.98 | 0.27 | 0.06 |
| 2417 | AI                     | 23 | -0.25 | 0.67 | 0.67 | -0.62 | 0.32 | 0.61  | 0.87 | -5   | 3.77 | 2642.18 | 0.87 | 0.27 | 0.13 |
| 2418 | AI                     | 23 | -0.24 | 0.69 | 0.69 | -0.47 | 0.32 | 0.56  | 0.87 | -5   | 3.77 | 2676.26 | 0.99 | 0.31 | 0.13 |
| 2419 | AI                     | 23 | -0.21 | 0.68 | 0.68 | -0.2  | 0.27 | 0.5   | 0.78 | -5   | 3.77 | 2651.26 | 0.99 | 0.32 | 0.08 |
| 2420 | AI                     | 23 | -0.19 | 0.68 | 0.68 | -0.09 | 0.27 | 0.47  | 0.74 | -5   | 3.77 | 2635.26 | 0.98 | 0.32 | 0.09 |
| 2421 | AI                     | 23 | -0.16 | 0.68 | 0.68 | -0.07 | 0.32 | 0.47  | 0.65 | -5   | 3.77 | 2607.25 | 0.99 | 0.30 | 0.09 |
| 2422 | AI                     | 23 | -0.18 | 0.68 | 0.68 | -0.08 | 0.48 | 0.59  | 0.65 | -4   | 4    | 2621.32 | 0.98 | 0.34 | 0.34 |
| 2423 | AI                     | 23 | -0.18 | 0.68 | 0.68 | -0.08 | 0.48 | 0.59  | 0.65 | -4   | 4    | 2621.32 | 0.80 | 0.35 | 0.08 |
| 2424 | AI                     | 23 | -0.16 | 0.67 | 0.67 | -0.03 | 0.48 | 0.56  | 0.65 | -4   | 4    | 2631.35 | 0.61 | 0.39 | 0.12 |
| 2425 | AI                     | 23 | -0.16 | 0.67 | 0.67 | -0.03 | 0.48 | 0.56  | 0.65 | -4   | 4    | 2631.35 | 0.98 | 0.38 | 0.14 |
| 2426 | AI                     | 23 | -0.16 | 0.67 | 0.67 | -0.03 | 0.48 | 0.56  | 0.65 | -4   | 4    | 2631.35 | 0.98 | 0.39 | 0.06 |
| 2427 | AI                     | 23 | -0.19 | 0.68 | 0.68 | -0.16 | 0.64 | 0.67  | 0.7  | -3   | 4.22 | 2672.45 | 0.80 | 0.36 | 0.10 |
| 2428 | AI                     | 23 | -0.19 | 0.68 | 0.68 | -0.29 | 0.64 | 0.72  | 0.7  | -3   | 4.22 | 2626.37 | 0.80 | 0.39 | 0.12 |
| 2429 | AI                     | 23 | -0.12 | 0.68 | 0.68 | 0.06  | 0.64 | 0.51  | 0.65 | -2   | 4.4  | 2624.45 | 0.98 | 0.39 | 0.06 |
| 2430 | AI                     | 23 | -0.11 | 0.68 | 0.68 | 0.08  | 0.48 | 0.51  | 0.61 | -4   | 4    | 2611.36 | 0.61 | 0.39 | 0.04 |



|      |                          |    |       |      |      |       |      |       |      |      |       |         |      |      |      |
|------|--------------------------|----|-------|------|------|-------|------|-------|------|------|-------|---------|------|------|------|
| 2431 | LDDDDITDDIMCAKKILDIKGIDY | 23 | -0.13 | 0.68 | 0.68 | -0.1  | 0.48 | 0.52  | 0.65 | -4   | 4     | 2627.36 | 0.98 | 0.36 | 0.04 |
| 2432 | DDDDITDDIMCAKKILDIKGIDYW | 23 | -0.14 | 0.68 | 0.68 | -0.3  | 0.48 | 0.45  | 0.7  | -4   | 4     | 2700.41 | 0.80 | 0.47 | 0.03 |
| 2433 | DDITDDIMCAKKILDIKGIDYWL  | 23 | -0.09 | 0.67 | 0.67 | 0.01  | 0.48 | 0.24  | 0.65 | -3   | 4.12  | 2698.49 | 0.94 | 0.48 | 0.03 |
| 2434 | DITDDIMCAKKILDIKGIDYWLA  | 23 | -0.04 | 0.66 | 0.66 | 0.24  | 0.48 | 0.09  | 0.61 | -2   | 4.29  | 2654.48 | 0.80 | 0.53 | 0.06 |
| 2435 | ITDDIMCAKKILDIKGIDYWLAH  | 23 | -0.03 | 0.63 | 0.63 | 0.26  | 0.54 | -0.07 | 0.61 | -0.5 | 5.37  | 2676.54 | 0.93 | 0.53 | 0.06 |
| 2436 | TDDIMCAKKILDIKGIDYWLAAH  | 23 | -0.11 | 0.63 | 0.63 | -0.11 | 0.7  | 0.14  | 0.7  | 0.5  | 7.05  | 2691.55 | 0.93 | 0.51 | 0.10 |
| 2437 | DDIMCAKKILDIKGIDYWLAAHA  | 23 | -0.09 | 0.63 | 0.63 | 0     | 0.7  | 0.14  | 0.65 | 0.5  | 7.05  | 2661.52 | 0.94 | 0.56 | 0.76 |
| 2438 | DIMCAKKILDIKGIDYWLAAHAL  | 23 | -0.04 | 0.62 | 0.62 | 0.32  | 0.7  | -0.07 | 0.61 | 1.5  | 8.46  | 2659.6  | 0.94 | 0.56 | 0.95 |
| 2439 | IMCAKKILDIKGIDYWLAAHALC  | 23 | 0     | 0.61 | 0.61 | 0.58  | 0.7  | -0.24 | 0.57 | 2.5  | 8.87  | 2647.65 | 0.93 | 0.52 | 0.98 |
| 2440 | MCAKKILDIKGIDYWLAAHALCT  | 23 | -0.04 | 0.61 | 0.61 | 0.35  | 0.7  | -0.18 | 0.61 | 2.5  | 8.87  | 2635.59 | 0.93 | 0.54 | 0.98 |
| 2441 | CAKKILDIKGIDYWLAAHALCTE  | 23 | -0.08 | 0.6  | 0.6  | 0.12  | 0.76 | 0     | 0.65 | 1.5  | 8.32  | 2633.51 | 0.69 | 0.53 | 0.97 |
| 2442 | AKKILDIKGIDYWLAAHALCTEK  | 23 | -0.13 | 0.6  | 0.6  | -0.16 | 0.92 | 0.18  | 0.74 | 2.5  | 9.05  | 2658.55 | 0.94 | 0.55 | 0.90 |
| 2443 | KKILDIKGIDYWLAAHALCTEKL  | 23 | -0.12 | 0.6  | 0.6  | -0.07 | 0.92 | 0.12  | 0.74 | 2.5  | 9.05  | 2700.64 | 0.98 | 0.51 | 0.70 |
| 2444 | KILDIKGIDYWLAAHALCTEKLE  | 23 | -0.1  | 0.6  | 0.6  | -0.06 | 0.81 | 0.12  | 0.7  | 0.5  | 7.06  | 2701.58 | 0.98 | 0.52 | 0.04 |
| 2445 | ILDIKGIDYWLAAHALCTEKLEQ  | 23 | -0.08 | 0.6  | 0.6  | -0.04 | 0.71 | 0     | 0.7  | -0.5 | 5.5   | 2701.54 | 0.93 | 0.47 | 0.04 |
| 2446 | .DIKGIDYWLAAHALCTEKLEQV  | 23 | -0.1  | 0.6  | 0.6  | -0.27 | 0.71 | -0.07 | 0.74 | -0.5 | 5.5   | 2774.59 | 0.98 | 0.42 | 0.06 |
| 2447 | IKGIDYWLAAHALCTEKLEQWI   | 23 | -0.1  | 0.6  | 0.6  | -0.27 | 0.71 | -0.07 | 0.74 | -0.5 | 5.5   | 2774.59 | 0.94 | 0.45 | 0.09 |
| 2448 | KGIDYWLAAHALCTEKLEQWLC   | 23 | -0.06 | 0.59 | 0.59 | -0.01 | 0.71 | -0.24 | 0.7  | 0.5  | 7.03  | 2762.64 | 0.93 | 0.45 | 0.51 |
| 2449 | GIDYWLAAHALCTEKLEQWLC    | 23 | -0.12 | 0.59 | 0.59 | -0.36 | 0.76 | -0.03 | 0.74 | -0.5 | 5.54  | 2778.59 | 0.93 | 0.46 | 0.09 |
| 2450 | IDYWLAAHALCTEKLEQWLCE    | 23 | -0.12 | 0.59 | 0.59 | -0.36 | 0.76 | -0.03 | 0.74 | -0.5 | 5.54  | 2778.59 | 0.83 | 0.40 | 0.09 |
| 2451 | DYWLAAHALCTEKLEQWLCEK    | 23 | -0.11 | 0.58 | 0.58 | -0.18 | 0.76 | -0.11 | 0.74 | -0.5 | 5.54  | 2834.7  | 0.93 | 0.44 | 0.43 |
| 2452 | IRFFVPLFLVGLFPAILAKQFTI  | 24 | 0.15  | 0.62 | 0.62 | 1.33  | 0.46 | -0.83 | 0.46 | 3    | 11.17 | 2797.9  | 0.98 | 0.60 | 0.94 |
| 2453 | RFVPLFLVGLFPAILAKQFTK    | 24 | 0.14  | 0.61 | 0.61 | 1.36  | 0.46 | -0.81 | 0.46 | 3    | 10.07 | 2769.84 | 0.98 | 0.59 | 0.98 |
| 2454 | FVPLFLVGLFPAILAKQFTKCE   | 24 | 0.19  | 0.61 | 0.61 | 1.4   | 0.41 | -0.81 | 0.33 | 1    | 8.54  | 2742.77 | 0.94 | 0.58 | 0.98 |
| 2455 | VPLFLVGLFPAILAKQFTKCEI   | 24 | 0.19  | 0.61 | 0.61 | 1.44  | 0.41 | -0.78 | 0.33 | 1    | 8.54  | 2708.76 | 0.94 | 0.52 | 0.95 |
| 2456 | PLFLVGLFPAILAKQFTKCELS   | 24 | 0.15  | 0.6  | 0.6  | 1.29  | 0.41 | -0.67 | 0.38 | 1    | 8.54  | 2648.66 | 0.93 | 0.48 | 0.57 |
| 2457 | LFLVGLFPAILAKQFTKCELS    | 24 | 0.1   | 0.6  | 0.6  | 0.97  | 0.46 | -0.6  | 0.46 | 1    | 8.54  | 2677.66 | 0.98 | 0.46 | 0.66 |
| 2458 | .FLVGLFPAILAKQFTKCELSQI  | 24 | 0.13  | 0.61 | 0.61 | 1.2   | 0.46 | -0.67 | 0.46 | 1    | 8.54  | 2693.71 | 0.93 | 0.47 | 0.35 |
| 2459 | LVGLFPAILAKQFTKCELSQLI   | 24 | 0.13  | 0.61 | 0.61 | 1.2   | 0.46 | -0.67 | 0.46 | 1    | 8.54  | 2693.71 | 0.94 | 0.43 | 0.88 |
| 2460 | VGLFPAILAKQFTKCELSQLLI   | 24 | 0.05  | 0.6  | 0.6  | 0.92  | 0.62 | -0.44 | 0.54 | 2    | 9.25  | 2674.71 | 0.93 | 0.41 | 0.72 |
| 2461 | GILFPAILAKQFTKCELSQLLI   | 24 | 0     | 0.61 | 0.61 | 0.61  | 0.62 | -0.24 | 0.58 | 1    | 8.51  | 2676.63 | 0.93 | 0.44 | 0.93 |
| 2462 | ILFPAILAKQFTKCELSQLLKD   | 24 | 0.01  | 0.61 | 0.61 | 0.63  | 0.62 | -0.25 | 0.58 | 1    | 8.51  | 2690.66 | 0.83 | 0.45 | 0.91 |
| 2463 | ILFPAILAKQFTKCELSQLLKDI  | 24 | -0.03 | 0.62 | 0.62 | 0.5   | 0.62 | -0.13 | 0.62 | 0    | 6.43  | 2748.69 | 0.93 | 0.45 | 0.74 |
| 2464 | .FPAILAKQFTKCELSQLLKDID  | 24 | -0.05 | 0.62 | 0.62 | 0.29  | 0.62 | -0.05 | 0.62 | 0    | 6.43  | 2692.58 | 0.93 | 0.42 | 0.21 |
| 2465 | PAILAKQFTKCELSQLLKDIDG   | 24 | -0.07 | 0.62 | 0.62 | 0.08  | 0.62 | -0.07 | 0.67 | 0    | 6.43  | 2742.59 | 0.94 | 0.35 | 0.09 |
| 2466 | AILAKQFTKCELSQLLKDIDGY   | 24 | -0.09 | 0.62 | 0.62 | -0.05 | 0.62 | 0.03  | 0.67 | 0    | 6.43  | 2652.47 | 0.93 | 0.36 | 0.11 |
| 2467 | ILAKQFTKCELSQLLKDIDGYG   | 24 | -0.08 | 0.64 | 0.64 | 0     | 0.62 | 0.03  | 0.67 | 0    | 6.43  | 2612.41 | 0.80 | 0.36 | 0.05 |
| 2468 | .AKQFTKCELSQLLKDIDGYGG   | 24 | -0.06 | 0.64 | 0.64 | 0.11  | 0.62 | -0.02 | 0.67 | 0    | 6.43  | 2654.5  | 0.98 | 0.35 | 0.04 |
| 2469 | AKQFTKCELSQLLKDIDGYGGI   | 24 | -0.08 | 0.64 | 0.64 | 0     | 0.62 | 0.03  | 0.67 | 0    | 6.43  | 2612.41 | 0.98 | 0.35 | 0.30 |
| 2470 | KQFTKCELSQLLKDIDGYGGIA   | 24 | -0.08 | 0.64 | 0.64 | 0     | 0.62 | 0.03  | 0.67 | 0    | 6.43  | 2612.41 | 0.61 | 0.37 | 0.04 |
| 2471 | QFTKCELSQLLKDIDGYGGIAL   | 24 | -0.09 | 0.63 | 0.63 | -0.15 | 0.62 | 0.05  | 0.67 | 0    | 6.43  | 2638.45 | 0.99 | 0.38 | 0.10 |
| 2472 | FTKCELSQLLKDIDGYGGIALP   | 24 | -0.07 | 0.63 | 0.63 | -0.13 | 0.52 | 0.05  | 0.62 | -2   | 4.32  | 2639.39 | 0.94 | 0.36 | 0.04 |
| 2473 | TKCELSQLLKDIDGYGGIALPE   | 24 | -0.02 | 0.62 | 0.62 | 0.17  | 0.46 | -0.03 | 0.54 | -2   | 4.32  | 2624.42 | 0.86 | 0.36 | 0.04 |
| 2474 | KCELSQLLKDIDGYGGIALPEL   | 24 | -0.02 | 0.62 | 0.62 | 0.25  | 0.46 | 0     | 0.54 | -2   | 4.32  | 2590.41 | 0.99 | 0.38 | 0.04 |
| 2475 | .CELSQLLKDIDGYGGIALPELI  | 24 | -0.01 | 0.63 | 0.63 | 0.38  | 0.46 | -0.03 | 0.5  | -2   | 4.32  | 2592.44 | 0.99 | 0.37 | 0.13 |
| 2476 | ELSQLLKDIDGYGGIALPELIC   | 24 | 0.03  | 0.62 | 0.62 | 0.51  | 0.31 | -0.17 | 0.46 | -3   | 3.92  | 2565.37 | 0.86 | 0.35 | 0.04 |
| 2477 | LSQLLKDIDGYGGIALPELIC    | 24 | 0.04  | 0.63 | 0.63 | 0.49  | 0.31 | -0.18 | 0.46 | -3   | 3.92  | 2593.43 | 0.61 | 0.36 | 0.05 |
| 2478 | .SQLLKDIDGYGGIALPELICMI  | 24 | 0.09  | 0.63 | 0.63 | 0.75  | 0.26 | -0.41 | 0.42 | -2   | 4.03  | 2611.49 | 0.97 | 0.35 | 0.03 |
| 2479 | QLLKDIDGYGGIALPELICMFI   | 24 | 0.05  | 0.61 | 0.61 | 0.46  | 0.32 | -0.36 | 0.46 | -1.5 | 4.54  | 2635.47 | 0.97 | 0.40 | 0.04 |
| 2480 | LLKIDIDGYGGIALPELICMFH   | 24 | 0.05  | 0.61 | 0.61 | 0.46  | 0.32 | -0.39 | 0.46 | -1.5 | 4.54  | 2649.5  | 0.94 | 0.40 | 0.04 |
| 2481 | .LKIDIDGYGGIALPELICMFHT  | 24 | 0.07  | 0.6  | 0.6  | 0.58  | 0.27 | -0.38 | 0.42 | -1.5 | 4.54  | 2608.44 | 0.99 | 0.37 | 0.03 |
| 2482 | KIDIDGYGGIALPELICMFHTS   | 24 | 0.06  | 0.61 | 0.61 | 0.4   | 0.27 | -0.31 | 0.42 | -1.5 | 4.54  | 2552.33 | 0.93 | 0.34 | 0.03 |
| 2483 | DIDGYGGIALPELICMFHTSG    | 24 | 0.04  | 0.61 | 0.61 | 0.19  | 0.27 | -0.33 | 0.46 | -1.5 | 4.54  | 2602.34 | 0.98 | 0.33 | 0.04 |
| 2484 | IDGYGGIALPELICMFHTSGY    | 24 | 0.05  | 0.62 | 0.62 | 0.2   | 0.11 | -0.33 | 0.42 | -3.5 | 3.84  | 2589.25 | 0.94 | 0.33 | 0.04 |
| 2485 | JGYGGIALPELICMFHTSGYD    | 24 | 0.07  | 0.61 | 0.61 | 0.32  | 0.11 | -0.47 | 0.42 | -2.5 | 4.03  | 2575.27 | 0.93 | 0.29 | 0.09 |
| 2486 | GYGGIALPELICMFHTSGYDT    | 24 | 0.01  | 0.61 | 0.61 | -0.01 | 0.17 | -0.39 | 0.5  | -2.5 | 4.03  | 2590.24 | 0.94 | 0.29 | 0.04 |
| 2487 | YGGIALPELICMFHTSGYDTC    | 24 | 0.05  | 0.6  | 0.6  | 0.21  | 0.17 | -0.53 | 0.46 | -1.5 | 4.36  | 2546.23 | 0.83 | 0.28 | 0.22 |
| 2488 | GGIALPELICMFHTSGYDTQA    | 24 | 0.08  | 0.6  | 0.6  | 0.41  | 0.17 | -0.61 | 0.46 | -1.5 | 4.36  | 2602.34 | 0.93 | 0.28 | 0.07 |
| 2489 | GIALPELICMFHTSGYDTQAI    | 24 | 0.1   | 0.6  | 0.6  | 0.64  | 0.17 | -0.57 | 0.42 | -1.5 | 4.36  | 2538.3  | 0.83 | 0.32 | 0.11 |
| 2490 | IALPELICMFHTSGYDTQAIVE   | 24 | 0.07  | 0.6  | 0.6  | 0.51  | 0.22 | -0.45 | 0.46 | -2.5 | 4.14  | 2610.36 | 0.95 | 0.32 | 0.15 |
| 2491 | ALPELICMFHTSGYDTQAIVEI   | 24 | 0.03  | 0.6  | 0.6  | 0.38  | 0.22 | -0.44 | 0.54 | -2.5 | 4.14  | 2667.41 | 0.93 | 0.33 | 0.04 |
| 2492 | LPELICMFHTSGYDTQAIVEN    | 24 | -0.02 | 0.6  | 0.6  | 0.05  | 0.22 | -0.36 | 0.62 | -2.5 | 4.14  | 2668.35 | 0.80 | 0.34 | 0.03 |
| 2493 | PELICMFHTSGYDTQAIVENN    | 24 | -0.06 | 0.61 | 0.61 | -0.17 | 0.27 | -0.21 | 0.67 | -3.5 | 4     | 2726.39 | 0.93 | 0.33 | 0.04 |
| 2494 | ELICTMFHTSGYDTQAIVENNE   | 24 | -0.09 | 0.61 | 0.61 | -0.36 | 0.27 | -0.12 | 0.71 | -3.5 | 4     | 2700.3  | 0.63 | 0.27 | 0.05 |

|      |                          |    |       |      |      |       |      |       |      |      |      |         |      |      |      |
|------|--------------------------|----|-------|------|------|-------|------|-------|------|------|------|---------|------|------|------|
| 2495 | LICTMFHTSGYDTQAIVENNES   | 24 | -0.1  | 0.62 | 0.62 | -0.32 | 0.27 | -0.14 | 0.75 | -3.5 | 4    | 2704.29 | 0.80 | 0.30 | 0.03 |
| 2496 | ICTMFHTSGYDTQAIVENNEST   | 24 | -0.1  | 0.62 | 0.62 | -0.33 | 0.27 | -0.14 | 0.75 | -3.5 | 4    | 2704.29 | 0.93 | 0.34 | 0.03 |
| 2497 | TMFHTSGYDTQAIVENNESTE    | 24 | -0.12 | 0.62 | 0.62 | -0.54 | 0.27 | -0.16 | 0.79 | -3.5 | 4    | 2754.3  | 0.98 | 0.35 | 0.06 |
| 2498 | MFHTSGYDTQAIVENNESTEY    | 24 | -0.14 | 0.62 | 0.62 | -0.74 | 0.27 | -0.09 | 0.79 | -3.5 | 4    | 2698.19 | 0.94 | 0.35 | 0.04 |
| 2499 | MFHTSGYDTQAIVENNESTEYC   | 24 | -0.12 | 0.62 | 0.62 | -0.69 | 0.27 | -0.12 | 0.79 | -3.5 | 4    | 2708.22 | 0.93 | 0.36 | 0.03 |
| 2500 | FHTSGYDTQAIVENNESTEYGI   | 24 | -0.09 | 0.63 | 0.63 | -0.54 | 0.27 | -0.21 | 0.75 | -3.5 | 4    | 2754.29 | 0.93 | 0.36 | 0.04 |
| 2501 | FTSGYDTQAIVENNESTEYGLF   | 24 | -0.13 | 0.62 | 0.62 | -0.77 | 0.32 | -0.15 | 0.83 | -3.5 | 4    | 2751.23 | 0.94 | 0.34 | 0.04 |
| 2502 | TSGYDTQAIVENNESTEYGLFC   | 24 | -0.12 | 0.62 | 0.62 | -0.7  | 0.32 | -0.12 | 0.83 | -3.5 | 4    | 2717.22 | 0.93 | 0.30 | 0.04 |
| 2503 | SGYDTQAIVENNESTEYGLFOI   | 24 | -0.12 | 0.64 | 0.64 | -0.6  | 0.26 | -0.08 | 0.83 | -4   | 3.51 | 2667.15 | 0.93 | 0.30 | 0.05 |
| 2504 | GYDTQAIVENNESTEYGLFQIS   | 24 | -0.14 | 0.65 | 0.65 | -0.71 | 0.26 | -0.06 | 0.88 | -4   | 3.51 | 2680.15 | 0.93 | 0.35 | 0.04 |
| 2505 | YDTQAIVENNESTEYGLFQISN   | 24 | -0.17 | 0.66 | 0.66 | -0.84 | 0.42 | 0.05  | 0.92 | -3   | 4.01 | 2721.25 | 0.83 | 0.37 | 0.08 |
| 2506 | DTQAIVENNESTEYGLFQISNK   | 24 | -0.16 | 0.65 | 0.65 | -0.67 | 0.42 | -0.02 | 0.92 | -3   | 4.01 | 2777.36 | 0.93 | 0.41 | 0.08 |
| 2507 | TQAIVENNESTEYGLFQISNKL   | 24 | -0.14 | 0.65 | 0.65 | -0.65 | 0.42 | -0.07 | 0.92 | -3   | 4.01 | 2800.4  | 0.94 | 0.40 | 0.06 |
| 2508 | QAIVENNESTEYGLFQISNKLW   | 24 | -0.11 | 0.64 | 0.64 | -0.4  | 0.42 | -0.23 | 0.88 | -2   | 4.26 | 2788.45 | 0.93 | 0.38 | 0.12 |
| 2509 | AIVENNESTEYGLFQISNKLWC   | 24 | -0.15 | 0.65 | 0.65 | -0.53 | 0.57 | -0.09 | 0.92 | -1   | 4.79 | 2815.52 | 0.98 | 0.40 | 0.12 |
| 2510 | IVENNESTEYGLFQISNKLWCK   | 24 | -0.13 | 0.64 | 0.64 | -0.42 | 0.52 | -0.09 | 0.88 | -1   | 4.79 | 2774.46 | 0.80 | 0.44 | 0.05 |
| 2511 | ENNESTEYGLFQISNKLWCKS    | 24 | -0.15 | 0.64 | 0.64 | -0.53 | 0.52 | -0.05 | 0.92 | -1   | 4.79 | 2770.46 | 0.87 | 0.44 | 0.04 |
| 2512 | NNESTEYGLFQISNKLWCKSE    | 24 | -0.21 | 0.64 | 0.64 | -0.86 | 0.57 | 0.03  | 1    | -1   | 4.79 | 2805.43 | 0.98 | 0.43 | 0.04 |
| 2513 | NNESTEYGLFQISNKLWCKSSC   | 24 | -0.21 | 0.64 | 0.64 | -0.86 | 0.57 | 0.03  | 1    | -1   | 4.79 | 2805.43 | 0.80 | 0.42 | 0.06 |
| 2514 | NESTEYGLFQISNKLWCKSSQ    | 24 | -0.19 | 0.63 | 0.63 | -0.78 | 0.52 | -0.1  | 0.96 | 0    | 6.45 | 2773.43 | 0.94 | 0.42 | 0.03 |
| 2515 | ESTEYGLFQISNKLWCKSSQVF   | 24 | -0.19 | 0.62 | 0.62 | -0.78 | 0.57 | -0.1  | 0.96 | 0    | 6.45 | 2787.46 | 0.99 | 0.41 | 0.04 |
| 2516 | TEYGLFQISNKLWCKSSQVPC    | 24 | -0.17 | 0.61 | 0.61 | -0.67 | 0.57 | -0.09 | 0.92 | 0    | 6.45 | 2760.43 | 0.61 | 0.45 | 0.03 |
| 2517 | EYGLFQISNKLWCKSSQVPQ     | 24 | -0.22 | 0.61 | 0.61 | -0.71 | 0.62 | -0.09 | 1.04 | 2    | 9.25 | 2787.5  | 0.97 | 0.45 | 0.04 |
| 2518 | YGLFQISNKLWCKSSQVPQSF    | 24 | -0.24 | 0.62 | 0.62 | -0.83 | 0.62 | -0.1  | 1.08 | 2    | 9.25 | 2814.53 | 0.97 | 0.44 | 0.03 |
| 2519 | YGLFQISNKLWCKSSQVPQSR    | 24 | -0.2  | 0.63 | 0.63 | -0.61 | 0.62 | -0.15 | 1.04 | 2    | 9.25 | 2826.59 | 0.61 | 0.40 | 0.04 |
| 2520 | LQISNKLWCKSSQVPQSRN      | 24 | -0.17 | 0.63 | 0.63 | -0.36 | 0.56 | -0.32 | 1    | 3    | 9.42 | 2800.61 | 0.99 | 0.40 | 0.59 |
| 2521 | LFQISNKLWCKSSQVPQSRNIC   | 24 | -0.2  | 0.63 | 0.63 | -0.45 | 0.56 | -0.1  | 1    | 2    | 8.98 | 2752.52 | 0.93 | 0.42 | 0.65 |
| 2522 | FQISNKLWCKSSQVPQSRNICI   | 24 | -0.18 | 0.63 | 0.63 | -0.25 | 0.56 | -0.17 | 1    | 2    | 8.98 | 2808.63 | 0.94 | 0.41 | 0.12 |
| 2523 | QISNKLWCKSSQVPQSRNICDI   | 24 | -0.21 | 0.63 | 0.63 | -0.44 | 0.56 | -0.09 | 1.04 | 2    | 8.98 | 2782.54 | 0.61 | 0.43 | 0.09 |
| 2524 | ISNKLWCKSSQVPQSRNICDIS   | 24 | -0.24 | 0.63 | 0.63 | -0.45 | 0.56 | -0.02 | 1.04 | 2    | 8.77 | 2738.5  | 0.99 | 0.42 | 0.44 |
| 2525 | INKLWCKSSQVPQSRNICDISC   | 24 | -0.24 | 0.63 | 0.63 | -0.45 | 0.51 | 0.09  | 1    | 1    | 8.24 | 2725.45 | 0.97 | 0.41 | 0.15 |
| 2526 | NKLWCKSSQVPQSRNICDISCI   | 24 | -0.31 | 0.63 | 0.63 | -0.8  | 0.66 | 0.29  | 1.08 | 2    | 8.75 | 2740.46 | 0.97 | 0.38 | 0.37 |
| 2527 | KLWCKSSQVPQSRNICDISCD    | 24 | -0.28 | 0.64 | 0.64 | -0.65 | 0.66 | 0.18  | 1.04 | 2    | 8.75 | 2800.56 | 0.99 | 0.41 | 0.68 |
| 2528 | LWCKSSQVPQSRNICDISCDK    | 24 | -0.23 | 0.63 | 0.63 | -0.35 | 0.66 | 0.09  | 0.96 | 2    | 8.75 | 2799.62 | 0.99 | 0.42 | 0.90 |
| 2529 | MCKSSQVPQSRNICDISCDKFL   | 24 | -0.21 | 0.63 | 0.63 | -0.33 | 0.51 | 0.09  | 0.92 | 0    | 6.3  | 2786.53 | 0.97 | 0.31 | 0.44 |
| 2530 | CKSSQVPQSRNICDISCDKFLC   | 24 | -0.26 | 0.64 | 0.64 | -0.63 | 0.51 | 0.29  | 0.96 | -1   | 4.58 | 2788.45 | 0.97 | 0.28 | 0.18 |
| 2531 | KSSQVPQSRNICDISCDKFLDD   | 24 | -0.31 | 0.65 | 0.65 | -0.74 | 0.51 | 0.56  | 0.96 | -2   | 4.29 | 2717.32 | 0.86 | 0.28 | 0.08 |
| 2532 | SSQVPQSRNICDISCDKFLDDI   | 24 | -0.28 | 0.65 | 0.65 | -0.66 | 0.51 | 0.52  | 0.96 | -2   | 4.29 | 2727.35 | 0.99 | 0.29 | 0.08 |
| 2533 | SQVPQSRNICDISCDKFLDDDI   | 24 | -0.24 | 0.65 | 0.65 | -0.53 | 0.36 | 0.38  | 0.92 | -3   | 3.98 | 2700.28 | 0.99 | 0.28 | 0.07 |
| 2534 | QVPQSRNICDISCDKFLDDDI    | 24 | -0.26 | 0.66 | 0.66 | -0.64 | 0.36 | 0.5   | 0.92 | -4   | 3.86 | 2728.29 | 0.99 | 0.27 | 0.07 |
| 2535 | VPQSRNICDISCDKFLDDDITD   | 24 | -0.28 | 0.67 | 0.67 | -0.75 | 0.36 | 0.61  | 0.92 | -5   | 3.77 | 2756.3  | 0.99 | 0.27 | 0.05 |
| 2536 | PQSRNICDISCDKFLDDDITDC   | 24 | -0.22 | 0.67 | 0.67 | -0.42 | 0.31 | 0.53  | 0.83 | -5   | 3.77 | 2741.33 | 0.98 | 0.26 | 0.09 |
| 2537 | QSRNICDISCDKFLDDDITDDII  | 24 | -0.23 | 0.67 | 0.67 | -0.51 | 0.31 | 0.53  | 0.83 | -5   | 3.77 | 2773.39 | 0.87 | 0.27 | 0.14 |
| 2538 | ISRNICDISCDKFLDDDITDDIMI | 24 | -0.23 | 0.68 | 0.68 | -0.34 | 0.31 | 0.49  | 0.83 | -5   | 3.77 | 2779.41 | 0.99 | 0.32 | 0.13 |
| 2539 | IRNICDISCDKFLDDDITDDIMC  | 24 | -0.19 | 0.68 | 0.68 | -0.12 | 0.26 | 0.46  | 0.75 | -5   | 3.77 | 2722.35 | 0.98 | 0.32 | 0.09 |
| 2540 | INICDISCDKFLDDDITDDIMCA  | 24 | -0.22 | 0.68 | 0.68 | -0.25 | 0.41 | 0.57  | 0.79 | -4   | 4    | 2763.45 | 0.99 | 0.29 | 0.12 |
| 2541 | ICDISCDKFLDDDITDDIMCAK   | 24 | -0.2  | 0.68 | 0.68 | -0.23 | 0.46 | 0.57  | 0.71 | -4   | 4    | 2735.44 | 0.98 | 0.32 | 0.25 |
| 2542 | CDISCDKFLDDDITDDIMCAKK   | 24 | -0.14 | 0.68 | 0.68 | 0.11  | 0.46 | 0.49  | 0.62 | -4   | 4    | 2734.5  | 0.98 | 0.33 | 0.20 |
| 2543 | DISCDKFLDDDITDDIMCAKKI   | 24 | -0.15 | 0.67 | 0.67 | 0.08  | 0.46 | 0.49  | 0.62 | -4   | 4    | 2734.5  | 0.94 | 0.38 | 0.20 |
| 2544 | ISCDKFLDDDITDDIMCAKKIL   | 24 | -0.18 | 0.68 | 0.68 | -0.17 | 0.46 | 0.66  | 0.67 | -5   | 3.9  | 2746.45 | 0.80 | 0.37 | 0.04 |
| 2545 | ISCDKFLDDDITDDIMCAKKILD  | 24 | -0.12 | 0.68 | 0.68 | 0.16  | 0.46 | 0.46  | 0.62 | -4   | 4    | 2744.53 | 0.93 | 0.37 | 0.04 |
| 2546 | SCDKFLDDDITDDIMCAKKILD   | 24 | -0.2  | 0.67 | 0.67 | -0.19 | 0.61 | 0.66  | 0.71 | -3   | 4.22 | 2759.54 | 0.98 | 0.35 | 0.33 |
| 2547 | DKFLDDDITDDIMCAKKILDK    | 24 | -0.18 | 0.68 | 0.68 | -0.17 | 0.61 | 0.65  | 0.67 | -3   | 4.22 | 2729.52 | 0.80 | 0.37 | 0.17 |
| 2548 | DKFLDDDITDDIMCAKKILDKG   | 24 | -0.15 | 0.68 | 0.68 | -0.09 | 0.61 | 0.61  | 0.67 | -3   | 4.22 | 2739.55 | 0.80 | 0.36 | 0.04 |
| 2549 | KFLDDDITDDIMCAKKILDKIG   | 24 | -0.15 | 0.68 | 0.68 | -0.09 | 0.61 | 0.61  | 0.67 | -3   | 4.22 | 2739.55 | 0.98 | 0.36 | 0.04 |
| 2550 | FLDDDITDDIMCAKKILDKIGID  | 24 | -0.1  | 0.69 | 0.69 | 0.02  | 0.46 | 0.39  | 0.62 | -4   | 4    | 2774.55 | 0.80 | 0.39 | 0.04 |
| 2551 | .DDDITDDIMCAKKILDKIGIDY  | 24 | -0.11 | 0.68 | 0.68 | -0.13 | 0.46 | 0.35  | 0.67 | -4   | 4    | 2813.59 | 0.98 | 0.42 | 0.04 |
| 2552 | DDDITDDIMCAKKILDKIGIDY   | 24 | -0.11 | 0.68 | 0.68 | -0.13 | 0.46 | 0.35  | 0.67 | -4   | 4    | 2813.59 | 0.80 | 0.44 | 0.03 |
| 2553 | DDITDDIMCAKKILDKIGIDY    | 24 | -0.07 | 0.67 | 0.67 | 0.09  | 0.46 | 0.21  | 0.62 | -3   | 4.12 | 2769.58 | 0.80 | 0.48 | 0.04 |
| 2554 | ITDDIMCAKKILDKIGIDY      | 24 | -0.06 | 0.64 | 0.64 | 0.1   | 0.52 | 0.06  | 0.62 | -1.5 | 4.67 | 2791.64 | 0.94 | 0.48 | 0.04 |
| 2555 | TDDIMCAKKILDKIGIDY       | 24 | -0.08 | 0.63 | 0.63 | 0.08  | 0.67 | 0.06  | 0.67 | 0.5  | 7.05 | 2804.73 | 0.97 | 0.48 | 0.10 |
| 2556 | DDIMCAKKILDKIGIDY        | 24 | -0.1  | 0.62 | 0.62 | -0.03 | 0.67 | 0.12  | 0.67 | 0.5  | 7.05 | 2762.64 | 0.93 | 0.54 | 0.30 |
| 2557 | DDIMCAKKILDKIGIDY        | 24 | -0.07 | 0.62 | 0.62 | 0.16  | 0.67 | 0.06  | 0.62 | 0.5  | 7.05 | 2774.7  | 0.94 | 0.56 | 0.53 |
| 2558 | DDIMCAKKILDKIGIDY        | 24 | -0.03 | 0.62 | 0.62 | 0.41  | 0.67 | -0.11 | 0.58 | 1.5  | 8.32 | 2762.75 | 0.94 | 0.50 | 0.96 |

|      |                         |    |       |      |      |       |      |       |      |      |       |         |      |      |      |
|------|-------------------------|----|-------|------|------|-------|------|-------|------|------|-------|---------|------|------|------|
| 2559 | MCAKKILDIKGIDYWLAKALCT  | 24 | -0.01 | 0.61 | 0.61 | 0.52  | 0.67 | -0.25 | 0.58 | 2.5  | 8.87  | 2748.77 | 0.93 | 0.52 | 0.97 |
| 2560 | CAKKILDIKGIDYWLAKALCTI  | 24 | -0.07 | 0.61 | 0.61 | 0.19  | 0.72 | -0.05 | 0.62 | 1.5  | 8.32  | 2764.72 | 0.93 | 0.51 | 0.93 |
| 2561 | AKKILDIKGIDYWLAKALCTEI  | 24 | -0.12 | 0.6  | 0.6  | -0.05 | 0.88 | 0.13  | 0.71 | 2.5  | 8.84  | 2761.7  | 0.69 | 0.52 | 0.94 |
| 2562 | KKILDIKGIDYWLAKALCTEK   | 24 | -0.1  | 0.6  | 0.6  | 0     | 0.88 | 0.1   | 0.71 | 2.5  | 9.05  | 2771.73 | 0.94 | 0.52 | 0.92 |
| 2563 | KILDIKGIDYWLAKALCTEKLE  | 24 | -0.14 | 0.61 | 0.61 | -0.22 | 0.93 | 0.24  | 0.75 | 1.5  | 8.44  | 2829.77 | 0.98 | 0.51 | 0.12 |
| 2564 | ILDIKGIDYWLAKALCTEKLEC  | 24 | -0.12 | 0.61 | 0.61 | -0.2  | 0.83 | 0.12  | 0.75 | 0.5  | 7.06  | 2829.73 | 0.98 | 0.44 | 0.05 |
| 2565 | .DIKGIDYWLAKALCTEKLEQ   | 24 | -0.06 | 0.6  | 0.6  | -0.07 | 0.68 | -0.14 | 0.71 | -0.5 | 5.5   | 2887.77 | 0.93 | 0.45 | 0.06 |
| 2566 | DIKGIDYWLAKALCTEKLEQW   | 24 | -0.07 | 0.59 | 0.59 | -0.1  | 0.68 | -0.14 | 0.71 | -0.5 | 5.5   | 2887.77 | 0.93 | 0.40 | 0.20 |
| 2567 | IKGIDYWLAKALCTEKLEQWL   | 24 | -0.09 | 0.6  | 0.6  | -0.16 | 0.68 | -0.11 | 0.71 | -0.5 | 5.5   | 2877.74 | 0.94 | 0.44 | 0.20 |
| 2568 | GIDYWLAKALCTEKLEQWLC    | 24 | -0.09 | 0.59 | 0.59 | -0.16 | 0.73 | -0.11 | 0.71 | -0.5 | 5.54  | 2891.77 | 0.93 | 0.43 | 0.08 |
| 2569 | IDYWLAKALCTEKLEQWLCE    | 24 | -0.16 | 0.59 | 0.59 | -0.51 | 0.88 | 0.09  | 0.79 | 0.5  | 7.04  | 2906.78 | 0.93 | 0.46 | 0.13 |
| 2570 | IDYWLAKALCTEKLEQWLCE    | 24 | -0.09 | 0.59 | 0.59 | -0.19 | 0.73 | -0.11 | 0.71 | -0.5 | 5.54  | 2891.77 | 0.83 | 0.44 | 0.37 |
| 2571 | RFVPLFLVGLFPAILAKQFTK   | 25 | 0.15  | 0.62 | 0.62 | 1.38  | 0.44 | -0.83 | 0.44 | 3    | 10.07 | 2901.05 | 0.93 | 0.58 | 0.94 |
| 2572 | FFVPLFLVGLFPAILAKQFTK   | 25 | 0.11  | 0.62 | 0.62 | 1.16  | 0.49 | -0.66 | 0.48 | 2    | 9.36  | 2898.97 | 0.98 | 0.59 | 0.78 |
| 2573 | FVPLFLVGLFPAILAKQFTKCE  | 25 | 0.2   | 0.61 | 0.61 | 1.5   | 0.39 | -0.85 | 0.32 | 1    | 8.54  | 2855.95 | 0.94 | 0.54 | 0.88 |
| 2574 | VPLFLVGLFPAILAKQFTKCEL  | 25 | 0.17  | 0.6  | 0.6  | 1.35  | 0.39 | -0.74 | 0.36 | 1    | 8.54  | 2795.85 | 0.94 | 0.51 | 0.94 |
| 2575 | PLFLVGLFPAILAKQFTKCELS  | 25 | 0.12  | 0.6  | 0.6  | 1.1   | 0.44 | -0.63 | 0.44 | 1    | 8.54  | 2776.81 | 0.93 | 0.47 | 0.38 |
| 2576 | LFLVGLFPAILAKQFTKCELSQ  | 25 | 0.12  | 0.6  | 0.6  | 1.08  | 0.44 | -0.64 | 0.44 | 1    | 8.54  | 2790.84 | 0.93 | 0.45 | 0.45 |
| 2577 | FLVGLFPAILAKQFTKCELSQL  | 25 | 0.14  | 0.6  | 0.6  | 1.3   | 0.44 | -0.72 | 0.44 | 1    | 8.54  | 2806.89 | 0.93 | 0.45 | 0.79 |
| 2578 | LVGLFPAILAKQFTKCELSQLL  | 25 | 0.08  | 0.61 | 0.61 | 0.99  | 0.59 | -0.52 | 0.52 | 2    | 9.25  | 2821.9  | 0.94 | 0.45 | 0.96 |
| 2579 | VGILFPAILAKQFTKCELSQLLK | 25 | 0.02  | 0.61 | 0.61 | 0.74  | 0.59 | -0.3  | 0.56 | 1    | 8.51  | 2789.81 | 0.93 | 0.44 | 0.61 |
| 2580 | IGILFPAILAKQFTKCELSQLLK | 25 | 0.03  | 0.62 | 0.62 | 0.77  | 0.59 | -0.3  | 0.56 | 1    | 8.51  | 2789.81 | 0.93 | 0.46 | 0.86 |
| 2581 | ILFPAILAKQFTKCELSQLLKDI | 25 | -0.02 | 0.62 | 0.62 | 0.46  | 0.59 | -0.12 | 0.6  | 0    | 6.43  | 2805.76 | 0.83 | 0.45 | 0.85 |
| 2582 | .FPAILAKQFTKCELSQLLKDI  | 25 | -0.02 | 0.62 | 0.62 | 0.46  | 0.59 | -0.12 | 0.6  | 0    | 6.43  | 2805.76 | 0.93 | 0.46 | 0.23 |
| 2583 | FPAILAKQFTKCELSQLLKIDIG | 25 | -0.05 | 0.62 | 0.62 | 0.23  | 0.59 | -0.14 | 0.64 | 0    | 6.43  | 2855.77 | 0.93 | 0.35 | 0.09 |
| 2584 | PAILAKQFTKCELSQLLKIDIGY | 25 | -0.06 | 0.63 | 0.63 | 0.06  | 0.59 | -0.07 | 0.64 | 0    | 6.43  | 2799.66 | 0.94 | 0.35 | 0.15 |
| 2585 | ILAKQFTKCELSQLLKIDIGYG  | 25 | -0.08 | 0.63 | 0.63 | -0.07 | 0.59 | 0.03  | 0.64 | 0    | 6.43  | 2709.54 | 0.98 | 0.36 | 0.06 |
| 2586 | ILAKQFTKCELSQLLKIDIGYG  | 25 | -0.05 | 0.64 | 0.64 | 0.18  | 0.59 | -0.04 | 0.64 | 0    | 6.43  | 2725.59 | 0.80 | 0.35 | 0.05 |
| 2587 | AKQFTKCELSQLLKIDIGYGG   | 25 | -0.05 | 0.64 | 0.64 | 0.18  | 0.59 | -0.04 | 0.64 | 0    | 6.43  | 2725.59 | 0.98 | 0.34 | 0.04 |
| 2588 | IKQFTKCELSQLLKIDIGYGGI  | 25 | -0.06 | 0.63 | 0.63 | 0.15  | 0.59 | -0.04 | 0.64 | 0    | 6.43  | 2725.59 | 0.93 | 0.37 | 0.35 |
| 2589 | QFTKCELSQLLKIDIGYGGIAL  | 25 | -0.08 | 0.63 | 0.63 | -0.07 | 0.59 | 0.03  | 0.64 | 0    | 6.43  | 2709.54 | 0.61 | 0.36 | 0.03 |
| 2590 | FTKCELSQLLKIDIGYGGIALI  | 25 | -0.12 | 0.63 | 0.63 | -0.28 | 0.64 | 0.17  | 0.68 | -1   | 4.79  | 2767.58 | 0.99 | 0.36 | 0.08 |
| 2591 | FTKCELSQLLKIDIGYGGIALPI | 25 | -0.05 | 0.63 | 0.63 | 0.03  | 0.5  | -0.02 | 0.6  | -2   | 4.32  | 2752.57 | 0.94 | 0.37 | 0.04 |
| 2592 | TKCELSQLLKIDIGYGGIALPEI | 25 | 0.01  | 0.63 | 0.63 | 0.35  | 0.45 | -0.1  | 0.52 | -2   | 4.32  | 2737.6  | 0.86 | 0.35 | 0.06 |
| 2593 | KCELSQLLKIDIGYGGIALPELI | 25 | -0.02 | 0.62 | 0.62 | 0.34  | 0.45 | -0.04 | 0.52 | -2   | 4.32  | 2693.56 | 0.99 | 0.37 | 0.11 |
| 2594 | CELSQLLKIDIGYGGIALPELIC | 25 | -0.02 | 0.62 | 0.62 | 0.34  | 0.45 | -0.04 | 0.52 | -2   | 4.32  | 2693.56 | 0.99 | 0.34 | 0.03 |
| 2595 | ELSQLLKIDIGYGGIALPELICT | 25 | 0.04  | 0.63 | 0.63 | 0.57  | 0.3  | -0.22 | 0.44 | -3   | 3.92  | 2696.58 | 0.86 | 0.34 | 0.04 |
| 2596 | LSQLLKIDIGYGGIALPELICTM | 25 | 0.06  | 0.63 | 0.63 | 0.58  | 0.3  | -0.28 | 0.44 | -3   | 3.92  | 2740.62 | 0.61 | 0.34 | 0.04 |
| 2597 | SQLLKIDIGYGGIALPELICTMF | 25 | 0.07  | 0.6  | 0.6  | 0.59  | 0.31 | -0.42 | 0.44 | -1.5 | 4.54  | 2748.65 | 0.97 | 0.39 | 0.03 |
| 2598 | QLLKIDIGYGGIALPELICTMFF | 25 | 0.04  | 0.6  | 0.6  | 0.41  | 0.31 | -0.36 | 0.48 | -1.5 | 4.54  | 2736.59 | 0.99 | 0.39 | 0.03 |
| 2599 | LLKIDIGYGGIALPELICTMFFH | 25 | 0.04  | 0.6  | 0.6  | 0.41  | 0.31 | -0.36 | 0.48 | -1.5 | 4.54  | 2736.59 | 0.94 | 0.35 | 0.04 |
| 2600 | .KDIDGYGGIALPELICTMFHTS | 25 | 0.08  | 0.6  | 0.6  | 0.54  | 0.26 | -0.37 | 0.4  | -1.5 | 4.54  | 2665.51 | 0.93 | 0.33 | 0.03 |
| 2601 | KDIDGYGGIALPELICTMFHTSC | 25 | 0.05  | 0.61 | 0.61 | 0.33  | 0.26 | -0.39 | 0.44 | -1.5 | 4.54  | 2715.52 | 0.93 | 0.33 | 0.04 |
| 2602 | IDGYGGIALPELICTMFHTSG   | 25 | 0     | 0.62 | 0.62 | 0.04  | 0.26 | -0.2  | 0.48 | -2.5 | 4.22  | 2717.44 | 0.93 | 0.32 | 0.05 |
| 2603 | DYGGIALPELICTMFHTSGYI   | 25 | 0.04  | 0.61 | 0.61 | 0.17  | 0.11 | -0.33 | 0.44 | -3.5 | 3.84  | 2690.37 | 0.94 | 0.29 | 0.05 |
| 2604 | YGGIALPELICTMFHTSGYD    | 25 | 0.04  | 0.61 | 0.61 | 0.17  | 0.16 | -0.44 | 0.48 | -2.5 | 4.03  | 2703.42 | 0.93 | 0.28 | 0.04 |
| 2605 | YGGIALPELICTMFHTSGYDT   | 25 | 0.02  | 0.6  | 0.6  | 0.06  | 0.16 | -0.39 | 0.48 | -2.5 | 4.03  | 2661.33 | 0.94 | 0.27 | 0.04 |
| 2606 | YGGIALPELICTMFHTSGYDTQ  | 25 | 0.08  | 0.6  | 0.6  | 0.38  | 0.16 | -0.58 | 0.44 | -1.5 | 4.36  | 2659.41 | 0.83 | 0.27 | 0.07 |
| 2607 | GGIALPELICTMFHTSGYDTQA  | 25 | 0.1   | 0.6  | 0.6  | 0.56  | 0.16 | -0.64 | 0.44 | -1.5 | 4.36  | 2701.49 | 0.93 | 0.31 | 0.05 |
| 2608 | GIALPELICTMFHTSGYDTQAI  | 25 | 0.07  | 0.6  | 0.6  | 0.48  | 0.21 | -0.43 | 0.44 | -2.5 | 4.14  | 2667.43 | 0.83 | 0.33 | 0.17 |
| 2609 | IALPELICTMFHTSGYDTQAI   | 25 | 0.04  | 0.6  | 0.6  | 0.35  | 0.21 | -0.42 | 0.52 | -2.5 | 4.14  | 2724.48 | 0.95 | 0.33 | 0.05 |
| 2610 | .LPELICTMFHTSGYDTQAI    | 25 | 0.01  | 0.61 | 0.61 | 0.23  | 0.21 | -0.42 | 0.6  | -2.5 | 4.14  | 2781.53 | 0.93 | 0.33 | 0.03 |
| 2611 | .PELICTMFHTSGYDTQAI     | 25 | -0.05 | 0.61 | 0.61 | -0.09 | 0.26 | -0.22 | 0.64 | -3.5 | 4     | 2797.48 | 0.94 | 0.33 | 0.04 |
| 2612 | ELICTMFHTSGYDTQAI       | 25 | -0.07 | 0.61 | 0.61 | -0.2  | 0.26 | -0.19 | 0.68 | -3.5 | 4     | 2813.48 | 0.93 | 0.32 | 0.05 |
| 2613 | .LICTMFHTSGYDTQAI       | 25 | -0.1  | 0.61 | 0.61 | -0.38 | 0.26 | -0.14 | 0.72 | -3.5 | 4     | 2801.42 | 0.87 | 0.28 | 0.04 |
| 2614 | .ICTMFHTSGYDTQAI        | 25 | -0.12 | 0.62 | 0.62 | -0.45 | 0.31 | -0.02 | 0.76 | -4.5 | 3.91  | 2833.42 | 0.80 | 0.29 | 0.04 |
| 2615 | .CTMFHTSGYDTQAI         | 25 | -0.09 | 0.62 | 0.62 | -0.36 | 0.26 | -0.23 | 0.76 | -3.5 | 4     | 2867.48 | 0.98 | 0.33 | 0.03 |
| 2616 | TMFHTSGYDTQAI           | 25 | -0.11 | 0.63 | 0.63 | -0.53 | 0.26 | -0.16 | 0.76 | -3.5 | 4     | 2811.37 | 0.93 | 0.34 | 0.13 |
| 2617 | MFHTSGYDTQAI            | 25 | -0.11 | 0.62 | 0.62 | -0.56 | 0.26 | -0.16 | 0.76 | -3.5 | 4     | 2811.37 | 0.94 | 0.33 | 0.03 |
| 2618 | IFHTSGYDTQAI            | 25 | -0.09 | 0.62 | 0.62 | -0.55 | 0.26 | -0.22 | 0.76 | -3.5 | 4     | 2855.41 | 0.93 | 0.36 | 0.03 |
| 2619 | HTSGYDTQAI              | 25 | -0.11 | 0.63 | 0.63 | -0.66 | 0.31 | -0.19 | 0.8  | -3.5 | 4     | 2882.44 | 0.93 | 0.34 | 0.03 |
| 2620 | ITSGYDTQAI              | 25 | -0.09 | 0.63 | 0.63 | -0.56 | 0.31 | -0.21 | 0.8  | -3.5 | 4     | 2864.41 | 0.94 | 0.35 | 0.04 |
| 2621 | ISGYDTQAI               | 25 | -0.13 | 0.62 | 0.62 | -0.7  | 0.31 | -0.1  | 0.84 | -3.5 | 4     | 2804.31 | 0.93 | 0.33 | 0.08 |
| 2622 | ISGYDTQAI               | 25 | -0.14 | 0.65 | 0.65 | -0.71 | 0.25 | -0.07 | 0.88 | -4   | 3.51  | 2781.27 | 0.93 | 0.33 | 0.03 |

|      |                          |    |       |      |      |       |      |       |      |      |      |         |      |      |      |
|------|--------------------------|----|-------|------|------|-------|------|-------|------|------|------|---------|------|------|------|
| 2623 | 3YDTQAIVENNESTEYGLFQISI  | 25 | -0.17 | 0.66 | 0.66 | -0.84 | 0.4  | 0.06  | 0.92 | -3   | 4.01 | 2808.34 | 0.93 | 0.34 | 0.03 |
| 2624 | YDTQAIVENNESTEYGLFQISNI  | 25 | -0.14 | 0.66 | 0.66 | -0.66 | 0.4  | -0.02 | 0.88 | -3   | 4.01 | 2834.43 | 0.83 | 0.39 | 0.09 |
| 2625 | YDTQAIVENNESTEYGLFQISNKL | 25 | -0.13 | 0.65 | 0.65 | -0.68 | 0.4  | -0.16 | 0.92 | -3   | 4.01 | 2963.59 | 0.93 | 0.38 | 0.04 |
| 2626 | QAIVENNESTEYGLFQISNKL    | 25 | -0.13 | 0.64 | 0.64 | -0.52 | 0.4  | -0.1  | 0.88 | -3   | 4.01 | 2903.55 | 0.94 | 0.38 | 0.09 |
| 2627 | AIVENNESTEYGLFQISNKLW    | 25 | -0.15 | 0.64 | 0.64 | -0.54 | 0.55 | -0.1  | 0.92 | -1   | 4.79 | 2916.64 | 0.93 | 0.38 | 0.23 |
| 2628 | AIVENNESTEYGLFQISNKLWCI  | 25 | -0.15 | 0.64 | 0.64 | -0.54 | 0.55 | -0.08 | 0.92 | -1   | 4.79 | 2902.61 | 0.98 | 0.40 | 0.04 |
| 2629 | VENNESTEYGLFQISNKLWCK    | 25 | -0.14 | 0.64 | 0.64 | -0.44 | 0.5  | -0.07 | 0.88 | -1   | 4.79 | 2861.55 | 0.80 | 0.45 | 0.04 |
| 2630 | ENNESTEYGLFQISNKLWCKSS   | 25 | -0.17 | 0.64 | 0.64 | -0.65 | 0.55 | -0.04 | 0.96 | -1   | 4.79 | 2918.61 | 0.87 | 0.43 | 0.04 |
| 2631 | NNESTEYGLFQISNKLWCKSS    | 25 | -0.18 | 0.64 | 0.64 | -0.66 | 0.55 | -0.03 | 0.96 | -1   | 4.79 | 2904.58 | 0.93 | 0.41 | 0.04 |
| 2632 | NESTEYGLFQISNKLWCKSSQ    | 25 | -0.2  | 0.63 | 0.63 | -0.89 | 0.55 | 0.03  | 0.96 | -1   | 4.79 | 2902.56 | 0.61 | 0.41 | 0.05 |
| 2633 | ESTEYGLFQISNKLWCKSSQV    | 25 | -0.21 | 0.63 | 0.63 | -0.89 | 0.55 | -0.08 | 1    | 0    | 6.45 | 2901.58 | 0.94 | 0.37 | 0.03 |
| 2634 | STEYGLFQISNKLWCKSSQVP    | 25 | -0.19 | 0.62 | 0.62 | -0.78 | 0.55 | -0.08 | 0.96 | 0    | 6.45 | 2874.55 | 0.99 | 0.38 | 0.03 |
| 2635 | TEYGLFQISNKLWCKSSQVQP    | 25 | -0.24 | 0.62 | 0.62 | -0.82 | 0.64 | 0.03  | 1.04 | 1    | 8.51 | 2916.63 | 0.61 | 0.41 | 0.03 |
| 2636 | EYGLFQISNKLWCKSSQVPPQ    | 25 | -0.24 | 0.62 | 0.62 | -0.82 | 0.59 | -0.08 | 1.08 | 2    | 9.25 | 2901.62 | 0.97 | 0.41 | 0.03 |
| 2637 | YGLFQISNKLWCKSSQVQPSF    | 25 | -0.2  | 0.63 | 0.63 | -0.61 | 0.59 | -0.16 | 1.04 | 2    | 9.25 | 2927.71 | 0.97 | 0.37 | 0.04 |
| 2638 | GLFQISNKLWCKSSQVQPSRN    | 25 | -0.19 | 0.63 | 0.63 | -0.48 | 0.59 | -0.19 | 1    | 2    | 8.94 | 2929.74 | 0.61 | 0.38 | 0.35 |
| 2639 | ILFQISNKLWCKSSQVQPSRNI   | 25 | -0.19 | 0.63 | 0.63 | -0.48 | 0.54 | -0.19 | 1    | 2    | 8.94 | 2915.71 | 0.99 | 0.40 | 0.17 |
| 2640 | FLQISNKLWCKSSQVQPSRNIC   | 25 | -0.17 | 0.63 | 0.63 | -0.25 | 0.54 | -0.17 | 0.96 | 2    | 8.98 | 2865.7  | 0.98 | 0.41 | 0.35 |
| 2641 | QISNKLWCKSSQVQPSRNICD    | 25 | -0.18 | 0.63 | 0.63 | -0.27 | 0.54 | -0.16 | 1    | 2    | 8.98 | 2895.72 | 0.94 | 0.40 | 0.11 |
| 2642 | ISNKLWCKSSQVQPSRNICDI    | 25 | -0.2  | 0.63 | 0.63 | -0.32 | 0.54 | -0.12 | 1    | 2    | 8.77 | 2885.69 | 0.61 | 0.39 | 0.50 |
| 2643 | SNKLWCKSSQVQPSRNICDIS    | 25 | -0.25 | 0.63 | 0.63 | -0.57 | 0.54 | 0.1   | 1.04 | 1    | 8.24 | 2853.6  | 0.99 | 0.41 | 0.11 |
| 2644 | NKLWCKSSQVQPSRNICDISC    | 25 | -0.27 | 0.63 | 0.63 | -0.59 | 0.64 | 0.21  | 1.04 | 2    | 8.75 | 2853.64 | 0.97 | 0.39 | 0.24 |
| 2645 | KLWCKSSQVQPSRNICDISCD    | 25 | -0.28 | 0.63 | 0.63 | -0.66 | 0.64 | 0.18  | 1.04 | 2    | 8.75 | 2887.65 | 0.99 | 0.38 | 0.37 |
| 2646 | LWCKSSQVQPSRNICDISCDK    | 25 | -0.24 | 0.63 | 0.63 | -0.47 | 0.64 | 0.1   | 1    | 2    | 8.75 | 2913.74 | 0.99 | 0.39 | 0.83 |
| 2647 | WCKSSQVQPSRNICDISCDKF    | 25 | -0.25 | 0.63 | 0.63 | -0.47 | 0.64 | 0.21  | 0.96 | 1    | 8.23 | 2914.72 | 0.97 | 0.27 | 0.71 |
| 2648 | CKSSQVQPSRNICDISCDKFL    | 25 | -0.23 | 0.64 | 0.64 | -0.46 | 0.49 | 0.21  | 0.92 | -1   | 4.58 | 2901.63 | 0.97 | 0.25 | 0.18 |
| 2649 | KSSQVQPSRNICDISCDKFLD    | 25 | -0.28 | 0.65 | 0.65 | -0.75 | 0.49 | 0.4   | 0.96 | -2   | 4.29 | 2903.55 | 0.97 | 0.25 | 0.10 |
| 2650 | SSQVQPSRNICDISCDKFLDD    | 25 | -0.27 | 0.65 | 0.65 | -0.53 | 0.49 | 0.46  | 0.92 | -2   | 4.29 | 2830.5  | 0.86 | 0.27 | 0.08 |
| 2651 | SSQVQPSRNICDISCDKFLDDD   | 25 | -0.28 | 0.65 | 0.65 | -0.66 | 0.49 | 0.49  | 0.96 | -2   | 4.29 | 2828.47 | 0.99 | 0.26 | 0.08 |
| 2652 | SSQVQPSRNICDISCDKFLDDDI  | 25 | -0.26 | 0.65 | 0.65 | -0.64 | 0.34 | 0.49  | 0.92 | -4   | 3.86 | 2815.38 | 0.99 | 0.24 | 0.08 |
| 2653 | VPQSRNICDISCDKFLDDIT     | 25 | -0.28 | 0.66 | 0.66 | -0.75 | 0.34 | 0.6   | 0.92 | -5   | 3.77 | 2843.39 | 0.99 | 0.25 | 0.06 |
| 2654 | VPQSRNICDISCDKFLDDITDI   | 25 | -0.24 | 0.67 | 0.67 | -0.54 | 0.34 | 0.51  | 0.88 | -5   | 3.77 | 2869.48 | 0.99 | 0.25 | 0.07 |
| 2655 | QSRNICDISCDKFLDDITDDI    | 25 | -0.2  | 0.67 | 0.67 | -0.32 | 0.29 | 0.45  | 0.8  | -5   | 3.77 | 2872.54 | 0.98 | 0.26 | 0.10 |
| 2656 | QSRNICDISCDKFLDDITDDIV   | 25 | -0.22 | 0.67 | 0.67 | -0.39 | 0.29 | 0.47  | 0.8  | -5   | 3.77 | 2876.54 | 0.87 | 0.27 | 0.14 |
| 2657 | SRNICDISCDKFLDDITDDIMC   | 25 | -0.21 | 0.68 | 0.68 | -0.26 | 0.29 | 0.45  | 0.8  | -5   | 3.77 | 2850.5  | 0.98 | 0.31 | 0.13 |
| 2658 | RNICDISCDKFLDDITDDIMCA   | 25 | -0.23 | 0.68 | 0.68 | -0.27 | 0.39 | 0.56  | 0.8  | -4   | 4    | 2850.54 | 0.99 | 0.29 | 0.07 |
| 2659 | NICDISCDKFLDDITDDIMCAK   | 25 | -0.26 | 0.68 | 0.68 | -0.4  | 0.54 | 0.67  | 0.84 | -3   | 4.22 | 2891.64 | 0.98 | 0.31 | 0.36 |
| 2660 | ICDISCDKFLDDITDDIMCAK    | 25 | -0.16 | 0.68 | 0.68 | -0.04 | 0.44 | 0.48  | 0.68 | -4   | 4    | 2848.62 | 0.98 | 0.31 | 0.17 |
| 2661 | CDISCDKFLDDITDDIMCAKIL   | 25 | -0.11 | 0.67 | 0.67 | 0.26  | 0.44 | 0.4   | 0.6  | -4   | 4    | 2847.68 | 0.98 | 0.36 | 0.40 |
| 2662 | DISCDKFLDDITDDIMCAKIL    | 25 | -0.17 | 0.68 | 0.68 | -0.06 | 0.44 | 0.59  | 0.64 | -5   | 3.9  | 2849.6  | 0.80 | 0.36 | 0.04 |
| 2663 | ISCDKFLDDITDDIMCAKILC    | 25 | -0.14 | 0.68 | 0.68 | 0.02  | 0.44 | 0.56  | 0.64 | -5   | 3.9  | 2859.63 | 0.94 | 0.36 | 0.04 |
| 2664 | SCDKFLDDITDDIMCAKILDI    | 25 | -0.16 | 0.68 | 0.68 | 0     | 0.59 | 0.56  | 0.68 | -3   | 4.22 | 2872.72 | 0.98 | 0.33 | 0.30 |
| 2665 | CDKFLDDITDDIMCAKILDIK    | 25 | -0.18 | 0.68 | 0.68 | -0.2  | 0.59 | 0.63  | 0.68 | -3   | 4.22 | 2816.61 | 0.98 | 0.33 | 0.32 |
| 2666 | DKFLDDITDDIMCAKILDIKC    | 25 | -0.14 | 0.68 | 0.68 | 0.02  | 0.59 | 0.55  | 0.64 | -3   | 4.22 | 2842.7  | 0.80 | 0.33 | 0.05 |
| 2667 | KFLDDITDDIMCAKILDIKGI    | 25 | -0.17 | 0.69 | 0.69 | -0.22 | 0.59 | 0.71  | 0.68 | -4   | 4.1  | 2854.65 | 0.80 | 0.32 | 0.04 |
| 2668 | FLDDITDDIMCAKILDIKIGID   | 25 | -0.14 | 0.69 | 0.69 | -0.14 | 0.59 | 0.5   | 0.68 | -3   | 4.22 | 2902.74 | 0.98 | 0.36 | 0.06 |
| 2669 | LDDITDDIMCAKILDIKIGIDY   | 25 | -0.08 | 0.68 | 0.68 | -0.02 | 0.44 | 0.24  | 0.64 | -4   | 4    | 2960.78 | 0.80 | 0.46 | 0.04 |
| 2670 | DDITDDIMCAKILDIKIGIDYW   | 25 | -0.09 | 0.67 | 0.67 | 0.02  | 0.44 | 0.27  | 0.64 | -4   | 4    | 2926.77 | 0.98 | 0.42 | 0.03 |
| 2671 | IDITDDIMCAKILDIKIGIDYWL  | 25 | -0.1  | 0.67 | 0.67 | -0.06 | 0.44 | 0.32  | 0.64 | -4   | 4    | 2884.68 | 0.80 | 0.47 | 0.03 |
| 2672 | IDITDDIMCAKILDIKIGIDYLA  | 25 | -0.09 | 0.64 | 0.64 | -0.04 | 0.5  | 0.18  | 0.64 | -2.5 | 4.39 | 2906.74 | 0.94 | 0.47 | 0.03 |
| 2673 | ITDDIMCAKILDIKIGIDYWL    | 25 | -0.1  | 0.64 | 0.64 | -0.06 | 0.65 | 0.18  | 0.68 | -0.5 | 5.42 | 2919.83 | 0.94 | 0.46 | 0.05 |
| 2674 | DDIMCAKILDIKIGIDYWL      | 25 | -0.06 | 0.63 | 0.63 | 0.15  | 0.65 | 0.04  | 0.64 | 0.5  | 7.05 | 2875.82 | 0.97 | 0.54 | 0.27 |
| 2675 | DDIMCAKILDIKIGIDYWL      | 25 | -0.07 | 0.62 | 0.62 | 0.12  | 0.65 | 0.04  | 0.64 | 0.5  | 7.05 | 2875.82 | 0.93 | 0.54 | 0.24 |
| 2676 | DDIMCAKILDIKIGIDYWL      | 25 | -0.06 | 0.62 | 0.62 | 0.25  | 0.65 | 0.02  | 0.6  | 0.5  | 7.03 | 2877.85 | 0.94 | 0.50 | 0.74 |
| 2677 | DDIMCAKILDIKIGIDYWL      | 25 | -0.04 | 0.62 | 0.62 | 0.36  | 0.65 | -0.12 | 0.6  | 1.5  | 8.32 | 2863.87 | 0.94 | 0.51 | 0.76 |
| 2678 | DDIMCAKILDIKIGIDYWL      | 25 | -0.04 | 0.61 | 0.61 | 0.36  | 0.7  | -0.12 | 0.6  | 1.5  | 8.32 | 2877.9  | 0.93 | 0.51 | 0.92 |
| 2679 | DDIMCAKILDIKIGIDYWL      | 25 | -0.11 | 0.61 | 0.61 | 0.03  | 0.84 | 0.07  | 0.68 | 2.5  | 8.84 | 2892.91 | 0.93 | 0.52 | 0.91 |
| 2680 | DDIMCAKILDIKIGIDYWL      | 25 | -0.1  | 0.6  | 0.6  | 0.1   | 0.84 | 0.05  | 0.68 | 2.5  | 8.84 | 2874.88 | 0.69 | 0.51 | 0.96 |
| 2681 | DDIMCAKILDIKIGIDYWL      | 25 | -0.12 | 0.6  | 0.6  | -0.14 | 0.89 | 0.21  | 0.72 | 1.5  | 8.44 | 2900.86 | 0.94 | 0.55 | 0.51 |
| 2682 | DDIMCAKILDIKIGIDYWL      | 25 | -0.16 | 0.61 | 0.61 | -0.35 | 0.94 | 0.24  | 0.8  | 1.5  | 8.44 | 2957.92 | 0.98 | 0.44 | 0.08 |
| 2683 | DDIMCAKILDIKIGIDYWL      | 25 | -0.1  | 0.6  | 0.6  | -0.23 | 0.8  | -0.02 | 0.76 | 0.5  | 7.06 | 3015.96 | 0.98 | 0.44 | 0.08 |
| 2684 | DDIMCAKILDIKIGIDYWL      | 25 | -0.04 | 0.6  | 0.6  | 0.08  | 0.65 | -0.21 | 0.68 | -0.5 | 5.5  | 3000.95 | 0.93 | 0.45 | 0.14 |
| 2685 | DDIMCAKILDIKIGIDYWL      | 25 | -0.07 | 0.59 | 0.59 | 0     | 0.65 | -0.18 | 0.68 | -0.5 | 5.5  | 2990.92 | 0.93 | 0.41 | 0.24 |
| 2686 | DDIMCAKILDIKIGIDYWL      | 25 | -0.11 | 0.6  | 0.6  | -0.29 | 0.7  | 0.02  | 0.72 | -1.5 | 4.9  | 3006.87 | 0.94 | 0.43 | 0.03 |

|      |                       |    |       |      |      |       |      |      |      |     |      |         |      |      |      |
|------|-----------------------|----|-------|------|------|-------|------|------|------|-----|------|---------|------|------|------|
| 2687 | 3IDYWLAKALCTEKLEQWLCI | 25 | -0.13 | 0.6  | 0.6  | -0.31 | 0.85 | 0.02 | 0.76 | 0.5 | 7.04 | 3019.96 | 0.93 | 0.44 | 0.11 |
| 2688 | 3IDYWLAKALCTEKLEQWLCE | 25 | -0.13 | 0.59 | 0.59 | -0.34 | 0.85 | 0.02 | 0.76 | 0.5 | 7.04 | 3019.96 | 0.93 | 0.50 | 0.43 |

---





|     |         |        |       |         |       |       |       |       |       |       |       |       |       |       |       |       |       |       |       |       |       |          |          |          |          |          |          |          |          |          |          |          |          |          |          |          |          |          |          |          |          |          |
|-----|---------|--------|-------|---------|-------|-------|-------|-------|-------|-------|-------|-------|-------|-------|-------|-------|-------|-------|-------|-------|-------|----------|----------|----------|----------|----------|----------|----------|----------|----------|----------|----------|----------|----------|----------|----------|----------|----------|----------|----------|----------|----------|
| 238 | 014764  | MVP    | HUMAN | MVP     | 8.54  | 9.99  | 8.71  | 9.53  | 9.53  | 10.51 | 10.66 | 9.74  | 10.86 | 9.81  | 7.95  | 9.47  | 8.74  | 8.05  | 9.09  | 9.59  | 8.22  | 9.63     | 4.41E+02 | 2.94E+03 | 7.63E+02 | NA       | NA       | 4.30E+02 | 4.88E+02 | 2.65E+02 | 3.58E+02 | 1.70E+03 | 2.70E+02 | 3.01E+02 | 7.05E+02 | 4.36E+02 | 6.72E+02 | 5.85E+02 | 5.16E+02 | 2.10E+03 |          |          |
| 239 | 018V1   | NAV2   | HUMAN | NAV2    | 11.21 | 10.33 | 11.44 | 11.79 | 11.44 | 11.44 | 10.63 | 11.43 | 11.44 | 12.62 | 13.51 | 11.94 | 10.77 | 12.23 | 11.78 | 12.45 | 11.64 | 9.53     | 2.06E+03 | 3.82E+03 | 1.18E+04 | 1.00E+03 | NA       | NA       | 4.75E+02 | 7.58E+02 | 3.92E+03 | 1.42E+04 | 8.19E+03 | 6.48E+03 | 4.56E+03 | 7.80E+03 | 3.92E+03 | 6.58E+03 | 4.36E+03 | 1.93E+04 |          |          |
| 240 | 018V3   | RTM4   | HUMAN | RTM4    | 10.96 | 12.43 | 14.05 | 11.07 | 11.95 | 10.91 | 11.20 | 9.41  | 11.05 | 14.63 | 9.77  | 10.51 | 11.84 | 11.33 | 11.04 | 10.57 | 11.84 | 11.91    | 3.80E+03 | 1.74E+04 | 7.48E+04 | 3.63E+04 | NA       | NA       | 5.51E+02 | 6.01E+02 | 2.18E+02 | 5.89E+04 | 7.05E+02 | 1.74E+03 | 1.02E+04 | 4.18E+04 | 1.59E+04 | 1.06E+04 | 2.34E+03 | 1.22E+04 |          |          |
| 241 | P62917  | R18    | HUMAN | R18     | 12.11 | 13.36 | 13.72 | 10.95 | 11.68 | 9.90  | 11.68 | 11.51 | 11.68 | 11.71 | 11.68 | 11.34 | 10.90 | 11.67 | 11.61 | 12.23 | 11.44 | 15.45    | 4.16E+03 | 3.37E+04 | 5.92E+04 | 5.87E+02 | NA       | NA       | 2.96E+02 | NA       | 8.02E+02 | NA       | 7.41E+03 | 2.38E+03 | 6.48E+03 | 5.08E+03 | 6.55E+03 | 2.59E+04 | 3.15E+03 | 3.80E+03 | 1.47E+05 |          |
| 242 | P53208  | R122   | HUMAN | R122    | 11.09 | 9.81  | 12.08 | 12.52 | 10.58 | 11.25 | 12.49 | 11.98 | 11.25 | 12.45 | 9.46  | 10.62 | 10.08 | 11.67 | 9.72  | 11.68 | 13.48 | 10.60    | 1.98E+03 | 2.54E+03 | 3.25E+04 | 1.67E+03 | NA       | NA       | 3.48E+02 | 6.91E+02 | 1.64E+03 | 1.09E+03 | NA       | 1.26E+04 | 5.87E+02 | 1.96E+03 | 2.61E+03 | 1.52E+03 | 3.39E+03 | 2.18E+03 | 1.52E+04 | 4.59E+03 |
| 243 | 018V4   | R18C4  | HUMAN | R18C4   | 11.88 | 11.25 | 13.58 | 13.20 | 12.99 | 9.50  | 11.12 | 11.83 | 12.99 | 15.41 | 11.20 | 13.46 | 10.81 | 13.09 | 15.48 | 11.31 | 12.88 | 14.19    | 3.84E+03 | 7.52E+03 | 5.35E+04 | 2.82E+03 | NA       | NA       | 2.46E+02 | 6.54E+02 | 9.85E+02 | NA       | 1.01E+04 | 6.64E+03 | 2.06E+04 | 4.71E+03 | 1.42E+04 | 6.42E+03 | 3.71E+03 | 1.01E+04 | 6.11E+04 |          |
| 244 | P49721  | PSB2   | HUMAN | PSMB2   | 12.15 | 11.86 | 9.04  | 10.54 | 9.95  | 11.48 | 11.00 | 10.54 | 10.70 | 11.28 | 10.42 | 10.05 | 10.21 | 9.57  | 11.63 | 9.67  | 12.03 | 9.36     | 4.00E+03 | 1.17E+04 | 3.12E+03 | NA       | NA       | 2.34E+02 | 8.00E+02 | 6.03E+02 | 4.30E+02 | NA       | 5.42E+03 | 1.05E+04 | 9.80E+02 | 2.94E+03 | 1.32E+03 | 2.63E+04 | 1.64E+02 | 5.66E+03 | 1.66E+04 |          |
| 245 | 018V373 | HD7    | HUMAN | HD7     | 10.42 | 8.96  | 9.01  | 10.47 | 10.63 | 10.95 | 10.47 | 10.43 | 10.92 | 10.38 | 9.62  | 9.99  | 9.46  | 10.23 | 12.29 | 9.61  | 10.90 | 11.62    | 1.29E+03 | 1.25E+03 | 1.19E+03 | 4.30E+02 | NA       | NA       | 3.59E+02 | 5.68E+02 | 4.31E+02 | 4.00E+02 | 3.70E+02 | 2.71E+03 | 6.46E+02 | 1.52E+03 | 1.95E+03 | 4.42E+04 | 5.93E+02 | 2.66E+03 | 9.89E+03 |          |
| 246 | P49831  | HO71   | HUMAN | HO71    | 9.47  | 10.51 | 11.11 | 10.47 | 10.80 | 11.78 | 9.54  | 10.33 | 10.24 | 11.70 | 8.57  | 10.14 | 8.53  | 10.24 | 12.06 | 9.37  | 8.67  | 13.98    | 7.80E+02 | 4.37E+03 | 8.79E+03 | 4.30E+02 | NA       | NA       | 4.00E+02 | 9.75E+02 | 2.44E+02 | 3.33E+02 | NA       | 7.38E+03 | 3.62E+02 | 1.11E+03 | 5.34E+02 | 1.97E+03 | 3.70E+04 | 5.77E+02 | 6.59E+02 | 1.29E+04 |
| 247 | Q71119  | HO4V   | HUMAN | HO4Z    | 10.42 | 8.71  | 9.26  | 9.60  | 10.60 | 10.40 | 10.17 | 11.11 | 10.22 | 8.86  | 9.47  | 9.75  | 10.37 | 9.10  | 9.42  | 9.54  | 9.36  | 8.87     | 5.68E+02 | 9.87E+02 | 1.06E+03 | 4.30E+02 | NA       | NA       | 4.00E+02 | 4.00E+02 | 3.57E+02 | 6.18E+02 | 6.94E+02 | 5.91E+02 | 8.90E+02 | 3.32E+03 | 2.02E+03 | 5.68E+02 | 9.94E+02 | 1.03E+03 |          |          |
| 248 | 018V29  | ROAA   | HUMAN | HWRNPA8 | 9.88  | 9.07  | 9.29  | 11.49 | 11.03 | 11.08 | 11.49 | 12.28 | 11.46 | 8.79  | 11.23 | 9.66  | 9.66  | 9.85  | 9.53  | 9.42  | 10.60 | 8.53     | 9.27E+02 | 1.38E+03 | 1.70E+03 | 8.33E+02 | NA       | NA       | 4.66E+02 | 6.15E+02 | 8.33E+02 | 1.34E+03 | 5.28E+02 | 6.44E+02 | 1.77E+03 | 4.96E+02 | 1.02E+03 | 1.51E+03 | 2.56E+03 | 5.31E+02 | 4.17E+03 | 7.07E+02 |
| 249 | 018V18  | RTF4   | HUMAN | RTF4    | 11.29 | 9.52  | 9.77  | 12.17 | 11.94 | 10.10 | 10.38 | 12.38 | 10.22 | 9.54  | 10.87 | 10.47 | 9.84  | 10.48 | 9.42  | 11.29 | 10.72 | 10.40    | 2.24E+03 | 2.02E+03 | 2.81E+03 | 1.31E+03 | NA       | NA       | 4.69E+02 | 3.33E+02 | 4.06E+02 | 1.25E+03 | 2.38E+02 | 1.34E+03 | 1.40E+03 | 1.67E+03 | 2.14E+03 | 2.34E+03 | 2.04E+03 | 1.68E+03 | 2.35E+03 | 9.93E+03 |
| 250 | P18084  | IFB5   | HUMAN | IFB5    | 11.82 | 8.78  | 10.55 | 10.47 | 11.01 | 11.15 | 11.10 | 11.48 | 11.18 | 11.87 | 10.75 | 10.60 | 11.03 | 9.76  | 11.32 | 10.97 | 10.62 | 10.86    | 2.02E+03 | 1.06E+03 | 5.59E+03 | 4.30E+02 | NA       | NA       | 3.30E+02 | 6.48E+02 | 6.45E+02 | 6.45E+02 | 6.45E+02 | 3.62E+03 | 1.14E+03 | 4.39E+02 | 5.69E+03 | 2.60E+04 | 2.04E+04 | 3.17E+03 | 2.20E+03 | 5.61E+03 |
| 251 | 018V12  | GCC2   | HUMAN | GCC2    | 12.38 | 10.80 | 12.21 | 10.10 | 11.91 | 10.56 | 11.64 | 11.51 | 12.15 | 12.15 | 11.32 | 12.06 | 12.02 | 10.69 | 11.78 | 12.15 | 12.22 | 10.81    | 4.67E+03 | 5.43E+03 | 2.01E+04 | 3.41E+02 | NA       | NA       | 8.31E+02 | 4.41E+02 | 9.22E+02 | 8.02E+02 | 8.42E+02 | 1.02E+04 | 1.87E+03 | 7.18E+03 | 1.17E+04 | 2.69E+03 | 2.97E+04 | 2.99E+03 | 6.42E+03 | 5.42E+03 |
| 252 | 018V12  | SMB60  | HUMAN | SMB60   | 10.74 | 11.21 | 10.52 | 10.95 | 11.02 | 10.16 | 9.56  | 11.18 | 11.02 | 11.21 | 11.23 | 10.85 | 12.30 | 9.67  | 12.88 | 11.53 | 10.94 | 12.07    | 1.58E+03 | 7.32E+03 | 5.45E+03 | 5.87E+02 | NA       | NA       | 4.63E+02 | 3.45E+02 | 2.47E+02 | 6.45E+02 | NA       | 5.12E+03 | 3.21E+03 | 2.48E+03 | 1.43E+04 | 1.33E+04 | 4.92E+04 | 1.98E+03 | 1.72E+03 | 1.36E+04 |
| 253 | 018V45  | DOM47  | HUMAN | DOM47   | 9.52  | 9.94  | 9.18  | 10.35 | 11.01 | 10.73 | 10.23 | 9.41  | 10.00 | 11.03 | 9.93  | 9.93  | 11.24 | 12.00 | 9.58  | 9.36  | 10.12 | 9.26     | 7.52E+02 | 2.82E+02 | 1.49E+03 | 4.00E+02 | NA       | NA       | 3.77E+02 | 3.61E+02 | 2.26E+02 | 3.08E+02 | 4.10E+02 | 1.88E+03 | 1.75E+02 | 1.45E+04 | 1.15E+04 | 1.67E+04 | 8.04E+02 | 5.27E+02 | 1.48E+03 |          |
| 254 | 018V59  | Sep-08 | HUMAN | SEPTM8  | 8.26  | 8.09  | 9.69  | 9.69  | 9.69  | 9.69  | 9.69  | 9.69  | 10.54 | 9.94  | 10.08 | 9.92  | 8.34  | 10.07 | 9.62  | 9.69  | 9.69  | 8.45     | 3.51E+02 | 9.95E+02 | 6.45E+02 | NA       | NA       | NA       | NA       | NA       | NA       | 2.92E+02 | 1.90E+03 | 8.51E+02 | 8.01E+02 | 3.98E+02 | 1.07E+03 | 3.07E+03 | 1.21E+03 | 1.03E+03 | 1.08E+03 | 6.45E+03 |
| 255 | 010713  | MPPA   | HUMAN | MPPA    | 8.06  | 8.71  | 8.61  | 9.36  | 10.80 | 10.21 | 10.47 | 9.59  | 9.86  | 8.68  | 9.36  | 9.73  | 8.63  | 9.22  | 9.36  | 11.73 | 9.50  | 8.45     | 3.51E+02 | 9.95E+02 | 6.45E+02 | NA       | NA       | NA       | NA       | NA       | NA       | 2.42E+02 | 1.91E+02 | 5.65E+02 | 5.55E+02 | 5.65E+02 | 6.15E+02 | 9.77E+02 | 1.30E+03 | 2.26E+03 | 1.08E+03 | 6.45E+03 |
| 256 | P19180  | TGM2   | HUMAN | TGM2    | 12.06 | 9.20  | 9.17  | 10.12 | 10.02 | 9.46  | 10.35 | 10.02 | 11.03 | 9.07  | 9.73  | 9.91  | 9.22  | 12.50 | 12.69 | 9.48  | 10.96 | 12.66    | 4.28E+02 | 1.55E+03 | 1.46E+03 | 3.47E+02 | NA       | NA       | 2.44E+02 | 2.28E+02 | 4.00E+02 | NA       | 4.00E+02 | 8.58E+02 | 6.86E+02 | 1.28E+03 | 9.41E+03 | 6.01E+04 | 5.50E+02 | 2.76E+03 | 2.08E+04 |          |
| 257 | 018V29  | CO06   | HUMAN | CO06    | 11.68 | 12.26 | 13.10 | 10.49 | 10.89 | 10.68 | 10.46 | 11.73 | 11.73 | 11.78 | 10.87 | 17.82 | 11.95 | 12.26 | 11.57 | 11.57 | 13.93 | 12.32    | 2.93E+03 | 1.55E+04 | 3.81E+04 | 4.37E+02 | NA       | NA       | 4.23E+02 | 4.77E+02 | 4.27E+02 | NA       | NA       | 7.81E+03 | 1.40E+03 | 4.46E+03 | 1.11E+04 | 8.01E+03 | 2.51E+04 | 2.03E+03 | 2.08E+04 | 1.64E+04 |
| 258 | 018V11  | ARP8   | HUMAN | ACTR8   | 9.04  | 12.03 | 8.99  | 11.54 | 10.30 | 10.53 | 10.81 | 11.43 | 9.83  | 9.73  | 10.49 | 12.64 | 12.65 | 10.01 | 9.29  | 9.51  | 9.34  | 5.73E+02 | 1.34E+04 | 1.07E+03 | 8.63E+02 | 2.91E+02 | 2.27E+03 | 4.48E+02 | 5.09E+02 | 5.14E+02 | 1.73E+03 | 6.87E+02 | 1.70E+03 | 3.82E+04 | 1.58E+04 | 3.99E+03 | 4.93E+02 | 4.93E+02 | 1.08E+03 | 1.63E+03 | 2.08E+03 | 1.63E+03 |
| 259 | 018V60  | PSM01  | HUMAN | PSM01   | 10.62 | 8.78  | 8.88  | 10.21 | 10.08 | 10.43 | 9.82  | 9.75  | 10.48 | 11.26 | 11.02 | 9.84  | 9.99  | 12.67 | 9.26  | 8.89  | 12.47 | 8.59     | 1.47E+03 | 1.06E+03 | 1.15E+03 | 3.66E+02 | NA       | NA       | 2.54E+02 | 4.07E+02 | 2.87E+02 | 2.63E+02 | 2.99E+02 | 5.33E+03 | 1.58E+03 | 6.95E+02 | 2.43E+03 | 1.06E+04 | 1.33E+03 | 3.98E+02 | 8.77E+03 | 7.95E+02 |
| 260 | 018V09  | K208   | HUMAN | KFZ08   | 9.75  | 9.53  | 10.18 | 11.31 | 10.08 | 9.87  | 10.20 | 11.01 | 10.18 | 10.44 | 10.60 | 10.67 | 9.92  | 8.61  | 9.88  | 10.26 | 11.20 | 10.60    | 8.59E+02 | 2.03E+03 | 8.97E+03 | 7.43E+02 | NA       | NA       | 2.53E+02 | 2.90E+02 | 3.62E+02 | 5.77E+02 | NA       | 2.85E+03 | 1.17E+03 | 2.07E+03 | 2.30E+03 | 1.85E+03 | 4.55E+03 | 8.77E+02 | 3.28E+03 | 2.85E+03 |
| 261 | 018V15  | CC185  | HUMAN | CC185   | 12.08 | 11.17 | 11.13 | 12.07 | 13.60 | 11.70 | 11.49 | 12.41 | 11.95 | 11.12 | 11.96 | 11.65 | 9.33  | 12.05 | 11.09 | 11.92 | 12.92 | 12.60    | 3.84E+03 | 7.08E+03 | 4.03E+03 | 1.23E+03 | NA       | NA       | 1.75E+03 | 9.24E+02 | 5.27E+02 | 1.46E+03 | NA       | 9.98E+03 | 2.84E+03 | 5.14E+03 | 1.34E+03 | 6.92E+03 | 1.67E+04 | 2.56E+03 | 1.04E+04 | 1.99E+04 |
| 262 | 018V64  | LY6F   | HUMAN | LY66F   | 12.22 | 11.40 | 11.36 | 11.12 | 11.36 | 11.10 | 10.90 | 10.77 | 11.36 | 11.97 | 11.76 | 11.35 | 11.36 | 10.73 | 10.76 | 11.51 | 11.37 | 12.24    | 4.20E+03 | 8.37E+03 | 1.07E+04 | 6.94E+02 | NA       | NA       | 6.25E+02 | 5.88E+02 | 4.96E+02 | NA       | 8.35E+03 | 2.51E+03 | 8.97E+03 | 7.17E+03 | 7.84E+03 | 1.23E+04 | 3.96E+03 | 3.62E+03 | 1.54E+04 |          |
| 263 | 018V18  | GXL71  | HUMAN | GXL71   | 10.98 | 14.48 | 11.82 | 10.78 | 11.63 | 11.63 | 11.03 | 10.53 | 12.88 | 11.08 | 11.26 | 13.93 | 11.10 | 11.83 | 11.44 | 14.14 | 13.43 | 13.43    | 1.84E+03 | 7.37E+04 | 1.50E+04 | 4.30E+02 | NA       | NA       | 3.59E+02 | NA       | 5.87E+02 | 2.88E+02 | NA       | 1.71E+04 | 1.60E+03 | 5.67E+03 | 4.52E+03 | 1.24E+04 | 3.09E+04 | 1.86E+03 | 2.10E+04 | 3.59E+04 |
| 264 | 018V60  | OSF6   | HUMAN | OSF6    | 10.55 | 8.34  | 10.24 | 10.47 | 10.73 | 10.28 | 11.62 | 11.51 | 10.56 | 8.13  | 10.20 | 9.47  | 9.51  | 7.03  | 10.55 | 8.09  | 9.47  | 10.33    | 1.46E+03 | 1.68E+02 | 4.32E+03 | 4.30E+02 | NA       | NA       | 3.82E+02 | 3.70E+02 | 3.46E+02 | 8.00E+02 | 2.95E+02 | 2.61E+02 | NA       | 3.00E+02 | 1.59E+02 | 1.24E+02 | 9.98E+02 | 2.68E+02 | 1.05E+03 | 3.79E+02 |
| 265 | 015102  | PA183  | HUMAN | PA183   | 10.74 | 12.45 | 10.98 | 10.95 | 10.95 | 10.48 | 9.    |       |       |       |       |       |       |       |       |       |       |          |          |          |          |          |          |          |          |          |          |          |          |          |          |          |          |          |          |          |          |          |



Table S3. Reactome pathway enrichment analysis of the significantly differentially expressed proteins of ALA-A2 treated A549 cells.

| Pathway identifier   | Pathway name                                                       | #Entities found | #Entities total | Entities ratio | Entities pValue    | Entities FDR    | #Reactions found | #Reactions total | Reactions ratio | Species identifier | Species name        | Submitted entities found                                                             |
|----------------------|--------------------------------------------------------------------|-----------------|-----------------|----------------|--------------------|-----------------|------------------|------------------|-----------------|--------------------|---------------------|--------------------------------------------------------------------------------------|
| <b>R-HSA-9613829</b> | <b>Chaperone Mediated Autophagy</b>                                | <b>4</b>        | <b>23</b>       | <b>0.002</b>   | <b>1.46E-06</b>    | <b>1.11E-03</b> | <b>15</b>        | <b>19</b>        | <b>0.0014</b>   | <b>9606</b>        | <b>Homo sapiens</b> | <b>HSPA8;HSP90AA1;HSP90AB1;UBA52</b>                                                 |
| R-HSA-2262752        | Cellular responses to stress                                       | 13              | 952             | 0.067          | 1.75E-05           | 5.41E-03        | 55               | 381              | 0.0281          | 9606               | Homo sapiens        | HSPA8;HSP90AA1;HSP90AB1;TUBB;PRDX1;H2AC19;RPSA;H4C1;UBA52;LRP6;RPL6;HSP90B1          |
| R-HSA-8953897        | Cellular responses to stimuli                                      | 13              | 970             | 0.068          | 2.14E-05           | 5.41E-03        | 55               | 412              | 0.0303          | 9606               | Homo sapiens        | HSPA8;HSP90AA1;HSP90AB1;TUBB;PRDX1;H2AC19;RPSA;H4C1;UBA52;LRP6;RPL6;HSP90B1          |
| R-HSA-1266738        | Developmental Biology                                              | 14              | 1263            | 0.089          | 7.81E-05           | 1.11E-02        | 66               | 556              | 0.0410          | 9606               | Homo sapiens        | HSPA8;HSP90AA1;HSP90AB1;JUP;TUBB;ANXA4;H2AC19;RPSA;RPL6;ACTG1;KRT19;KRT18;H4C1;UBA52 |
| R-HSA-449147         | Signaling by Interleukins                                          | 10              | 643             | 0.045          | 6.73E-05           | 1.11E-02        | 17               | 493              | 0.0363          | 9606               | Homo sapiens        | HSPA8;HSP90AA1;HNRNPA2B1;TALDO1;UBA52;HSP90B1                                        |
| R-HSA-9013418        | RHOBTB2 GTPase cycle                                               | 3               | 24              | 0.002          | 8.79E-05           | 1.11E-02        | 2                | 2                | 0.0001          | 9606               | Homo sapiens        | HSP90AA1;HSP90AB1;ACTG1                                                              |
| R-HSA-422475         | Axon guidance                                                      | 9               | 585             | 0.041          | 1.78E-04           | 1.22E-02        | 18               | 298              | 0.0219          | 9606               | Homo sapiens        | HSPA8;HSP90AA1;HSP90AB1;TUBB;ANXA4;RPSA;UBA52;RPL6;ACTG1                             |
| R-HSA-9675108        | Nervous system development                                         | 9               | 621             | 0.044          | 2.77E-04           | 1.22E-02        | 18               | 324              | 0.0239          | 9606               | Homo sapiens        | HSPA8;HSP90AA1;HSP90AB1;TUBB;ANXA4;RPSA;UBA52;RPL6;ACTG1                             |
| <b>R-HSA-9612973</b> | <b>Autophagy</b>                                                   | <b>5</b>        | <b>166</b>      | <b>0.012</b>   | <b>2.92E-04</b>    | <b>1.22E-02</b> | <b>37</b>        | <b>108</b>       | <b>0.0080</b>   | <b>9606</b>        | <b>Homo sapiens</b> | <b>HSPA8;HSP90AA1;HSP90AB1;TUBB;UBA52</b>                                            |
| R-HSA-9663891        | Selective autophagy                                                | 4               | 89              | 0.006          | 2.77E-04           | 1.22E-02        | 20               | 48               | 0.0035          | 9606               | Homo sapiens        | HSPA8;HSP90AA1;TUBB;UBA52                                                            |
| R-HSA-3371497        | HSP90 chaperone cycle for steroid hormone receptors (SHR) in th    | 4               | 72              | 0.005          | 1.24E-04           | 1.22E-02        | 16               | 16               | 0.0012          | 9606               | Homo sapiens        | HSPA8;HSP90AA1;HSP90AB1;TUBB                                                         |
| R-HSA-8852276        | The role of GTS1 in G2/M progression after G2 checkpoint           | 4               | 83              | 0.006          | 2.13E-04           | 1.22E-02        | 5                | 10               | 0.0007          | 9606               | Homo sapiens        | HSP90AA1;HSP90AB1;TUBB;UBA52                                                         |
| R-HSA-2565942        | Regulation of PLK1 Activity at G2/M Transition                     | 4               | 92              | 0.006          | 3.14E-04           | 1.22E-02        | 5                | 12               | 0.0009          | 9606               | Homo sapiens        | HSP90AA1;TUBB;UBA52                                                                  |
| R-HSA-8950505        | Gene and protein expression by JAK-STAT signaling after Interleu   | 4               | 73              | 0.005          | 1.31E-04           | 1.22E-02        | 2                | 36               | 0.0027          | 9606               | Homo sapiens        | HNRNPA2B1;TALDO1                                                                     |
| R-HSA-9020591        | Interleukin-12 signaling                                           | 4               | 84              | 0.006          | 2.23E-04           | 1.22E-02        | 2                | 56               | 0.0041          | 9606               | Homo sapiens        | HNRNPA2B1;TALDO1                                                                     |
| R-HSA-389958         | Cooperation of Prefoldin and Tric/CCT in actin and tubulin folding | 3               | 37              | 0.003          | 3.12E-04           | 1.22E-02        | 6                | 6                | 0.0004          | 9606               | Homo sapiens        | CCT3;TUBB;CCT4                                                                       |
| R-HSA-389957         | Prefoldin mediated transfer of substrate to CCT/Tric               | 3               | 29              | 0.002          | 1.53E-04           | 1.22E-02        | 2                | 2                | 0.0001          | 9606               | Homo sapiens        | CCT3;TUBB;CCT4                                                                       |
| R-HSA-389960         | Formation of tubulin folding intermediates by CCT/Tric             | 3               | 30              | 0.002          | 1.69E-04           | 1.22E-02        | 2                | 2                | 0.0001          | 9606               | Homo sapiens        | CCT3;TUBB;CCT4                                                                       |
| R-HSA-9706574        | RHOBTB2 GTPase Cycle                                               | 3               | 36              | 0.003          | 2.88E-04           | 1.22E-02        | 2                | 4                | 0.0003          | 9606               | Homo sapiens        | HSP90AA1;HSP90AB1;ACTG1                                                              |
| R-HSA-168273         | Influenza Viral RNA Transcription and Replication                  | 5               | 176             | 0.012          | 3.81E-04           | 1.29E-02        | 3                | 14               | 0.0010          | 9606               | Homo sapiens        | HSP90AA1;RPSA;UBA52;RPL6;IPO5                                                        |
| R-HSA-390466         | Chaperonin-mediated protein folding                                | 4               | 96              | 0.007          | 3.68E-04           | 1.29E-02        | 16               | 19               | 0.0014          | 9606               | Homo sapiens        | CCT3;TUBB;GAPDH;CCT4                                                                 |
| R-HSA-447115         | Interleukin-12 family signaling                                    | 4               | 96              | 0.007          | 3.68E-04           | 1.29E-02        | 2                | 114              | 0.0084          | 9606               | Homo sapiens        | HNRNPA2B1;TALDO1                                                                     |
| R-HSA-390471         | Association of Tric/CCT with target proteins during biosynthesis   | 3               | 40              | 0.003          | 3.91E-04           | 1.29E-02        | 2                | 2                | 0.0001          | 9606               | Homo sapiens        | CCT3;GAPDH;CCT4                                                                      |
| R-HSA-391251         | Protein folding                                                    | 4               | 102             | 0.007          | 4.62E-04           | 1.39E-02        | 22               | 28               | 0.0021          | 9606               | Homo sapiens        | CCT3;TUBB;GAPDH;CCT4                                                                 |
| R-HSA-156842         | Eukaryotic Translation Elongation                                  | 4               | 102             | 0.007          | 4.62E-04           | 1.39E-02        | 6                | 9                | 0.0007          | 9606               | Homo sapiens        | EEF1G;RPSA;UBA52;RPL6                                                                |
| R-HSA-70171          | Glycolysis                                                         | 4               | 110             | 0.008          | 6.13E-04           | 1.56E-02        | 2                | 24               | 0.0018          | 9606               | Homo sapiens        | PKM;GAPDH                                                                            |
| R-HSA-9646399        | Aggrephagy                                                         | 3               | 47              | 0.003          | 6.24E-04           | 1.56E-02        | 13               | 15               | 0.0011          | 9606               | Homo sapiens        | HSP90AA1;TUBB;UBA52                                                                  |
| R-HSA-3371568        | Attenuation phase                                                  | 3               | 47              | 0.003          | 6.24E-04           | 1.56E-02        | 4                | 5                | 0.0004          | 9606               | Homo sapiens        | HSPA8;HSP90AA1;HSP90AB1                                                              |
| R-HSA-163754         | Insulin effects increased synthesis of Xylulose-5-Phosphate        | 2               | 10              | 0.001          | 5.88E-04           | 1.56E-02        | 3                | 3                | 0.0002          | 9606               | Homo sapiens        | TALDO1;TKT                                                                           |
| R-HSA-5336415        | Uptake and function of diphtheria toxin                            | 2               | 10              | 0.001          | 5.88E-04           | 1.56E-02        | 1                | 5                | 0.0004          | 9606               | Homo sapiens        | HSP90AA1;HSP90AB1                                                                    |
| R-HSA-168255         | Influenza Infection                                                | 5               | 200             | 0.014          | 6.78E-04           | 1.63E-02        | 3                | 59               | 0.0043          | 9606               | Homo sapiens        | HSP90AA1;RPSA;UBA52;RPL6;IPO5                                                        |
| R-HSA-69275          | G2/M Transition                                                    | 5               | 212             | 0.015          | 7.79E-04           | 1.92E-02        | 22               | 78               | 0.0057          | 9606               | Homo sapiens        | HSP90AA1;HSP90AB1;TUBB;UBA52                                                         |
| R-HSA-453274         | Mitotic G2-G2/M phases                                             | 5               | 214             | 0.015          | 9.17E-04           | 1.92E-02        | 22               | 80               | 0.0059          | 9606               | Homo sapiens        | HSP90AA1;HSP90AB1;TUBB;UBA52                                                         |
| R-HSA-5617833        | Cilium Assembly                                                    | 5               | 210             | 0.015          | 8.43E-04           | 1.92E-02        | 17               | 50               | 0.0037          | 9606               | Homo sapiens        | CCT3;HSP90AA1;TUBB;CCT4                                                              |
| R-HSA-6785807        | Interleukin-4 and Interleukin-13 signaling                         | 5               | 211             | 0.015          | 8.61E-04           | 1.92E-02        | 3                | 47               | 0.0035          | 9606               | Homo sapiens        | HSPA8;HSP90AA1;HSP90B1                                                               |
| R-HSA-71387          | Metabolism of carbohydrates                                        | 7               | 456             | 0.032          | 0.001016305        | 2.03E-02        | 11               | 243              | 0.0179          | 9606               | Homo sapiens        | PKM;TALDO1;TKT;UBA52;GAPDH                                                           |
| R-HSA-390450         | Folding of actin by CCT/Tric                                       | 2               | 13              | 0.001          | 9.87E-04           | 2.03E-02        | 2                | 2                | 0.0001          | 9606               | Homo sapiens        | CCT3;CCT4                                                                            |
| R-HSA-192905         | vRNP Assembly                                                      | 2               | 14              | 0.001          | 0.001142541        | 2.17E-02        | 1                | 2                | 0.0001          | 9606               | Homo sapiens        | HSP90AA1;IPO5                                                                        |
| R-HSA-3371571        | HSF1-dependent transactivation                                     | 3               | 59              | 0.004          | 0.001197748        | 2.28E-02        | 5                | 8                | 0.0006          | 9606               | Homo sapiens        | HSPA8;HSP90AA1;HSP90AB1                                                              |
| R-HSA-381183         | ATF6 (ATF6-alpha) activates chaperone genes                        | 2               | 15              | 0.001          | 0.001308662        | 2.36E-02        | 1                | 5                | 0.0004          | 9606               | Homo sapiens        | HSP90B1                                                                              |
| R-HSA-70326          | Glucose metabolism                                                 | 4               | 140             | 0.010          | 0.001488626        | 2.68E-02        | 3                | 50               | 0.0037          | 9606               | Homo sapiens        | PKM;GAPDH                                                                            |
| R-HSA-381033         | ATF6 (ATF6-alpha) activates chaperones                             | 2               | 17              | 0.001          | 0.00167341         | 3.01E-02        | 1                | 10               | 0.0007          | 9606               | Homo sapiens        | HSP90B1                                                                              |
| R-HSA-5663205        | Infectious disease                                                 | 12              | 1357            | 0.095          | 0.002114039        | 3.17E-02        | 55               | 752              | 0.0554          | 9606               | Homo sapiens        | HSP90AA1;HSP90AB1;TUBB;H2AC19;RPSA;H4C1;UBA52;RPL6;ACTG1;IPO5                        |
| <b>R-HSA-1632852</b> | <b>Macroautophagy</b>                                              | <b>4</b>        | <b>150</b>      | <b>0.011</b>   | <b>0.001912184</b> | <b>3.17E-02</b> | <b>20</b>        | <b>87</b>        | <b>0.0064</b>   | <b>9606</b>        | <b>Homo sapiens</b> | <b>HSPA8;HSP90AA1;TUBB;UBA52</b>                                                     |
| R-HSA-9018519        | Estrogen-dependent gene expression                                 | 4               | 154             | 0.011          | 0.002102838        | 3.17E-02        | 15               | 66               | 0.0049          | 9606               | Homo sapiens        | HSP90AA1;HSP90AB1;H2AC19;H4C1                                                        |
| R-HSA-380284         | Loss of proteins required for interphase microtubule organization  | 3               | 71              | 0.005          | 0.002026779        | 3.17E-02        | 3                | 3                | 0.0002          | 9606               | Homo sapiens        | HSP90AA1;TUBB                                                                        |
| R-HSA-380259         | Loss of Nlp from mitotic centrosomes                               | 3               | 71              | 0.005          | 0.002026779        | 3.17E-02        | 2                | 2                | 0.0001          | 9606               | Homo sapiens        | HSP90AA1;TUBB                                                                        |
| R-HSA-399954         | Sema3A PAK dependent Axon repulsion                                | 2               | 19              | 0.001          | 0.002081           | 3.17E-02        | 2                | 6                | 0.0004          | 9606               | Homo sapiens        | HSP90AA1;HSP90AB1                                                                    |
| R-HSA-8854518        | AURKA Activation by TPX2                                           | 3               | 74              | 0.005          | 0.0022779          | 3.42E-02        | 2                | 2                | 0.0001          | 9606               | Homo sapiens        | HSP90AA1;TUBB                                                                        |
| R-HSA-380287         | Centrosome maturation                                              | 3               | 83              | 0.006          | 0.003144167        | 4.40E-02        | 6                | 6                | 0.0004          | 9606               | Homo sapiens        | HSP90AA1;TUBB                                                                        |
| R-HSA-380270         | Recruitment of mitotic centrosome proteins and complexes           | 3               | 81              | 0.006          | 0.002936647        | 4.40E-02        | 3                | 3                | 0.0002          | 9606               | Homo sapiens        | HSP90AA1;TUBB                                                                        |
| R-HSA-68886          | M Phase                                                            | 6               | 416             | 0.029          | 0.003246889        | 4.55E-02        | 22               | 91               | 0.0067          | 9606               | Homo sapiens        | HSP90AA1;TUBB;H2AC19;H4C1;UBA52                                                      |
| R-HSA-977225         | Amyloid fiber formation                                            | 3               | 89              | 0.006          | 0.003820042        | 4.88E-02        | 6                | 33               | 0.0024          | 9606               | Homo sapiens        | H2AC19;H4C1;UBA52                                                                    |
| R-HSA-2559582        | Senescence-Associated Secretory Phenotype (SASP)                   | 3               | 91              | 0.006          | 0.004063488        | 4.88E-02        | 3                | 22               | 0.0016          | 9606               | Homo sapiens        | H2AC19;H4C1;UBA52                                                                    |
| R-HSA-9645723        | Diseases of programmed cell death                                  | 3               | 90              | 0.006          | 0.003940615        | 4.88E-02        | 2                | 28               | 0.0021          | 9606               | Homo sapiens        | PRDX1;H2AC19;H4C1                                                                    |
| R-HSA-9679191        | Potential therapeutics for SARS                                    | 3               | 91              | 0.006          | 0.004063488        | 4.88E-02        | 2                | 34               | 0.0025          | 9606               | Homo sapiens        | HSP90AA1;HSP90AB1;TUBB                                                               |
| R-HSA-5637815        | Signaling by Ligand-Responsive EGFR Variants in Cancer             | 2               | 26              | 0.002          | 0.003836455        | 4.88E-02        | 23               | 23               | 0.0017          | 9606               | Homo sapiens        | HSP90AA1;UBA52                                                                       |
| R-HSA-1236382        | Constitutive Signaling by Ligand-Responsive EGFR Cancer Variant    | 2               | 26              | 0.002          | 0.003836455        | 4.88E-02        | 23               | 23               | 0.0017          | 9606               | Homo sapiens        | HSP90AA1;UBA52                                                                       |
| R-HSA-5620922        | BBSome-mediated cargo-targeting to cilium                          | 2               | 25              | 0.002          | 0.003554934        | 4.88E-02        | 1                | 5                | 0.0004          | 9606               | Homo sapiens        | CCT3;CCT4                                                                            |
| R-HSA-1280215        | Cytokine Signaling in Immune system                                | 10              | 1092            | 0.077          | 0.004120042        | 4.94E-02        | 25               | 708              | 0.0521          | 9606               | Homo sapiens        | HSPA8;HSP90AA1;HNRNPA2B1;TALDO1;UBA52;HSP90B1                                        |
| R-HSA-69278          | Cell Cycle, Mitotic                                                | 7               | 596             | 0.042          | 0.004567039        | 5.48E-02        | 67               | 350              | 0.0258          | 9606               | Homo sapiens        | HSP90AA1;HSP90AB1;TUBB;H2AC19;H4C1;UBA52                                             |
| R-HSA-5620912        | Anchoring of the basal body to the plasma membrane                 | 3               | 99              | 0.007          | 0.005130885        | 5.64E-02        | 8                | 9                | 0.0007          | 9606               | Homo sapiens        | HSP90AA1;TUBB                                                                        |
| R-HSA-156902         | Peptide chain elongation                                           | 3               | 97              | 0.007          | 0.004849792        | 5.64E-02        | 4                | 5                | 0.0004          | 9606               | Homo sapiens        | RPSA;UBA52;RPL6                                                                      |
| R-HSA-380320         | Recruitment of NuMA to mitotic centrosomes                         | 3               | 97              | 0.007          | 0.004849792        | 5.64E-02        | 2                | 2                | 0.0001          | 9606               | Homo sapiens        | HSP90AA1;TUBB                                                                        |
| R-HSA-1643685        | Disease                                                            | 16              | 2431            | 0.170          | 0.007105283        | 5.76E-02        | 164              | 1632             | 0.1202          | 9606               | Homo sapiens        | HSP90AA1;HSP90AB1;TUBB;H2AC19;TALDO1;RPSA;RPL6;ACTG1;IPO5;EEF1G;PRDX1;NF1;H4C1;UBA52 |
| R-HSA-6798695        | Neutrophil degranulation                                           | 6               | 480             | 0.034          | 0.006471569        | 5.76E-02        | 4                | 10               | 0.0007          | 9606               | Homo sapiens        | HSPA8;HSP90AA1;PKM;HSP90AB1;JUP;TUBB                                                 |
| R-HSA-72766          | Translation                                                        | 5               | 339             | 0.024          | 0.006597343        | 5.76E-02        | 27               | 99               | 0.0073          | 9606               | Homo sapiens        | EEF1G;RPSA;UBA52;TARS1;RPL6                                                          |
| R-HSA-1852241        | Organelle biogenesis and maintenance                               | 5               | 338             | 0.024          | 0.006517566        | 5.76E-02        | 17               | 86               | 0.0063          | 9606               | Homo sapiens        | CCT3;HSP90AA1;TUBB;CCT4                                                              |
| R-HSA-9679506        | SARS-CoV Infections                                                | 4               | 217             | 0.015          | 0.007059251        | 5.76E-02        | 4                | 256              | 0.0189          | 9606               | Homo sapiens        | HSP90AA1;HSP90AB1;TUBB;UBA52                                                         |
| R-HSA-168928         | DDX58/IFIH1-mediated induction of interferon-alpha/beta            | 3               | 100             | 0.007          | 0.005275046        | 5.76E-02        | 7                | 53               | 0.0039          | 9606               | Homo sapiens        | HSP90AA1;HSP90AB1;UBA52                                                              |
| R-HSA-8939236        | RUNX1 regulates transcription of genes involved in differentiation | 3               | 106             | 0.007          | 0.006191331        | 5.76E-02        | 5                | 15               | 0.0011          | 9606               | Homo sapiens        | H2AC19;H4C1;UBA52                                                                    |
| R-HSA-68867          | Assembly of the pre-replicative complex                            | 3               | 102             | 0.007          | 0.005570655        | 5.76E-02        | 4                | 18               | 0.0013          | 9606               | Homo sapiens        | H2AC19;H4C1;UBA52                                                                    |
| R-HSA-72764          | Eukaryotic Translation Termination                                 | 3               | 106             | 0.007          | 0.006191331        | 5.76E-02        | 3                | 5                | 0.0004          | 9606               | Homo sapiens        | RPSA;UBA52;RPL6                                                                      |
| R-HSA-72689          | Formation of a pool of free 40S subunits                           | 3               | 106             | 0.007          | 0.006191331        | 5.76E-02        | 2                |                  |                 |                    |                     |                                                                                      |

|                      |                                                                  |          |           |              |                    |                 |          |          |               |                          |                                                                          |
|----------------------|------------------------------------------------------------------|----------|-----------|--------------|--------------------|-----------------|----------|----------|---------------|--------------------------|--------------------------------------------------------------------------|
| R-HSA-975956         | Nonsense Mediated Decay (NMD) independent of the Exon Juncti     | 3        | 101       | 0.007        | 0.005421632        | 5.76E-02        | 1        | 1        | 0.0001        | 9606 Homo sapiens        | RPSA;UBA52;RPL6                                                          |
| R-HSA-1643713        | Signaling by EGFR in Cancer                                      | 2        | 32        | 0.002        | 0.005734288        | 5.76E-02        | 40       | 42       | 0.0031        | 9606 Homo sapiens        | HSP90AA1;UBA52                                                           |
| R-HSA-5334118        | DNA methylation                                                  | 2        | 36        | 0.003        | 0.007193161        | 5.76E-02        | 7        | 7        | 0.0005        | 9606 Homo sapiens        | H2AC19;H4C1                                                              |
| R-HSA-8863795        | Downregulation of ERBB2 signaling                                | 2        | 36        | 0.003        | 0.007193161        | 5.76E-02        | 7        | 14       | 0.0010        | 9606 Homo sapiens        | HSP90AA1;UBA52                                                           |
| R-HSA-5689901        | Metalloprotease DUBs                                             | 2        | 32        | 0.002        | 0.005734288        | 5.76E-02        | 5        | 6        | 0.0004        | 9606 Homo sapiens        | H2AC19;UBA52                                                             |
| <b>R-HSA-9615710</b> | <b>Late endosomal microautophagy</b>                             | <b>2</b> | <b>35</b> | <b>0.002</b> | <b>0.006814229</b> | <b>5.76E-02</b> | <b>3</b> | <b>3</b> | <b>0.0002</b> | <b>9606 Homo sapiens</b> | <b>HSPA8;UBA52</b>                                                       |
| R-HSA-418990         | Adherens junctions interactions                                  | 2        | 35        | 0.002        | 0.006814229        | 5.76E-02        | 3        | 16       | 0.0012        | 9606 Homo sapiens        | JUP;ACTG1                                                                |
| R-HSA-171306         | Packaging Of Telomere Ends                                       | 2        | 34        | 0.002        | 0.006444727        | 5.76E-02        | 2        | 2        | 0.0001        | 9606 Homo sapiens        | H2AC19;H4C1                                                              |
| R-HSA-5626467        | RHO GTPases activate IQGAPs                                      | 2        | 36        | 0.003        | 0.007193161        | 5.76E-02        | 2        | 5        | 0.0004        | 9606 Homo sapiens        | TUBB;ACTG1                                                               |
| R-HSA-73728          | RNA Polymerase I Promoter Opening                                | 2        | 34        | 0.002        | 0.006444727        | 5.76E-02        | 1        | 2        | 0.0001        | 9606 Homo sapiens        | H2AC19;H4C1                                                              |
| R-HSA-2559580        | Oxidative Stress Induced Senescence                              | 3        | 114       | 0.008        | 0.007552809        | 6.04E-02        | 6        | 40       | 0.0029        | 9606 Homo sapiens        | H2AC19;H4C1;UBA52                                                        |
| R-HSA-192823         | Viral mRNA Translation                                           | 3        | 114       | 0.008        | 0.007552809        | 6.04E-02        | 2        | 2        | 0.0001        | 9606 Homo sapiens        | RPSA;UBA52;RPL6                                                          |
| R-HSA-1799339        | SRP-dependent cotranslational protein targeting to membrane      | 3        | 119       | 0.008        | 0.008486799        | 6.08E-02        | 5        | 5        | 0.0004        | 9606 Homo sapiens        | RPSA;UBA52;RPL6                                                          |
| R-HSA-9633012        | Response of EIF2AK4 (GCN2) to amino acid deficiency              | 3        | 115       | 0.008        | 0.007734443        | 6.08E-02        | 4        | 16       | 0.0012        | 9606 Homo sapiens        | RPSA;UBA52;RPL6                                                          |
| R-HSA-69002          | DNA Replication Pre-Initiation                                   | 3        | 120       | 0.008        | 0.008681384        | 6.08E-02        | 4        | 27       | 0.0020        | 9606 Homo sapiens        | H2AC19;H4C1;UBA52                                                        |
| R-HSA-72706          | GTP hydrolysis and joining of the 60S ribosomal subunit          | 3        | 120       | 0.008        | 0.008681384        | 6.08E-02        | 3        | 3        | 0.0002        | 9606 Homo sapiens        | RPSA;UBA52;RPL6                                                          |
| R-HSA-156827         | L13a-mediated translational silencing of Ceruloplasmin expressi  | 3        | 120       | 0.008        | 0.008681384        | 6.08E-02        | 2        | 3        | 0.0002        | 9606 Homo sapiens        | RPSA;UBA52;RPL6                                                          |
| R-HSA-211000         | Gene Silencing by RNA                                            | 3        | 120       | 0.008        | 0.008681384        | 6.08E-02        | 2        | 40       | 0.0029        | 9606 Homo sapiens        | HSP90AA1;H2AC19;H4C1                                                     |
| R-HSA-5675482        | Regulation of necroptotic cell death                             | 2        | 38        | 0.003        | 0.007979047        | 6.08E-02        | 5        | 18       | 0.0013        | 9606 Homo sapiens        | HSP90AA1;UBA52                                                           |
| R-HSA-110330         | Recognition and association of DNA glycosylase with site contain | 2        | 39        | 0.003        | 0.008385866        | 6.08E-02        | 2        | 10       | 0.0007        | 9606 Homo sapiens        | H2AC19;H4C1                                                              |
| R-HSA-68616          | Assembly of the ORC complex at the origin of replication         | 2        | 40        | 0.003        | 0.008801846        | 6.16E-02        | 2        | 11       | 0.0008        | 9606 Homo sapiens        | H2AC19;H4C1                                                              |
| R-HSA-6814122        | Cooperation of PDCL (PhlP1) and TRIC/CCT in G-protein beta foldi | 2        | 41        | 0.003        | 0.009226921        | 6.46E-02        | 8        | 11       | 0.0008        | 9606 Homo sapiens        | CCT3;CCT4                                                                |
| R-HSA-4420097        | VEGFA-VEGFR2 Pathway                                             | 3        | 127       | 0.009        | 0.01011709         | 6.46E-02        | 19       | 79       | 0.0058        | 9606 Homo sapiens        | HSP90AA1;JUP;ACTG1                                                       |
| R-HSA-72613          | Eukaryotic Translation Initiation                                | 3        | 130       | 0.009        | 0.010772208        | 6.46E-02        | 12       | 21       | 0.0015        | 9606 Homo sapiens        | RPSA;UBA52;RPL6                                                          |
| R-HSA-72737          | Cap-dependent Translation Initiation                             | 3        | 130       | 0.009        | 0.010772208        | 6.46E-02        | 10       | 18       | 0.0013        | 9606 Homo sapiens        | RPSA;UBA52;RPL6                                                          |
| R-HSA-373760         | L1CAM interactions                                               | 3        | 130       | 0.009        | 0.010772208        | 6.46E-02        | 8        | 54       | 0.0040        | 9606 Homo sapiens        | HSPA8;TUBB;ACTG1                                                         |
| R-HSA-927802         | Nonsense-Mediated Decay (NMD)                                    | 3        | 124       | 0.009        | 0.009485942        | 6.46E-02        | 5        | 6        | 0.0004        | 9606 Homo sapiens        | RPSA;UBA52;RPL6                                                          |
| R-HSA-975957         | Nonsense Mediated Decay (NMD) enhanced by the Exon Junction      | 3        | 124       | 0.009        | 0.009485942        | 6.46E-02        | 4        | 5        | 0.0004        | 9606 Homo sapiens        | RPSA;UBA52;RPL6                                                          |
| R-HSA-5218920        | VEGFR2 mediated vascular permeability                            | 2        | 44        | 0.003        | 0.010556057        | 6.46E-02        | 7        | 15       | 0.0011        | 9606 Homo sapiens        | HSP90AA1;JUP                                                             |
| R-HSA-212300         | PRC2 methylates histones and DNA                                 | 2        | 44        | 0.003        | 0.010556057        | 6.46E-02        | 4        | 4        | 0.0003        | 9606 Homo sapiens        | H2AC19;H4C1                                                              |
| R-HSA-3371511        | HSF1 activation                                                  | 2        | 43        | 0.003        | 0.010104092        | 6.46E-02        | 3        | 7        | 0.0005        | 9606 Homo sapiens        | HSP90AA1;HSP90AB1                                                        |
| R-HSA-110328         | Recognition and association of DNA glycosylase with site contain | 2        | 42        | 0.003        | 0.009661025        | 6.46E-02        | 1        | 21       | 0.0015        | 9606 Homo sapiens        | H2AC19;H4C1                                                              |
| R-HSA-6791055        | TALDO1 deficiency: failed conversion of SH7P, GA3P to Fru(6)P, E | 1        | 3         | 0.000        | 0.010456874        | 6.46E-02        | 1        | 1        | 0.0001        | 9606 Homo sapiens        | TALDO1                                                                   |
| R-HSA-6791462        | TALDO1 deficiency: failed conversion of Fru(6)P, E4P to SH7P, G  | 1        | 3         | 0.000        | 0.010456874        | 6.46E-02        | 1        | 1        | 0.0001        | 9606 Homo sapiens        | TALDO1                                                                   |
| R-HSA-427359         | SIRT1 negatively regulates rRNA expression                       | 2        | 45        | 0.003        | 0.011016855        | 6.61E-02        | 3        | 5        | 0.0004        | 9606 Homo sapiens        | H2AC19;H4C1                                                              |
| R-HSA-110331         | Cleavage of the damaged purine                                   | 2        | 45        | 0.003        | 0.011016855        | 6.61E-02        | 2        | 9        | 0.0007        | 9606 Homo sapiens        | H2AC19;H4C1                                                              |
| R-HSA-194315         | Signaling by Rho GTPases                                         | 7        | 709       | 0.050        | 0.011407215        | 6.84E-02        | 32       | 203      | 0.0150        | 9606 Homo sapiens        | HSP90AA1;HSP90AB1;JUP;TUBB;H2AC19;H4C1;ACTG1                             |
| R-HSA-71336          | Pentose phosphate pathway                                        | 2        | 46        | 0.003        | 0.011486421        | 6.89E-02        | 6        | 20       | 0.0015        | 9606 Homo sapiens        | TALDO1;TKT                                                               |
| R-HSA-5213460        | RIPK1-mediated regulated necrosis                                | 2        | 46        | 0.003        | 0.011486421        | 6.89E-02        | 5        | 34       | 0.0025        | 9606 Homo sapiens        | HSP90AA1;UBA52                                                           |
| R-HSA-73927          | Depurination                                                     | 2        | 46        | 0.003        | 0.011486421        | 6.89E-02        | 4        | 19       | 0.0014        | 9606 Homo sapiens        | H2AC19;H4C1                                                              |
| R-HSA-1640170        | Cell Cycle                                                       | 7        | 734       | 0.051        | 0.013605581        | 6.96E-02        | 91       | 449      | 0.0331        | 9606 Homo sapiens        | HSP90AA1;HSP90AB1;TUBB;H2AC19;H4C1;UBA52                                 |
| R-HSA-9716542        | Signaling by Rho GTPases, Miro GTPases and RHOBTB3               | 7        | 725       | 0.051        | 0.012781516        | 6.96E-02        | 32       | 212      | 0.0156        | 9606 Homo sapiens        | HSP90AA1;HSP90AB1;JUP;TUBB;H2AC19;H4C1;ACTG1                             |
| R-HSA-8939211        | ESR-mediated signaling                                           | 4        | 257       | 0.018        | 0.012545548        | 6.96E-02        | 20       | 111      | 0.0082        | 9606 Homo sapiens        | HSP90AA1;HSP90AB1;H2AC19;H4C1                                            |
| R-HSA-194138         | Signaling by VEGF                                                | 3        | 138       | 0.010        | 0.012637618        | 6.96E-02        | 19       | 86       | 0.0063        | 9606 Homo sapiens        | HSP90AA1;JUP;ACTG1                                                       |
| R-HSA-3371556        | Cellular response to heat stress                                 | 3        | 135       | 0.009        | 0.011917791        | 6.96E-02        | 15       | 29       | 0.0021        | 9606 Homo sapiens        | HSPA8;HSP90AA1;HSP90AB1                                                  |
| R-HSA-6809371        | Formation of the cornified envelope                              | 3        | 138       | 0.010        | 0.012637618        | 6.96E-02        | 9        | 27       | 0.0020        | 9606 Homo sapiens        | KRT19;KRT18;JUP                                                          |
| R-HSA-5625886        | Activated PKN1 stimulates transcription of AR (androgen recepto  | 2        | 49        | 0.003        | 0.012947085        | 6.96E-02        | 3        | 11       | 0.0008        | 9606 Homo sapiens        | H2AC19;H4C1                                                              |
| R-HSA-9670095        | Inhibition of DNA recombination at telomere                      | 2        | 48        | 0.003        | 0.0124516          | 6.96E-02        | 8        | 4        | 0.0003        | 9606 Homo sapiens        | H2AC19;H4C1                                                              |
| R-HSA-427389         | ERCC6 (CSB) and EHMT2 (G9a) positively regulate rRNA expressi    | 2        | 48        | 0.003        | 0.0124516          | 6.96E-02        | 2        | 4        | 0.0003        | 9606 Homo sapiens        | H2AC19;H4C1                                                              |
| R-HSA-9665230        | Drug resistance in ERBB2 KD mutants                              | 1        | 4         | 0.000        | 0.013918627        | 6.96E-02        | 8        | 8        | 0.0006        | 9606 Homo sapiens        | HSP90AA1                                                                 |
| R-HSA-9652282        | Drug-mediated inhibition of ERBB2 signaling                      | 1        | 4         | 0.000        | 0.013918627        | 6.96E-02        | 3        | 3        | 0.0002        | 9606 Homo sapiens        | HSP90AA1                                                                 |
| R-HSA-9665737        | Drug resistance in ERBB2 TMD/JMD mutants                         | 1        | 4         | 0.000        | 0.013918627        | 6.96E-02        | 1        | 1        | 0.0001        | 9606 Homo sapiens        | HSP90AA1                                                                 |
| R-HSA-9665246        | Resistance of ERBB2 KD mutants to neratinib                      | 1        | 4         | 0.000        | 0.013918627        | 6.96E-02        | 1        | 1        | 0.0001        | 9606 Homo sapiens        | HSP90AA1                                                                 |
| R-HSA-9665247        | Resistance of ERBB2 KD mutants to osimertinib                    | 1        | 4         | 0.000        | 0.013918627        | 6.96E-02        | 1        | 1        | 0.0001        | 9606 Homo sapiens        | HSP90AA1                                                                 |
| R-HSA-9665251        | Resistance of ERBB2 KD mutants to lapatinib                      | 1        | 4         | 0.000        | 0.013918627        | 6.96E-02        | 1        | 1        | 0.0001        | 9606 Homo sapiens        | HSP90AA1                                                                 |
| R-HSA-9665245        | Resistance of ERBB2 KD mutants to tesevatinib                    | 1        | 4         | 0.000        | 0.013918627        | 6.96E-02        | 1        | 1        | 0.0001        | 9606 Homo sapiens        | HSP90AA1                                                                 |
| R-HSA-9665233        | Resistance of ERBB2 KD mutants to trastuzumab                    | 1        | 4         | 0.000        | 0.013918627        | 6.96E-02        | 1        | 1        | 0.0001        | 9606 Homo sapiens        | HSP90AA1                                                                 |
| R-HSA-9665249        | Resistance of ERBB2 KD mutants to afatinib                       | 1        | 4         | 0.000        | 0.013918627        | 6.96E-02        | 1        | 1        | 0.0001        | 9606 Homo sapiens        | HSP90AA1                                                                 |
| R-HSA-9665244        | Resistance of ERBB2 KD mutants to sapitinib                      | 1        | 4         | 0.000        | 0.013918627        | 6.96E-02        | 1        | 1        | 0.0001        | 9606 Homo sapiens        | HSP90AA1                                                                 |
| R-HSA-9665250        | Resistance of ERBB2 KD mutants to AEE788                         | 1        | 4         | 0.000        | 0.013918627        | 6.96E-02        | 1        | 1        | 0.0001        | 9606 Homo sapiens        | HSP90AA1                                                                 |
| R-HSA-73928          | Depyrimidination                                                 | 2        | 51        | 0.004        | 0.013963528        | 6.98E-02        | 2        | 41       | 0.0030        | 9606 Homo sapiens        | H2AC19;H4C1                                                              |
| R-HSA-110329         | Cleavage of the damaged pyrimidine                               | 2        | 51        | 0.004        | 0.013963528        | 6.98E-02        | 1        | 20       | 0.0015        | 9606 Homo sapiens        | H2AC19;H4C1                                                              |
| R-HSA-190828         | Gap junction trafficking                                         | 2        | 52        | 0.004        | 0.014484361        | 7.24E-02        | 7        | 20       | 0.0015        | 9606 Homo sapiens        | TUBB;ACTG1                                                               |
| R-HSA-9710421        | Defective pyroptosis                                             | 2        | 52        | 0.004        | 0.014484361        | 7.24E-02        | 1        | 3        | 0.0002        | 9606 Homo sapiens        | H2AC19;H4C1                                                              |
| R-HSA-3214858        | RMTs methylate histone arginines                                 | 2        | 53        | 0.004        | 0.015013518        | 7.51E-02        | 8        | 22       | 0.0016        | 9606 Homo sapiens        | H2AC19;H4C1                                                              |
| R-HSA-168256         | Immune System                                                    | 16       | 2684      | 0.188        | 0.017983012        | 7.58E-02        | 108      | 1623     | 0.1195        | 9606 Homo sapiens        | HSPA8;HSP90AA1;PKM;HSP90AB1;JUP;TUBB;HNRNP2B1;TALDO1;UBA52;ACTG1;HSP90B1 |
| R-HSA-2029482        | Regulation of actin dynamics for phagocytic cup formation        | 3        | 158       | 0.011        | 0.018068446        | 7.58E-02        | 8        | 24       | 0.0018        | 9606 Homo sapiens        | HSP90AA1;HSP90AB1;ACTG1                                                  |
| R-HSA-2299718        | Condensation of Prophase Chromosomes                             | 2        | 55        | 0.004        | 0.016096556        | 7.58E-02        | 8        | 10       | 0.0007        | 9606 Homo sapiens        | H2AC19;H4C1                                                              |
| R-HSA-157858         | Gap junction trafficking and regulation                          | 2        | 56        | 0.004        | 0.016650313        | 7.58E-02        | 7        | 24       | 0.0018        | 9606 Homo sapiens        | TUBB;ACTG1                                                               |
| R-HSA-437239         | Recycling pathway of L1                                          | 2        | 55        | 0.004        | 0.016096556        | 7.58E-02        | 5        | 14       | 0.0010        | 9606 Homo sapiens        | TUBB;ACTG1                                                               |
| R-HSA-912446         | Meiotic recombination                                            | 2        | 58        | 0.004        | 0.017781999        | 7.58E-02        | 4        | 9        | 0.0007        | 9606 Homo sapiens        | H2AC19;H4C1                                                              |
| R-HSA-774815         | Nucleosome assembly                                              | 2        | 54        | 0.004        | 0.015550937        | 7.58E-02        | 3        | 4        | 0.0003        | 9606 Homo sapiens        | H2AC19;H4C1                                                              |
| R-HSA-606279         | Deposition of new CENPA-containing nucleosomes at the centron    | 2        | 54        | 0.004        | 0.015550937        | 7.58E-02        | 3        | 4        | 0.0003        | 9606 Homo sapiens        | H2AC19;H4C1                                                              |
| R-HSA-450408         | AUF1 (hnRNP D0) binds and destabilizes mRNA                      | 2        | 56        | 0.004        | 0.016650313        | 7.58E-02        | 2        | 4        | 0.0003        | 9606 Homo sapiens        | HSPA8;UBA52                                                              |
| R-HSA-5620920        | Cargo trafficking to the perillyl membrane                       | 2        | 57        | 0.004        | 0.017212148        | 7.58E-02        | 1        | 27       | 0.0020        | 9606 Homo sapiens        | CCT3;CCT4                                                                |
| R-HSA-5339562        | Uptake and actions of bacterial toxins                           | 2        | 60        | 0.004        | 0.018945508        | 7.58E-02        | 1        | 66       | 0.0049        | 9606 Homo sapiens        | HSP90AA1;HSP90AB1                                                        |
| R-HSA-8856828        | Clathrin-mediated endocytosis                                    | 3        | 161       | 0.011        | 0.018978862        | 7.59E-02        | 16       | 35       | 0.0026        | 9606 Homo sapiens        | HSPA8;UBA52;ACTG1                                                        |

|               |                                                                   |    |      |       |             |          |     |     |        |      |              |                                                                            |
|---------------|-------------------------------------------------------------------|----|------|-------|-------------|----------|-----|-----|--------|------|--------------|----------------------------------------------------------------------------|
| R-HSA-1221632 | Meiotic synapsis                                                  | 2  | 62   | 0.004 | 0.02014036  | 8.06E-02 | 4   | 6   | 0.0004 | 9606 | Homo sapiens | H2AC19;H4C1                                                                |
| R-HSA-5250924 | B-WICH complex positively regulates rRNA expression               | 2  | 62   | 0.004 | 0.02014036  | 8.06E-02 | 1   | 3   | 0.0002 | 9606 | Homo sapiens | H2AC19;H4C1                                                                |
| R-HSA-73929   | Base-Excision Repair, AP Site Formation                           | 2  | 63   | 0.004 | 0.020749391 | 8.30E-02 | 6   | 64  | 0.0047 | 9606 | Homo sapiens | H2AC19;H4C1                                                                |
| R-HSA-3214815 | HDACs deacetylate histones                                        | 2  | 63   | 0.004 | 0.020749391 | 8.30E-02 | 4   | 5   | 0.0004 | 9606 | Homo sapiens | H2AC19;H4C1                                                                |
| R-HSA-73772   | RNA Polymerase I Promoter Escape                                  | 2  | 64   | 0.004 | 0.021366079 | 8.55E-02 | 1   | 2   | 0.0001 | 9606 | Homo sapiens | H2AC19;H4C1                                                                |
| R-HSA-70263   | Gluconeogenesis                                                   | 2  | 66   | 0.005 | 0.022622194 | 9.05E-02 | 1   | 26  | 0.0019 | 9606 | Homo sapiens | GAPDH                                                                      |
| R-HSA-69306   | DNA Replication                                                   | 3  | 174  | 0.012 | 0.023215314 | 9.29E-02 | 8   | 53  | 0.0039 | 9606 | Homo sapiens | H2AC19;H4C1;UBA52                                                          |
| R-HSA-5693565 | Recruitment and ATM-mediated phosphorylation of repair and sli    | 2  | 67   | 0.005 | 0.023261504 | 9.30E-02 | 30  | 39  | 0.0029 | 9606 | Homo sapiens | H4C1;UBA52                                                                 |
| R-HSA-421270  | Cell-cell junction organization                                   | 2  | 67   | 0.005 | 0.023261504 | 9.30E-02 | 3   | 21  | 0.0015 | 9606 | Homo sapiens | JUP;ACTG1                                                                  |
| R-HSA-201722  | Formation of the beta-catenin:TCF transactivating complex         | 2  | 67   | 0.005 | 0.023261504 | 9.30E-02 | 2   | 13  | 0.0010 | 9606 | Homo sapiens | H2AC19;H4C1                                                                |
| R-HSA-1227986 | Signaling by ERBB2                                                | 2  | 68   | 0.005 | 0.023908238 | 9.56E-02 | 12  | 46  | 0.0034 | 9606 | Homo sapiens | HSP90AA1;UBA52                                                             |
| R-HSA-9711097 | Cellular response to starvation                                   | 3  | 176  | 0.012 | 0.023909171 | 9.56E-02 | 4   | 28  | 0.0021 | 9606 | Homo sapiens | PSA;UBA52;RPL6                                                             |
| R-HSA-5663202 | Diseases of signal transduction by growth factor receptors and se | 5  | 498  | 0.035 | 0.029868403 | 9.67E-02 | 101 | 484 | 0.0356 | 9606 | Homo sapiens | EEF1G;HSP90AA1;NF1;UBA52;ACTG1                                             |
| R-HSA-195258  | RHO GTPase Effectors                                              | 4  | 326  | 0.023 | 0.027274544 | 9.67E-02 | 23  | 113 | 0.0083 | 9606 | Homo sapiens | TUBB;H2AC19;H4C1;ACTG1                                                     |
| R-HSA-72163   | mRNA Splicing - Major Pathway                                     | 3  | 185  | 0.013 | 0.027170485 | 9.67E-02 | 8   | 9   | 0.0007 | 9606 | Homo sapiens | HSPA8;HNRNP2B1;SRF3                                                        |
| R-HSA-2029480 | Fcgamma receptor (FCGR) dependent phagocytosis                    | 3  | 193  | 0.014 | 0.030259999 | 9.67E-02 | 8   | 42  | 0.0031 | 9606 | Homo sapiens | HSP90AA1;HSP90AB1;ACTG1                                                    |
| R-HSA-72172   | mRNA Splicing                                                     | 3  | 196  | 0.014 | 0.031464666 | 9.67E-02 | 8   | 14  | 0.0010 | 9606 | Homo sapiens | HSPA8;HNRNP2B1;SRF3                                                        |
| R-HSA-9010553 | Regulation of expression of SLITs and ROBOs                       | 3  | 183  | 0.013 | 0.026426108 | 9.67E-02 | 5   | 20  | 0.0015 | 9606 | Homo sapiens | PSA;UBA52;RPL6                                                             |
| R-HSA-2408522 | Selenoamino acid metabolism                                       | 3  | 180  | 0.013 | 0.02533058  | 9.67E-02 | 2   | 33  | 0.0024 | 9606 | Homo sapiens | PSA;UBA52;RPL6                                                             |
| R-HSA-6791226 | Major pathway of rRNA processing in the nucleolus and cytosol     | 3  | 189  | 0.013 | 0.028692861 | 9.67E-02 | 2   | 7   | 0.0005 | 9606 | Homo sapiens | PSA;UBA52;RPL6                                                             |
| R-HSA-5693606 | DNA Double Strand Break Response                                  | 2  | 75   | 0.005 | 0.02863847  | 9.67E-02 | 30  | 48  | 0.0035 | 9606 | Homo sapiens | H4C1;UBA52                                                                 |
| R-HSA-8936459 | RUNX1 regulates genes involved in megakaryocyte differentiation   | 2  | 78   | 0.005 | 0.03077142  | 9.67E-02 | 20  | 33  | 0.0024 | 9606 | Homo sapiens | H2AC19;H4C1                                                                |
| R-HSA-168643  | Nucleotide-binding domain, leucine rich repeat containing recept  | 2  | 71   | 0.005 | 0.025892415 | 9.67E-02 | 14  | 46  | 0.0034 | 9606 | Homo sapiens | HSP90AB1;UBA52                                                             |
| R-HSA-5625740 | RHO GTPases activate PKNs                                         | 2  | 80   | 0.006 | 0.032227517 | 9.67E-02 | 8   | 20  | 0.0015 | 9606 | Homo sapiens | H2AC19;H4C1                                                                |
| R-HSA-5658442 | Regulation of RAS by GAPs                                         | 2  | 71   | 0.005 | 0.025892415 | 9.67E-02 | 5   | 5   | 0.0004 | 9606 | Homo sapiens | NF1;UBA52                                                                  |
| R-HSA-5218859 | Regulated Necrosis                                                | 2  | 77   | 0.005 | 0.030053556 | 9.67E-02 | 5   | 57  | 0.0042 | 9606 | Homo sapiens | HSP90AA1;UBA52                                                             |
| R-HSA-427413  | NoRC negatively regulates rRNA expression                         | 2  | 80   | 0.006 | 0.032227517 | 9.67E-02 | 3   | 7   | 0.0005 | 9606 | Homo sapiens | H2AC19;H4C1                                                                |
| R-HSA-5250913 | Positive epigenetic regulation of rRNA expression                 | 2  | 80   | 0.006 | 0.032227517 | 9.67E-02 | 3   | 7   | 0.0005 | 9606 | Homo sapiens | H2AC19;H4C1                                                                |
| R-HSA-373755  | Semaphorin interactions                                           | 2  | 71   | 0.005 | 0.025892415 | 9.67E-02 | 2   | 41  | 0.0030 | 9606 | Homo sapiens | HSP90AA1;HSP90AB1                                                          |
| R-HSA-2559586 | DNA Damage/Telomere Stress Induced Senescence                     | 2  | 71   | 0.005 | 0.025892415 | 9.67E-02 | 1   | 18  | 0.0013 | 9606 | Homo sapiens | H2AC19;H4C1                                                                |
| R-HSA-9616222 | Transcriptional regulation of granulopoiesis                      | 2  | 71   | 0.005 | 0.025892415 | 9.67E-02 | 1   | 27  | 0.0020 | 9606 | Homo sapiens | H2AC19;H4C1                                                                |
| R-HSA-8937144 | Aryl hydrocarbon receptor signalling                              | 1  | 8    | 0.001 | 0.027647347 | 9.67E-02 | 2   | 5   | 0.0004 | 9606 | Homo sapiens | HSP90AB1                                                                   |
| R-HSA-6791465 | Pentose phosphate pathway disease                                 | 1  | 8    | 0.001 | 0.027647347 | 9.67E-02 | 3   | 4   | 0.0003 | 9606 | Homo sapiens | TALDO1                                                                     |
| R-HSA-9706377 | FLT3 signaling by CBL mutants                                     | 1  | 7    | 0.000 | 0.024232831 | 9.67E-02 | 1   | 1   | 0.0001 | 9606 | Homo sapiens | UBA52                                                                      |
| R-HSA-9694493 | Maturation of protein E                                           | 1  | 8    | 0.001 | 0.027647347 | 9.67E-02 | 1   | 5   | 0.0004 | 9606 | Homo sapiens | UBA52                                                                      |
| R-HSA-9683683 | Maturation of protein E                                           | 1  | 8    | 0.001 | 0.027647347 | 9.67E-02 | 1   | 5   | 0.0004 | 9606 | Homo sapiens | UBA52                                                                      |
| R-HSA-6802953 | RAS signaling downstream of NF1 loss-of-function variants         | 1  | 9    | 0.001 | 0.031050153 | 9.67E-02 | 1   | 1   | 0.0001 | 9606 | Homo sapiens | NF1                                                                        |
| R-HSA-1445148 | Translocation of SLC2A4 (GLUT4) to the plasma membrane            | 2  | 81   | 0.006 | 0.032965642 | 9.89E-02 | 3   | 15  | 0.0011 | 9606 | Homo sapiens | TUBB;ACTG1                                                                 |
| R-HSA-5663084 | Diseases of carbohydrate metabolism                               | 2  | 81   | 0.006 | 0.032965642 | 9.89E-02 | 3   | 44  | 0.0032 | 9606 | Homo sapiens | TALDO1;UBA52                                                               |
| R-HSA-5578749 | Transcriptional regulation by small RNAs                          | 2  | 81   | 0.006 | 0.032965642 | 9.89E-02 | 1   | 5   | 0.0004 | 9606 | Homo sapiens | H2AC19;H4C1                                                                |
| R-HSA-2559583 | Cellular Senescence                                               | 3  | 200  | 0.014 | 0.033109871 | 9.93E-02 | 10  | 90  | 0.0066 | 9606 | Homo sapiens | H2AC19;H4C1;UBA52                                                          |
| R-HSA-8948747 | Regulation of PTEN localization                                   | 1  | 10   | 0.001 | 0.034441287 | 1.03E-01 | 2   | 4   | 0.0003 | 9606 | Homo sapiens | UBA52                                                                      |
| R-HSA-447041  | CHL1 interactions                                                 | 1  | 10   | 0.001 | 0.034441287 | 1.03E-01 | 1   | 5   | 0.0004 | 9606 | Homo sapiens | HSPA8                                                                      |
| R-HSA-8868773 | rRNA processing in the nucleus and cytosol                        | 3  | 207  | 0.015 | 0.03609576  | 1.08E-01 | 2   | 15  | 0.0011 | 9606 | Homo sapiens | PSA;UBA52;RPL6                                                             |
| R-HSA-392499  | Metabolism of proteins                                            | 13 | 2205 | 0.155 | 0.037222073 | 1.09E-01 | 157 | 798 | 0.0588 | 9606 | Homo sapiens | CCT3;HSPA8;TUBB;H2AC19;RPSA;RPL6;HSP90B1;EEF1G;H4C1;UBA52;TARS1;GAPDH;CCT4 |
| R-HSA-168249  | Innate Immune System                                              | 9  | 1334 | 0.093 | 0.040443628 | 1.09E-01 | 80  | 710 | 0.0523 | 9606 | Homo sapiens | HSPA8;HSP90AA1;PKM1;HSP90AB1;JUP;TUBB;UBA52;ACTG1;HSP90B1                  |
| R-HSA-9006931 | Signaling by Nuclear Receptors                                    | 4  | 387  | 0.027 | 0.046452616 | 1.09E-01 | 20  | 192 | 0.0141 | 9606 | Homo sapiens | HSP90AA1;HSP90AB1;H2AC19;H4C1                                              |
| R-HSA-6805567 | Keratinization                                                    | 3  | 226  | 0.016 | 0.04487783  | 1.09E-01 | 16  | 34  | 0.0025 | 9606 | Homo sapiens | KRT19;KRT18;JUP                                                            |
| R-HSA-201681  | TCF dependent signaling in response to WNT                        | 3  | 216  | 0.015 | 0.040133082 | 1.09E-01 | 15  | 21  | 0.0052 | 9606 | Homo sapiens | H2AC19;H4C1;UBA52                                                          |
| R-HSA-68877   | Mitotic Prometaphase                                              | 3  | 211  | 0.015 | 0.037862696 | 1.09E-01 | 9   | 20  | 0.0015 | 9606 | Homo sapiens | HSP90AA1;TUBB                                                              |
| R-HSA-9609690 | HCMV Early Events                                                 | 3  | 215  | 0.015 | 0.039673537 | 1.09E-01 | 7   | 12  | 0.0009 | 9606 | Homo sapiens | TUBB;H2AC19;H4C1                                                           |
| R-HSA-9711123 | Cellular response to chemical stress                              | 3  | 212  | 0.015 | 0.038311299 | 1.09E-01 | 5   | 71  | 0.0052 | 9606 | Homo sapiens | PRDX1;UBA52;LRPPRC                                                         |
| R-HSA-376176  | Signaling by ROBO receptors                                       | 3  | 235  | 0.016 | 0.049377788 | 1.09E-01 | 5   | 60  | 0.0044 | 9606 | Homo sapiens | PSA;UBA52;RPL6                                                             |
| R-HSA-72312   | rRNA processing                                                   | 3  | 245  | 0.017 | 0.054628601 | 1.09E-01 | 2   | 21  | 0.0015 | 9606 | Homo sapiens | PSA;UBA52;RPL6                                                             |
| R-HSA-6802957 | Oncogenic MAPK signaling                                          | 2  | 93   | 0.007 | 0.042326409 | 1.09E-01 | 25  | 46  | 0.0034 | 9606 | Homo sapiens | NF1;ACTG1                                                                  |
| R-HSA-1500620 | Meiosis                                                           | 2  | 92   | 0.006 | 0.041512004 | 1.09E-01 | 8   | 15  | 0.0011 | 9606 | Homo sapiens | H2AC19;H4C1                                                                |
| R-HSA-5250941 | Negative epigenetic regulation of rRNA expression                 | 2  | 89   | 0.006 | 0.039105429 | 1.09E-01 | 6   | 12  | 0.0009 | 9606 | Homo sapiens | H2AC19;H4C1                                                                |
| R-HSA-73884   | Base Excision Repair                                              | 2  | 100  | 0.007 | 0.048193067 | 1.09E-01 | 6   | 107 | 0.0079 | 9606 | Homo sapiens | H2AC19;H4C1                                                                |
| R-HSA-446728  | Cell junction organization                                        | 2  | 94   | 0.007 | 0.043146836 | 1.09E-01 | 4   | 37  | 0.0027 | 9606 | Homo sapiens | JUP;ACTG1                                                                  |
| R-HSA-5689603 | UCH proteinases                                                   | 2  | 98   | 0.007 | 0.046487763 | 1.09E-01 | 4   | 11  | 0.0008 | 9606 | Homo sapiens | H2AC19;UBA52                                                               |
| R-HSA-1912408 | Pre-NOTCH Transcription and Translation                           | 2  | 89   | 0.006 | 0.039105429 | 1.09E-01 | 3   | 28  | 0.0021 | 9606 | Homo sapiens | H2AC19;H4C1                                                                |
| R-HSA-73854   | RNA Polymerase I Promoter Clearance                               | 2  | 87   | 0.006 | 0.037532089 | 1.09E-01 | 2   | 10  | 0.0007 | 9606 | Homo sapiens | H2AC19;H4C1                                                                |
| R-HSA-73864   | RNA Polymerase I Transcription                                    | 2  | 89   | 0.006 | 0.039105429 | 1.09E-01 | 2   | 14  | 0.0010 | 9606 | Homo sapiens | H2AC19;H4C1                                                                |
| R-HSA-5693607 | Processing of DNA double-strand break ends                        | 2  | 90   | 0.006 | 0.039901464 | 1.09E-01 | 2   | 17  | 0.0013 | 9606 | Homo sapiens | H4C1;UBA52                                                                 |
| R-HSA-450531  | Regulation of mRNA stability by proteins that bind AU-rich elem   | 2  | 93   | 0.007 | 0.042326409 | 1.09E-01 | 2   | 26  | 0.0019 | 9606 | Homo sapiens | HSPA8;UBA52                                                                |
| R-HSA-6804756 | Regulation of TP53 Activity through Phosphorylation               | 2  | 95   | 0.007 | 0.043973234 | 1.09E-01 | 2   | 26  | 0.0019 | 9606 | Homo sapiens | UBA52                                                                      |
| R-HSA-9613354 | Lipophagy                                                         | 1  | 12   | 0.001 | 0.0411887   | 1.09E-01 | 5   | 5   | 0.0004 | 9606 | Homo sapiens | HSPA8                                                                      |
| R-HSA-9014325 | TICAM1, TRAF6-dependent induction of TAK1 complex                 | 1  | 13   | 0.001 | 0.04545056  | 1.09E-01 | 5   | 6   | 0.0004 | 9606 | Homo sapiens | UBA52                                                                      |
| R-HSA-1358803 | Downregulation of ERBB2;ERBB3 signaling                           | 1  | 16   | 0.001 | 0.054545191 | 1.09E-01 | 5   | 8   | 0.0006 | 9606 | Homo sapiens | UBA52                                                                      |
| R-HSA-190873  | Gap junction degradation                                          | 1  | 12   | 0.001 | 0.0411887   | 1.09E-01 | 4   | 4   | 0.0003 | 9606 | Homo sapiens | ACTG1                                                                      |
| R-HSA-937042  | IRAK2 mediated activation of TAK1 complex                         | 1  | 12   | 0.001 | 0.0411887   | 1.09E-01 | 4   | 5   | 0.0004 | 9606 | Homo sapiens | UBA52                                                                      |
| R-HSA-9645460 | Alpha-protein kinase 1 signaling pathway                          | 1  | 14   | 0.001 | 0.047889898 | 1.09E-01 | 4   | 10  | 0.0007 | 9606 | Homo sapiens | UBA52                                                                      |
| R-HSA-9634285 | Constitutive Signaling by Overexpressed ERBB2                     | 1  | 16   | 0.001 | 0.054545191 | 1.09E-01 | 4   | 8   | 0.0006 | 9606 | Homo sapiens | HSP90AA1                                                                   |
| R-HSA-5689877 | Josephin domain DUBs                                              | 1  | 13   | 0.001 | 0.04545056  | 1.09E-01 | 3   | 6   | 0.0004 | 9606 | Homo sapiens | UBA52                                                                      |
| R-HSA-196025  | Formation of annular gap junctions                                | 1  | 11   | 0.001 | 0.03782079  | 1.09E-01 | 2   | 2   | 0.0001 | 9606 | Homo sapiens | ACTG1                                                                      |
| R-HSA-1253288 | Downregulation of ERBB4 signaling                                 | 1  | 11   | 0.001 | 0.03782079  | 1.09E-01 | 2   | 5   | 0.0004 | 9606 | Homo sapiens | UBA52                                                                      |
| R-HSA-9013973 | TICAM1-dependent activation of IRF3/IRF7                          | 1  | 14   | 0.001 | 0.047889898 | 1.09E-01 | 2   | 9   | 0.0007 | 9606 | Homo sapiens | UBA52                                                                      |

|               |                                                                    |   |     |       |             |          |    |     |        |      |              |                                         |
|---------------|--------------------------------------------------------------------|---|-----|-------|-------------|----------|----|-----|--------|------|--------------|-----------------------------------------|
| R-HSA-3000484 | Scavenging by Class F Receptors                                    | 1 | 16  | 0.001 | 0.054545191 | 1.09E-01 | 2  | 2   | 0.0001 | 9606 | Homo sapiens | HSP90AA1                                |
| R-HSA-2691232 | Constitutive Signaling by NOTCH1 HD Domain Mutants                 | 1 | 16  | 0.001 | 0.054545191 | 1.09E-01 | 2  | 6   | 0.0004 | 9606 | Homo sapiens | UBA52                                   |
| R-HSA-2691230 | Signaling by NOTCH1 HD Domain Mutants in Cancer                    | 1 | 16  | 0.001 | 0.054545191 | 1.09E-01 | 2  | 6   | 0.0004 | 9606 | Homo sapiens | UBA52                                   |
| R-HSA-1679131 | Trafficking and processing of endosomal TLR                        | 1 | 16  | 0.001 | 0.054545191 | 1.09E-01 | 2  | 7   | 0.0005 | 9606 | Homo sapiens | HSP90B1                                 |
| R-HSA-3785653 | Myoclonic epilepsy of Lafora                                       | 1 | 11  | 0.001 | 0.03782079  | 1.09E-01 | 1  | 2   | 0.0001 | 9606 | Homo sapiens | UBA52                                   |
| R-HSA-9637628 | Modulation by Mtb of host immune system                            | 1 | 11  | 0.001 | 0.03782079  | 1.09E-01 | 1  | 6   | 0.0004 | 9606 | Homo sapiens | UBA52                                   |
| R-HSA-8849469 | PTK6 Regulates RTKs and Their Effectors AKT1 and DOK1              | 1 | 11  | 0.001 | 0.03782079  | 1.09E-01 | 1  | 8   | 0.0006 | 9606 | Homo sapiens | UBA52                                   |
| R-HSA-9664873 | Pexophagy                                                          | 1 | 13  | 0.001 | 0.044545056 | 1.09E-01 | 1  | 13  | 0.0010 | 9606 | Homo sapiens | UBA52                                   |
| R-HSA-8876493 | InIA-mediated entry of Listeria monocytogenes into host cells      | 1 | 14  | 0.001 | 0.047889898 | 1.09E-01 | 1  | 5   | 0.0004 | 9606 | Homo sapiens | UBA52                                   |
| R-HSA-209560  | NF-kB is activated and signals survival                            | 1 | 15  | 0.001 | 0.051223263 | 1.09E-01 | 1  | 4   | 0.0003 | 9606 | Homo sapiens | UBA52                                   |
| R-HSA-937039  | IRAK1 recruits IKK complex                                         | 1 | 16  | 0.001 | 0.054545191 | 1.09E-01 | 1  | 4   | 0.0003 | 9606 | Homo sapiens | UBA52                                   |
| R-HSA-975144  | IRAK1 recruits IKK complex upon TLR7/8 or 9 stimulation            | 1 | 16  | 0.001 | 0.054545191 | 1.09E-01 | 1  | 4   | 0.0003 | 9606 | Homo sapiens | UBA52                                   |
| R-HSA-209543  | p75NTR recruits signalling complexes                               | 1 | 16  | 0.001 | 0.054545191 | 1.09E-01 | 1  | 9   | 0.0007 | 9606 | Homo sapiens | UBA52                                   |
| R-HSA-5653656 | Vesicle-mediated transport                                         | 6 | 827 | 0.058 | 0.068026701 | 1.09E-01 | 42 | 252 | 0.0186 | 9606 | Homo sapiens | HSPA8;HSP90AA1;TUBB;UBA52;ACTG1;HSP90B1 |
| R-HSA-8953854 | Metabolism of RNA                                                  | 6 | 783 | 0.055 | 0.05497913  | 1.09E-01 | 23 | 187 | 0.0138 | 9606 | Homo sapiens | HSPA8;HNRNPA2B1;SRSF3;RPSA;UBA52;RPL6   |
| R-HSA-3700989 | Transcriptional Regulation by TP53                                 | 4 | 487 | 0.034 | 0.09071775  | 1.09E-01 | 14 | 259 | 0.0191 | 9606 | Homo sapiens | PRDX1;UBA52;LRPPRC                      |
| R-HSA-9012999 | RHO GTPase cycle                                                   | 4 | 460 | 0.032 | 0.077236969 | 1.09E-01 | 9  | 91  | 0.0067 | 9606 | Homo sapiens | HSP90AA1;HSP90AB1;JUP;ACTG1             |
| R-HSA-8878171 | Transcriptional regulation by RUNX1                                | 3 | 261 | 0.018 | 0.063566034 | 1.09E-01 | 25 | 132 | 0.0097 | 9606 | Homo sapiens | H2AC19;H4C1;UBA52                       |
| R-HSA-157118  | Signaling by NOTCH                                                 | 3 | 259 | 0.018 | 0.062413425 | 1.09E-01 | 15 | 154 | 0.0113 | 9606 | Homo sapiens | H2AC19;H4C1;UBA52                       |
| R-HSA-5673001 | RAF/MAP kinase cascade                                             | 3 | 322 | 0.023 | 0.10324824  | 1.09E-01 | 15 | 75  | 0.0055 | 9606 | Homo sapiens | NF1;UBA52;ACTG1                         |
| R-HSA-5684996 | MAPK1/MAPK3 signaling                                              | 3 | 329 | 0.023 | 0.108321056 | 1.09E-01 | 15 | 82  | 0.0060 | 9606 | Homo sapiens | NF1;UBA52;ACTG1                         |
| R-HSA-72203   | Processing of Capped Intron-Containing Pre-mRNA                    | 3 | 256 | 0.018 | 0.060703323 | 1.09E-01 | 14 | 32  | 0.0024 | 9606 | Homo sapiens | HSPA8;HNRNPA2B1;SRSF3                   |
| R-HSA-9609646 | HCMV infection                                                     | 3 | 270 | 0.019 | 0.068875456 | 1.09E-01 | 8  | 31  | 0.0023 | 9606 | Homo sapiens | TUBB;H2AC19;H4C1                        |
| R-HSA-5619507 | Activation of HOX genes during differentiation                     | 2 | 116 | 0.008 | 0.062620964 | 1.09E-01 | 31 | 43  | 0.0032 | 9606 | Homo sapiens | H2AC19;H4C1                             |
| R-HSA-5617472 | Activation of anterior HOX genes in hindbrain development during   | 2 | 116 | 0.008 | 0.062620964 | 1.09E-01 | 31 | 43  | 0.0032 | 9606 | Homo sapiens | H2AC19;H4C1                             |
| R-HSA-212165  | Epigenetic regulation of gene expression                           | 2 | 139 | 0.010 | 0.085530318 | 1.09E-01 | 20 | 34  | 0.0025 | 9606 | Homo sapiens | H2AC19;H4C1                             |
| R-HSA-3214847 | HATs acetylate histones                                            | 2 | 110 | 0.008 | 0.057052502 | 1.09E-01 | 10 | 15  | 0.0011 | 9606 | Homo sapiens | H2AC19;H4C1                             |
| R-HSA-5663220 | RHO GTPases Activate Formins                                       | 2 | 149 | 0.010 | 0.096175197 | 1.09E-01 | 9  | 27  | 0.0020 | 9606 | Homo sapiens | TUBB;ACTG1                              |
| R-HSA-1474165 | Reproduction                                                       | 2 | 123 | 0.009 | 0.069341288 | 1.09E-01 | 8  | 24  | 0.0018 | 9606 | Homo sapiens | H2AC19;H4C1                             |
| R-HSA-68875   | Mitotic Prophase                                                   | 2 | 135 | 0.009 | 0.081381357 | 1.09E-01 | 8  | 34  | 0.0025 | 9606 | Homo sapiens | H2AC19;H4C1                             |
| R-HSA-73886   | Chromosome Maintenance                                             | 2 | 138 | 0.010 | 0.084487025 | 1.09E-01 | 8  | 38  | 0.0028 | 9606 | Homo sapiens | H2AC19;H4C1                             |
| R-HSA-157579  | Telomere Maintenance                                               | 2 | 111 | 0.008 | 0.057967835 | 1.09E-01 | 5  | 34  | 0.0025 | 9606 | Homo sapiens | H2AC19;H4C1                             |
| R-HSA-5610787 | Hedgehog 'off' state                                               | 2 | 124 | 0.009 | 0.070320187 | 1.09E-01 | 5  | 32  | 0.0024 | 9606 | Homo sapiens | TUBB;UBA52                              |
| R-HSA-5628897 | TP53 Regulates Metabolic Genes                                     | 2 | 126 | 0.009 | 0.072291692 | 1.09E-01 | 4  | 34  | 0.0025 | 9606 | Homo sapiens | PRDX1;LRPPRC                            |
| R-HSA-1500931 | Cell-Cell communication                                            | 2 | 133 | 0.009 | 0.079331488 | 1.09E-01 | 4  | 60  | 0.0044 | 9606 | Homo sapiens | JUP;ACTG1                               |
| R-HSA-9707564 | Cytoprotection by HMOX1                                            | 2 | 158 | 0.011 | 0.106063517 | 1.09E-01 | 4  | 37  | 0.0027 | 9606 | Homo sapiens | UBA52;LRPPRC                            |
| R-HSA-1912422 | Pre-NOTCH Expression and Processing                                | 2 | 114 | 0.008 | 0.060744602 | 1.09E-01 | 3  | 38  | 0.0028 | 9606 | Homo sapiens | H2AC19;H4C1                             |
| R-HSA-5693567 | HDR through Homologous Recombination (HRR) or Single Strand        | 2 | 124 | 0.009 | 0.070320187 | 1.09E-01 | 3  | 42  | 0.0031 | 9606 | Homo sapiens | H4C1;UBA52                              |
| R-HSA-5693538 | Homology Directed Repair                                           | 2 | 130 | 0.009 | 0.076288356 | 1.09E-01 | 3  | 50  | 0.0037 | 9606 | Homo sapiens | H4C1;UBA52                              |
| R-HSA-163685  | Integration of energy metabolism                                   | 2 | 145 | 0.010 | 0.091872081 | 1.09E-01 | 3  | 62  | 0.0046 | 9606 | Homo sapiens | TALDO1;TKT                              |
| R-HSA-69481   | G2/M Checkpoints                                                   | 2 | 154 | 0.011 | 0.101634541 | 1.09E-01 | 3  | 24  | 0.0018 | 9606 | Homo sapiens | H4C1;UBA52                              |
| R-HSA-381119  | Unfolded Protein Response (UPR)                                    | 2 | 155 | 0.011 | 0.102736768 | 1.09E-01 | 1  | 94  | 0.0069 | 9606 | Homo sapiens | HSP90B1                                 |
| R-HSA-5637812 | Signaling by EGFRvIII in Cancer                                    | 1 | 22  | 0.002 | 0.074238711 | 1.09E-01 | 18 | 18  | 0.0013 | 9606 | Homo sapiens | HSP90AA1                                |
| R-HSA-5637810 | Constitutive Signaling by EGFRvIII                                 | 1 | 22  | 0.002 | 0.074238711 | 1.09E-01 | 18 | 18  | 0.0013 | 9606 | Homo sapiens | HSP90AA1                                |
| R-HSA-8866652 | Synthesis of active ubiquitin: roles of E1 and E2 enzymes          | 1 | 33  | 0.002 | 0.109304777 | 1.09E-01 | 13 | 16  | 0.0012 | 9606 | Homo sapiens | UBA52                                   |
| R-HSA-2173795 | Downregulation of SMAD2/3:SMAD4 transcriptional activity           | 1 | 33  | 0.002 | 0.109304777 | 1.09E-01 | 9  | 25  | 0.0018 | 9606 | Homo sapiens | UBA52                                   |
| R-HSA-2173788 | Downregulation of TGF-beta receptor signaling                      | 1 | 28  | 0.002 | 0.093530059 | 1.09E-01 | 8  | 28  | 0.0021 | 9606 | Homo sapiens | UBA52                                   |
| R-HSA-110320  | Translesion Synthesis by POLH                                      | 1 | 24  | 0.002 | 0.080713446 | 1.09E-01 | 7  | 8   | 0.0006 | 9606 | Homo sapiens | UBA52                                   |
| R-HSA-844456  | The NLRP3 inflammasome                                             | 1 | 24  | 0.002 | 0.080713446 | 1.09E-01 | 7  | 18  | 0.0013 | 9606 | Homo sapiens | HSP90A81                                |
| R-HSA-389977  | Post-chaperonin tubulin folding pathway                            | 1 | 25  | 0.002 | 0.08393415  | 1.09E-01 | 6  | 9   | 0.0007 | 9606 | Homo sapiens | TUBB                                    |
| R-HSA-937072  | TRAF6-mediated induction of TAK1 complex within TLR4 complex       | 1 | 19  | 0.001 | 0.064442732 | 1.09E-01 | 5  | 6   | 0.0004 | 9606 | Homo sapiens | UBA52                                   |
| R-HSA-2122948 | Activated NOTCH1 Transmits Signal to the Nucleus                   | 1 | 32  | 0.002 | 0.106115508 | 1.09E-01 | 5  | 21  | 0.0015 | 9606 | Homo sapiens | UBA52                                   |
| R-HSA-975163  | IRAK2 mediated activation of TAK1 complex upon TLR7/8 or 9 sti     | 1 | 18  | 0.001 | 0.061154887 | 1.09E-01 | 4  | 5   | 0.0004 | 9606 | Homo sapiens | UBA52                                   |
| R-HSA-110312  | Translesion synthesis by REV1                                      | 1 | 19  | 0.001 | 0.064442732 | 1.09E-01 | 4  | 5   | 0.0004 | 9606 | Homo sapiens | UBA52                                   |
| R-HSA-3134975 | Regulation of innate immune responses to cytosolic DNA             | 1 | 21  | 0.001 | 0.070984606 | 1.09E-01 | 4  | 9   | 0.0007 | 9606 | Homo sapiens | UBA52                                   |
| R-HSA-9665348 | Signaling by ERBB2 ECD mutants                                     | 1 | 23  | 0.002 | 0.077481645 | 1.09E-01 | 4  | 15  | 0.0011 | 9606 | Homo sapiens | HSP90AA1                                |
| R-HSA-8876384 | Listeria monocytogenes entry into host cells                       | 1 | 27  | 0.002 | 0.090342419 | 1.09E-01 | 4  | 13  | 0.0010 | 9606 | Homo sapiens | UBA52                                   |
| R-HSA-175474  | Assembly Of The HIV Virion                                         | 1 | 27  | 0.002 | 0.090342419 | 1.09E-01 | 4  | 16  | 0.0012 | 9606 | Homo sapiens | UBA52                                   |
| R-HSA-9665686 | Signaling by ERBB2 TMD/JMD mutants                                 | 1 | 30  | 0.002 | 0.099872532 | 1.09E-01 | 4  | 13  | 0.0010 | 9606 | Homo sapiens | HSP90AA1                                |
| R-HSA-174490  | Membrane binding and targeting of GAG proteins                     | 1 | 17  | 0.001 | 0.057855719 | 1.09E-01 | 3  | 4   | 0.0003 | 9606 | Homo sapiens | UBA52                                   |
| R-HSA-174495  | Synthesis And Processing Of GAG, GAGPOL Polyproteins               | 1 | 18  | 0.001 | 0.061154887 | 1.09E-01 | 3  | 5   | 0.0004 | 9606 | Homo sapiens | UBA52                                   |
| R-HSA-205043  | NRIF signals cell death from the nucleus                           | 1 | 18  | 0.001 | 0.061154887 | 1.09E-01 | 3  | 7   | 0.0005 | 9606 | Homo sapiens | UBA52                                   |
| R-HSA-8875360 | InB-mediated entry of Listeria monocytogenes into host cell        | 1 | 19  | 0.001 | 0.064442732 | 1.09E-01 | 3  | 8   | 0.0006 | 9606 | Homo sapiens | UBA52                                   |
| R-HSA-5656121 | Translesion synthesis by POLI                                      | 1 | 20  | 0.001 | 0.067719293 | 1.09E-01 | 3  | 3   | 0.0002 | 9606 | Homo sapiens | UBA52                                   |
| R-HSA-5655862 | Translesion synthesis by POLK                                      | 1 | 21  | 0.001 | 0.070984606 | 1.09E-01 | 3  | 3   | 0.0002 | 9606 | Homo sapiens | UBA52                                   |
| R-HSA-4641263 | Regulation of FZD by ubiquitination                                | 1 | 22  | 0.002 | 0.074238711 | 1.09E-01 | 3  | 6   | 0.0004 | 9606 | Homo sapiens | UBA52                                   |
| R-HSA-6807004 | Negative regulation of MET activity                                | 1 | 25  | 0.002 | 0.08393415  | 1.09E-01 | 3  | 12  | 0.0009 | 9606 | Homo sapiens | UBA52                                   |
| R-HSA-110314  | Recognition of DNA damage by PCNA-containing replication com       | 1 | 30  | 0.002 | 0.099872532 | 1.09E-01 | 3  | 6   | 0.0004 | 9606 | Homo sapiens | UBA52                                   |
| R-HSA-3214842 | HDMs demethylate histones                                          | 1 | 31  | 0.002 | 0.103027439 | 1.09E-01 | 3  | 17  | 0.0013 | 9606 | Homo sapiens | H4C1                                    |
| R-HSA-5684264 | MAP3K8 (TPL2)-dependent MAPK1/3 activation                         | 1 | 18  | 0.001 | 0.061154887 | 1.09E-01 | 2  | 8   | 0.0006 | 9606 | Homo sapiens | UBA52                                   |
| R-HSA-2173791 | TGF-beta receptor signaling in EMT (epithelial to mesenchymal t    | 1 | 19  | 0.001 | 0.064442732 | 1.09E-01 | 2  | 6   | 0.0004 | 9606 | Homo sapiens | UBA52                                   |
| R-HSA-1295596 | Spry regulation of FGF signaling                                   | 1 | 19  | 0.001 | 0.064442732 | 1.09E-01 | 2  | 11  | 0.0008 | 9606 | Homo sapiens | UBA52                                   |
| R-HSA-193639  | p75NTR signals via NF-kB                                           | 1 | 19  | 0.001 | 0.064442732 | 1.09E-01 | 2  | 13  | 0.0010 | 9606 | Homo sapiens | UBA52                                   |
| R-HSA-936964  | Activation of IRF3/IRF7 mediated by TBK1/IKK epsilon               | 1 | 20  | 0.001 | 0.067719293 | 1.09E-01 | 2  | 9   | 0.0007 | 9606 | Homo sapiens | UBA52                                   |
| R-HSA-2979096 | NOTCH2 Activation and Transmission of Signal to the Nucleus        | 1 | 23  | 0.002 | 0.077481645 | 1.09E-01 | 2  | 11  | 0.0008 | 9606 | Homo sapiens | UBA52                                   |
| R-HSA-174048  | APC/C.Cdc20 mediated degradation of Cyclin B                       | 1 | 24  | 0.002 | 0.080713446 | 1.09E-01 | 2  | 3   | 0.0002 | 9606 | Homo sapiens | UBA52                                   |
| R-HSA-9609523 | Insertion of tail-anchored proteins into the endoplasmic reticulum | 1 | 25  | 0.002 | 0.08393415  | 1.09E-01 | 2  | 7   | 0.0005 | 9606 | Homo sapiens | ANXA4                                   |

|               |                                                                    |   |     |       |             |          |    |     |        |      |              |                   |
|---------------|--------------------------------------------------------------------|---|-----|-------|-------------|----------|----|-----|--------|------|--------------|-------------------|
| R-HSA-179409  | APC-Cdc20 mediated degradation of Nek2A                            | 1 | 26  | 0.002 | 0.087143795 | 1.09E-01 | 2  | 3   | 0.0002 | 9606 | Homo sapiens | UBA52             |
| R-HSA-9636383 | Prevention of phagosomal-lysosomal fusion                          | 1 | 26  | 0.002 | 0.087143795 | 1.09E-01 | 2  | 11  | 0.0008 | 9606 | Homo sapiens | UBA52             |
| R-HSA-3322077 | Glycogen synthesis                                                 | 1 | 26  | 0.002 | 0.087143795 | 1.09E-01 | 2  | 24  | 0.0018 | 9606 | Homo sapiens | UBA52             |
| R-HSA-5696397 | Gap-filling DNA repair synthesis and ligation in GG-NER            | 1 | 27  | 0.002 | 0.090342419 | 1.09E-01 | 2  | 2   | 0.0001 | 9606 | Homo sapiens | UBA52             |
| R-HSA-9013507 | NOTCH3 Activation and Transmission of Signal to the Nucleus        | 1 | 28  | 0.002 | 0.093530059 | 1.09E-01 | 2  | 15  | 0.0011 | 9606 | Homo sapiens | UBA52             |
| R-HSA-9637687 | Suppression of phagosomal maturation                               | 1 | 32  | 0.002 | 0.106171508 | 1.09E-01 | 2  | 17  | 0.0013 | 9606 | Homo sapiens | UBA52             |
| R-HSA-445095  | Interaction between L1 and Ankyrins                                | 1 | 33  | 0.002 | 0.109304777 | 1.09E-01 | 2  | 4   | 0.0003 | 9606 | Homo sapiens | ACTG1             |
| R-HSA-901032  | ER Quality Control Compartment (ERQC)                              | 1 | 33  | 0.002 | 0.109304777 | 1.09E-01 | 2  | 9   | 0.0007 | 9606 | Homo sapiens | UBA52             |
| R-HSA-975110  | TRAF6 mediated IRF7 activation in TLR7/8 or 9 signaling            | 1 | 17  | 0.001 | 0.057855719 | 1.09E-01 | 1  | 5   | 0.0004 | 9606 | Homo sapiens | UBA52             |
| R-HSA-9708530 | Regulation of BACH1 activity                                       | 1 | 18  | 0.001 | 0.061154887 | 1.09E-01 | 1  | 7   | 0.0005 | 9606 | Homo sapiens | UBA52             |
| R-HSA-193144  | Estrogen biosynthesis                                              | 1 | 18  | 0.001 | 0.061154887 | 1.09E-01 | 1  | 7   | 0.0005 | 9606 | Homo sapiens | AKR1B10           |
| R-HSA-168927  | TICAM1, RIP1-mediated IKK complex recruitment                      | 1 | 19  | 0.001 | 0.064442732 | 1.09E-01 | 1  | 3   | 0.0002 | 9606 | Homo sapiens | UBA52             |
| R-HSA-8876725 | Protein methylation                                                | 1 | 19  | 0.001 | 0.064442732 | 1.09E-01 | 1  | 9   | 0.0007 | 9606 | Homo sapiens | HSPA8             |
| R-HSA-446353  | Cell-extracellular matrix interactions                             | 1 | 19  | 0.001 | 0.064442732 | 1.09E-01 | 1  | 10  | 0.0007 | 9606 | Homo sapiens | ACTG1             |
| R-HSA-9706369 | Negative regulation of FLT3                                        | 1 | 20  | 0.001 | 0.067719293 | 1.09E-01 | 1  | 12  | 0.0009 | 9606 | Homo sapiens | UBA52             |
| R-HSA-190840  | Microtubule-dependent trafficking of connexons from Golgi to th    | 1 | 22  | 0.002 | 0.074238711 | 1.09E-01 | 1  | 2   | 0.0001 | 9606 | Homo sapiens | TUBB              |
| R-HSA-5205685 | PINK1-PRKN Mediated Mitophagy                                      | 1 | 22  | 0.002 | 0.074238711 | 1.09E-01 | 1  | 8   | 0.0006 | 9606 | Homo sapiens | UBA52             |
| R-HSA-3229121 | Glycogen storage diseases                                          | 1 | 22  | 0.002 | 0.074238711 | 1.09E-01 | 1  | 10  | 0.0007 | 9606 | Homo sapiens | UBA52             |
| R-HSA-190872  | Transport of connexons to the plasma membrane                      | 1 | 23  | 0.002 | 0.07481645  | 1.09E-01 | 1  | 3   | 0.0002 | 9606 | Homo sapiens | TUBB              |
| R-HSA-6804760 | Regulation of TP53 Activity through Methylation                    | 1 | 23  | 0.002 | 0.07481645  | 1.09E-01 | 1  | 12  | 0.0009 | 9606 | Homo sapiens | UBA52             |
| R-HSA-937041  | IKK complex recruitment mediated by RIP1                           | 1 | 24  | 0.002 | 0.080713446 | 1.09E-01 | 1  | 3   | 0.0002 | 9606 | Homo sapiens | UBA52             |
| R-HSA-912631  | Regulation of signaling by CBL                                     | 1 | 24  | 0.002 | 0.080713446 | 1.09E-01 | 1  | 7   | 0.0005 | 9606 | Homo sapiens | UBA52             |
| R-HSA-450321  | JNK (c-Jun kinases) phosphorylation and activation mediated by ;   | 1 | 26  | 0.002 | 0.087143795 | 1.09E-01 | 1  | 3   | 0.0002 | 9606 | Homo sapiens | UBA52             |
| R-HSA-450302  | activated TAK1 mediates p38 MAPK activation                        | 1 | 27  | 0.002 | 0.090342419 | 1.09E-01 | 1  | 5   | 0.0004 | 9606 | Homo sapiens | UBA52             |
| R-HSA-9705462 | Inactivation of CSF3 (G-CSF) signaling                             | 1 | 27  | 0.002 | 0.090342419 | 1.09E-01 | 1  | 9   | 0.0007 | 9606 | Homo sapiens | UBA52             |
| R-HSA-5357956 | TNFR1-induced NFkappaB signaling pathway                           | 1 | 30  | 0.002 | 0.099872532 | 1.09E-01 | 1  | 5   | 0.0004 | 9606 | Homo sapiens | UBA52             |
| R-HSA-8862803 | Deregulated CDKS triggers multiple neurodegenerative pathways      | 1 | 30  | 0.002 | 0.099872532 | 1.09E-01 | 1  | 22  | 0.0016 | 9606 | Homo sapiens | PRDX1             |
| R-HSA-8863678 | Neurodegenerative Diseases                                         | 1 | 30  | 0.002 | 0.099872532 | 1.09E-01 | 1  | 22  | 0.0016 | 9606 | Homo sapiens | PRDX1             |
| R-HSA-5205647 | Mitophagy                                                          | 1 | 31  | 0.002 | 0.103027439 | 1.09E-01 | 1  | 15  | 0.0011 | 9606 | Homo sapiens | UBA52             |
| R-HSA-5601884 | PWI-interacting RNA (piRNA) biogenesis                             | 1 | 31  | 0.002 | 0.103027439 | 1.09E-01 | 1  | 15  | 0.0011 | 9606 | Homo sapiens | HSP90AA1          |
| R-HSA-9734009 | Defective intrinsic Pathway for Apoptosis                          | 1 | 33  | 0.002 | 0.109304777 | 1.09E-01 | 1  | 24  | 0.0018 | 9606 | Homo sapiens | PRDX1             |
| R-HSA-195721  | Signaling by WNT                                                   | 3 | 332 | 0.023 | 0.110525007 | 1.11E-01 | 19 | 157 | 0.0116 | 9606 | Homo sapiens | H2AC19;H4C1;UBA52 |
| R-HSA-622312  | Inflammasomes                                                      | 1 | 34  | 0.002 | 0.112427281 | 1.12E-01 | 17 | 28  | 0.0021 | 9606 | Homo sapiens | HSP90AB1          |
| R-HSA-5654732 | Negative regulation of FGFR3 signaling                             | 1 | 34  | 0.002 | 0.112427281 | 1.12E-01 | 1  | 14  | 0.0010 | 9606 | Homo sapiens | UBA52             |
| R-HSA-9619483 | Activation of AMPK downstream of NMDARs                            | 1 | 34  | 0.002 | 0.112427281 | 1.12E-01 | 3  | 3   | 0.0002 | 9606 | Homo sapiens | TUBB              |
| R-HSA-162599  | Late Phase of HIV Life Cycle                                       | 2 | 164 | 0.011 | 0.112804131 | 1.13E-01 | 18 | 78  | 0.0057 | 9606 | Homo sapiens | UBA52             |
| R-HSA-5656169 | Termination of translesion DNA synthesis                           | 1 | 35  | 0.002 | 0.115539057 | 1.16E-01 | 6  | 9   | 0.0007 | 9606 | Homo sapiens | UBA52             |
| R-HSA-917729  | Endosomal Sorting Complex Required For Transport (ESCRT)           | 1 | 35  | 0.002 | 0.115539057 | 1.16E-01 | 4  | 4   | 0.0003 | 9606 | Homo sapiens | UBA52             |
| R-HSA-9664565 | Signaling by ERBB2 KD Mutants                                      | 1 | 35  | 0.002 | 0.115539057 | 1.16E-01 | 4  | 17  | 0.0013 | 9606 | Homo sapiens | HSP90AA1          |
| R-HSA-5654733 | Negative regulation of FGFR4 signaling                             | 1 | 35  | 0.002 | 0.115539057 | 1.16E-01 | 3  | 14  | 0.0010 | 9606 | Homo sapiens | UBA52             |
| R-HSA-9674555 | Signaling by CSF3 (G-CSF)                                          | 1 | 35  | 0.002 | 0.115539057 | 1.16E-01 | 1  | 21  | 0.0015 | 9606 | Homo sapiens | UBA52             |
| R-HSA-5693532 | DNA Double-Strand Break Repair                                     | 2 | 168 | 0.012 | 0.117359395 | 1.17E-01 | 37 | 111 | 0.0082 | 9606 | Homo sapiens | H4C1;UBA52        |
| R-HSA-5358351 | Signaling by Hedgehog                                              | 2 | 168 | 0.012 | 0.117359395 | 1.17E-01 | 12 | 82  | 0.0060 | 9606 | Homo sapiens | TUBB;UBA52        |
| R-HSA-2173782 | Binding and Uptake of Ligands by Scavenger Receptors               | 2 | 168 | 0.012 | 0.117359395 | 1.17E-01 | 4  | 33  | 0.0024 | 9606 | Homo sapiens | HSP90AA1;HSP90B1  |
| R-HSA-1227990 | Signaling by ERBB2 in Cancer                                       | 1 | 36  | 0.003 | 0.118640141 | 1.19E-01 | 25 | 62  | 0.0046 | 9606 | Homo sapiens | HSP90AA1          |
| R-HSA-2173789 | TGF-beta receptor signaling activates SMADs                        | 1 | 36  | 0.003 | 0.118640141 | 1.19E-01 | 8  | 39  | 0.0029 | 9606 | Homo sapiens | UBA52             |
| R-HSA-9609507 | Protein localization                                               | 2 | 170 | 0.012 | 0.119654669 | 1.20E-01 | 14 | 53  | 0.0039 | 9606 | Homo sapiens | ANXA4;UBA52       |
| R-HSA-203615  | eNOS activation                                                    | 1 | 37  | 0.003 | 0.121730568 | 1.22E-01 | 8  | 20  | 0.0015 | 9606 | Homo sapiens | HSP90AA1          |
| R-HSA-182971  | EGFR downregulation                                                | 1 | 37  | 0.003 | 0.121730568 | 1.22E-01 | 6  | 22  | 0.0016 | 9606 | Homo sapiens | UBA52             |
| R-HSA-936440  | Negative regulators of DDX58/IFIH1 signaling                       | 1 | 37  | 0.003 | 0.121730568 | 1.22E-01 | 4  | 13  | 0.0010 | 9606 | Homo sapiens | UBA52             |
| R-HSA-162588  | Budding and maturation of HIV virion                               | 1 | 37  | 0.003 | 0.121730568 | 1.22E-01 | 2  | 4   | 0.0003 | 9606 | Homo sapiens | UBA52             |
| R-HSA-888590  | GABA synthesis, release, reuptake and degradation                  | 1 | 37  | 0.003 | 0.121730568 | 1.22E-01 | 2  | 10  | 0.0007 | 9606 | Homo sapiens | HSPA8             |
| R-HSA-1474151 | Tetrahydrobiopterin (BH4) synthesis, recycling, salvage and regul. | 1 | 37  | 0.003 | 0.121730568 | 1.22E-01 | 2  | 16  | 0.0012 | 9606 | Homo sapiens | HSP90AA1          |
| R-HSA-2173796 | SMAD2/SMAD3:SMAD4 heterotrimer regulates transcription             | 1 | 38  | 0.003 | 0.124810375 | 1.25E-01 | 2  | 19  | 0.0014 | 9606 | Homo sapiens | UBA52             |
| R-HSA-1980145 | Signaling by NOTCH2                                                | 1 | 38  | 0.003 | 0.124810375 | 1.25E-01 | 2  | 20  | 0.0015 | 9606 | Homo sapiens | UBA52             |
| R-HSA-9013407 | RHOH GTPase cycle                                                  | 1 | 38  | 0.003 | 0.124810375 | 1.25E-01 | 1  | 3   | 0.0002 | 9606 | Homo sapiens | JUP               |
| R-HSA-9610379 | HCMV Late Events                                                   | 2 | 175 | 0.012 | 0.125442179 | 1.25E-01 | 1  | 19  | 0.0014 | 9606 | Homo sapiens | H2AC19;H4C1       |
| R-HSA-5654726 | Negative regulation of FGFR1 signaling                             | 1 | 39  | 0.003 | 0.127879597 | 1.28E-01 | 3  | 15  | 0.0011 | 9606 | Homo sapiens | UBA52             |
| R-HSA-445989  | TAK1 activates NFkB by phosphorylation and activation of IKKs co   | 1 | 39  | 0.003 | 0.127879597 | 1.28E-01 | 1  | 5   | 0.0004 | 9606 | Homo sapiens | UBA52             |
| R-HSA-9668328 | Sealing of the nuclear envelope (NE) by ESCRT-III                  | 1 | 39  | 0.003 | 0.127879597 | 1.28E-01 | 1  | 7   | 0.0005 | 9606 | Homo sapiens | TUBB              |
| R-HSA-5633007 | Regulation of TP53 Activity                                        | 2 | 178 | 0.012 | 0.128947209 | 1.29E-01 | 10 | 98  | 0.0072 | 9606 | Homo sapiens | UBA52             |
| R-HSA-162587  | HIV Life Cycle                                                     | 2 | 179 | 0.013 | 0.13012078  | 1.30E-01 | 18 | 117 | 0.0086 | 9606 | Homo sapiens | UBA52             |
| R-HSA-168638  | NOD1/2 Signaling Pathway                                           | 1 | 40  | 0.003 | 0.13093827  | 1.31E-01 | 7  | 18  | 0.0013 | 9606 | Homo sapiens | UBA52             |
| R-HSA-5696394 | DNA Damage Recognition in GG-NER                                   | 1 | 40  | 0.003 | 0.13093827  | 1.31E-01 | 3  | 5   | 0.0004 | 9606 | Homo sapiens | UBA52             |
| R-HSA-202131  | Metabolism of nitric oxide: NOS3 activation and regulation         | 1 | 41  | 0.003 | 0.13398643  | 1.34E-01 | 8  | 26  | 0.0019 | 9606 | Homo sapiens | HSP90AA1          |
| R-HSA-5663213 | RHO GTPases Activate WASPs and WAVES                               | 1 | 41  | 0.003 | 0.13398643  | 1.34E-01 | 4  | 10  | 0.0007 | 9606 | Homo sapiens | ACTG1             |
| R-HSA-5654727 | Negative regulation of FGFR2 signaling                             | 1 | 41  | 0.003 | 0.13398643  | 1.34E-01 | 3  | 14  | 0.0010 | 9606 | Homo sapiens | UBA52             |
| R-HSA-190861  | Gap junction assembly                                              | 1 | 41  | 0.003 | 0.13398643  | 1.34E-01 | 3  | 16  | 0.0012 | 9606 | Homo sapiens | TUBB              |
| R-HSA-5696400 | Dual Incision in GG-NER                                            | 1 | 41  | 0.003 | 0.13398643  | 1.34E-01 | 2  | 3   | 0.0002 | 9606 | Homo sapiens | UBA52             |
| R-HSA-901042  | Calnexin/calreticulin cycle                                        | 1 | 41  | 0.003 | 0.13398643  | 1.34E-01 | 2  | 13  | 0.0010 | 9606 | Homo sapiens | UBA52             |
| R-HSA-5357905 | Regulation of TNFR1 signaling                                      | 1 | 41  | 0.003 | 0.13398643  | 1.34E-01 | 2  | 17  | 0.0013 | 9606 | Homo sapiens | UBA52             |
| R-HSA-2559585 | Oncogene Induced Senescence                                        | 1 | 42  | 0.003 | 0.137024112 | 1.37E-01 | 1  | 19  | 0.0014 | 9606 | Homo sapiens | UBA52             |
| R-HSA-6804757 | Regulation of TP53 Degradation                                     | 1 | 43  | 0.003 | 0.140051351 | 1.40E-01 | 7  | 30  | 0.0022 | 9606 | Homo sapiens | UBA52             |
| R-HSA-8982491 | Glycogen metabolism                                                | 1 | 43  | 0.003 | 0.140051351 | 1.40E-01 | 2  | 39  | 0.0029 | 9606 | Homo sapiens | UBA52             |
| R-HSA-432720  | Lysosome Vesicle Biogenesis                                        | 1 | 43  | 0.003 | 0.140051351 | 1.40E-01 | 1  | 8   | 0.0006 | 9606 | Homo sapiens | HSPA8             |
| R-HSA-9682385 | FLT3 signaling in disease                                          | 1 | 43  | 0.003 | 0.140051351 | 1.40E-01 | 1  | 52  | 0.0038 | 9606 | Homo sapiens | UBA52             |
| R-HSA-168898  | Toll-like Receptor Cascades                                        | 2 | 188 | 0.013 | 0.140794485 | 1.41E-01 | 33 | 185 | 0.0136 | 9606 | Homo sapiens | UBA52;HSP90B1     |

|               |                                                                  |   |     |       |             |          |     |     |        |      |              |                          |
|---------------|------------------------------------------------------------------|---|-----|-------|-------------|----------|-----|-----|--------|------|--------------|--------------------------|
| R-HSA-5689896 | Ovarian tumor domain proteases                                   | 1 | 44  | 0.003 | 0.143068182 | 1.43E-01 | 7   | 14  | 0.0010 | 9606 | Homo sapiens | UBA52                    |
| R-HSA-6802948 | Signaling by high-kinase activity BRAF mutants                   | 1 | 44  | 0.003 | 0.143068182 | 1.43E-01 | 4   | 6   | 0.0004 | 9606 | Homo sapiens | ACTG1                    |
| R-HSA-419037  | NCAM1 interactions                                               | 1 | 44  | 0.003 | 0.143068182 | 1.43E-01 | 1   | 10  | 0.0007 | 9606 | Homo sapiens | ANXA4                    |
| R-HSA-3769402 | Deactivation of the beta-catenin transactivating complex         | 1 | 44  | 0.003 | 0.143068182 | 1.43E-01 | 1   | 14  | 0.0010 | 9606 | Homo sapiens | UBA52                    |
| R-HSA-73894   | DNA Repair                                                       | 3 | 380 | 0.027 | 0.148026671 | 1.48E-01 | 102 | 337 | 0.0248 | 9606 | Homo sapiens | H2AC19;H4C1;UBA52        |
| R-HSA-5683057 | MAPK family signaling cascades                                   | 3 | 380 | 0.027 | 0.148026671 | 1.48E-01 | 17  | 122 | 0.0090 | 9606 | Homo sapiens | NF1;UBA52;ACTG1          |
| R-HSA-6806003 | Regulation of TP53 Expression and Degradation                    | 1 | 46  | 0.003 | 0.149070762 | 1.49E-01 | 7   | 35  | 0.0026 | 9606 | Homo sapiens | UBA52                    |
| R-HSA-9648002 | RAS processing                                                   | 1 | 46  | 0.003 | 0.149070762 | 1.49E-01 | 1   | 21  | 0.0015 | 9606 | Homo sapiens | UBA52                    |
| R-HSA-2467813 | Separation of Sister Chromatids                                  | 2 | 195 | 0.014 | 0.149225469 | 1.49E-01 | 4   | 8   | 0.0006 | 9606 | Homo sapiens | TUBB;UBA52               |
| R-HSA-5696395 | Formation of Incision Complex in GG-NER                          | 1 | 47  | 0.003 | 0.15205658  | 1.52E-01 | 7   | 10  | 0.0007 | 9606 | Homo sapiens | UBA52                    |
| R-HSA-73779   | RNA Polymerase II Transcription Pre-Initiation And Promoter Ope  | 1 | 47  | 0.003 | 0.15205658  | 1.52E-01 | 5   | 5   | 0.0004 | 9606 | Homo sapiens | UBA52                    |
| R-HSA-110313  | Translesion synthesis by Y family DNA polymerases bypasses lesi  | 1 | 48  | 0.003 | 0.15503213  | 1.55E-01 | 23  | 28  | 0.0021 | 9606 | Homo sapiens | UBA52                    |
| R-HSA-9607240 | FLT3 Signaling                                                   | 1 | 48  | 0.003 | 0.15503213  | 1.55E-01 | 1   | 43  | 0.0032 | 9606 | Homo sapiens | UBA52                    |
| R-HSA-5674135 | MAP2K and MAPK activation                                        | 1 | 49  | 0.003 | 0.157997447 | 1.58E-01 | 8   | 12  | 0.0009 | 9606 | Homo sapiens | ACTG1                    |
| R-HSA-9656223 | Signaling by RAF1 mutants                                        | 1 | 49  | 0.003 | 0.157997447 | 1.58E-01 | 4   | 7   | 0.0005 | 9606 | Homo sapiens | ACTG1                    |
| R-HSA-3214841 | PKMTs methylate histone lysines                                  | 1 | 49  | 0.003 | 0.157997447 | 1.58E-01 | 3   | 22  | 0.0016 | 9606 | Homo sapiens | H4C1                     |
| R-HSA-3000480 | Scavenging by Class A Receptors                                  | 1 | 49  | 0.003 | 0.157997447 | 1.58E-01 | 2   | 10  | 0.0007 | 9606 | Homo sapiens | HSP90B1                  |
| R-HSA-9609736 | Assembly and cell surface presentation of NMDA receptors         | 1 | 49  | 0.003 | 0.157997447 | 1.58E-01 | 2   | 23  | 0.0017 | 9606 | Homo sapiens | TUBB                     |
| R-HSA-5675221 | Negative regulation of MAPK pathway                              | 1 | 49  | 0.003 | 0.157997447 | 1.58E-01 | 1   | 17  | 0.0013 | 9606 | Homo sapiens | UBA52                    |
| R-HSA-9683701 | Translation of Structural Proteins                               | 1 | 49  | 0.003 | 0.157997447 | 1.58E-01 | 1   | 37  | 0.0027 | 9606 | Homo sapiens | UBA52                    |
| R-HSA-211733  | Regulation of activated PAK-2p34 by proteasome mediated degr     | 1 | 50  | 0.004 | 0.160952565 | 1.61E-01 | 2   | 2   | 0.0001 | 9606 | Homo sapiens | UBA52                    |
| R-HSA-379716  | Cytosolic tRNA aminoacylation                                    | 1 | 50  | 0.004 | 0.160952565 | 1.61E-01 | 1   | 21  | 0.0015 | 9606 | Homo sapiens | TARS1                    |
| R-HSA-512988  | Interleukin-3, Interleukin-5 and GM-CSF signaling                | 1 | 50  | 0.004 | 0.160952565 | 1.61E-01 | 1   | 38  | 0.0028 | 9606 | Homo sapiens | UBA52                    |
| R-HSA-5689880 | Ub-specific processing proteases                                 | 2 | 206 | 0.014 | 0.16267666  | 1.63E-01 | 36  | 40  | 0.0029 | 9606 | Homo sapiens | H2AC19;UBA52             |
| R-HSA-75893   | TNF signaling                                                    | 1 | 51  | 0.004 | 0.163897518 | 1.64E-01 | 3   | 32  | 0.0024 | 9606 | Homo sapiens | UBA52                    |
| R-HSA-5654743 | Signaling by FGFR4                                               | 1 | 51  | 0.004 | 0.163897518 | 1.64E-01 | 3   | 41  | 0.0030 | 9606 | Homo sapiens | UBA52                    |
| R-HSA-9637690 | Response of Mtb to phagocytosis                                  | 1 | 51  | 0.004 | 0.163897518 | 1.64E-01 | 2   | 30  | 0.0022 | 9606 | Homo sapiens | UBA52                    |
| R-HSA-69231   | Cyclin D associated events in G1                                 | 1 | 51  | 0.004 | 0.163897518 | 1.64E-01 | 1   | 15  | 0.0011 | 9606 | Homo sapiens | UBA52                    |
| R-HSA-69236   | G1 Phase                                                         | 1 | 51  | 0.004 | 0.163897518 | 1.64E-01 | 1   | 15  | 0.0011 | 9606 | Homo sapiens | UBA52                    |
| R-HSA-167162  | RNA Polymerase II HIV Promoter Escape                            | 1 | 52  | 0.004 | 0.166832341 | 1.67E-01 | 6   | 9   | 0.0007 | 9606 | Homo sapiens | UBA52                    |
| R-HSA-167161  | HIV Transcription Initiation                                     | 1 | 52  | 0.004 | 0.166832341 | 1.67E-01 | 4   | 4   | 0.0003 | 9606 | Homo sapiens | UBA52                    |
| R-HSA-75953   | RNA Polymerase II Transcription Initiation                       | 1 | 52  | 0.004 | 0.166832341 | 1.67E-01 | 3   | 3   | 0.0002 | 9606 | Homo sapiens | UBA52                    |
| R-HSA-3928662 | EPHB-mediated forward signaling                                  | 1 | 52  | 0.004 | 0.166832341 | 1.67E-01 | 1   | 26  | 0.0019 | 9606 | Homo sapiens | ACTG1                    |
| R-HSA-6783310 | Fanconi Anemia Pathway                                           | 1 | 53  | 0.004 | 0.169757067 | 1.70E-01 | 6   | 15  | 0.0011 | 9606 | Homo sapiens | UBA52                    |
| R-HSA-73776   | RNA Polymerase II Promoter Escape                                | 1 | 53  | 0.004 | 0.169757067 | 1.70E-01 | 5   | 7   | 0.0005 | 9606 | Homo sapiens | UBA52                    |
| R-HSA-5654741 | Signaling by FGFR3                                               | 1 | 53  | 0.004 | 0.169757067 | 1.70E-01 | 3   | 43  | 0.0032 | 9606 | Homo sapiens | UBA52                    |
| R-HSA-180534  | Vpu mediated degradation of CD4                                  | 1 | 53  | 0.004 | 0.169757067 | 1.70E-01 | 2   | 5   | 0.0004 | 9606 | Homo sapiens | UBA52                    |
| R-HSA-9006934 | Signaling by Receptor Tyrosine Kinases                           | 4 | 618 | 0.043 | 0.170191808 | 1.70E-01 | 48  | 746 | 0.0549 | 9606 | Homo sapiens | HSP90AA1;JUP;UBA52;ACTG1 |
| R-HSA-9660826 | Purinergic signaling in leishmaniasis infection                  | 1 | 54  | 0.004 | 0.172671731 | 1.73E-01 | 5   | 23  | 0.0017 | 9606 | Homo sapiens | HSP90AB1                 |
| R-HSA-9664424 | Cell recruitment (pro-inflammatory response)                     | 1 | 54  | 0.004 | 0.172671731 | 1.73E-01 | 5   | 23  | 0.0017 | 9606 | Homo sapiens | HSP90AB1                 |
| R-HSA-9649948 | Signaling downstream of RAS mutants                              | 1 | 54  | 0.004 | 0.172671731 | 1.73E-01 | 4   | 7   | 0.0005 | 9606 | Homo sapiens | ACTG1                    |
| R-HSA-6802946 | Signaling by moderate kinase activity BRAF mutants               | 1 | 54  | 0.004 | 0.172671731 | 1.73E-01 | 4   | 7   | 0.0005 | 9606 | Homo sapiens | ACTG1                    |
| R-HSA-6802955 | Paradoxical activation of RAF signaling by kinase inactive BRAF  | 1 | 54  | 0.004 | 0.172671731 | 1.73E-01 | 4   | 7   | 0.0005 | 9606 | Homo sapiens | ACTG1                    |
| R-HSA-6802949 | Signaling by RAS mutants                                         | 1 | 54  | 0.004 | 0.172671731 | 1.73E-01 | 4   | 9   | 0.0007 | 9606 | Homo sapiens | ACTG1                    |
| R-HSA-69613   | p53-independent G1/S DNA damage checkpoint                       | 1 | 54  | 0.004 | 0.172671731 | 1.73E-01 | 2   | 4   | 0.0003 | 9606 | Homo sapiens | UBA52                    |
| R-HSA-69601   | Ubiquitin Mediated Degradation of Phosphorylated Cdc25A          | 1 | 54  | 0.004 | 0.172671731 | 1.73E-01 | 2   | 4   | 0.0003 | 9606 | Homo sapiens | UBA52                    |
| R-HSA-69610   | p53-independent DNA Damage Response                              | 1 | 54  | 0.004 | 0.172671731 | 1.73E-01 | 2   | 4   | 0.0003 | 9606 | Homo sapiens | UBA52                    |
| R-HSA-349425  | Autodegradation of the E3 ubiquitin ligase COP1                  | 1 | 54  | 0.004 | 0.172671731 | 1.73E-01 | 2   | 5   | 0.0004 | 9606 | Homo sapiens | UBA52                    |
| R-HSA-75815   | Ubiquitin-dependent degradation of Cyclin D                      | 1 | 54  | 0.004 | 0.172671731 | 1.73E-01 | 2   | 5   | 0.0004 | 9606 | Homo sapiens | UBA52                    |
| R-HSA-169911  | Regulation of Apoptosis                                          | 1 | 54  | 0.004 | 0.172671731 | 1.73E-01 | 2   | 5   | 0.0004 | 9606 | Homo sapiens | UBA52                    |
| R-HSA-72695   | Formation of the ternary complex, and subsequently, the 43S con  | 1 | 54  | 0.004 | 0.172671731 | 1.73E-01 | 1   | 3   | 0.0002 | 9606 | Homo sapiens | RPSA                     |
| R-HSA-76042   | RNA Polymerase II Transcription Initiation And Promoter Clearanc | 1 | 55  | 0.004 | 0.175576367 | 1.76E-01 | 9   | 11  | 0.0008 | 9606 | Homo sapiens | UBA52                    |
| R-HSA-8955332 | Carboxyterminal post-translational modifications of tubulin      | 1 | 55  | 0.004 | 0.175576367 | 1.76E-01 | 6   | 6   | 0.0004 | 9606 | Homo sapiens | TUBB                     |
| R-HSA-8854050 | FBXL7 down-regulates AURKA during mitotic entry and in early m   | 1 | 55  | 0.004 | 0.175576367 | 1.76E-01 | 4   | 6   | 0.0004 | 9606 | Homo sapiens | UBA52                    |
| R-HSA-174113  | SCF-beta-TrCP mediated degradation of Em1                        | 1 | 55  | 0.004 | 0.175576367 | 1.76E-01 | 2   | 3   | 0.0002 | 9606 | Homo sapiens | UBA52                    |
| R-HSA-3928665 | EPH-ephrin mediated repulsion of cells                           | 1 | 55  | 0.004 | 0.175576367 | 1.76E-01 | 1   | 9   | 0.0007 | 9606 | Homo sapiens | ACTG1                    |
| R-HSA-5620924 | Intraflagellar transport                                         | 1 | 56  | 0.004 | 0.178471008 | 1.78E-01 | 6   | 12  | 0.0009 | 9606 | Homo sapiens | TUBB                     |
| R-HSA-6781823 | Formation of TC-NER Pre-Incision Complex                         | 1 | 56  | 0.004 | 0.178471008 | 1.78E-01 | 3   | 7   | 0.0005 | 9606 | Homo sapiens | UBA52                    |
| R-HSA-180585  | Vif-mediated degradation of APOBEC3G                             | 1 | 56  | 0.004 | 0.178471008 | 1.78E-01 | 2   | 4   | 0.0003 | 9606 | Homo sapiens | UBA52                    |
| R-HSA-73893   | DNA Damage Bypass                                                | 1 | 57  | 0.004 | 0.181355689 | 1.81E-01 | 26  | 34  | 0.0025 | 9606 | Homo sapiens | UBA52                    |
| R-HSA-2173793 | Transcriptional activity of SMAD2/SMAD3:SMAD4 heterotrimer       | 1 | 57  | 0.004 | 0.181355689 | 1.81E-01 | 11  | 44  | 0.0032 | 9606 | Homo sapiens | UBA52                    |
| R-HSA-4641258 | Degradation of DVL                                               | 1 | 57  | 0.004 | 0.181355689 | 1.81E-01 | 4   | 7   | 0.0005 | 9606 | Homo sapiens | UBA52                    |
| R-HSA-4641257 | Degradation of AXIN                                              | 1 | 57  | 0.004 | 0.181355689 | 1.81E-01 | 4   | 8   | 0.0006 | 9606 | Homo sapiens | UBA52                    |
| R-HSA-5693571 | Nonhomologous End-Joining (NHEJ)                                 | 1 | 57  | 0.004 | 0.181355689 | 1.81E-01 | 4   | 13  | 0.0010 | 9606 | Homo sapiens | H4C1                     |
| R-HSA-532668  | N-glycan trimming in the ER and Calnexin/Calreticulin cycle      | 1 | 57  | 0.004 | 0.181355689 | 1.81E-01 | 4   | 18  | 0.0013 | 9606 | Homo sapiens | UBA52                    |
| R-HSA-8941858 | Regulation of RUNX3 expression and activity                      | 1 | 57  | 0.004 | 0.181355689 | 1.81E-01 | 3   | 9   | 0.0007 | 9606 | Homo sapiens | UBA52                    |
| R-HSA-9604323 | Negative regulation of NOTCH4 signaling                          | 1 | 57  | 0.004 | 0.181355689 | 1.81E-01 | 2   | 6   | 0.0004 | 9606 | Homo sapiens | UBA52                    |
| R-HSA-2122947 | NOTCH1 Intracellular Domain Regulates Transcription              | 1 | 57  | 0.004 | 0.181355689 | 1.81E-01 | 1   | 18  | 0.0013 | 9606 | Homo sapiens | UBA52                    |
| R-HSA-72187   | mRNA 3'-end processing                                           | 1 | 58  | 0.004 | 0.184230442 | 1.84E-01 | 3   | 3   | 0.0002 | 9606 | Homo sapiens | SRSF3                    |
| R-HSA-69541   | Stabilization of p53                                             | 1 | 59  | 0.004 | 0.187095301 | 1.87E-01 | 4   | 15  | 0.0011 | 9606 | Homo sapiens | UBA52                    |
| R-HSA-68827   | CDT1 association with the CDC6:ORC:origin complex                | 1 | 59  | 0.004 | 0.187095301 | 1.87E-01 | 2   | 3   | 0.0002 | 9606 | Homo sapiens | UBA52                    |
| R-HSA-9013409 | RHO1 GTPase cycle                                                | 1 | 59  | 0.004 | 0.187095301 | 1.87E-01 | 1   | 3   | 0.0002 | 9606 | Homo sapiens | JUP                      |
| R-HSA-8932339 | ROS sensing by NFE2L2                                            | 1 | 60  | 0.004 | 0.18995503  | 1.90E-01 | 2   | 8   | 0.0006 | 9606 | Homo sapiens | UBA52                    |
| R-HSA-8866654 | E3 ubiquitin ligases ubiquitinate target proteins                | 1 | 61  | 0.004 | 0.192795472 | 1.93E-01 | 16  | 16  | 0.0012 | 9606 | Homo sapiens | UBA52                    |
| R-HSA-177929  | Signaling by EGFR                                                | 1 | 61  | 0.004 | 0.192795472 | 1.93E-01 | 6   | 49  | 0.0036 | 9606 | Homo sapiens | UBA52                    |
| R-HSA-5362768 | Hh mutants are degraded by ERAD                                  | 1 | 61  | 0.004 | 0.192795472 | 1.93E-01 | 2   | 6   | 0.0004 | 9606 | Homo sapiens | UBA52                    |
| R-HSA-5676590 | NIK-->noncanonical NF-kB signaling                               | 1 | 61  | 0.004 | 0.192795472 | 1.93E-01 | 2   | 9   | 0.0007 | 9606 | Homo sapiens | UBA52                    |

|               |                                                                   |   |     |       |             |          |    |     |        |                   |                        |
|---------------|-------------------------------------------------------------------|---|-----|-------|-------------|----------|----|-----|--------|-------------------|------------------------|
| R-HSA-432722  | Golgi Associated Vesicle Biogenesis                               | 1 | 61  | 0.004 | 0.192795472 | 1.93E-01 | 1  | 7   | 0.0005 | 9606 Homo sapiens | HSPA8                  |
| R-HSA-3000171 | Non-integrin membrane-ECM interactions                            | 1 | 61  | 0.004 | 0.192795472 | 1.93E-01 | 1  | 22  | 0.0016 | 9606 Homo sapiens | TKT                    |
| R-HSA-5654736 | Signaling by FGF1                                                 | 1 | 62  | 0.004 | 0.19563085  | 1.96E-01 | 3  | 48  | 0.0035 | 9606 Homo sapiens | UBA52                  |
| R-HSA-72649   | Translation initiation complex formation                          | 1 | 62  | 0.004 | 0.19563085  | 1.96E-01 | 2  | 2   | 0.0001 | 9606 Homo sapiens | RP5A                   |
| R-HSA-187577  | SCF(Skp2)-mediated degradation of p27/p21                         | 1 | 62  | 0.004 | 0.19563085  | 1.96E-01 | 2  | 7   | 0.0005 | 9606 Homo sapiens | UBA52                  |
| R-HSA-4551638 | SUMOylation of chromatin organization proteins                    | 1 | 62  | 0.004 | 0.19563085  | 1.96E-01 | 2  | 15  | 0.0011 | 9606 Homo sapiens | H4C1                   |
| R-HSA-5610785 | GLI3 is processed to GLI3R by the proteasome                      | 1 | 62  | 0.004 | 0.19563085  | 1.96E-01 | 1  | 5   | 0.0004 | 9606 Homo sapiens | UBA52                  |
| R-HSA-5610783 | Degradation of GLI2 by the proteasome                             | 1 | 62  | 0.004 | 0.19563085  | 1.96E-01 | 1  | 5   | 0.0004 | 9606 Homo sapiens | UBA52                  |
| R-HSA-5610780 | Degradation of GLI1 by the proteasome                             | 1 | 62  | 0.004 | 0.19563085  | 1.96E-01 | 1  | 6   | 0.0004 | 9606 Homo sapiens | UBA52                  |
| R-HSA-6811436 | COPI-independent Golgi-to-ER retrograde traffic                   | 1 | 63  | 0.004 | 0.198456467 | 1.98E-01 | 2  | 7   | 0.0005 | 9606 Homo sapiens | TUBB                   |
| R-HSA-9012852 | Signaling by NOTCH3                                               | 1 | 63  | 0.004 | 0.198456467 | 1.98E-01 | 2  | 37  | 0.0027 | 9606 Homo sapiens | UBA52                  |
| R-HSA-9013406 | RHOQ GTPase cycle                                                 | 1 | 63  | 0.004 | 0.198456467 | 1.98E-01 | 1  | 5   | 0.0004 | 9606 Homo sapiens | JUP                    |
| R-HSA-72702   | Ribosomal scanning and start codon recognition                    | 1 | 64  | 0.004 | 0.201272355 | 2.01E-01 | 2  | 2   | 0.0001 | 9606 Homo sapiens | RP5A                   |
| R-HSA-174084  | Autodegradation of Cdh1 by Cdh1:APC/C                             | 1 | 64  | 0.004 | 0.201272355 | 2.01E-01 | 2  | 2   | 0.0001 | 9606 Homo sapiens | UBA52                  |
| R-HSA-5387390 | Hh mutants abrogate ligand secretion                              | 1 | 64  | 0.004 | 0.201272355 | 2.01E-01 | 2  | 7   | 0.0005 | 9606 Homo sapiens | UBA52                  |
| R-HSA-9662361 | Sensory processing of sound by outer hair cells of the cochlea    | 1 | 64  | 0.004 | 0.201272355 | 2.01E-01 | 1  | 8   | 0.0006 | 9606 Homo sapiens | ACTG1                  |
| R-HSA-5357801 | Programmed Cell Death                                             | 2 | 238 | 0.017 | 0.202908481 | 2.03E-01 | 7  | 197 | 0.0145 | 9606 Homo sapiens | HSP90AA1;UBA52         |
| R-HSA-199991  | Membrane Trafficking                                              | 4 | 667 | 0.047 | 0.204850016 | 2.05E-01 | 38 | 219 | 0.0161 | 9606 Homo sapiens | HSPA8;TUBB;UBA52;ACTG1 |
| R-HSA-5678895 | Defective CFTR causes cystic fibrosis                             | 1 | 66  | 0.005 | 0.206875079 | 2.07E-01 | 3  | 7   | 0.0005 | 9606 Homo sapiens | UBA52                  |
| R-HSA-6782210 | Gap-filling DNA repair synthesis and ligation in TC-NER           | 1 | 66  | 0.005 | 0.206875079 | 2.07E-01 | 2  | 2   | 0.0001 | 9606 Homo sapiens | UBA52                  |
| R-HSA-72662   | Activation of the mRNA upon binding of the cap-binding complex    | 1 | 66  | 0.005 | 0.206875079 | 2.07E-01 | 2  | 6   | 0.0004 | 9606 Homo sapiens | RP5A                   |
| R-HSA-5607761 | Dectin-1 mediated noncanonical NF-kB signaling                    | 1 | 66  | 0.005 | 0.206875079 | 2.07E-01 | 2  | 9   | 0.0007 | 9606 Homo sapiens | UBA52                  |
| R-HSA-9725370 | Signaling by ALK fusions and activated point mutants              | 1 | 66  | 0.005 | 0.206875079 | 2.07E-01 | 2  | 29  | 0.0021 | 9606 Homo sapiens | EEF1G                  |
| R-HSA-9700206 | Signaling by ALK in cancer                                        | 1 | 66  | 0.005 | 0.206875079 | 2.07E-01 | 2  | 37  | 0.0027 | 9606 Homo sapiens | EEF1G                  |
| R-HSA-4608870 | Asymmetric localization of PCP proteins                           | 1 | 66  | 0.005 | 0.206875079 | 2.07E-01 | 1  | 7   | 0.0005 | 9606 Homo sapiens | UBA52                  |
| R-HSA-9033241 | Peroxisomal protein import                                        | 1 | 67  | 0.005 | 0.20966198  | 2.10E-01 | 12 | 26  | 0.0019 | 9606 Homo sapiens | UBA52                  |
| R-HSA-73856   | RNA Polymerase II Transcription Termination                       | 1 | 67  | 0.005 | 0.20966198  | 2.10E-01 | 1  | 4   | 0.0003 | 9606 Homo sapiens | SRSF3                  |
| R-HSA-6782135 | Dual incision in TC-NER                                           | 1 | 68  | 0.005 | 0.212439284 | 2.12E-01 | 7  | 7   | 0.0005 | 9606 Homo sapiens | UBA52                  |
| R-HSA-2644603 | Signaling by NOTCH1 in Cancer                                     | 1 | 68  | 0.005 | 0.212439284 | 2.12E-01 | 6  | 39  | 0.0029 | 9606 Homo sapiens | UBA52                  |
| R-HSA-174154  | APC/C:Cdc20 mediated degradation of Securin                       | 1 | 68  | 0.005 | 0.212439284 | 2.12E-01 | 2  | 3   | 0.0002 | 9606 Homo sapiens | UBA52                  |
| R-HSA-983189  | Kinesins                                                          | 1 | 68  | 0.005 | 0.212439284 | 2.12E-01 | 2  | 14  | 0.0010 | 9606 Homo sapiens | TUBB                   |
| R-HSA-2644606 | Constitutive Signaling by NOTCH1 PEST Domain Mutants              | 1 | 68  | 0.005 | 0.212439284 | 2.12E-01 | 2  | 21  | 0.0015 | 9606 Homo sapiens | UBA52                  |
| R-HSA-2894858 | Signaling by NOTCH1 HD+PEST Domain Mutants in Cancer              | 1 | 68  | 0.005 | 0.212439284 | 2.12E-01 | 2  | 21  | 0.0015 | 9606 Homo sapiens | UBA52                  |
| R-HSA-2894862 | Constitutive Signaling by NOTCH1 HD+PEST Domain Mutants           | 1 | 68  | 0.005 | 0.212439284 | 2.12E-01 | 2  | 21  | 0.0015 | 9606 Homo sapiens | UBA52                  |
| R-HSA-2644602 | Signaling by NOTCH1 PEST Domain Mutants in Cancer                 | 1 | 68  | 0.005 | 0.212439284 | 2.12E-01 | 2  | 21  | 0.0015 | 9606 Homo sapiens | UBA52                  |
| R-HSA-8978934 | Metabolism of cofactors                                           | 1 | 68  | 0.005 | 0.212439284 | 2.12E-01 | 2  | 28  | 0.0021 | 9606 Homo sapiens | HSP90AA1               |
| R-HSA-379724  | tRNA Aminoacylation                                               | 1 | 68  | 0.005 | 0.212439284 | 2.12E-01 | 1  | 42  | 0.0031 | 9606 Homo sapiens | TARS1                  |
| R-HSA-450294  | MAP kinase activation                                             | 1 | 69  | 0.005 | 0.215207022 | 2.15E-01 | 4  | 32  | 0.0024 | 9606 Homo sapiens | UBA52                  |
| R-HSA-3299685 | Detoxification of Reactive Oxygen Species                         | 1 | 69  | 0.005 | 0.215207022 | 2.15E-01 | 1  | 34  | 0.0025 | 9606 Homo sapiens | PRDX1                  |
| R-HSA-68882   | Mitotic Anaphase                                                  | 2 | 249 | 0.017 | 0.217012871 | 2.17E-01 | 5  | 32  | 0.0024 | 9606 Homo sapiens | TUBB;UBA52             |
| R-HSA-69563   | p53-Dependent G1 DNA Damage Response                              | 1 | 70  | 0.005 | 0.217965227 | 2.18E-01 | 4  | 22  | 0.0016 | 9606 Homo sapiens | UBA52                  |
| R-HSA-69580   | p53-Dependent G1/S DNA damage checkpoint                          | 1 | 70  | 0.005 | 0.217965227 | 2.18E-01 | 4  | 22  | 0.0016 | 9606 Homo sapiens | UBA52                  |
| R-HSA-375165  | NCAM signaling for neurite out-growth                             | 1 | 70  | 0.005 | 0.217965227 | 2.18E-01 | 1  | 23  | 0.0017 | 9606 Homo sapiens | ANXA4                  |
| R-HSA-2555396 | Mitotic Metaphase and Anaphase                                    | 2 | 250 | 0.018 | 0.218300085 | 2.18E-01 | 5  | 33  | 0.0024 | 9606 Homo sapiens | TUBB;UBA52             |
| R-HSA-9006927 | Signaling by Non-Receptor Tyrosine Kinases                        | 1 | 71  | 0.005 | 0.220713932 | 2.21E-01 | 1  | 53  | 0.0039 | 9606 Homo sapiens | UBA52                  |
| R-HSA-8848021 | Signaling by PTK6                                                 | 1 | 71  | 0.005 | 0.220713932 | 2.21E-01 | 1  | 53  | 0.0039 | 9606 Homo sapiens | UBA52                  |
| R-HSA-69615   | G1/S DNA Damage Checkpoints                                       | 1 | 72  | 0.005 | 0.223453168 | 2.23E-01 | 6  | 26  | 0.0019 | 9606 Homo sapiens | UBA52                  |
| R-HSA-1234176 | Oxygen-dependent proline hydroxylation of Hypoxia-inducible Fac   | 1 | 72  | 0.005 | 0.223453168 | 2.23E-01 | 4  | 12  | 0.0009 | 9606 Homo sapiens | UBA52                  |
| R-HSA-5358346 | Hedgehog ligand biogenesis                                        | 1 | 72  | 0.005 | 0.223453168 | 2.23E-01 | 2  | 15  | 0.0011 | 9606 Homo sapiens | UBA52                  |
| R-HSA-1169091 | Activation of NF-kappa B in B cells                               | 1 | 72  | 0.005 | 0.223453168 | 2.23E-01 | 1  | 10  | 0.0007 | 9606 Homo sapiens | UBA52                  |
| R-HSA-5685942 | HDR through Homologous Recombination (HRR)                        | 1 | 72  | 0.005 | 0.223453168 | 2.23E-01 | 1  | 19  | 0.0014 | 9606 Homo sapiens | UBA52                  |
| R-HSA-196071  | Metabolism of steroid hormones                                    | 1 | 72  | 0.005 | 0.223453168 | 2.23E-01 | 1  | 40  | 0.0029 | 9606 Homo sapiens | AKR1B10                |
| R-HSA-4839726 | Chromatin organization                                            | 2 | 256 | 0.018 | 0.226038252 | 2.26E-01 | 28 | 85  | 0.0063 | 9606 Homo sapiens | H2AC19;H4C1            |
| R-HSA-3247509 | Chromatin modifying enzymes                                       | 2 | 256 | 0.018 | 0.226038252 | 2.26E-01 | 28 | 85  | 0.0063 | 9606 Homo sapiens | H2AC19;H4C1            |
| R-HSA-6802952 | Signaling by BRAF and RAF1 fusions                                | 1 | 73  | 0.005 | 0.226182967 | 2.26E-01 | 4  | 5   | 0.0004 | 9606 Homo sapiens | ACTG1                  |
| R-HSA-174184  | Cdc20:Phospho-APC/C mediated degradation of Cyclin A              | 1 | 73  | 0.005 | 0.226182967 | 2.26E-01 | 2  | 3   | 0.0002 | 9606 Homo sapiens | UBA52                  |
| R-HSA-68949   | Orc1 removal from chromatin                                       | 1 | 73  | 0.005 | 0.226182967 | 2.26E-01 | 2  | 4   | 0.0003 | 9606 Homo sapiens | UBA52                  |
| R-HSA-9694635 | Translation of Structural Proteins                                | 1 | 73  | 0.005 | 0.226182967 | 2.26E-01 | 1  | 43  | 0.0032 | 9606 Homo sapiens | UBA52                  |
| R-HSA-8948751 | Regulation of PTEN stability and activity                         | 1 | 74  | 0.005 | 0.228903362 | 2.29E-01 | 6  | 13  | 0.0010 | 9606 Homo sapiens | UBA52                  |
| R-HSA-174178  | APC/C:Cdh1 mediated degradation of Cdc20 and other APC/C:Cdh      | 1 | 74  | 0.005 | 0.228903362 | 2.29E-01 | 4  | 6   | 0.0004 | 9606 Homo sapiens | UBA52                  |
| R-HSA-179419  | APC-Cdc20 mediated degradation of cell cycle proteins prior to sa | 1 | 74  | 0.005 | 0.228903362 | 2.29E-01 | 4  | 6   | 0.0004 | 9606 Homo sapiens | UBA52                  |
| R-HSA-9707587 | Regulation of HMOX1 expression and activity                       | 1 | 75  | 0.005 | 0.231614383 | 2.32E-01 | 3  | 19  | 0.0014 | 9606 Homo sapiens | UBA52                  |
| R-HSA-69017   | CDK-mediated phosphorylation and removal of Cdc6                  | 1 | 75  | 0.005 | 0.231614383 | 2.32E-01 | 2  | 4   | 0.0003 | 9606 Homo sapiens | UBA52                  |
| R-HSA-9013026 | RHOB GTPase cycle                                                 | 1 | 75  | 0.005 | 0.231614383 | 2.32E-01 | 1  | 6   | 0.0004 | 9606 Homo sapiens | JUP                    |
| R-HSA-176409  | APC/C:Cdc20 mediated degradation of mitotic proteins              | 1 | 76  | 0.005 | 0.234316063 | 2.34E-01 | 8  | 13  | 0.0010 | 9606 Homo sapiens | UBA52                  |
| R-HSA-9662360 | Sensory processing of sound by inner hair cells of the cochlea    | 1 | 76  | 0.005 | 0.234316063 | 2.34E-01 | 1  | 7   | 0.0005 | 9606 Homo sapiens | ACTG1                  |
| R-HSA-162906  | HIV Infection                                                     | 2 | 264 | 0.018 | 0.236389918 | 2.36E-01 | 22 | 160 | 0.0118 | 9606 Homo sapiens | UBA52                  |
| R-HSA-176814  | Activation of APC/C and APC/C:Cdc20 mediated degradation of m     | 1 | 77  | 0.005 | 0.237008433 | 2.37E-01 | 8  | 15  | 0.0011 | 9606 Homo sapiens | UBA52                  |
| R-HSA-448424  | Interleukin-17 signalling                                         | 1 | 77  | 0.005 | 0.237008433 | 2.37E-01 | 4  | 35  | 0.0026 | 9606 Homo sapiens | UBA52                  |
| R-HSA-1834949 | Cytosolic sensors of pathogen-associated DNA                      | 1 | 78  | 0.005 | 0.239691525 | 2.40E-01 | 4  | 50  | 0.0037 | 9606 Homo sapiens | UBA52                  |
| R-HSA-9013106 | RHOE GTPase cycle                                                 | 1 | 79  | 0.006 | 0.24236537  | 2.42E-01 | 1  | 6   | 0.0004 | 9606 Homo sapiens | JUP                    |
| R-HSA-975634  | Retinoid metabolism and transport                                 | 1 | 79  | 0.006 | 0.24236537  | 2.42E-01 | 1  | 28  | 0.0021 | 9606 Homo sapiens | AKR1B10                |
| R-HSA-199992  | trans-Golgi Network Vesicle Budding                               | 1 | 80  | 0.006 | 0.245029998 | 2.45E-01 | 2  | 19  | 0.0014 | 9606 Homo sapiens | HSPA8                  |
| R-HSA-167172  | Transcription of the HIV genome                                   | 1 | 81  | 0.006 | 0.247685442 | 2.48E-01 | 12 | 47  | 0.0035 | 9606 Homo sapiens | UBA52                  |
| R-HSA-204998  | Cell death signalling via NRAGE, NRIF and NADe                    | 1 | 81  | 0.006 | 0.247685442 | 2.48E-01 | 3  | 17  | 0.0013 | 9606 Homo sapiens | UBA52                  |
| R-HSA-159236  | Transport of Mature mRNA derived from an Intron-Containing Tr     | 1 | 81  | 0.006 | 0.247685442 | 2.48E-01 | 2  | 4   | 0.0003 | 9606 Homo sapiens | SRSF3                  |
| R-HSA-69473   | G2/M DNA damage checkpoint                                        | 1 | 81  | 0.006 | 0.247685442 | 2.48E-01 | 2  | 12  | 0.0009 | 9606 Homo sapiens | H4C1                   |

|               |                                                                   |   |      |       |             |          |     |      |        |      |              |                                               |
|---------------|-------------------------------------------------------------------|---|------|-------|-------------|----------|-----|------|--------|------|--------------|-----------------------------------------------|
| R-HSA-1236394 | Signaling by ERBB4                                                | 1 | 82   | 0.006 | 0.250331732 | 2.50E-01 | 2   | 52   | 0.0038 | 9606 | Homo sapiens | UBA52                                         |
| R-HSA-8939902 | Regulation of RUNX2 expression and activity                       | 1 | 83   | 0.006 | 0.252968899 | 2.53E-01 | 9   | 32   | 0.0024 | 9606 | Homo sapiens | UBA52                                         |
| R-HSA-176408  | Regulation of APC/C activators between G1/S and early anaphase    | 1 | 83   | 0.006 | 0.252968899 | 2.53E-01 | 2   | 14   | 0.0010 | 9606 | Homo sapiens | UBA52                                         |
| R-HSA-1169408 | ISG15 antiviral mechanism                                         | 1 | 83   | 0.006 | 0.252968899 | 2.53E-01 | 1   | 16   | 0.0012 | 9606 | Homo sapiens | UBA52                                         |
| R-HSA-917937  | Iron uptake and transport                                         | 1 | 83   | 0.006 | 0.252968899 | 2.53E-01 | 1   | 34   | 0.0025 | 9606 | Homo sapiens | UBA52                                         |
| R-HSA-8852135 | Protein ubiquitination                                            | 1 | 84   | 0.006 | 0.255596974 | 2.56E-01 | 29  | 32   | 0.0024 | 9606 | Homo sapiens | UBA52                                         |
| R-HSA-1980143 | Signaling by NOTCH1                                               | 1 | 84   | 0.006 | 0.255596974 | 2.56E-01 | 6   | 39   | 0.0029 | 9606 | Homo sapiens | UBA52                                         |
| R-HSA-69620   | Cell Cycle Checkpoints                                            | 2 | 280  | 0.020 | 0.257173856 | 2.57E-01 | 9   | 56   | 0.0041 | 9606 | Homo sapiens | H4C1;UBA52                                    |
| R-HSA-6781827 | Transcription-Coupled Nucleotide Excision Repair (TC-NER)         | 1 | 85   | 0.006 | 0.258215988 | 2.58E-01 | 13  | 17   | 0.0013 | 9606 | Homo sapiens | UBA52                                         |
| R-HSA-1234174 | Cellular response to hypoxia                                      | 1 | 86   | 0.006 | 0.260825971 | 2.61E-01 | 4   | 20   | 0.0015 | 9606 | Homo sapiens | UBA52                                         |
| R-HSA-170834  | Signaling by TGF-beta Receptor Complex                            | 1 | 87   | 0.006 | 0.263426953 | 2.63E-01 | 21  | 88   | 0.0065 | 9606 | Homo sapiens | UBA52                                         |
| R-HSA-9659379 | Sensory processing of sound                                       | 1 | 87   | 0.006 | 0.263426953 | 2.63E-01 | 2   | 13   | 0.0010 | 9606 | Homo sapiens | ACTG1                                         |
| R-HSA-674695  | RNA Polymerase II Pre-transcription Events                        | 1 | 88   | 0.006 | 0.266018966 | 2.66E-01 | 3   | 17   | 0.0013 | 9606 | Homo sapiens | UBA52                                         |
| R-HSA-5654738 | Signaling by FGFR2                                                | 1 | 88   | 0.006 | 0.266018966 | 2.66E-01 | 3   | 46   | 0.0034 | 9606 | Homo sapiens | UBA52                                         |
| R-HSA-6806834 | Signaling by MET                                                  | 1 | 88   | 0.006 | 0.266018966 | 2.66E-01 | 3   | 51   | 0.0038 | 9606 | Homo sapiens | UBA52                                         |
| R-HSA-69202   | Cyclin E associated events during G1/S transition                 | 1 | 88   | 0.006 | 0.266018966 | 2.66E-01 | 2   | 20   | 0.0015 | 9606 | Homo sapiens | UBA52                                         |
| R-HSA-2995410 | Nuclear Envelope (NE) Reassembly                                  | 1 | 88   | 0.006 | 0.266018966 | 2.66E-01 | 1   | 24   | 0.0018 | 9606 | Homo sapiens | TUBB                                          |
| R-HSA-6806667 | Metabolism of fat-soluble vitamins                                | 1 | 89   | 0.006 | 0.26860204  | 2.69E-01 | 1   | 34   | 0.0025 | 9606 | Homo sapiens | AKR1B10                                       |
| R-HSA-5688426 | Deubiquitination                                                  | 2 | 289  | 0.020 | 0.268890049 | 2.69E-01 | 55  | 77   | 0.0057 | 9606 | Homo sapiens | H2AC19;UBA52                                  |
| R-HSA-72202   | Transport of Mature Transcript to Cytoplasm                       | 1 | 90   | 0.006 | 0.271176204 | 2.71E-01 | 2   | 13   | 0.0010 | 9606 | Homo sapiens | SRSF3                                         |
| R-HSA-69656   | Cyclin A:Cdk2-associated events at S phase entry                  | 1 | 90   | 0.006 | 0.271176204 | 2.71E-01 | 2   | 19   | 0.0014 | 9606 | Homo sapiens | UBA52                                         |
| R-HSA-195253  | Degradation of beta-catenin by the destruction complex            | 1 | 91   | 0.006 | 0.273741488 | 2.74E-01 | 3   | 23   | 0.0017 | 9606 | Homo sapiens | UBA52                                         |
| R-HSA-1168372 | Downstream signaling events of B Cell Receptor (BCR)              | 1 | 91   | 0.006 | 0.273741488 | 2.74E-01 | 1   | 15   | 0.0011 | 9606 | Homo sapiens | UBA52                                         |
| R-HSA-174143  | APC/C-mediated degradation of cell cycle proteins                 | 1 | 92   | 0.006 | 0.276297924 | 2.76E-01 | 16  | 40   | 0.0029 | 9606 | Homo sapiens | UBA52                                         |
| R-HSA-453276  | Regulation of mitotic cell cycle                                  | 1 | 92   | 0.006 | 0.276297924 | 2.76E-01 | 16  | 40   | 0.0029 | 9606 | Homo sapiens | UBA52                                         |
| R-HSA-5696399 | Global Genome Nucleotide Excision Repair (GG-NER)                 | 1 | 92   | 0.006 | 0.276297924 | 2.76E-01 | 14  | 20   | 0.0015 | 9606 | Homo sapiens | UBA52                                         |
| R-HSA-5632684 | Hedgehog 'on' state                                               | 1 | 92   | 0.006 | 0.276297924 | 2.76E-01 | 5   | 37   | 0.0027 | 9606 | Homo sapiens | UBA52                                         |
| R-HSA-9013694 | Signaling by NOTCH4                                               | 1 | 92   | 0.006 | 0.276297924 | 2.76E-01 | 2   | 20   | 0.0015 | 9606 | Homo sapiens | UBA52                                         |
| R-HSA-69052   | Switching of origins to a post-replicative state                  | 1 | 93   | 0.007 | 0.27884554  | 2.79E-01 | 4   | 9    | 0.0007 | 9606 | Homo sapiens | UBA52                                         |
| R-HSA-9678108 | SARS-CoV-1 Infection                                              | 1 | 93   | 0.007 | 0.27884554  | 2.79E-01 | 1   | 111  | 0.0082 | 9606 | Homo sapiens | UBA52                                         |
| R-HSA-975871  | MyD88 cascade initiated on plasma membrane                        | 1 | 94   | 0.007 | 0.281384367 | 2.81E-01 | 10  | 58   | 0.0043 | 9606 | Homo sapiens | UBA52                                         |
| R-HSA-168176  | Toll Like Receptor 5 (TLR5) Cascade                               | 1 | 94   | 0.007 | 0.281384367 | 2.81E-01 | 10  | 59   | 0.0043 | 9606 | Homo sapiens | UBA52                                         |
| R-HSA-168142  | Toll Like Receptor 10 (TLR10) Cascade                             | 1 | 94   | 0.007 | 0.281384367 | 2.81E-01 | 10  | 59   | 0.0043 | 9606 | Homo sapiens | UBA52                                         |
| R-HSA-6807505 | RNA polymerase II transcribes snRNA genes                         | 1 | 94   | 0.007 | 0.281384367 | 2.81E-01 | 9   | 11   | 0.0008 | 9606 | Homo sapiens | UBA52                                         |
| R-HSA-1169410 | Antiviral mechanism by IFN-stimulated genes                       | 1 | 94   | 0.007 | 0.281384367 | 2.81E-01 | 1   | 31   | 0.0023 | 9606 | Homo sapiens | UBA52                                         |
| R-HSA-438064  | Post NMDA receptor activation events                              | 1 | 96   | 0.007 | 0.28643577  | 2.86E-01 | 1   | 39   | 0.0029 | 9606 | Homo sapiens | TUBB                                          |
| R-HSA-5619084 | ABC transporter disorders                                         | 1 | 99   | 0.007 | 0.293947694 | 2.94E-01 | 3   | 22   | 0.0016 | 9606 | Homo sapiens | UBA52                                         |
| R-HSA-4086400 | PCP/CE pathway                                                    | 1 | 99   | 0.007 | 0.293947694 | 2.94E-01 | 1   | 24   | 0.0018 | 9606 | Homo sapiens | UBA52                                         |
| R-HSA-112310  | Neurotransmitter release cycle                                    | 1 | 100  | 0.007 | 0.296434404 | 2.96E-01 | 2   | 37   | 0.0027 | 9606 | Homo sapiens | HSPA8                                         |
| R-HSA-975138  | TRAF6 mediated induction of NFkB and MAP kinases upon TLR7/       | 1 | 101  | 0.007 | 0.29891253  | 2.99E-01 | 10  | 48   | 0.0035 | 9606 | Homo sapiens | UBA52                                         |
| R-HSA-168164  | Toll Like Receptor 3 (TLR3) Cascade                               | 1 | 102  | 0.007 | 0.301382102 | 3.01E-01 | 13  | 61   | 0.0045 | 9606 | Homo sapiens | UBA52                                         |
| R-HSA-975155  | MyD88 dependent cascade initiated on endosome                     | 1 | 102  | 0.007 | 0.301382102 | 3.01E-01 | 11  | 63   | 0.0046 | 9606 | Homo sapiens | UBA52                                         |
| R-HSA-2682334 | EPH-Ephrin signaling                                              | 1 | 102  | 0.007 | 0.301382102 | 3.01E-01 | 2   | 56   | 0.0041 | 9606 | Homo sapiens | ACTG1                                         |
| R-HSA-168181  | Toll Like Receptor 7/8 (TLR7/8) Cascade                           | 1 | 103  | 0.007 | 0.303843148 | 3.04E-01 | 11  | 66   | 0.0049 | 9606 | Homo sapiens | UBA52                                         |
| R-HSA-5668541 | TNFR2 non-canonical NF-kB pathway                                 | 1 | 104  | 0.007 | 0.306295697 | 3.06E-01 | 5   | 43   | 0.0032 | 9606 | Homo sapiens | UBA52                                         |
| R-HSA-400253  | Circadian Clock                                                   | 1 | 105  | 0.007 | 0.308739779 | 3.09E-01 | 2   | 59   | 0.0043 | 9606 | Homo sapiens | UBA52                                         |
| R-HSA-168138  | Toll Like Receptor 9 (TLR9) Cascade                               | 1 | 106  | 0.007 | 0.31117542  | 3.11E-01 | 11  | 68   | 0.0050 | 9606 | Homo sapiens | UBA52                                         |
| R-HSA-5687128 | MAPK6/MAPK4 signaling                                             | 1 | 106  | 0.007 | 0.31117542  | 3.11E-01 | 2   | 40   | 0.0029 | 9606 | Homo sapiens | UBA52                                         |
| R-HSA-937061  | TRIF(TICAM1)-mediated TLR4 signaling                              | 1 | 107  | 0.007 | 0.313602651 | 3.14E-01 | 13  | 58   | 0.0043 | 9606 | Homo sapiens | UBA52                                         |
| R-HSA-166166  | MyD88-independent TLR4 cascade                                    | 1 | 107  | 0.007 | 0.313602651 | 3.14E-01 | 13  | 60   | 0.0044 | 9606 | Homo sapiens | UBA52                                         |
| R-HSA-190236  | Signaling by FGFR                                                 | 1 | 107  | 0.007 | 0.313602651 | 3.14E-01 | 6   | 142  | 0.0105 | 9606 | Homo sapiens | UBA52                                         |
| R-HSA-6811434 | COPI-dependent Golgi-to-ER retrograde traffic                     | 1 | 107  | 0.007 | 0.313602651 | 3.14E-01 | 2   | 11   | 0.0008 | 9606 | Homo sapiens | TUBB                                          |
| R-HSA-6807878 | COPI-mediated anterograde transport                               | 1 | 107  | 0.007 | 0.313602651 | 3.14E-01 | 2   | 12   | 0.0009 | 9606 | Homo sapiens | TUBB                                          |
| R-HSA-9020702 | Interleukin-1 signaling                                           | 1 | 109  | 0.008 | 0.318431994 | 3.18E-01 | 9   | 47   | 0.0035 | 9606 | Homo sapiens | UBA52                                         |
| R-HSA-8957275 | Post-translational protein phosphorylation                        | 1 | 109  | 0.008 | 0.318431994 | 3.18E-01 | 1   | 1    | 0.0001 | 9606 | Homo sapiens | HSP90B1                                       |
| R-HSA-193704  | p75 NTR receptor-mediated signalling                              | 1 | 110  | 0.008 | 0.320834163 | 3.21E-01 | 5   | 50   | 0.0037 | 9606 | Homo sapiens | UBA52                                         |
| R-HSA-74160   | Gene expression (Transcription)                                   | 8 | 1855 | 0.130 | 0.321591278 | 3.22E-01 | 113 | 1006 | 0.0741 | 9606 | Homo sapiens | HSP90AA1;PRDX1;H2AC19;SRSF3;H4C1;UBA52;LRPPRC |
| R-HSA-9009391 | Extra-nuclear estrogen signaling                                  | 1 | 111  | 0.008 | 0.323228034 | 3.23E-01 | 1   | 38   | 0.0028 | 9606 | Homo sapiens | HSP90AA1                                      |
| R-HSA-9694516 | SARS-CoV-2 Infection                                              | 1 | 112  | 0.008 | 0.325613635 | 3.26E-01 | 1   | 116  | 0.0085 | 9606 | Homo sapiens | UBA52                                         |
| R-HSA-3371453 | Regulation of HSF1-mediated heat shock response                   | 1 | 113  | 0.008 | 0.327990995 | 3.28E-01 | 7   | 14   | 0.0010 | 9606 | Homo sapiens | HSPA8                                         |
| R-HSA-442755  | Activation of NMDA receptors and postsynaptic events              | 1 | 113  | 0.008 | 0.327990995 | 3.28E-01 | 3   | 71   | 0.0052 | 9606 | Homo sapiens | TUBB                                          |
| R-HSA-8856825 | Cargo recognition for clathrin-mediated endocytosis               | 1 | 115  | 0.008 | 0.332721101 | 3.33E-01 | 1   | 15   | 0.0011 | 9606 | Homo sapiens | UBA52                                         |
| R-HSA-9006936 | Signaling by TGFbeta family members                               | 1 | 116  | 0.008 | 0.335073904 | 3.35E-01 | 21  | 113  | 0.0083 | 9606 | Homo sapiens | UBA52                                         |
| R-HSA-112315  | Transmission across Chemical Synapses                             | 2 | 343  | 0.024 | 0.338877553 | 3.39E-01 | 5   | 63   | 0.0120 | 9606 | Homo sapiens | HSPA8;TUBB                                    |
| R-HSA-166058  | MyD88-MAL(TIRAP) cascade initiated on plasma membrane             | 1 | 118  | 0.008 | 0.339755144 | 3.40E-01 | 10  | 64   | 0.0047 | 9606 | Homo sapiens | UBA52                                         |
| R-HSA-168188  | Toll Like Receptor TLR6:TLR2 Cascade                              | 1 | 118  | 0.008 | 0.339755144 | 3.40E-01 | 3   | 66   | 0.0049 | 9606 | Homo sapiens | UBA52                                         |
| R-HSA-8878159 | Transcriptional regulation by RUNX3                               | 1 | 118  | 0.008 | 0.339755144 | 3.40E-01 | 10  | 47   | 0.0035 | 9606 | Homo sapiens | UBA52                                         |
| R-HSA-611105  | Respiratory electron transport                                    | 1 | 118  | 0.008 | 0.339755144 | 3.40E-01 | 1   | 19   | 0.0014 | 9606 | Homo sapiens | LRPPRC                                        |
| R-HSA-5696398 | Nucleotide Excision Repair                                        | 1 | 119  | 0.008 | 0.342083637 | 3.42E-01 | 27  | 37   | 0.0027 | 9606 | Homo sapiens | UBA52                                         |
| R-HSA-2672351 | Stimuli-sensing channels                                          | 1 | 119  | 0.008 | 0.342083637 | 3.42E-01 | 1   | 28   | 0.0021 | 9606 | Homo sapiens | UBA52                                         |
| R-HSA-5607764 | CLEC7A (Dectin-1) signaling                                       | 1 | 120  | 0.008 | 0.344404081 | 3.44E-01 | 6   | 45   | 0.0033 | 9606 | Homo sapiens | UBA52                                         |
| R-HSA-168179  | Toll Like Receptor TLR1:TLR2 Cascade                              | 1 | 121  | 0.008 | 0.346716505 | 3.47E-01 | 10  | 66   | 0.0049 | 9606 | Homo sapiens | UBA52                                         |
| R-HSA-181438  | Toll Like Receptor 2 (TLR2) Cascade                               | 1 | 121  | 0.008 | 0.346716505 | 3.47E-01 | 10  | 68   | 0.0050 | 9606 | Homo sapiens | UBA52                                         |
| R-HSA-9648025 | EML4 and NUDC in mitotic spindle formation                        | 1 | 121  | 0.008 | 0.346716505 | 3.47E-01 | 2   | 5    | 0.0004 | 9606 | Homo sapiens | TUBB                                          |
| R-HSA-382556  | ABC-family proteins mediated transport                            | 1 | 122  | 0.009 | 0.349020935 | 3.49E-01 | 3   | 27   | 0.0020 | 9606 | Homo sapiens | UBA52                                         |
| R-HSA-202424  | Downstream TCR signaling                                          | 1 | 124  | 0.009 | 0.353605921 | 3.54E-01 | 3   | 24   | 0.0018 | 9606 | Homo sapiens | UBA52                                         |
| R-HSA-381426  | Regulation of Insulin-like Growth Factor (IGF) transport and upta | 1 | 127  | 0.009 | 0.360424211 | 3.60E-01 | 1   | 14   | 0.0010 | 9606 | Homo sapiens | HSP90B1                                       |



|               |                                                                  |    |      |       |             |          |     |      |        |      |              |                                                                       |
|---------------|------------------------------------------------------------------|----|------|-------|-------------|----------|-----|------|--------|------|--------------|-----------------------------------------------------------------------|
| R-HSA-69239   | Synthesis of DNA                                                 | 1  | 133  | 0.009 | 0.373849749 | 3.74E-01 | 4   | 26   | 0.0019 | 9606 | Homo sapiens | UBA52                                                                 |
| R-HSA-2500257 | Resolution of Sister Chromatid Cohesion                          | 1  | 134  | 0.009 | 0.376060339 | 3.76E-01 | 4   | 8    | 0.0006 | 9606 | Homo sapiens | TUBB                                                                  |
| R-HSA-9635486 | Infection with Mycobacterium tuberculosis                        | 1  | 135  | 0.009 | 0.37826238  | 3.78E-01 | 2   | 73   | 0.0054 | 9606 | Homo sapiens | UBA52                                                                 |
| R-HSA-73857   | RNA Polymerase II Transcription                                  | 7  | 1694 | 0.119 | 0.382380365 | 3.82E-01 | 89  | 891  | 0.0656 | 9606 | Homo sapiens | PRDX1;H2AC19;SRF3;H4C1;UBA52;LRPPRC                                   |
| R-HSA-196854  | Metabolism of vitamins and cofactors                             | 2  | 379  | 0.027 | 0.384563504 | 3.85E-01 | 3   | 206  | 0.0152 | 9606 | Homo sapiens | HSP90AA1;AKR1B10                                                      |
| R-HSA-1430728 | Metabolism                                                       | 14 | 3646 | 0.255 | 0.397390069 | 3.97E-01 | 27  | 2260 | 0.1665 | 9606 | Homo sapiens | HSP90AA1;AKR1B10;PKM;HSP90AB1;TALDO1;RPSA;TKT;UBA52;GAPDH;LRPPRC;RPL6 |
| R-HSA-8878166 | Transcriptional regulation by RUNX2                              | 1  | 147  | 0.010 | 0.404111317 | 4.04E-01 | 9   | 84   | 0.0062 | 9606 | Homo sapiens | UBA52                                                                 |
| R-HSA-202403  | TCR signaling                                                    | 1  | 147  | 0.010 | 0.404111317 | 4.04E-01 | 3   | 52   | 0.0038 | 9606 | Homo sapiens | UBA52                                                                 |
| R-HSA-8856688 | Golgi-to-ER retrograde transport                                 | 1  | 148  | 0.010 | 0.406217152 | 4.06E-01 | 4   | 18   | 0.0013 | 9606 | Homo sapiens | TUBB                                                                  |
| R-HSA-2132295 | MHC class II antigen presentation                                | 1  | 149  | 0.010 | 0.408315693 | 4.08E-01 | 1   | 26   | 0.0019 | 9606 | Homo sapiens | TUBB                                                                  |
| R-HSA-69206   | G1/S Transition                                                  | 1  | 150  | 0.011 | 0.410406965 | 4.10E-01 | 2   | 61   | 0.0045 | 9606 | Homo sapiens | UBA52                                                                 |
| R-HSA-166016  | Toll Like Receptor 4 (TLR4) Cascade                              | 1  | 151  | 0.011 | 0.412490993 | 4.12E-01 | 18  | 95   | 0.0070 | 9606 | Homo sapiens | UBA52                                                                 |
| R-HSA-162909  | Host Interactions of HIV factors                                 | 1  | 151  | 0.011 | 0.412490993 | 4.12E-01 | 4   | 54   | 0.0040 | 9606 | Homo sapiens | UBA52                                                                 |
| R-HSA-71291   | Metabolism of amino acids and derivatives                        | 3  | 665  | 0.047 | 0.413932859 | 4.14E-01 | 2   | 285  | 0.0210 | 9606 | Homo sapiens | RPSA;UBA52;RPL6                                                       |
| R-HSA-163200  | Respiratory electron transport, ATP synthesis by chemiosmotic cc | 1  | 153  | 0.011 | 0.416637416 | 4.17E-01 | 1   | 31   | 0.0023 | 9606 | Homo sapiens | LRPPRC                                                                |
| R-HSA-9658195 | Leishmania infection                                             | 2  | 406  | 0.028 | 0.417983979 | 4.18E-01 | 11  | 95   | 0.0070 | 9606 | Homo sapiens | HSP90AB1;ACTG1                                                        |
| R-HSA-8980692 | RHOA GTPase cycle                                                | 1  | 154  | 0.011 | 0.418699858 | 4.19E-01 | 1   | 6    | 0.0004 | 9606 | Homo sapiens | JUP                                                                   |
| R-HSA-5668914 | Diseases of metabolism                                           | 2  | 409  | 0.029 | 0.421644916 | 4.22E-01 | 3   | 190  | 0.0140 | 9606 | Homo sapiens | TALDO1;UBA52                                                          |
| R-HSA-9664417 | Leishmania phagocytosis                                          | 1  | 157  | 0.011 | 0.424844406 | 4.25E-01 | 6   | 27   | 0.0020 | 9606 | Homo sapiens | ACTG1                                                                 |
| R-HSA-9664422 | FCGR3A-mediated phagocytosis                                     | 1  | 157  | 0.011 | 0.424844406 | 4.25E-01 | 6   | 27   | 0.0020 | 9606 | Homo sapiens | ACTG1                                                                 |
| R-HSA-9664407 | Parasite infection                                               | 1  | 157  | 0.011 | 0.424844406 | 4.25E-01 | 6   | 27   | 0.0020 | 9606 | Homo sapiens | ACTG1                                                                 |
| R-HSA-73887   | Death Receptor Signalling                                        | 1  | 159  | 0.011 | 0.428905362 | 4.29E-01 | 8   | 93   | 0.0068 | 9606 | Homo sapiens | UBA52                                                                 |
| R-HSA-9013148 | CDC42 GTPase cycle                                               | 1  | 159  | 0.011 | 0.428905362 | 4.29E-01 | 1   | 6    | 0.0004 | 9606 | Homo sapiens | JUP                                                                   |
| R-HSA-446203  | Asparagine N-linked glycosylation                                | 2  | 421  | 0.030 | 0.436175405 | 4.36E-01 | 6   | 144  | 0.0106 | 9606 | Homo sapiens | TUBB;UBA52                                                            |
| R-HSA-199977  | ER to Golgi Anterograde Transport                                | 1  | 164  | 0.011 | 0.438935216 | 4.39E-01 | 2   | 39   | 0.0029 | 9606 | Homo sapiens | TUBB                                                                  |
| R-HSA-3858494 | Beta-catenin independent WNT signaling                           | 1  | 166  | 0.012 | 0.442898641 | 4.43E-01 | 1   | 51   | 0.0038 | 9606 | Homo sapiens | UBA52                                                                 |
| R-HSA-446652  | Interleukin-1 family signaling                                   | 1  | 167  | 0.012 | 0.444870051 | 4.45E-01 | 9   | 80   | 0.0059 | 9606 | Homo sapiens | UBA52                                                                 |
| R-HSA-2187338 | Visual phototransduction                                         | 1  | 169  | 0.012 | 0.448792383 | 4.49E-01 | 1   | 92   | 0.0068 | 9606 | Homo sapiens | AKR1B10                                                               |
| R-HSA-6807070 | PTEN Regulation                                                  | 1  | 171  | 0.012 | 0.452687552 | 4.53E-01 | 8   | 56   | 0.0041 | 9606 | Homo sapiens | UBA52                                                                 |
| R-HSA-453279  | Mitotic G1 phase and G1/S transition                             | 1  | 173  | 0.012 | 0.456555742 | 4.57E-01 | 3   | 99   | 0.0073 | 9606 | Homo sapiens | UBA52                                                                 |
| R-HSA-1236974 | ER-Phagosome pathway                                             | 1  | 173  | 0.012 | 0.456555742 | 4.57E-01 | 1   | 10   | 0.0007 | 9606 | Homo sapiens | UBA52                                                                 |
| R-HSA-2871837 | FCERI mediated NF-kB activation                                  | 1  | 175  | 0.012 | 0.460397136 | 4.60E-01 | 3   | 19   | 0.0014 | 9606 | Homo sapiens | UBA52                                                                 |
| R-HSA-212436  | Generic Transcription Pathway                                    | 6  | 1555 | 0.109 | 0.466565534 | 4.67E-01 | 62  | 830  | 0.0611 | 9606 | Homo sapiens | PRDX1;H2AC19;H4C1;UBA52;LRPPRC                                        |
| R-HSA-69242   | S Phase                                                          | 1  | 180  | 0.013 | 0.468984579 | 4.70E-01 | 8   | 54   | 0.0040 | 9606 | Homo sapiens | UBA52                                                                 |
| R-HSA-3108232 | SUMO E3 ligases SUMOylate target proteins                        | 1  | 183  | 0.013 | 0.475498371 | 4.75E-01 | 2   | 131  | 0.0096 | 9606 | Homo sapiens | H4C1                                                                  |
| R-HSA-983705  | Signaling by the B Cell Receptor (BCR)                           | 1  | 189  | 0.013 | 0.486551733 | 4.87E-01 | 1   | 44   | 0.0032 | 9606 | Homo sapiens | UBA52                                                                 |
| R-HSA-2990846 | SUMOylation                                                      | 1  | 192  | 0.013 | 0.491992482 | 4.92E-01 | 2   | 140  | 0.0103 | 9606 | Homo sapiens | H4C1                                                                  |
| R-HSA-109581  | Apoptosis                                                        | 1  | 192  | 0.013 | 0.491992482 | 4.92E-01 | 2   | 141  | 0.0104 | 9606 | Homo sapiens | UBA52                                                                 |
| R-HSA-597592  | Post-translational protein modification                          | 6  | 1598 | 0.112 | 0.493951316 | 4.94E-01 | 102 | 526  | 0.0387 | 9606 | Homo sapiens | HSPA8;TUBB;H2AC19;H4C1;UBA52;HSP90B1                                  |
| R-HSA-983231  | Factors involved in megakaryocyte development and platelet pro   | 1  | 194  | 0.014 | 0.495588216 | 4.96E-01 | 2   | 43   | 0.0032 | 9606 | Homo sapiens | TUBB                                                                  |
| R-HSA-1236975 | Antigen processing-Cross presentation                            | 1  | 195  | 0.014 | 0.497376719 | 4.97E-01 | 1   | 23   | 0.0017 | 9606 | Homo sapiens | UBA52                                                                 |
| R-HSA-5621481 | C-type lectin receptors (CLRs)                                   | 1  | 203  | 0.014 | 0.511462759 | 5.11E-01 | 6   | 68   | 0.0050 | 9606 | Homo sapiens | UBA52                                                                 |
| R-HSA-112316  | Neuronal System                                                  | 2  | 489  | 0.034 | 0.514703964 | 5.15E-01 | 5   | 216  | 0.0159 | 9606 | Homo sapiens | HSPA8;TUBB                                                            |
| R-HSA-983712  | Ion channel transport                                            | 1  | 206  | 0.014 | 0.516644663 | 5.17E-01 | 1   | 45   | 0.0033 | 9606 | Homo sapiens | UBA52                                                                 |
| R-HSA-9709957 | Sensory Perception                                               | 2  | 493  | 0.035 | 0.51910494  | 5.19E-01 | 3   | 139  | 0.0102 | 9606 | Homo sapiens | AKR1B10;ACTG1                                                         |
| R-HSA-6811442 | Intra-Golgi and retrograde Golgi-to-ER traffic                   | 1  | 219  | 0.015 | 0.538484014 | 5.38E-01 | 4   | 48   | 0.0035 | 9606 | Homo sapiens | TUBB                                                                  |
| R-HSA-948021  | Transport to the Golgi and subsequent modification               | 1  | 219  | 0.015 | 0.538484014 | 5.38E-01 | 2   | 60   | 0.0044 | 9606 | Homo sapiens | TUBB                                                                  |
| R-HSA-112314  | Neurotransmitter receptors and postsynaptic signal transmission  | 1  | 232  | 0.016 | 0.559355458 | 5.59E-01 | 3   | 109  | 0.0080 | 9606 | Homo sapiens | TUBB                                                                  |
| R-HSA-2454202 | Fc epsilon receptor (FCERI) signaling                            | 1  | 235  | 0.016 | 0.56403897  | 5.64E-01 | 3   | 65   | 0.0048 | 9606 | Homo sapiens | UBA52                                                                 |
| R-HSA-1428517 | The citric acid (TCA) cycle and respiratory electron transport   | 1  | 238  | 0.017 | 0.568673687 | 5.69E-01 | 1   | 67   | 0.0049 | 9606 | Homo sapiens | LRPPRC                                                                |
| R-HSA-8951664 | Neddylation                                                      | 1  | 241  | 0.017 | 0.573260107 | 5.73E-01 | 2   | 31   | 0.0023 | 9606 | Homo sapiens | UBA52                                                                 |
| R-HSA-5619115 | Disorders of transmembrane transporters                          | 1  | 278  | 0.019 | 0.62604323  | 6.26E-01 | 3   | 87   | 0.0064 | 9606 | Homo sapiens | UBA52                                                                 |
| R-HSA-211945  | Phase I - Functionalization of compounds                         | 1  | 299  | 0.021 | 0.653096612 | 6.53E-01 | 3   | 98   | 0.0072 | 9606 | Homo sapiens | HSP90AB1                                                              |
| R-HSA-983168  | Antigen processing: Ubiquitination & Proteasome degradation      | 1  | 315  | 0.022 | 0.672412191 | 6.72E-01 | 6   | 9    | 0.0007 | 9606 | Homo sapiens | UBA52                                                                 |
| R-HSA-1257604 | PIP3 activates AKT signaling                                     | 1  | 319  | 0.022 | 0.677073956 | 6.77E-01 | 8   | 86   | 0.0063 | 9606 | Homo sapiens | UBA52                                                                 |
| R-HSA-8957322 | Metabolism of steroids                                           | 1  | 328  | 0.023 | 0.68732651  | 6.87E-01 | 1   | 244  | 0.0180 | 9606 | Homo sapiens | AKR1B10                                                               |
| R-HSA-1474244 | Extracellular matrix organization                                | 1  | 329  | 0.023 | 0.688445798 | 6.88E-01 | 1   | 319  | 0.0235 | 9606 | Homo sapiens | TKT                                                                   |
| R-HSA-9006925 | Intracellular signaling by second messengers                     | 1  | 366  | 0.026 | 0.72720943  | 7.27E-01 | 8   | 114  | 0.0084 | 9606 | Homo sapiens | UBA52                                                                 |
| R-HSA-162582  | Signal Transduction                                              | 9  | 2997 | 0.210 | 0.750516292 | 7.51E-01 | 200 | 2454 | 0.1807 | 9606 | Homo sapiens | HSP90AA1;HSP90AB1;JUP;TUBB;NF1;H2AC19;H4C1;UBA52;ACTG1                |
| R-HSA-913531  | Interferon Signaling                                             | 1  | 394  | 0.028 | 0.753362501 | 7.53E-01 | 1   | 69   | 0.0051 | 9606 | Homo sapiens | UBA52                                                                 |
| R-HSA-983169  | Class I MHC mediated antigen processing & presentation           | 1  | 474  | 0.033 | 0.815280431 | 8.15E-01 | 7   | 48   | 0.0035 | 9606 | Homo sapiens | UBA52                                                                 |
| R-HSA-211859  | Biological oxidations                                            | 1  | 549  | 0.038 | 0.859346533 | 8.59E-01 | 3   | 188  | 0.0138 | 9606 | Homo sapiens | HSP90AB1                                                              |
| R-HSA-1280218 | Adaptive Immune System                                           | 2  | 1005 | 0.070 | 0.875713921 | 8.76E-01 | 12  | 264  | 0.0194 | 9606 | Homo sapiens | TUBB;UBA52                                                            |
| R-HSA-109582  | Hemostasis                                                       | 1  | 803  | 0.056 | 0.944736921 | 9.45E-01 | 2   | 34   | 0.0246 | 9606 | Homo sapiens | TUBB                                                                  |
| R-HSA-382551  | Transport of small molecules                                     | 1  | 961  | 0.067 | 0.969367498 | 9.69E-01 | 5   | 433  | 0.0326 | 9606 | Homo sapiens | UBA52                                                                 |
| R-HSA-556833  | Metabolism of lipids                                             | 1  | 1444 | 0.101 | 0.995174588 | 9.95E-01 | 1   | 954  | 0.0703 | 9606 | Homo sapiens | AKR1B10                                                               |
